# Supplementary material for: In situ generation of acyloxyphosphoniums for mild and efficient synthesis of thioesters
Source: Royal Society of Chemistry journal article supplement (doi:10.1039/d3ob01318a), 2023-01-01
Supplement: d3ob01318a1.pdf [file d3ob01318a1.pdf]

## Supporting Information

### *In Situ* Generation of Acyloxyphosphoniums for Mild and Efficient Synthesis of Thioesters

Te-Jung Chai, Xin-Shun Chiou, Nian-Xuan Lin, Yu-Tsen Kuo, and Cheng-Kun Lin\*

*Department of Chemistry, National Chung Hsing University, Taichung 402, Taiwan*

*E-mail: cklin93@nchu.edu.tw*

| Table of Content                                                                                                                  | Pages |
|-----------------------------------------------------------------------------------------------------------------------------------|-------|
| A. General information                                                                                                            | S2    |
| B. Experimental section                                                                                                           | S2    |
| <b>Figure S1.</b> ESI-MS spectrum of the acyloxyphosphonium ion ( <b>i</b> , R = C <sub>6</sub> H <sub>4</sub> pNO <sub>2</sub> ) | S16   |
| C. NMR Spectra for the synthesized compounds                                                                                      | S17   |
| References                                                                                                                        | S103  |

## A. General Information

All solvents and reagents were commercially obtained and used as received, except when noted otherwise. NMR spectra were recorded at ambient temperature on a JEOL-400 MHz spectrometer in deuterated solvents such as CDCl<sub>3</sub> ( $\delta = 7.24$  in <sup>1</sup>H NMR,  $\delta = 77.0$  in <sup>13</sup>C NMR), with <sup>1</sup>H and <sup>13</sup>C chemical shifts reported in ppm ( $\delta$ ) relative to tetramethylsilane ( $\delta = 0.00$ ). Mass spectra were acquired on a Bruker Daltonics BioTOF III spectrometer (ESI-MS). Flash column chromatography was conducted using Merck Kieselgel Si60 (40–63  $\mu$ m), while thin-layer chromatography (TLC) plates were visualized through exposure to ultraviolet light at 254 nm and/or immersion in a staining solution (phosphomolybdic acid, ninhydrin, anisaldehyde, or potassium permanganate) followed by heating on a hot plate. Concentration was achieved through rotary evaporation, and column chromatography was performed on silica gel (70–230 mesh ASTM).

## B. Experimental section

### Characterization of the synthetic iodobenzene dicarboxylates

Efficient preparation of the required iodobenzene dicarboxylates **1a** and **1c–1j** was accomplished with minor modifications to a known method.<sup>S1</sup>

**Compound 1a.** <sup>1</sup>H NMR (400 MHz, CDCl<sub>3</sub>)  $\delta$  8.24 (d,  $J = 7.6$  Hz, 2H), 8.20 (d,  $J = 8.8$  Hz, 4H), 8.07 (d,  $J = 8.8$  Hz, 4H), 7.68 (t,  $J = 4.3$  Hz, 1H), 7.59 (t,  $J = 7.7$  Hz, 2H); <sup>13</sup>C{H} NMR (100 MHz, CDCl<sub>3</sub>)  $\delta$  169.2, 150.3, 135.4, 135.0, 132.4, 131.4, 131.2, 131.0, 129.7, 123.4, 123.3, 122.1. HRMS (APCI): calculated for [C<sub>20</sub>H<sub>13</sub>IN<sub>2</sub>O<sub>8</sub>+Na]<sup>+</sup> 558.9609, found 558.9600.

**Compound 1c.** <sup>1</sup>H NMR (400 MHz, CDCl<sub>3</sub>)  $\delta$  8.28 (d,  $J = 8.0$  Hz, 3H), 8.03–7.86 (m, 5H), 7.74 (t,  $J = 7.4$  Hz, 2H), 7.47 (t,  $J = 7.6$  Hz, 2H), 7.21 (t,  $J = 7.6$  Hz, 1H); <sup>13</sup>C{H} NMR (100 MHz, CDCl<sub>3</sub>)  $\delta$  171.8, 141.3, 136.4, 134.7, 133.4, 133.0, 131.6, 131.5, 129.8, 128.6, 128.1. HRMS (APCI): calculated for [C<sub>20</sub>H<sub>13</sub>I<sub>3</sub>O<sub>4</sub>+Na]<sup>+</sup> 720.7840, found 720.7844.

**Compound 1d.** <sup>1</sup>H NMR (400 MHz, CDCl<sub>3</sub>)  $\delta$  8.22 (dd,  $J = 8.5, 1.1$  Hz, 2H), 7.80 (dd,  $J = 12.2, 8.2$  Hz, 4H), 7.61–7.59 (m, 1H), 7.53 (t,  $J = 7.5$  Hz, 2H), 7.17–7.14 (m, 4H), 2.36 (s, 6H); <sup>13</sup>C{H} NMR (100 MHz, CDCl<sub>3</sub>)  $\delta$  171.4, 143.1, 134.9, 131.6, 130.9, 130.1, 128.9, 127.3, 122.2, 21.6. HRMS (APCI): calculated for [C<sub>22</sub>H<sub>19</sub>IO<sub>4</sub>+Na]<sup>+</sup> 497.0222, found 497.0220.

**Compound 1e.** <sup>1</sup>H NMR (400 MHz, CDCl<sub>3</sub>)  $\delta$  8.25–8.23 (m, 2H), 7.94–7.92 (m, 4H), 7.63–7.48 (m, 5H), 7.39–7.35 (m, 4H); <sup>13</sup>C{H} NMR (100 MHz, CDCl<sub>3</sub>)  $\delta$  171.3, 134.8, 132.5, 131.7, 131.0, 130.1, 130.0, 128.2, 122.3. HRMS (APCI): calculated for [C<sub>20</sub>H<sub>15</sub>IO<sub>4</sub>+Na]<sup>+</sup> 469.9909, found 469.9901.

**Compound 1f.**  $^1\text{H}$  NMR (400 MHz,  $\text{CDCl}_3$ )  $\delta$  8.08 (dd,  $J = 8.3, 0.9$  Hz, 2H), 7.58 (d,  $J = 7.6$  Hz, 1H), 7.49 (t,  $J = 7.8$  Hz, 2H), 2.24 (t,  $J = 7.4$  Hz, 4H), 1.57 (quin,  $J = 7.4$ , 4H), 0.88 (t,  $J = 7.4$  Hz, 6H);  $^{13}\text{C}\{\text{H}\}$  NMR (100 MHz,  $\text{CDCl}_3$ )  $\delta$  178.8, 134.8, 131.6, 130.8, 121.7, 35.9, 19.1, 13.7. HRMS (APCI): calculated for  $[\text{C}_{14}\text{H}_{19}\text{IO}_4+\text{Na}]^+$  401.0222, found 401.0219.

**Compound 1g.**  $^1\text{H}$  NMR (400 MHz,  $\text{CDCl}_3$ )  $\delta$  7.94–7.92 (m, 2H), 7.55 (t,  $J = 7.5$  Hz, 1H), 7.43–7.40 (m, 2H), 7.29–7.18 (m, 10H), 3.57 (s, 4H);  $^{13}\text{C}\{\text{H}\}$  NMR (100 MHz,  $\text{CDCl}_3$ )  $\delta$  176.1, 134.5, 134.4, 131.4, 130.6, 129.0, 128.2, 126.6, 121.7, 40.8. HRMS (APCI): calculated for  $[\text{C}_{22}\text{H}_{19}\text{IO}_4+\text{Na}]^+$  497.0222, found 497.0224.

**Compound 1h.**  $^1\text{H}$  NMR (400 MHz,  $\text{CDCl}_3$ )  $\delta$  8.01 (d,  $J = 8.4$  Hz, 2H), 7.54 (d,  $J = 7.5$  Hz, 1H), 7.47 (t,  $J = 7.6$  Hz, 2H), 1.12 (s, 18H);  $^{13}\text{C}\{\text{H}\}$  NMR (100 MHz,  $\text{CDCl}_3$ )  $\delta$  183.6, 134.2, 131.2, 130.6, 122.0, 38.9, 27.7. HRMS (APCI): calculated for  $[\text{C}_{16}\text{H}_{23}\text{IO}_4+\text{Na}]^+$  429.0535, found 429.0535.

**Compound 1i.**  $^1\text{H}$  NMR (400 MHz,  $\text{CDCl}_3$ )  $\delta$  7.87 (d,  $J = 8.1$  Hz, 2H), 7.70 (d,  $J = 8.1$  Hz, 4H), 7.62 (d,  $J = 7.3$  Hz, 1H), 7.53–7.40 (m, 8H), 7.27–7.23 (m, 6H), 7.10–7.08 (m, 4H), 6.64 (d,  $J = 7.5$  Hz, 2H), 5.02 (dd,  $J = 13.2, 6.0$  Hz, 2H), 3.17 (d,  $J = 5.8$  Hz, 4H);  $^{13}\text{C}\{\text{H}\}$  NMR (100 MHz,  $\text{CDCl}_3$ )  $\delta$  175.8, 166.8, 136.2, 134.9, 133.9, 132.1, 131.7, 131.1, 129.5, 129.3, 128.5, 128.5, 127.0, 121.6, 53.5, 38.4. HRMS (APCI): calculated for  $[\text{C}_{38}\text{H}_{33}\text{IN}_2\text{O}_6+\text{Na}]^+$  763.1274, found 763.1269.

**Compound 1j.**  $^1\text{H}$  NMR (400 MHz,  $\text{CDCl}_3$ )  $\delta$  7.36 (s, 15H), 5.26 (d,  $J = 7.9$  Hz, 2H), 5.12 (s, 4H), 4.35 (s, 2H), 2.25–2.17 (m, 2H), 1.01 (d,  $J = 6.6$  Hz, 6H), 0.93 (d,  $J = 6.7$  Hz, 6H);  $^{13}\text{C}\{\text{H}\}$  NMR (100 MHz,  $\text{CDCl}_3$ )  $\delta$  175.2, 156.4, 135.9, 128.2, 128.0, 127.9, 127.8, 127.8, 127.8, 127.6, 66.8, 58.7, 18.7, 17.1. HRMS (APCI): calculated for  $[\text{C}_{32}\text{H}_{37}\text{IN}_2\text{O}_8+\text{Na}]^+$  727.1485, found 727.1486.

**General procedure for the synthesis of thioesters.** A sealed tube (5 mL) containing a mixture of **1a** (402 mg, 1.5 equiv) and  $\text{Ph}_3\text{P}$  (262 mg, 2.0 equiv) in toluene (2.5 mL) was heated at 80 °C for 1 hour. Then, **2a** (62.1 mg, 0.5 mmol) was added to the mixture, which was kept stirring at 80 °C for an additional 0.5 hour. Upon completion of the reaction, as determined by TLC analysis, the mixture was concentrated under reduced pressure and purified by column chromatography.

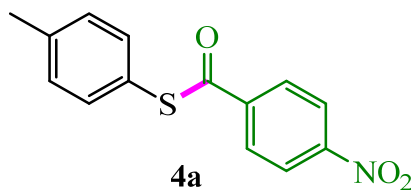

**S-(4-Methylphenyl) 4-nitrobenzothioate (4a).**<sup>S2</sup> The reaction was carried out according on the general procedure. Starting from *p*-thiocresol (62.1 mg, 0.5 mmol) and compound **1a** (402 mg, 1.5 equiv), the title compound was obtained as a pale yellow solid (131 mg, 96%).  $R_f = 0.7$  (hexanes/EtOAc = 3 : 1);  $^1\text{H NMR}$  (400 MHz,  $\text{CDCl}_3$ )  $\delta$  8.32 (d,  $J = 8.5$  Hz, 2H), 8.16 (d,  $J = 8.5$  Hz, 2H), 7.38 (d,  $J = 8.1$  Hz, 2H), 7.28 (d,  $J = 7.8$  Hz, 2H);  $^{13}\text{C}\{\text{H}\}$  NMR (100 MHz,  $\text{CDCl}_3$ )  $\delta$  189.4, 150.7, 141.4, 140.6, 134.9, 130.5, 128.6, 124.1, 122.7, 21.5; HRMS (APCI): calculated for  $\text{C}_{14}\text{H}_{11}\text{O}_3\text{NS}$ :  $M^+$  273.0454, found 273.0459, found 273.0454.

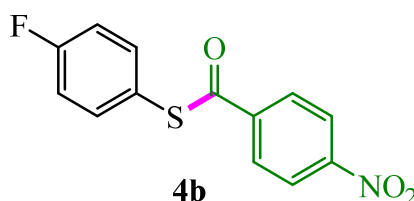

**S-(4-Fluorophenyl) 4-nitrobenzothioate (4b).** The reaction was carried out according on the general procedure. Starting from 4-fluorobenzenethiol (53  $\mu\text{L}$ , 0.5 mmol) and compound **1a** (402 mg, 1.5 equiv), the title compound was obtained as a pale yellow solid (114 mg, 82%).  $R_f = 0.6$  (hexanes/EtOAc = 3 : 1);  $^1\text{H NMR}$  (400 MHz,  $\text{CDCl}_3$ )  $\delta$  8.33 (d,  $J = 8.8$  Hz, 2H), 8.15 (d,  $J = 8.9$  Hz, 2H), 7.49–7.46 (m, 2H), 7.20–7.15 (m, 2H);  $^{13}\text{C}\{\text{H}\}$  NMR (100 MHz,  $\text{CDCl}_3$ )  $\delta$  188.9, 165.1, 162.6, 150.7, 141.0, 137.0, 128.5, 124.0, 117.0; HRMS (APCI): calculated for  $\text{C}_{13}\text{H}_8\text{O}_3\text{NFS}$ :  $M^+$  277.0203, found 277.0209.

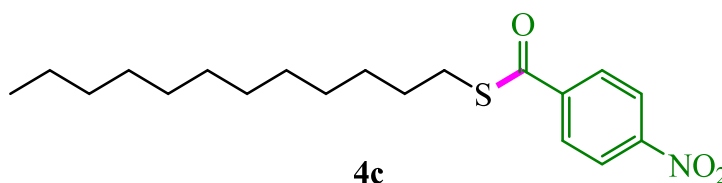

**S-Dodecyl 4-nitrobenzothioate (4c).**<sup>S3</sup> The reaction was carried out according on the general procedure. Starting from 1-dodecanethiol (120  $\mu\text{L}$ , 0.5 mmol) and compound **1a** (402 mg, 1.5 equiv), the title compound was obtained as a white solid (130 mg, 74%).  $R_f = 0.6$  (hexanes/EtOAc = 12 : 1);  $^1\text{H NMR}$  (400 MHz,  $\text{CDCl}_3$ )  $\delta$  8.28 (d,  $J = 8.8$  Hz, 2H), 8.10 (d,  $J = 8.8$  Hz, 2H), 3.10 (t,  $J = 7.4$  Hz, 2H), 1.71–1.63 (m, 2H), 1.43–1.37 (m, 2H), 1.28–1.24 (m, 17H), 0.86 (t,  $J = 6.8$  Hz, 3H);  $^{13}\text{C}\{\text{H}\}$  NMR (100 MHz,  $\text{CDCl}_3$ )  $\delta$  190.6, 150.4, 141.8, 128.2, 123.8, 31.9, 29.6, 29.5, 29.5, 29.3, 29.3, 29.1,



28.9, 22.7, 14.1; HRMS (APCI): calculated for C<sub>19</sub>H<sub>29</sub>O<sub>3</sub>NS: M<sup>+</sup> 351.1863, found 351.1859.

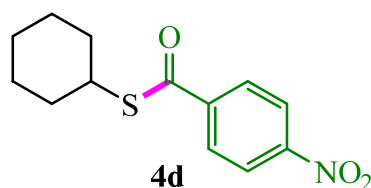

**S-Cyclohexyl 4-nitrobenzothioate (4d).**<sup>S4</sup> The reaction was carried out according on the general procedure. Starting from cyclohexanethiol (61  $\mu$ L, 0.5 mmol) and compound **1a** (402 mg, 1.5 equiv), the title compound was obtained as a pale yellow solid (133 mg, 100%).  $R_f$  = 0.7 (hexanes/EtOAc = 3 : 1); <sup>1</sup>H NMR (400 MHz, CDCl<sub>3</sub>)  $\delta$  8.26 (d,  $J$  = 9.1 Hz, 2H), 8.07 (d,  $J$  = 9.1 Hz, 2H), 3.78–3.75 (m, 1H), 2.02–2.00 (m, 2H), 1.76–1.73 (m, 2H), 1.63–1.60 (m, 1H), 1.55–1.44 (m, 4H), 1.33–1.30 (m, 1H); <sup>13</sup>C{H} NMR (100 MHz, CDCl<sub>3</sub>)  $\delta$  190.6, 150.4, 141.8, 128.2, 123.8, 31.9, 29.6, 29.5, 29.3, 29.1, 28.9, 22.7, 14.1; HRMS (APCI): calculated for C<sub>13</sub>H<sub>16</sub>O<sub>3</sub>NS: [M+H]<sup>+</sup> 266.0845, found 266.0845.

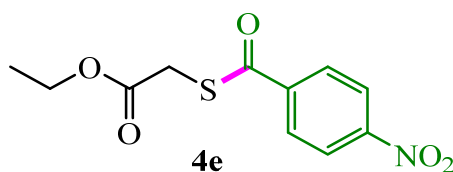

**Ethyl 2-((4-nitrobenzoyl)thio)acetate (4e).**<sup>S5</sup> The reaction was carried out according on the general procedure. Starting from ethyl mercaptoacetate (548  $\mu$ L, 5 mmol) and compound **1a** (4.02 g, 1.5 equiv), the title compound was obtained as a white solid (1.21 g, 90%).  $R_f$  = 0.5 (hexanes/EtOAc = 3 : 1); <sup>1</sup>H NMR (400 MHz, CDCl<sub>3</sub>)  $\delta$  8.31 (d,  $J$  = 8.0 Hz, 2H), 8.12 (d,  $J$  = 8.0 Hz, 2H), 4.23 (q,  $J$  = 7.1 Hz, 2H), 3.91 (s, 2H), 1.29 (t,  $J$  = 7.1 Hz, 3H); <sup>13</sup>C{H} NMR (100 MHz, CDCl<sub>3</sub>)  $\delta$  188.8, 168.1, 150.7, 140.6, 128.4, 124.0, 62.2, 31.8, 14.1; HRMS (APCI): calculated for C<sub>11</sub>H<sub>12</sub>O<sub>5</sub>NS: [M+H]<sup>+</sup> 270.0431, found 270.0434.

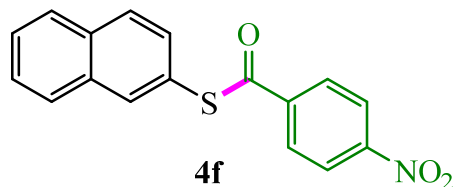

**S-(2-Naphthyl) 4-nitrobenzothioate (4f).**<sup>S6</sup> The reaction was carried out according on the general procedure. Starting from 2-naphthalenethiol (80.1 mg, 0.5 mmol) and compound **1a** (402 mg, 1.5 equiv), the title compound was obtained as a yellow solid (136 mg, 88%).  $R_f$  = 0.5 (hexanes/EtOAc = 6 : 1); <sup>1</sup>H NMR (400 MHz, CDCl<sub>3</sub>)  $\delta$  8.35 (d,  $J$  = 8.7 Hz, 2H), 8.20 (d,  $J$  = 8.7 Hz, 2H), 8.05 (s, 1H), 7.94 (d,  $J$  = 8.5 Hz, 1H), 7.90–7.85 (m, 2H), 7.57–7.51 (m, 3H); <sup>13</sup>C{H} NMR (100 MHz, CDCl<sub>3</sub>)

$\delta$  189.1, 150.7, 141.3, 135.0, 133.6, 130.9, 129.2, 128.5, 128.0, 127.9, 127.5, 126.8, 124.0, 123.4;  
HRMS (APCI): calculated for  $C_{17}H_{12}O_3NS$ :  $[M+H]^+$  310.0532, found 310.0535.

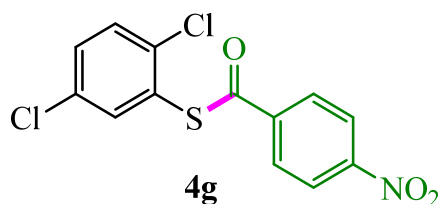

**S-(2,5-Dichlorophenyl) 4-nitrobenzothioate (4g).** The reaction was carried out according on the general procedure. Starting from 2,5-dichlorobenzenethiol (89.5 mg, 0.5 mmol) and compound **1a** (402 mg, 1.5 equiv), the title compound was obtained as a white solid (126 mg, 77%).  $R_f$  = 0.8 (hexanes/EtOAc = 3 : 1);  $^1H$  NMR (400 MHz,  $CDCl_3$ )  $\delta$  8.35 (d,  $J$  = 9.1 Hz, 2H), 8.17 (d,  $J$  = 8.9 Hz, 2H), 7.60 (d,  $J$  = 2.5 Hz, 1H), 7.51 (d,  $J$  = 8.7 Hz, 1H), 7.41 (dd,  $J$  = 8.5, 2.5 Hz, 1H);  $^{13}C\{H\}$  NMR (100 MHz,  $CDCl_3$ )  $\delta$  186.3, 150.8, 140.6, 137.3, 136.8, 133.0, 131.8, 131.3, 128.7, 127.4, 124.1; HRMS (APCI): calculated for  $C_{13}H_8O_3NCl_2S$ :  $[M+H]^+$  327.95965, found 327.95967.

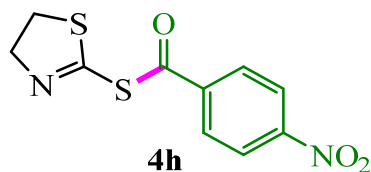

**S-Thiazolinyl 4-nitrobenzothioate (4h).** The reaction was carried out according on the general procedure. Starting from 2-thiazoline-2-thiol (59.6 mg, 0.5 mmol) and compound **1a** (402 mg, 1.5 equiv), the title compound was obtained as a yellow solid (118 mg, 89%).  $R_f$  = 0.4 (hexanes/EtOAc = 1 : 1);  $^1H$  NMR (400 MHz,  $CDCl_3$ )  $\delta$  8.23 (d,  $J$  = 8.8 Hz, 2H), 7.77 (d,  $J$  = 8.9 Hz, 2H), 4.58 (t,  $J$  = 7.3 Hz, 2H), 3.51 (t,  $J$  = 7.2 Hz, 2H);  $^{13}C\{H\}$  NMR (100 MHz,  $CDCl_3$ )  $\delta$  202.1, 169.2, 149.5, 139.7, 129.8, 123.5, 56.0, 29.8; HRMS (APCI): calculated for  $C_{10}H_9O_3N_2S_2$ :  $[M+H]^+$  269.0049, found 269.0046.

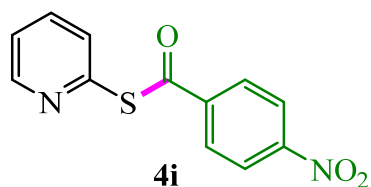

**S-Pyridinyl 4-nitrobenzothioate (4i).**<sup>S7</sup> The reaction was carried out according on the general procedure. Starting from 2-mercaptopyridine (55.6 mg, 0.5 mmol) and compound **1a** (402 mg, 1.5 equiv), the title compound was obtained as a yellow oil (89.8 mg, 69%).  $R_f$  = 0.5 (hexanes/EtOAc =

1 : 1);  $^1\text{H}$  NMR (400 MHz,  $\text{CDCl}_3$ )  $\delta$  8.70 (dd,  $J = 4.8, 1.1$  Hz, 1H), 8.35 (d,  $J = 8.9$  Hz, 2H), 8.17 (d,  $J = 8.9$  Hz, 2H), 7.83 (td,  $J = 7.7, 1.9$  Hz, 1H), 7.74–7.72 (m, 1H), 7.39 (ddd,  $J = 7.6, 4.9, 1.2$  Hz, 1H);  $^{13}\text{C}\{\text{H}\}$  NMR (100 MHz,  $\text{CDCl}_3$ )  $\delta$  188.2, 150.9, 150.1, 141.2, 137.7, 130.9, 128.7, 124.3, 124.2, 124.1; HRMS (APCI): calculated for  $\text{C}_{12}\text{H}_8\text{N}_2\text{O}_3\text{S}$ :  $[\text{M}+\text{Na}]^+$  283.0148, found 283.0141.

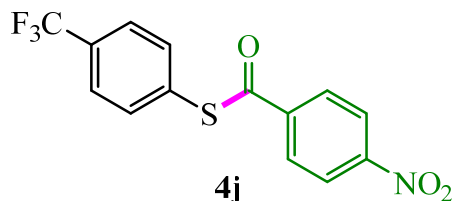

**S-(4-(Trifluoromethyl)phenyl) 4-nitrobenzothioate (4j).** The reaction was carried out according on the general procedure. Starting from 4-(trifluoromethyl)thiophenol (89.1 mg, 0.5 mmol) and compound **1a** (402 mg, 1.5 equiv), the title compound was obtained as a white solid (124 mg, 76%).  $R_f = 0.8$  (hexanes/EtOAc = 3 : 1);  $^1\text{H}$  NMR (400 MHz,  $\text{CDCl}_3$ )  $\delta$  8.36 (d,  $J = 9.0$  Hz, 2H), 8.18 (d,  $J = 8.9$  Hz, 2H), 7.75 (d,  $J = 8.3$  Hz, 2H), 7.66 (d,  $J = 8.1$  Hz, 2H);  $^{13}\text{C}\{\text{H}\}$  NMR (100 MHz,  $\text{CDCl}_3$ )  $\delta$  187.7, 150.9, 140.8, 135.1, 132.1 (q,  $J_{\text{C-F}} = 29.8$  Hz), 130.9, 128.6, 126.3, 124.1, 123.7 (q,  $J_{\text{C-F}} = 268.4$  Hz); HRMS (EI): calculated for  $\text{C}_{14}\text{H}_8\text{F}_3\text{NO}_3\text{S}$  ( $\text{M}^+$ ), 327.0177, found 327.0180.

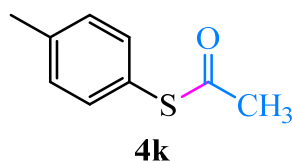

**S-(p-Tolyl) ethanethioate (4k).**<sup>S8</sup> The reaction was carried out according on the general procedure. Starting from *p*-thiocresol (62.1 mg, 0.5 mmol) and compound **1b** (242 mg, 1.5 equiv), the title compound was obtained as a yellow liquid (53.2 mg, 64%).  $R_f = 0.6$  (hexanes/EtOAc = 3 : 1);  $^1\text{H}$  NMR (400 MHz,  $\text{CDCl}_3$ )  $\delta$  7.30–7.21 (m, 4H), 2.41 (s, 3H), 2.37 (s, 3H);  $^{13}\text{C}\{\text{H}\}$  NMR (100 MHz,  $\text{CDCl}_3$ )  $\delta$  194.7, 139.7, 134.4, 130.0, 124.4, 30.1, 21.3; HRMS (EI): calculated for  $\text{C}_9\text{H}_{10}\text{OS}$  ( $\text{M}^+$ ), 166.0452, found 166.0453.

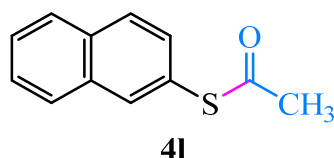

**S-(Naphthalen-2-yl) ethanethioate (4l).**<sup>S9</sup> The reaction was carried out according on the general procedure. Starting from 2-naphthalenethiol (80.1 mg, 0.5 mmol) and compound **1b** (242 mg, 1.5 equiv), the title compound was obtained as a brown solid (64.7 mg, 64%).  $R_f = 0.6$  (hexanes/EtOAc

= 3 : 1);  $^1\text{H}$  NMR (400 MHz,  $\text{CDCl}_3$ )  $\delta$  7.95–7.82 (m, 4H), 7.53–7.44 (m, 3H), 2.46 (s, 3H);  $^{13}\text{C}\{\text{H}\}$  NMR (100 MHz,  $\text{CDCl}_3$ )  $\delta$  194.3, 134.3, 133.5, 133.3, 130.8, 128.8, 127.9, 127.7, 127.1, 126.5, 125.2, 30.2; HRMS (EI): calculated for  $\text{C}_{12}\text{H}_{10}\text{OS}$  ( $\text{M}^+$ ), 202.0452, found 202.0455.

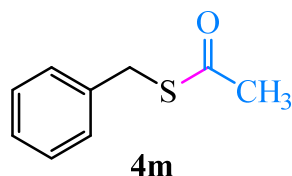

**S-Benzyl ethanethioate (4m).**<sup>S10</sup> The reaction was carried out according on the general procedure. Starting from benzyl mercaptan (587  $\mu\text{L}$ , 5 mmol) and compound **1b** (2.42 g, 1.5 equiv), the title compound was obtained as a yellow liquid (657 mg, 79%).  $R_f$  = 0.4 (hexanes/EtOAc = 15 : 1);  $^1\text{H}$  NMR (400 MHz,  $\text{CDCl}_3$ )  $\delta$  7.30–7.26 (m, 5H), 4.12 (s, 2H), 2.35 (s, 3H);  $^{13}\text{C}\{\text{H}\}$  NMR (100 MHz,  $\text{CDCl}_3$ )  $\delta$  195.0, 137.5, 128.7, 128.5, 127.2, 33.4, 30.2; HRMS (EI): calculated for  $\text{C}_9\text{H}_{10}\text{OS}$  ( $\text{M}^+$ ), 166.0452, found 166.0444.

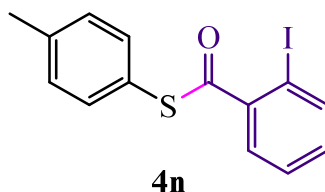

**S-(p-Tolyl) 2-iodobenzothioate (4n).**<sup>S11</sup> The reaction was carried out according on the general procedure. Starting from *p*-thiocresol (62.1 mg, 0.5 mmol) and compound **1c** (524 mg, 1.5 equiv), the title compound was obtained as a white solid (122 mg, 69%). a white solid (122 mg, 69%).  $R_f$  = 0.7 (hexanes/EtOAc = 3 : 1);  $^1\text{H}$  NMR (400 MHz,  $\text{CDCl}_3$ )  $\delta$  7.96 (d,  $J$  = 8.0 Hz, 1H), 7.70 (dd,  $J$  = 7.6, 1.4 Hz, 1H), 7.46–7.42 (m, 3H), 7.29–7.26 (m, 2H), 7.19 (dd,  $J$  = 7.8, 1.5 Hz, 1H), 2.40 (s, 3H);  $^{13}\text{C}\{\text{H}\}$  NMR (100 MHz,  $\text{CDCl}_3$ )  $\delta$  192.8, 142.4, 140.7, 140.0, 134.5, 132.3, 130.2, 128.5, 127.9, 123.8, 91.5, 21.4; HRMS (EI): calculated for  $\text{C}_{14}\text{H}_{11}\text{IOS}$  ( $\text{M}^+$ ), 353.9575, found 353.9575.

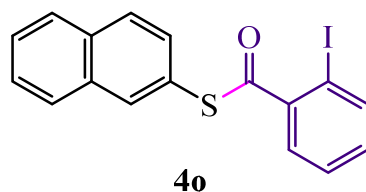

**S-(Naphthalen-2-yl) 2-iodobenzothioate (4o).**<sup>S12</sup> The reaction was carried out according on the general procedure. Starting from 2-naphthalenethiol (801 mg, 5 mmol) and compound **1c** (5.24 g, 1.5 equiv), the title compound was obtained as a brown solid (1.50 g, 77%).  $R_f$  = 0.6 (hexanes/EtOAc =

3 : 1);  $^1\text{H}$  NMR (400 MHz,  $\text{CDCl}_3$ )  $\delta$  8.08 (s, 1H), 7.99–7.87 (m, 4H), 7.77–7.75 (m, 1H), 7.61–7.47 (m, 4H), 7.20 (s, 1H);  $^{13}\text{C}\{\text{H}\}$  NMR (100 MHz,  $\text{CDCl}_3$ )  $\delta$  192.4, 142.2, 140.8, 134.5, 133.5, 133.4, 132.4, 130.7, 128.9, 128.6, 128.0, 128.0, 127.8, 127.2, 126.6, 124.7, 91.6; HRMS (EI): calculated for  $\text{C}_{17}\text{H}_{11}\text{IOS}$  ( $\text{M}^+$ ), 389.9575, found 389.9585.

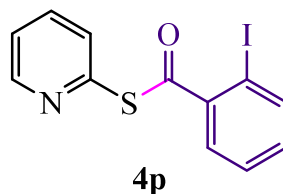

**S-(Pyridin-2-yl) 2-iodobenzothioate (4p).** The reaction was carried out according on the general procedure. Starting from 2-mercaptopyridine (55.6 mg, 0.5 mmol) and compound **1c** (524 mg, 1.5 equiv), the title compound was obtained as a colorless liquid (113 mg, 66%).  $R_f = 0.6$  (hexanes/EtOAc = 1 : 1);  $^1\text{H}$  NMR (400 MHz,  $\text{CDCl}_3$ )  $\delta$  8.64 (d,  $J = 4.6$  Hz, 1H), 7.94 (d,  $J = 7.8$  Hz, 1H), 7.78–7.72 (m, 3H), 7.42 (t,  $J = 7.5$  Hz, 1H), 7.31 (dd,  $J = 8.6, 4.7$  Hz, 1H), 7.19–7.15 (m, 1H);  $^{13}\text{C}\{\text{H}\}$  NMR (100 MHz,  $\text{CDCl}_3$ )  $\delta$  191.1, 151.2, 150.4, 141.8, 140.9, 137.3, 132.7, 130.2, 128.8, 128.0, 123.8, 91.5; HRMS (MALDI-TOF): calculated for  $\text{C}_{12}\text{H}_9\text{INOS}$  ( $\text{M}+\text{H}^+$ ), 341.9444, found 341.9451.

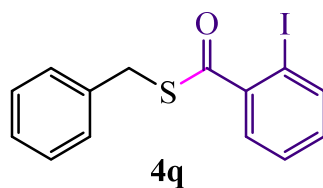

**S-Benzyl 2-iodobenzothioate (4q).**<sup>S13</sup> The reaction was carried out according on the general procedure. Starting from benzyl mercaptan (59  $\mu\text{L}$ , 0.5 mmol) and compound **1c** (524 mg, 1.5 equiv), the title compound was obtained as a yellow liquid (103 mg, 58%).  $R_f = 0.5$  (hexanes/EtOAc = 15 : 1);  $^1\text{H}$  NMR (400 MHz,  $\text{CDCl}_3$ )  $\delta$  7.94 (d,  $J = 7.7$  Hz, 1H), 7.59 (d,  $J = 7.4$  Hz, 1H), 7.40–7.26 (m, 6H), 7.15 (t,  $J = 7.4$  Hz, 1H), 4.34 (s, 2H);  $^{13}\text{C}\{\text{H}\}$  NMR (100 MHz,  $\text{CDCl}_3$ )  $\delta$  193.4, 142.3, 140.8, 137.0, 132.4, 129.0, 128.8, 128.7, 127.9, 127.4, 91.3, 34.4; HRMS (EI): calculated for  $\text{C}_{14}\text{H}_{11}\text{IOS}$  ( $\text{M}^+$ ), 353.9575, found 353.9567.

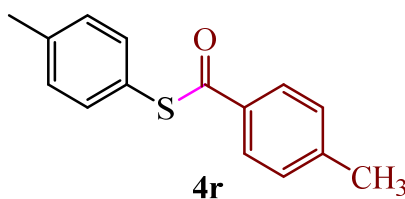

**S-(p-Tolyl) 4-methylbenzothioate (4r).**<sup>S14</sup> The reaction was carried out according on the general

procedure. Starting from *p*-thiocresol (621 mg, 5 mmol) and compound **1d** (3.56 g, 1.5 equiv), the title compound was obtained as a white solid (957 mg, 79%).  $R_f = 0.5$  (hexanes/EtOAc = 15 : 1);  $^1\text{H}$  NMR (400 MHz,  $\text{CDCl}_3$ )  $\delta$  7.95 (d,  $J = 8.2$  Hz, 2H), 7.42 (d,  $J = 8.1$  Hz, 2H), 7.28–7.26 (m, 4H), 2.42 (s, 3H), 2.41 (s, 3H);  $^{13}\text{C}\{\text{H}\}$  NMR (100 MHz,  $\text{CDCl}_3$ )  $\delta$  189.8, 144.3, 139.5, 134.9, 134.0, 129.9, 129.2, 127.4, 123.8, 21.5, 21.2; HRMS (EI): calculated for  $\text{C}_{15}\text{H}_{14}\text{OS}$  ( $\text{M}^+$ ), 242.0765, found 242.0770.

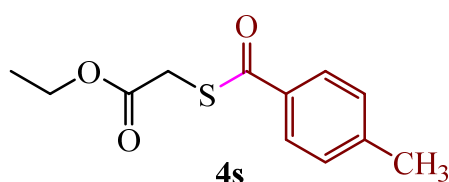

**Ethyl 2-((4-methylbenzoyl)thio)acetate (4s).** The reaction was carried out according on the general procedure. Starting from ethyl mercaptoacetate (55  $\mu\text{L}$ , 0.5 mmol) and compound **1d** (356 mg, 1.5 equiv), the title compound was obtained as a white solid (91.7 mg, 77%).  $R_f = 0.2$  (hexanes/EtOAc = 15 : 1);  $^1\text{H}$  NMR (400 MHz,  $\text{CDCl}_3$ )  $\delta$  7.87 (d,  $J = 8.2$  Hz, 2H), 7.25 (d,  $J = 8.1$  Hz, 2H), 4.22 (d,  $J = 7.1$  Hz, 2H), 3.86 (s, 2H), 2.40 (s, 3H), 1.29 (t,  $J = 7.1$  Hz, 3H);  $^{13}\text{C}\{\text{H}\}$  NMR (100 MHz,  $\text{CDCl}_3$ )  $\delta$  189.6, 168.9, 144.7, 133.6, 129.3, 127.4, 61.8, 31.3, 21.6, 14.1; HRMS (EI): calculated for  $\text{C}_{12}\text{H}_{14}\text{O}_3\text{S}$  ( $\text{M}^+$ ), 238.0664, found 238.0659.

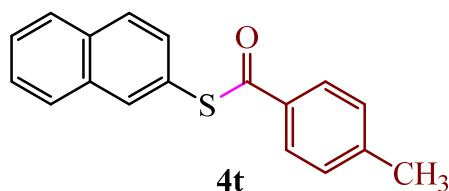

**S-(Naphthalen-2-yl) 4-methylbenzothioate (4t).**<sup>S21</sup> The reaction was carried out according on the general procedure. Starting from 2-naphthalenethiol (80.1 mg, 0.5 mmol) and compound **1d** (356 mg, 1.5 equiv), the title compound was obtained as a white solid (107 mg, 77%).  $R_f = 0.5$  (hexanes/EtOAc = 15 : 1);  $^1\text{H}$  NMR (400 MHz,  $\text{CDCl}_3$ )  $\delta$  8.05 (s, 1H), 7.97–7.85 (m, 5H), 7.57–7.52 (m, 3H), 7.31 (d,  $J = 8.0$  Hz, 2H), 2.45 (s, 3H);  $^{13}\text{C}\{\text{H}\}$  NMR (100 MHz,  $\text{CDCl}_3$ )  $\delta$  189.9, 144.6, 135.0, 134.1, 133.6, 133.4, 131.5, 129.4, 128.7, 128.0, 127.8, 127.6, 127.1, 126.5, 124.9, 21.7; HRMS (EI): calculated for  $\text{C}_{18}\text{H}_{14}\text{OS}$  ( $\text{M}^+$ ), 278.0765, found 278.0770.

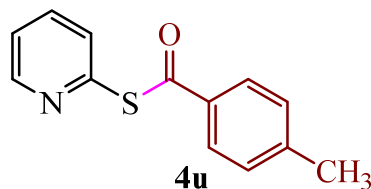

**S-(Pyridin-2-yl) 4-methylbenzothioate (4u).**<sup>S15</sup> The reaction was carried out according on the general procedure. Starting from 2-mercaptopyridine (55.6 mg, 0.5 mmol) and compound **1d** (356 mg, 1.5 equiv), the title compound was obtained as a white solid (110 mg, 96%).  $R_f = 0.3$  (hexanes/EtOAc = 3 : 1);  $^1\text{H NMR}$  (400 MHz,  $\text{CDCl}_3$ )  $\delta$  8.68 (dq,  $J = 4.8, 0.9$  Hz, 1H), 7.92 (dd,  $J = 8.2$  Hz, 2H), 7.81–7.71 (m, 2H), 7.35–7.27 (m, 3H), 2.43 (s, 3H);  $^{13}\text{C}\{^1\text{H}\}$  NMR (100 MHz,  $\text{CDCl}_3$ )  $\delta$  188.8, 151.4, 150.4, 144.9, 137.1, 133.9, 130.9, 129.5, 127.6, 123.5, 77.3, 77.0, 76.7, 21.7; HRMS (EI): calculated for  $\text{C}_{13}\text{H}_{11}\text{NOS}$  ( $\text{M}^+$ ), 229.0561, found 229.0567.

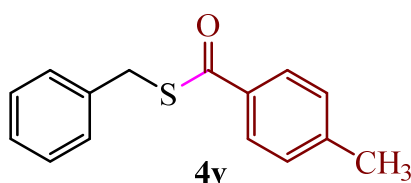

**S-Benzyl 4-methylbenzothioate (4v).**<sup>S16</sup> The reaction was carried out according on the general procedure. Starting from benzyl mercaptan (59  $\mu\text{L}$ , 0.5 mmol) and compound **1d** (356 mg, 1.5 equiv), the title compound was obtained as a colorless liquid (89.7 mg, 74%).  $R_f = 0.5$  (hexanes/EtOAc = 15 : 1);  $^1\text{H NMR}$  (400 MHz,  $\text{CDCl}_3$ )  $\delta$  7.87 (d,  $J = 8.2$  Hz, 2H), 7.38–7.25 (m, 7H), 4.31 (s, 2H), 2.40 (s, 3H);  $^{13}\text{C}\{^1\text{H}\}$  NMR (100 MHz,  $\text{CDCl}_3$ )  $\delta$  190.8, 144.3, 137.6, 134.2, 129.2, 128.9, 128.6, 127.3, 127.2, 76.7, 33.2, 21.6; HRMS (EI): calculated for  $\text{C}_{15}\text{H}_{14}\text{OS}$  ( $\text{M}^+$ ), 242.0765, found 242.0757.

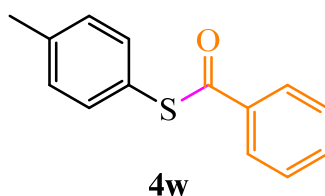

**S-(*p*-Tolyl) benzothioate (4w).**<sup>S17</sup> The reaction was carried out according on the general procedure. Starting from *p*-thiocresol (62.1 mg, 0.5 mmol) and compound **1e** (335 mg, 1.5 equiv), the title compound was obtained as a white solid (106 mg, 93%).  $R_f = 0.6$  (hexanes/EtOAc = 5 : 1);  $^1\text{H NMR}$  (400 MHz,  $\text{CDCl}_3$ )  $\delta$  8.04–8.02 (m, 2H), 7.62–7.58 (m, 1H), 7.50–7.46 (m, 2H), 7.40 (d,  $J = 8.1$  Hz, 2H), 7.29–7.23 (m, 2H), 2.40 (s, 3H);  $^{13}\text{C}\{^1\text{H}\}$  NMR (100 MHz,  $\text{CDCl}_3$ )  $\delta$  190.5, 139.8, 136.6, 135.0, 133.5, 130.1, 128.7, 127.4, 123.7, 21.3; HRMS (EI): calculated for  $\text{C}_{14}\text{H}_{12}\text{OS}$  ( $\text{M}^+$ ), 228.0609, found 228.0614.

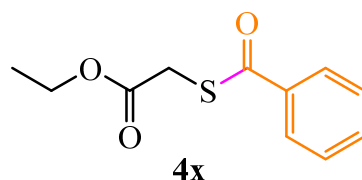

**Ethyl 2-(benzoylthio)acetate (4x).**<sup>S18</sup> The reaction was carried out according on the general procedure. Starting from ethyl mercaptoacetate (55  $\mu$ L, 0.5 mmol) and compound **1e** (335 mg, 1.5 equiv), the title compound was obtained as a yellow liquid (108 mg, 96%).  $R_f$  = 0.5 (hexanes/EtOAc = 3 : 1);  $^1\text{H}$  NMR (400 MHz,  $\text{CDCl}_3$ )  $\delta$  7.97–7.95 (m, 2H), 7.57 (d,  $J$  = 7.4 Hz, 1H), 7.47–7.43 (m, 2H), 4.22 (q,  $J$  = 7.1 Hz, 2H), 3.87 (s, 2H), 1.28 (t,  $J$  = 7.1 Hz, 3H);  $^{13}\text{C}\{\text{H}\}$  NMR (100 MHz,  $\text{CDCl}_3$ )  $\delta$  190.0, 168.7, 136.1, 133.7, 128.6, 127.3, 61.8, 31.4, 14.0; HRMS (EI): calculated for  $\text{C}_{11}\text{H}_{12}\text{O}_3\text{S}$  ( $\text{M}^+$ ), 224.0507, found 224.0509.

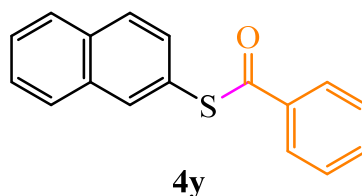

**S-(Naphthalen-2-yl) benzothioate (4y).**<sup>S19</sup> The reaction was carried out according on the general procedure. Starting from 2-naphthalenethiol (80.1 mg, 0.5 mmol) and compound **1e** (335 mg, 1.5 equiv), the title compound was obtained as a colorless liquid (185 mg, 70%).  $R_f$  = 0.5 (hexanes/EtOAc = 6 : 1);  $^1\text{H}$  NMR (400 MHz,  $\text{CDCl}_3$ )  $\delta$  8.08 (d,  $J$  = 7.3 Hz, 3H), 7.94–7.85 (m, 3H), 7.62 (d,  $J$  = 7.4 Hz, 1H), 7.58–7.49 (m, 5H);  $^{13}\text{C}\{\text{H}\}$  NMR (100 MHz,  $\text{CDCl}_3$ )  $\delta$  190.4, 136.6, 135.0, 133.7, 133.6, 133.4, 131.4, 128.8, 128.8, 128.0, 127.8, 127.5, 127.2, 126.5, 124.6; HRMS (EI): calculated for  $\text{C}_{17}\text{H}_{12}\text{OS}$  ( $\text{M}^+$ ), 264.0609, found 264.0602.

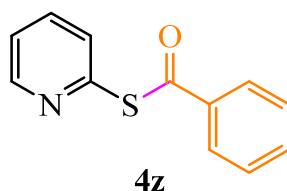

**S-(Pyridin-2-yl) benzothioate (4z).**<sup>S20</sup> The reaction was carried out according on the general procedure. Starting from 2-mercaptopyridine (556 mg, 5 mmol) and compound **1e** (3.35 g, 1.5 equiv), the title compound was obtained as a yellow solid (689 mg, 64%).  $R_f$  = 0.3 (hexanes/EtOAc = 3 : 1);  $^1\text{H}$  NMR (400 MHz,  $\text{CDCl}_3$ )  $\delta$  8.69–8.68 (m, 1H), 8.04–8.02 (m, 2H), 7.82–7.73 (m, 2H), 7.65–7.61 (m, 1H), 7.52–7.48 (m, 2H), 7.35–7.33 (m, 1H);  $^{13}\text{C}\{\text{H}\}$  NMR (100 MHz,  $\text{CDCl}_3$ )  $\delta$  189.3, 151.3,



150.5, 137.2, 136.5, 133.9, 130.9, 128.8, 127.6, 123.6; HRMS (EI): calculated for C<sub>12</sub>H<sub>9</sub>NOS (M<sup>+</sup>), 215.0405, found 215.0409.

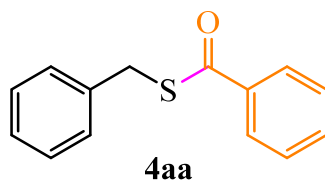

**S-Benzyl benzothioate (4aa).**<sup>S21</sup> The reaction was carried out according on the general procedure. Starting from benzyl mercaptan (59  $\mu$ L, 0.5 mmol) and compound **1e** (335 mg, 1.5 equiv), the title compound was obtained as a colorless liquid (83.3 mg, 73%).  $R_f = 0.5$  (hexanes/EtOAc = 5 : 1); <sup>1</sup>H NMR (400 MHz, CDCl<sub>3</sub>)  $\delta$  7.99–7.97 (m, 2H), 7.59–7.55 (m, 1H), 7.46–7.38 (m, 4H), 7.34–7.32 (t,  $J = 7.6$  Hz, 2H), 7.28–7.25 (m, 1H), 4.33 (s, 2H); <sup>13</sup>C{H} NMR (100 MHz, CDCl<sub>3</sub>)  $\delta$  191.3, 137.4, 136.7, 133.4, 128.9, 128.6, 128.6, 127.3, 127.3, 33.3; HRMS (EI): calculated for C<sub>14</sub>H<sub>12</sub>OS (M<sup>+</sup>), 228.0609, found 228.0601.

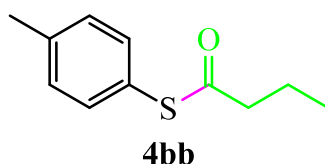

**S-(*p*-Tolyl) butanethioate (4bb).**<sup>S22</sup> The reaction was carried out according on the general procedure. Starting from *p*-thiocresol (62.1 mg, 0.5 mmol) and compound **1f** (284 mg, 1.5 equiv), the title compound was obtained as a colorless liquid (68.0 mg, 70%).  $R_f = 0.8$  (hexanes/EtOAc = 3 : 1); <sup>1</sup>H NMR (400 MHz, CDCl<sub>3</sub>)  $\delta$  7.30–7.20 (m, 4H), 2.62 (t,  $J = 7.3$  Hz, 2H), 2.37 (s, 3H), 1.74 (sextet,  $J = 7.3$  Hz, 2H), 0.99 (t,  $J = 7.4$  Hz, 3H); <sup>13</sup>C{H} NMR (100 MHz, CDCl<sub>3</sub>)  $\delta$  198.0, 139.5, 134.4, 130.0, 124.4, 45.4, 21.3, 19.1, 13.5; HRMS (EI): calculated for C<sub>11</sub>H<sub>14</sub>OS (M<sup>+</sup>), 194.0765, found 194.0776.

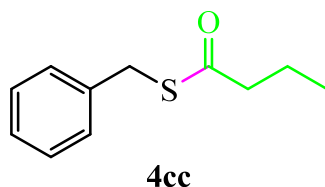

**S-Benzyl butanethioate (4cc).**<sup>S23</sup> The reaction was carried out according on the general procedure. Starting from benzyl mercaptan (59  $\mu$ L, 0.5 mmol) and compound **1f** (284 mg, 1.5 equiv), the title compound was obtained as a colorless liquid (66.1 mg, 68%).  $R_f = 0.7$  (hexanes/EtOAc = 3 : 1); <sup>1</sup>H NMR (400 MHz, CDCl<sub>3</sub>)  $\delta$  7.30–7.26 (m, 5H), 4.12 (s, 2H), 2.55 (t,  $J = 7.4$  Hz, 2H), 1.71 (d,  $J = 7.4$  Hz, 2H), 0.95 (t,  $J = 7.4$  Hz, 3H); <sup>13</sup>C{H} NMR (100 MHz, CDCl<sub>3</sub>)  $\delta$  198.9, 137.7, 128.8, 128.6,

127.2, 45.6, 33.0, 19.1, 13.5; HRMS (EI): calculated for C<sub>11</sub>H<sub>14</sub>OS (M<sup>+</sup>), 194.0765, found 194.0772.

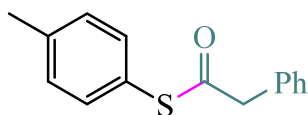

**4dd**

**S-(*p*-Tolyl) 2-phenylethanethioate (4dd).**<sup>S24</sup> The reaction was carried out according on the general procedure. Starting from *p*-thiocresol (62.1 mg, 0.5 mmol) and compound **1g** (356 mg, 1.5 equiv), the title compound was obtained as a white solid (90.9 mg, 75%). *R<sub>f</sub>* = 0.7 (hexanes/EtOAc = 3 : 1); <sup>1</sup>H NMR (400 MHz, CDCl<sub>3</sub>) δ 7.35–7.25 (m, 7H), 7.19 (d, *J* = 7.8 Hz, 2H), 3.90 (s, 2H), 2.35 (s, 3H); <sup>13</sup>C{H} NMR (100 MHz, CDCl<sub>3</sub>) δ 176.1, 134.5, 134.4, 131.4, 130.6, 129.1, 129.0, 128.2, 126.6, 121.7, 40.8; HRMS (EI): calculated for C<sub>15</sub>H<sub>14</sub>OS (M<sup>+</sup>), 242.0765, found 242.0758.

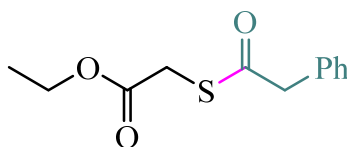

**4ee**

**Ethyl 2-((2-phenylacetyl)thio)acetate (4ee).**<sup>S25</sup> The reaction was carried out according on the general procedure. Starting from ethyl mercaptoacetate (55 μL, 0.5 mmol) and compound **1g** (356 mg, 1.5 equiv), the title compound was obtained as a colorless liquid (82.2 mg, 69%). *R<sub>f</sub>* = 0.4 (hexanes/EtOAc = 3 : 1); <sup>1</sup>H NMR (400 MHz, CDCl<sub>3</sub>) δ 7.30–7.24 (m, 5H), 4.13 (q, *J* = 7.0 Hz, 2H), 3.84 (s, 2H), 3.63 (s, 2H), 1.21 (t, *J* = 7.2 Hz, 3H); <sup>13</sup>C{H} NMR (100 MHz, CDCl<sub>3</sub>) δ 195.6, 168.5, 132.9, 129.6, 128.7, 127.6, 61.8, 49.9, 31.6, 14.0; HRMS (EI): calculated for C<sub>12</sub>H<sub>14</sub>O<sub>3</sub>S (M<sup>+</sup>), 238.0664, found 238.0667.

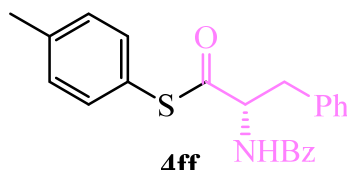

**4ff**

**S-(*p*-Tolyl) (S)-2-benzamido-3-phenylpropanethioate (4ff).**<sup>S26</sup> The reaction was carried out according on the general procedure. Starting from *p*-thiocresol (62.1 mg, 0.5 mmol) and compound **1i** (555 mg, 1.5 equiv), the title compound was obtained as a white solid (122 mg, 65%). *R<sub>f</sub>* = 0.4 (hexanes/EtOAc = 3 : 1); <sup>1</sup>H NMR (400 MHz, CDCl<sub>3</sub>) δ 7.75 (d, *J* = 7.3 Hz, 2H), 7.52 (t, *J* = 7.3 Hz, 1H), 7.42 (t, *J* = 7.6 Hz, 2H), 7.36–7.22 (m, 9H), 6.76 (t, *J* = 6.4 Hz, 1H), 5.37–5.33 (m, 1H), 3.31 (d, *J* = 6.3 Hz, 2H), 2.39 (s, 3H); <sup>13</sup>C{H} NMR (100 MHz, CDCl<sub>3</sub>) δ 198.7, 167.0, 139.9, 135.4, 134.4,

133.6, 131.8, 130.1, 129.4, 128.7, 128.6, 127.2, 127.0, 123.1, 59.7, 38.2, 21.3; HRMS (EI): calculated for C<sub>23</sub>H<sub>21</sub>NO<sub>2</sub>S (M<sup>+</sup>), 375.1293, found 375.1290.

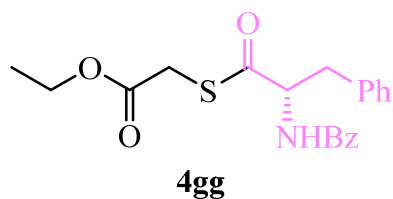

**Ethyl 2-((benzoyl-L-phenylalanyl)thio)acetate (4gg).** The reaction was carried out according on the general procedure. Starting from ethyl mercaptoacetate (55  $\mu$ L, 0.5 mmol) and compound **1i** (555 mg, 1.5 equiv), the title compound was obtained as a white solid (130 mg, 70%).  $R_f$  = 0.1 (hexanes/EtOAc = 3 : 1); <sup>1</sup>H NMR (400 MHz, CDCl<sub>3</sub>)  $\delta$  7.68 (d,  $J$  = 7.8 Hz, 2H), 7.53–7.47 (m, 1H), 7.41 (t,  $J$  = 7.3 Hz, 2H), 7.33–7.26 (m, 3H), 7.21 (d,  $J$  = 7.2 Hz, 2H), 6.50 (d,  $J$  = 7.9 Hz, 1H), 5.30–5.23 (m, 1H), 4.20 (dd,  $J$  = 13.7, 6.6 Hz, 2H), 3.75 (d,  $J$  = 15.0 Hz, 1H), 3.66 (d,  $J$  = 16.0 Hz, 1H), 3.30–3.27 (m, 2H), 1.29 (t,  $J$  = 7.1 Hz, 3H); <sup>13</sup>C {<sup>1</sup>H} NMR (100 MHz, CDCl<sub>3</sub>)  $\delta$  198.7, 168.4, 167.1, 135.2, 133.5, 132.0, 129.4, 128.8, 128.7, 127.4, 127.0, 61.9, 59.7, 38.0, 31.4, 14.1; HRMS (EI): calculated for C<sub>20</sub>H<sub>21</sub>NO<sub>4</sub>S (M<sup>+</sup>), 371.1191, found 371.1187.

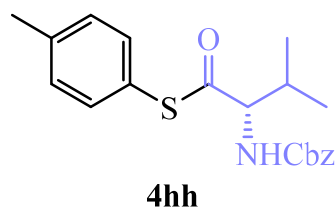

**S-(*p*-Tolyl) (S)-2-(((benzyloxy)carbonyl)amino)-3-methylbutanethioate (4hh).**<sup>S27</sup> The reaction was carried out according on the general procedure. Starting from *p*-thiocresol (62.1 mg, 0.5 mmol) and compound **1j** (528 mg, 1.5 equiv), the title compound was obtained as a white solid (122 mg, 68%).  $R_f$  = 0.6 (hexanes/EtOAc = 3 : 1); <sup>1</sup>H NMR (400 MHz, CDCl<sub>3</sub>)  $\delta$  7.42–7.32 (m, 7H), 7.25 (d,  $J$  = 7.8 Hz, 2H), 5.71 (d,  $J$  = 9.2 Hz, 1H), 5.23 (s, 2H), 4.57 (m, 1H), 2.41 (s, 3H), 2.41–2.39 (m, 1H), 1.09 (d,  $J$  = 6.6 Hz, 3H), 0.98 (d,  $J$  = 6.6 Hz, 3H); <sup>13</sup>C {<sup>1</sup>H} NMR (100 MHz, CDCl<sub>3</sub>)  $\delta$  198.9, 156.1, 139.5, 136.0, 134.3, 129.8, 128.3, 128.0, 127.8, 123.4, 67.0, 65.6, 30.9, 21.0, 19.1, 16.7; HRMS (EI): calculated for C<sub>20</sub>H<sub>23</sub>NO<sub>3</sub>S (M<sup>+</sup>), 357.1399, found 357.1403.

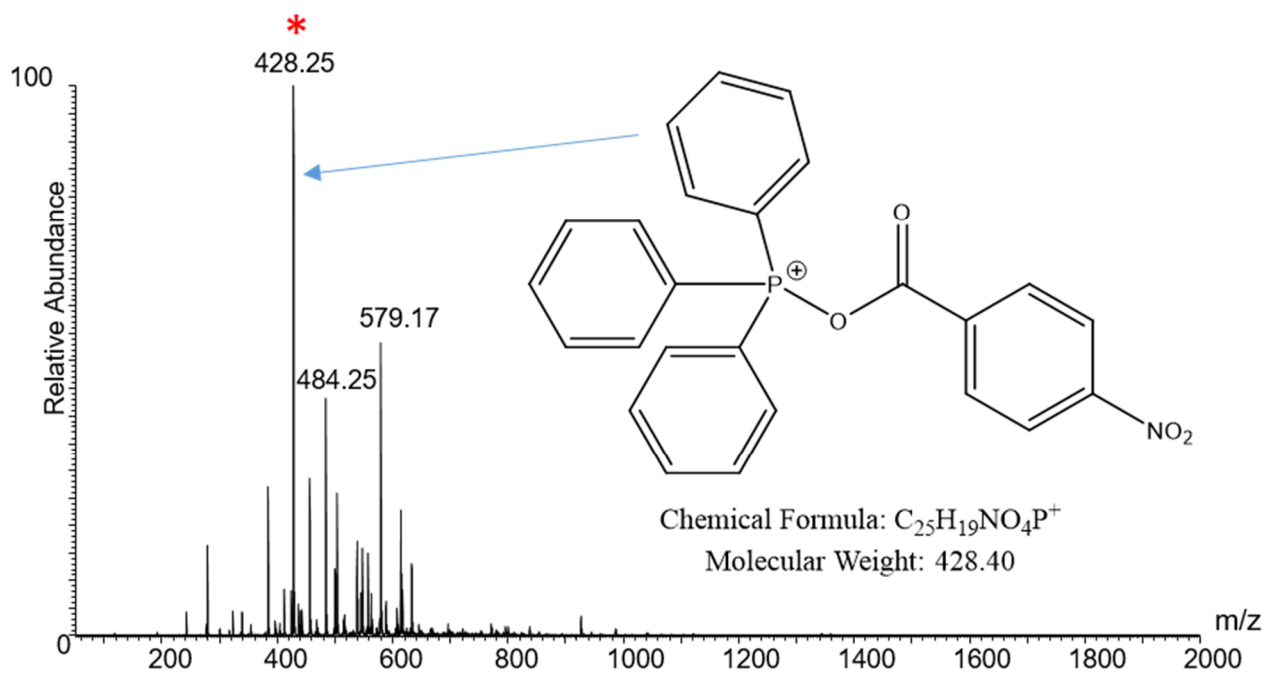

**Figure S1.** ESI-MS spectrum of the acyloxyphosphonium ion (**i**, R =  $C_6H_4pNO_2$ )

## C. NMR Spectra for the synthesized compounds

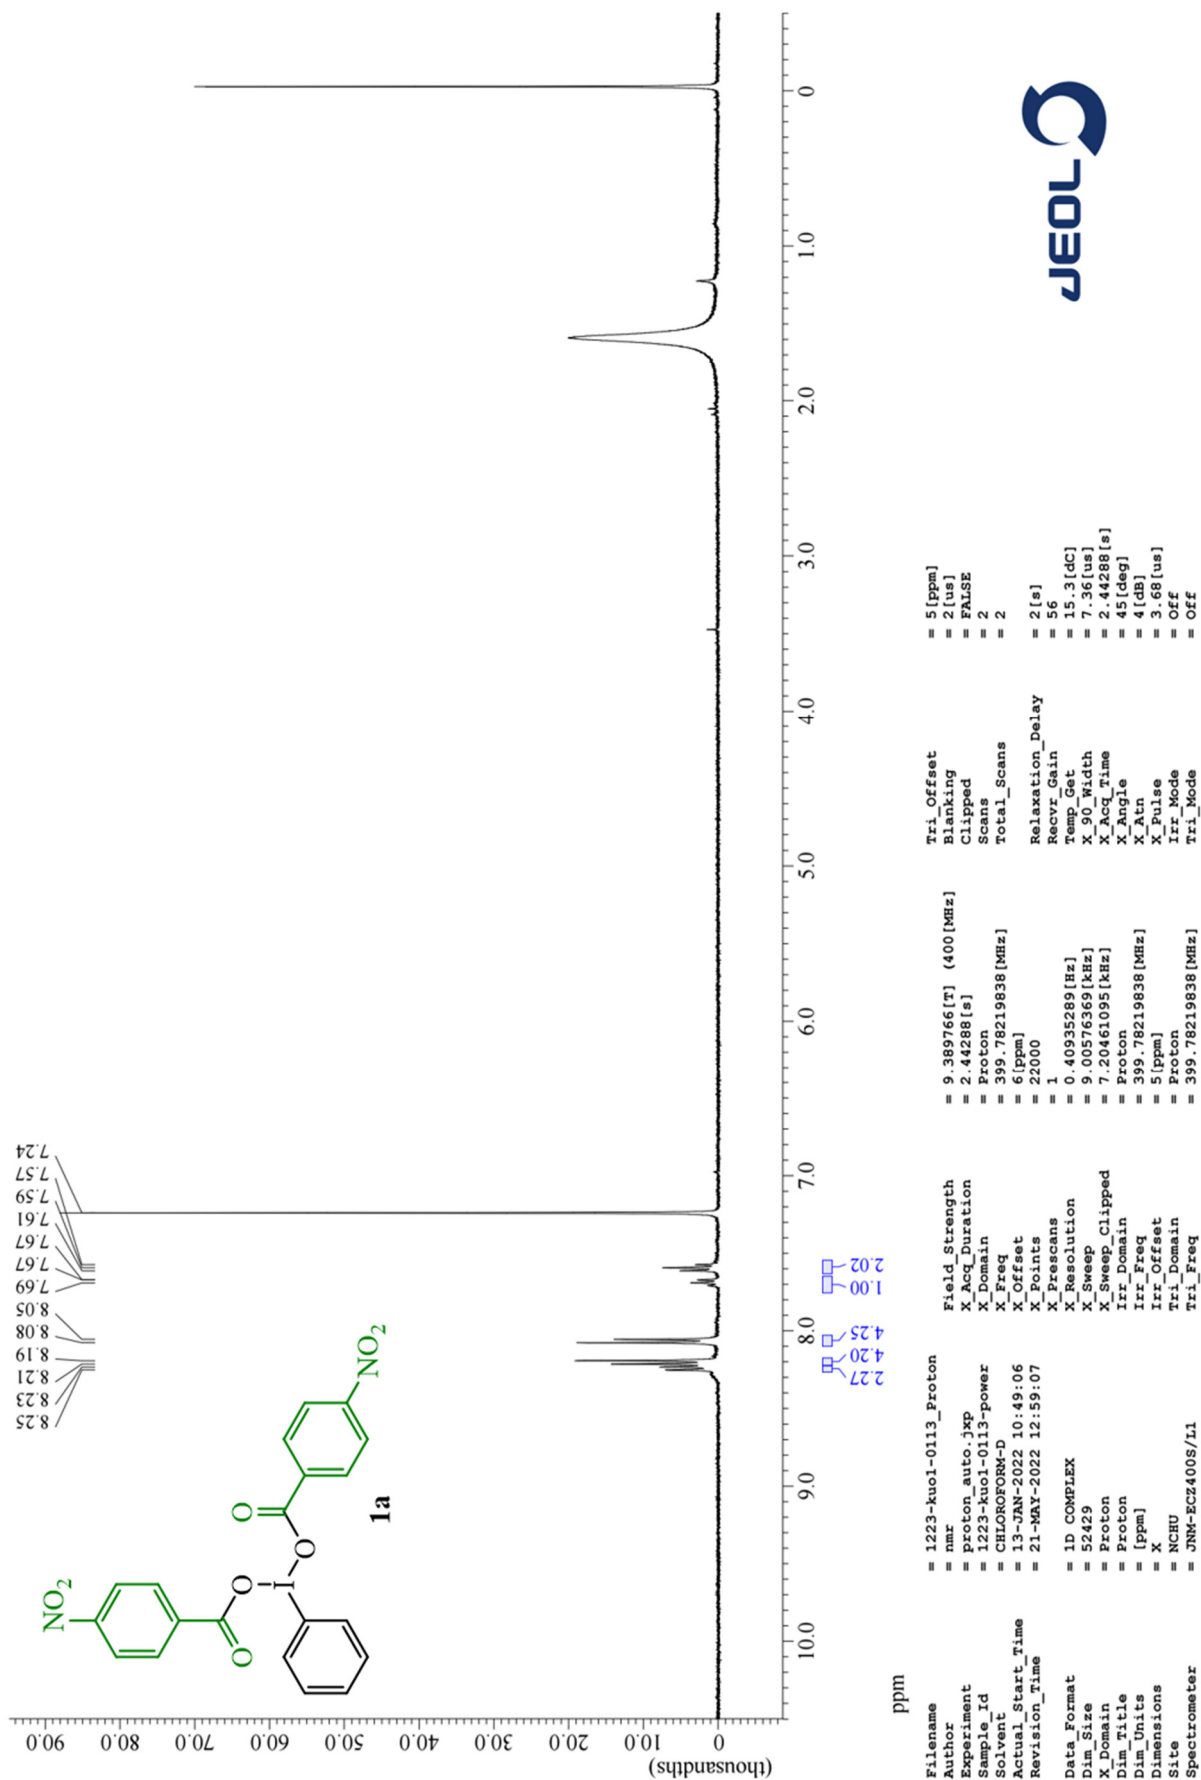

<sup>1</sup>H NMR spectrum of compound **1a** (400 MHz, CDCl<sub>3</sub>)

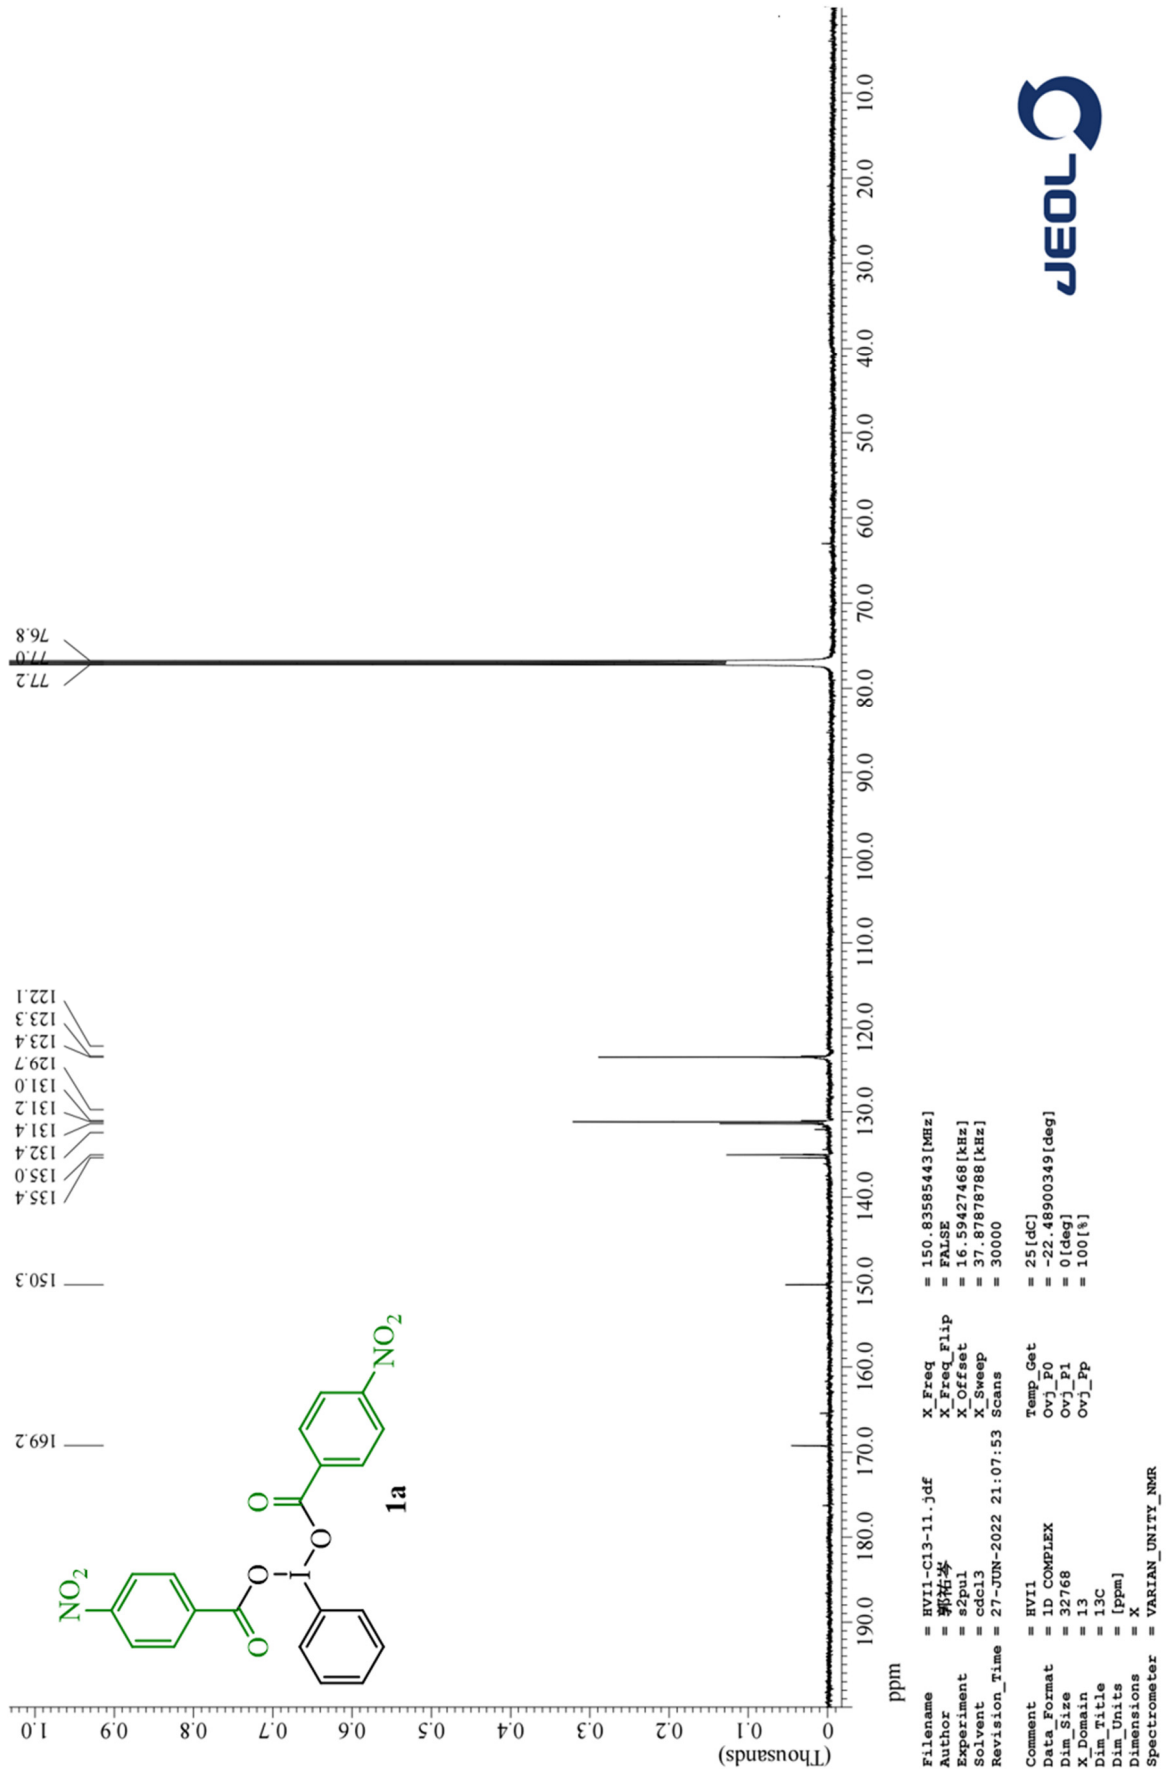

$^{13}\text{C}\{\text{H}\}$  NMR spectrum of compound **1a** (100 MHz,  $\text{CDCl}_3$ )

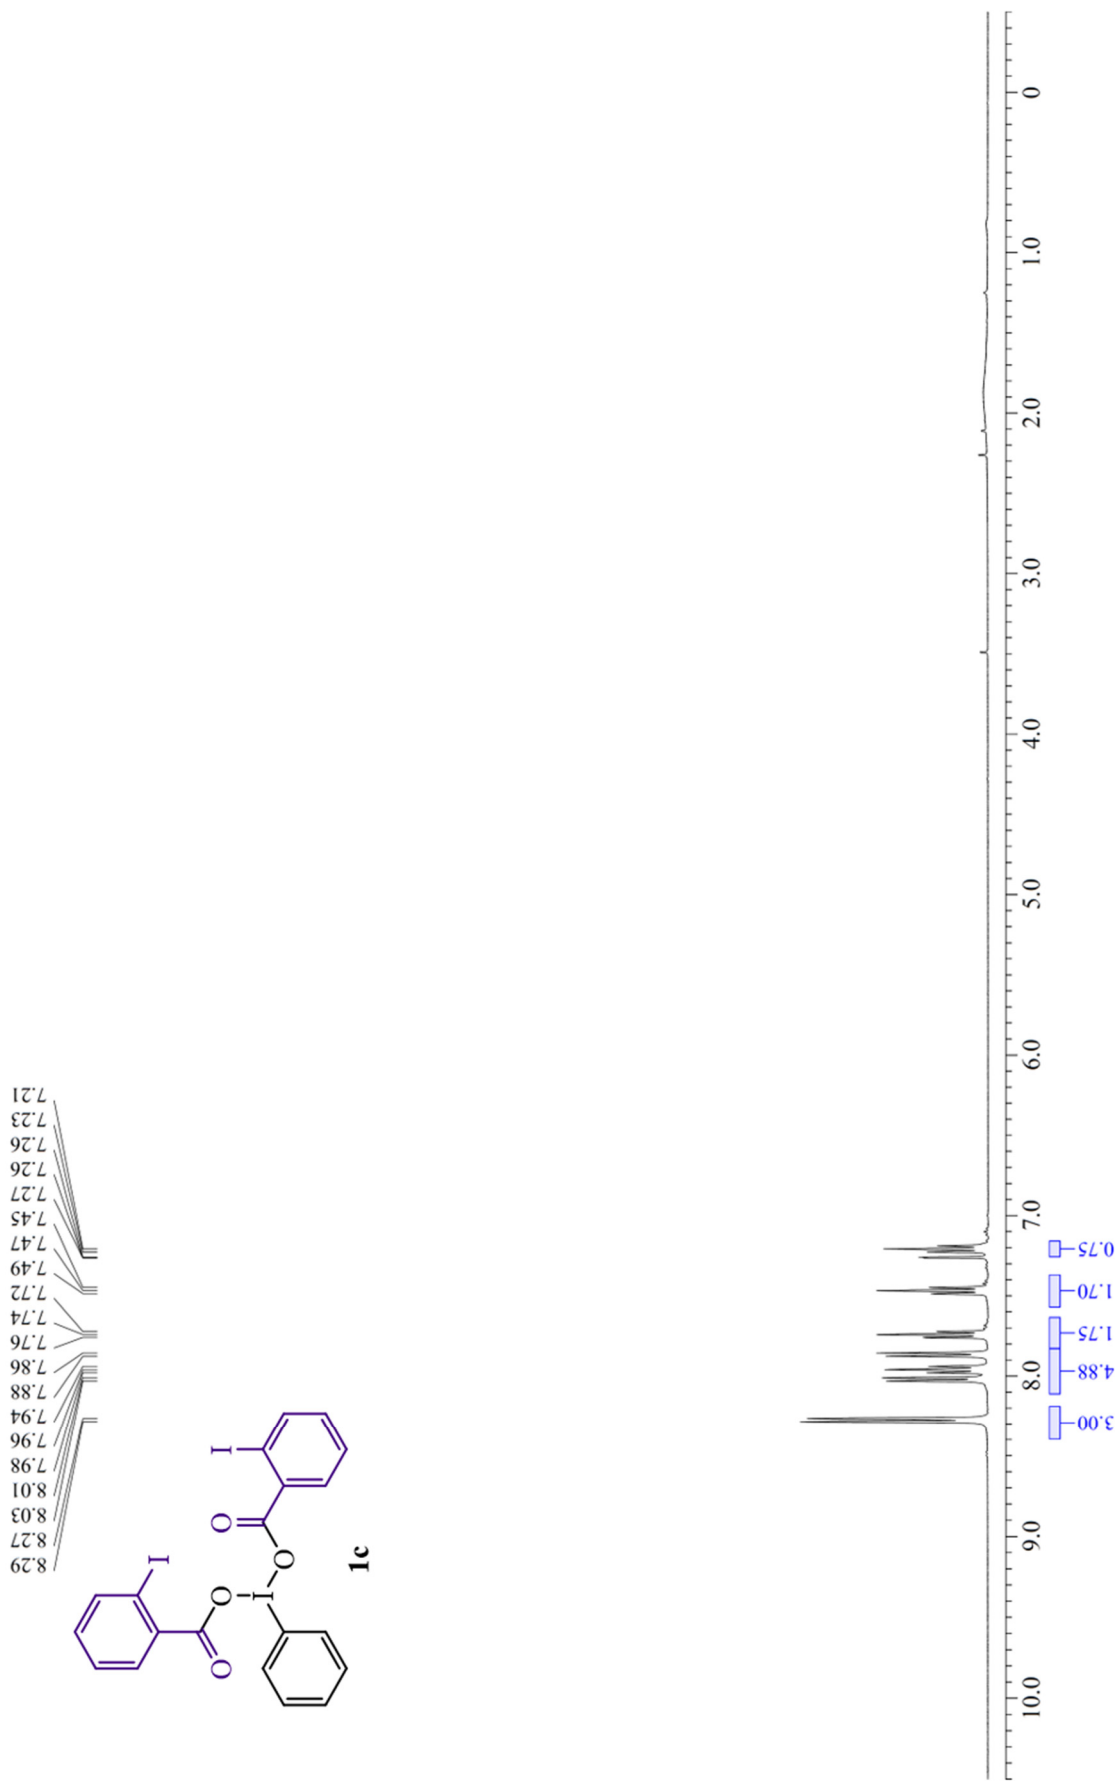

$^1\text{H}$  NMR spectrum of compound **1c** (400 MHz,  $\text{CDCl}_3$ )

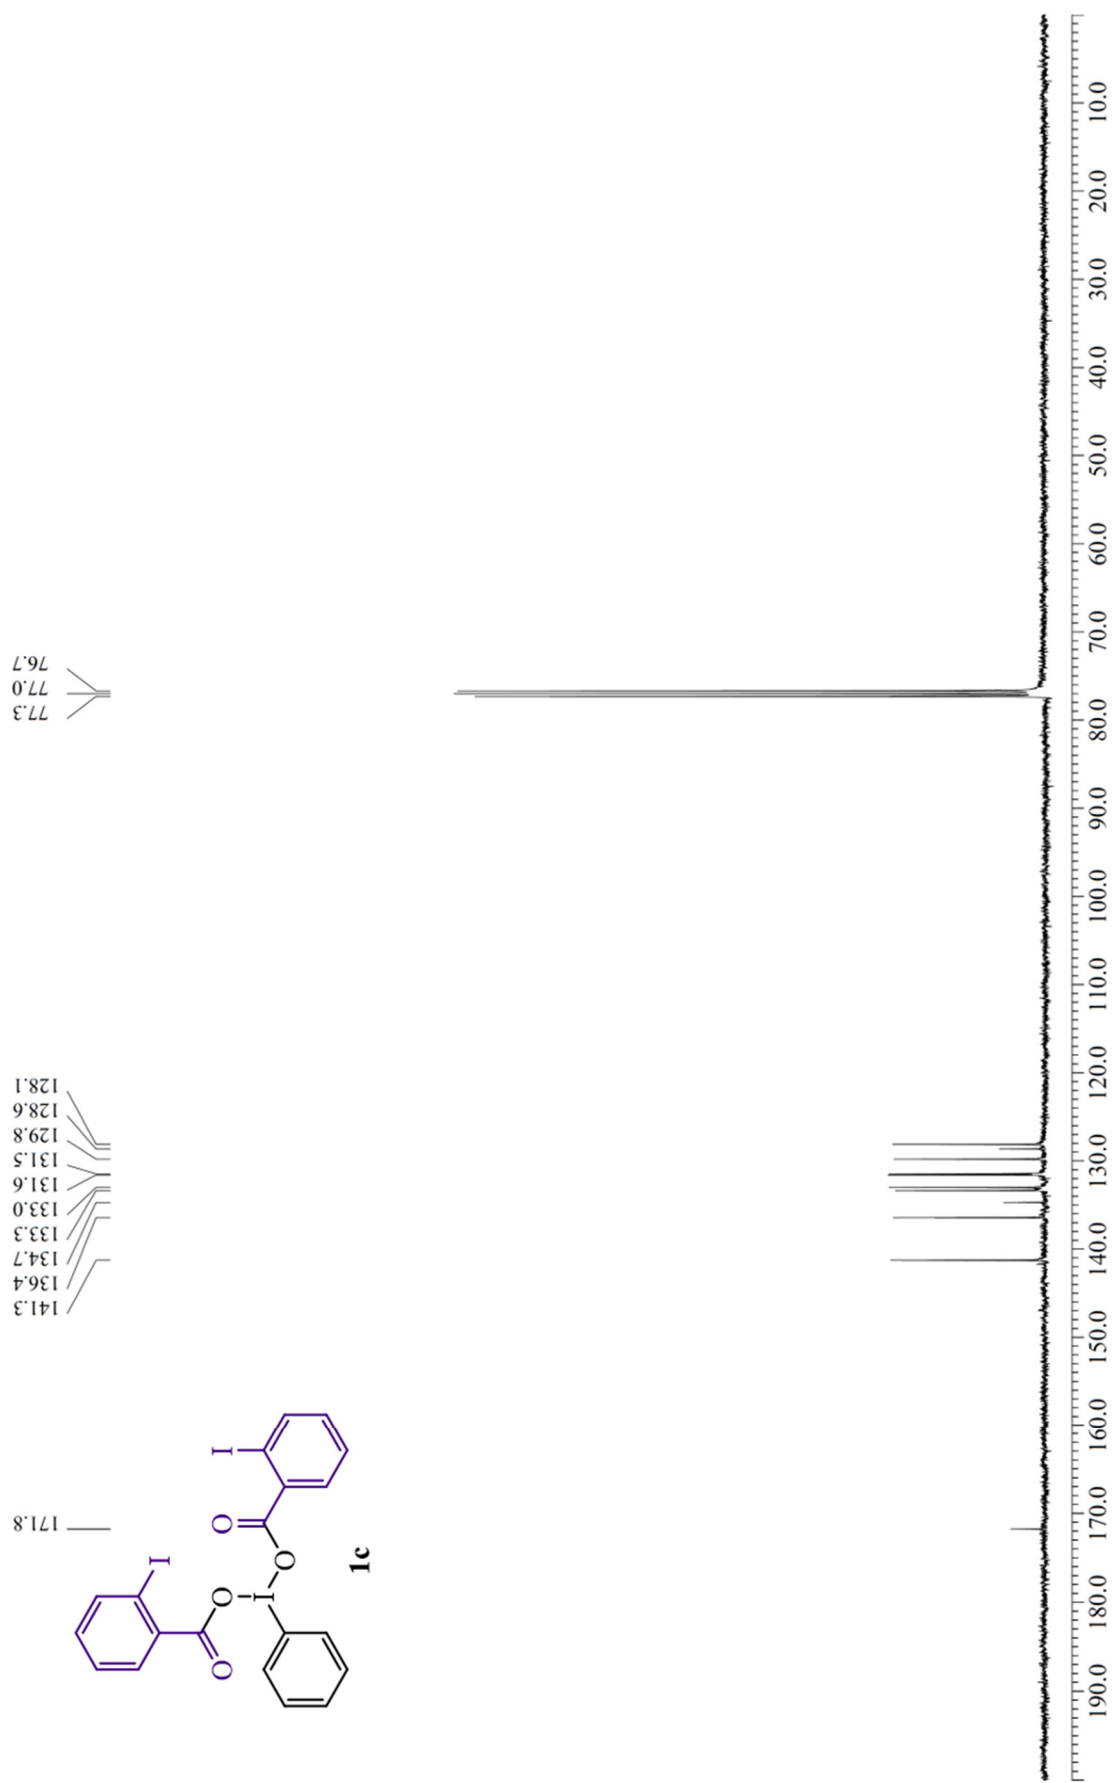

$^{13}\text{C}\{\text{H}\}$  NMR spectrum of compound **1c** (100 MHz,  $\text{CDCl}_3$ )



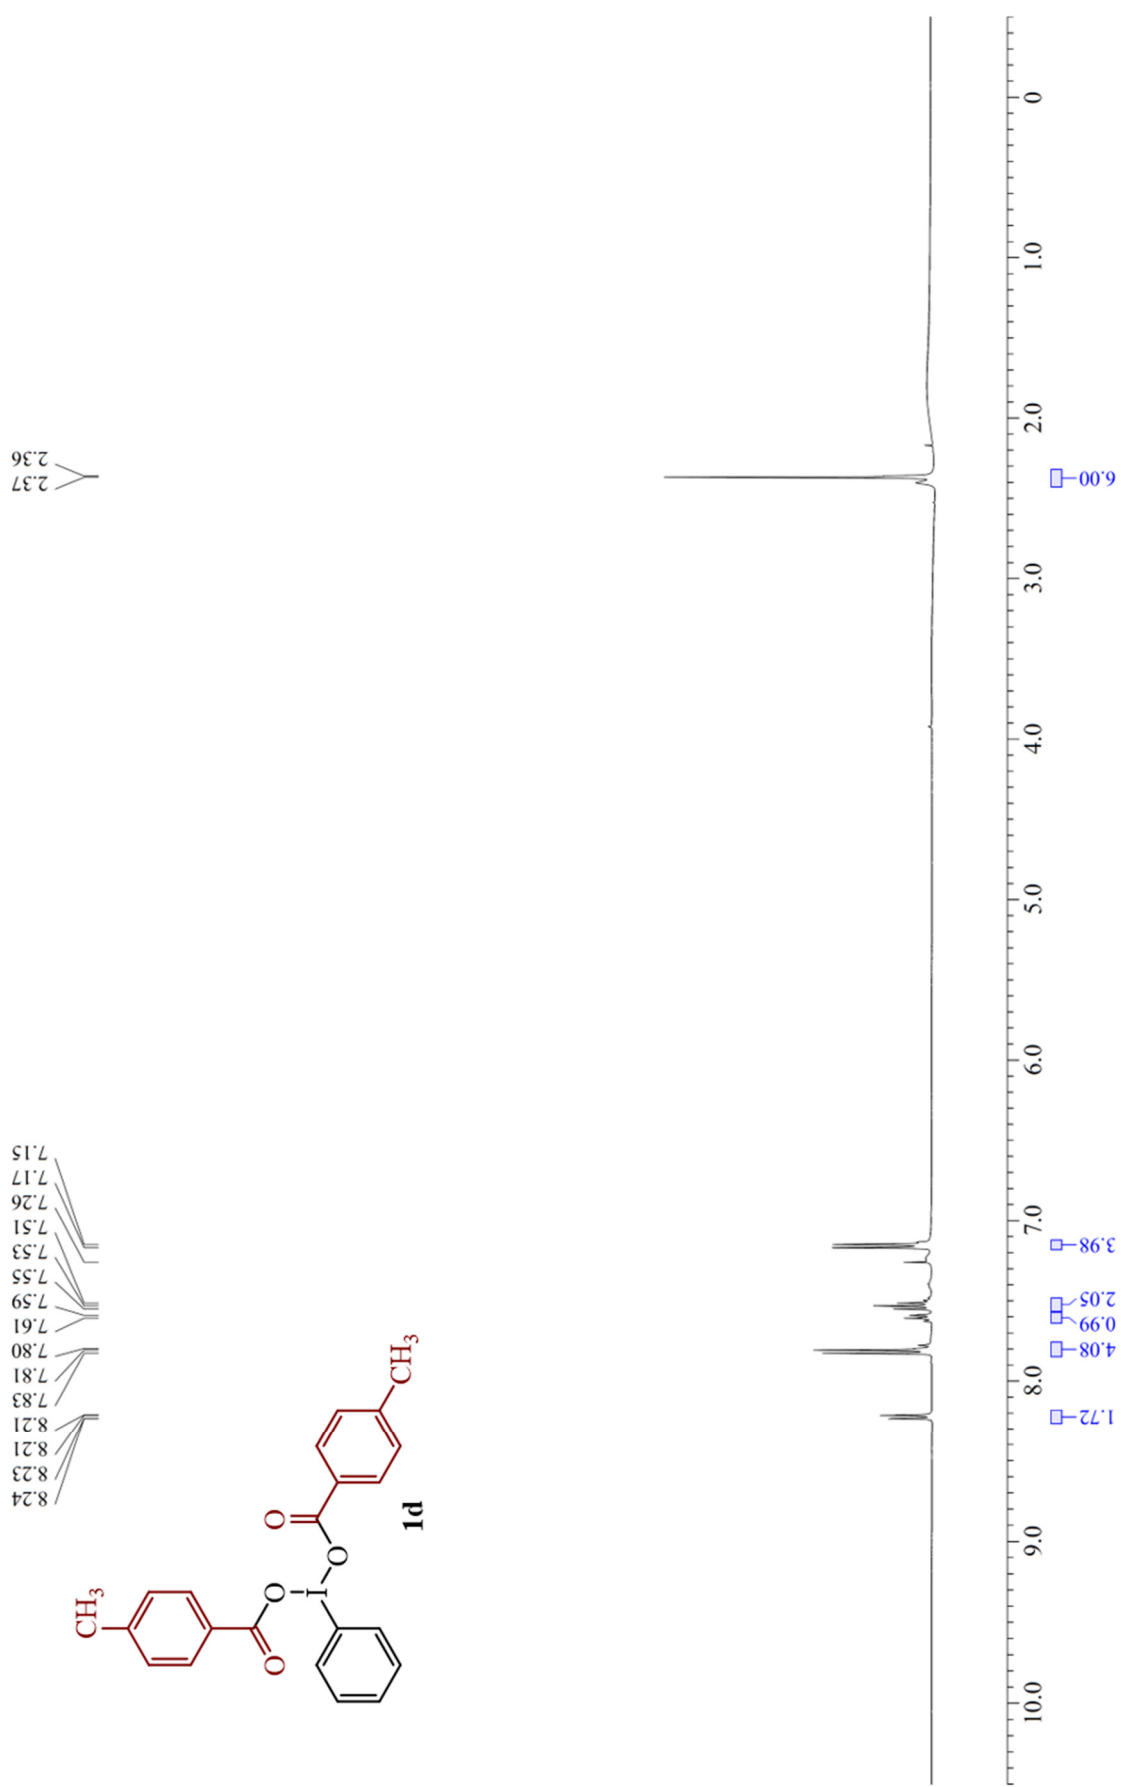

<sup>1</sup>H NMR spectrum of compound **1d** (400 MHz, CDCl<sub>3</sub>)

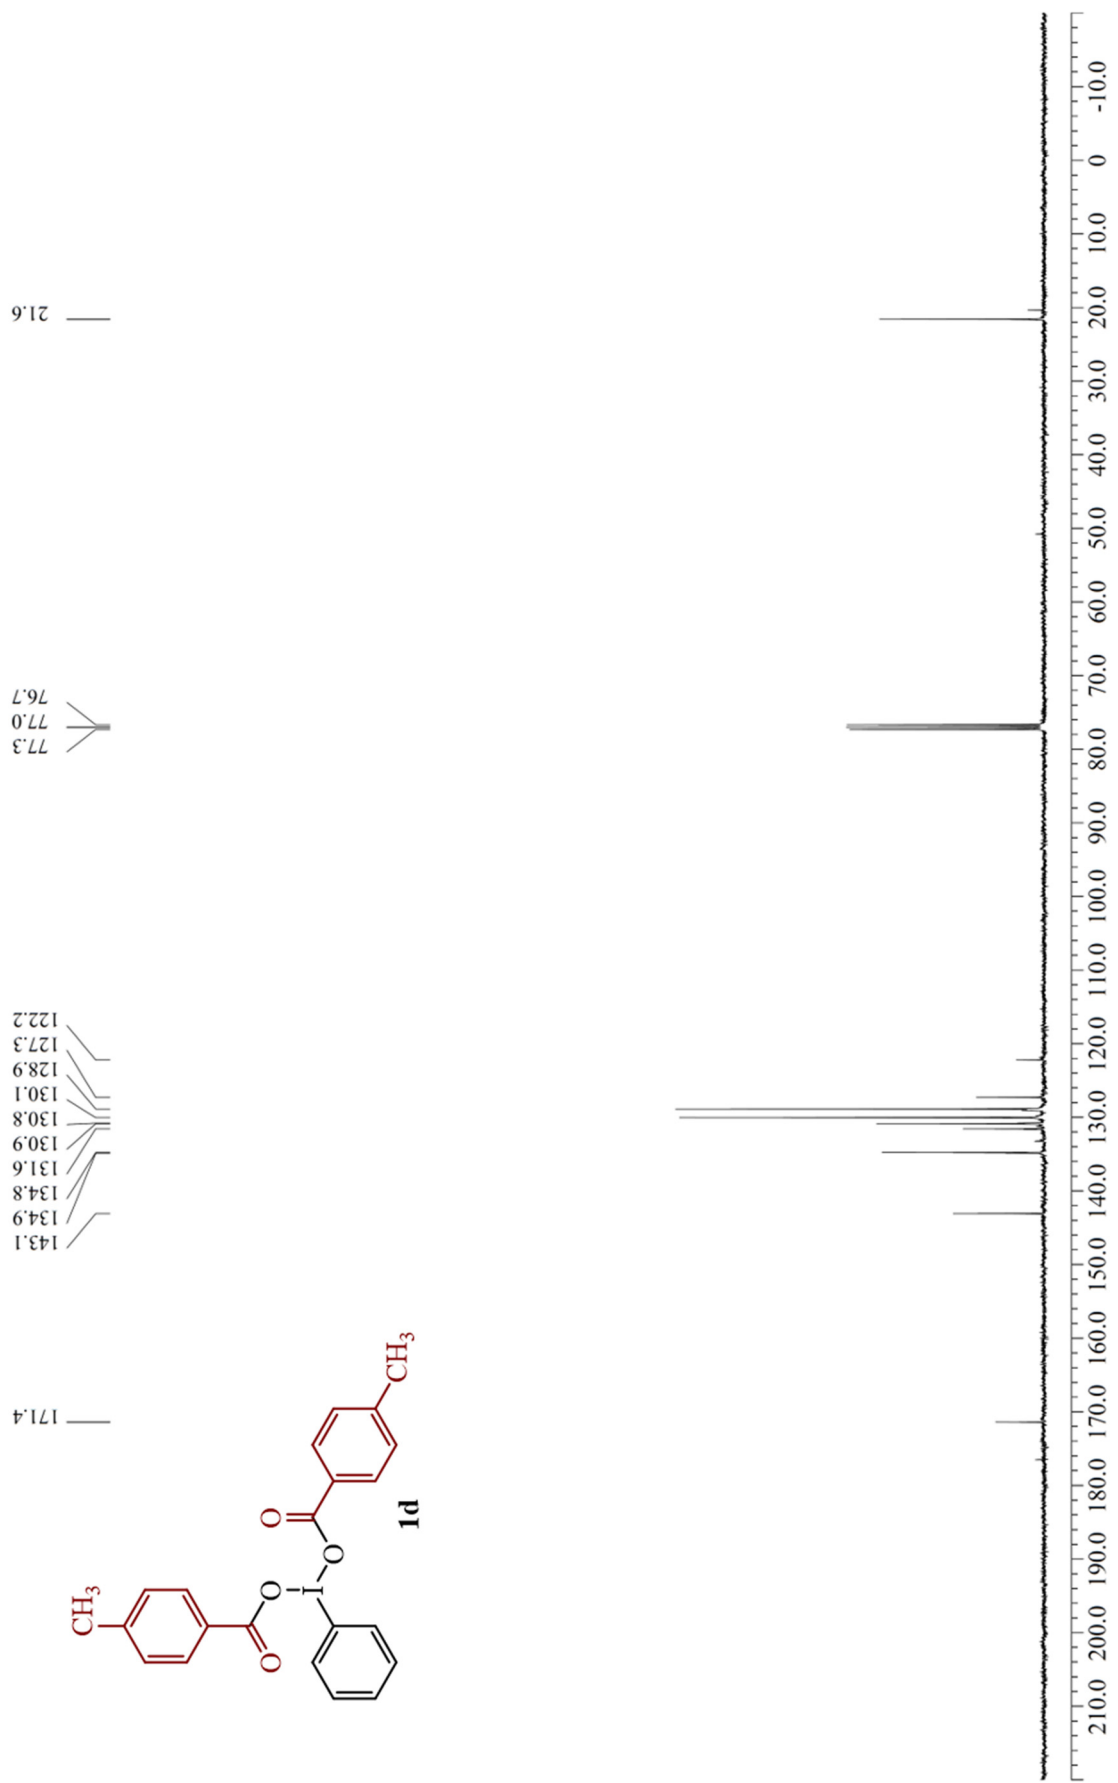

$^{13}\text{C}$  {H} NMR spectrum of compound **1d** (100 MHz,  $\text{CDCl}_3$ )

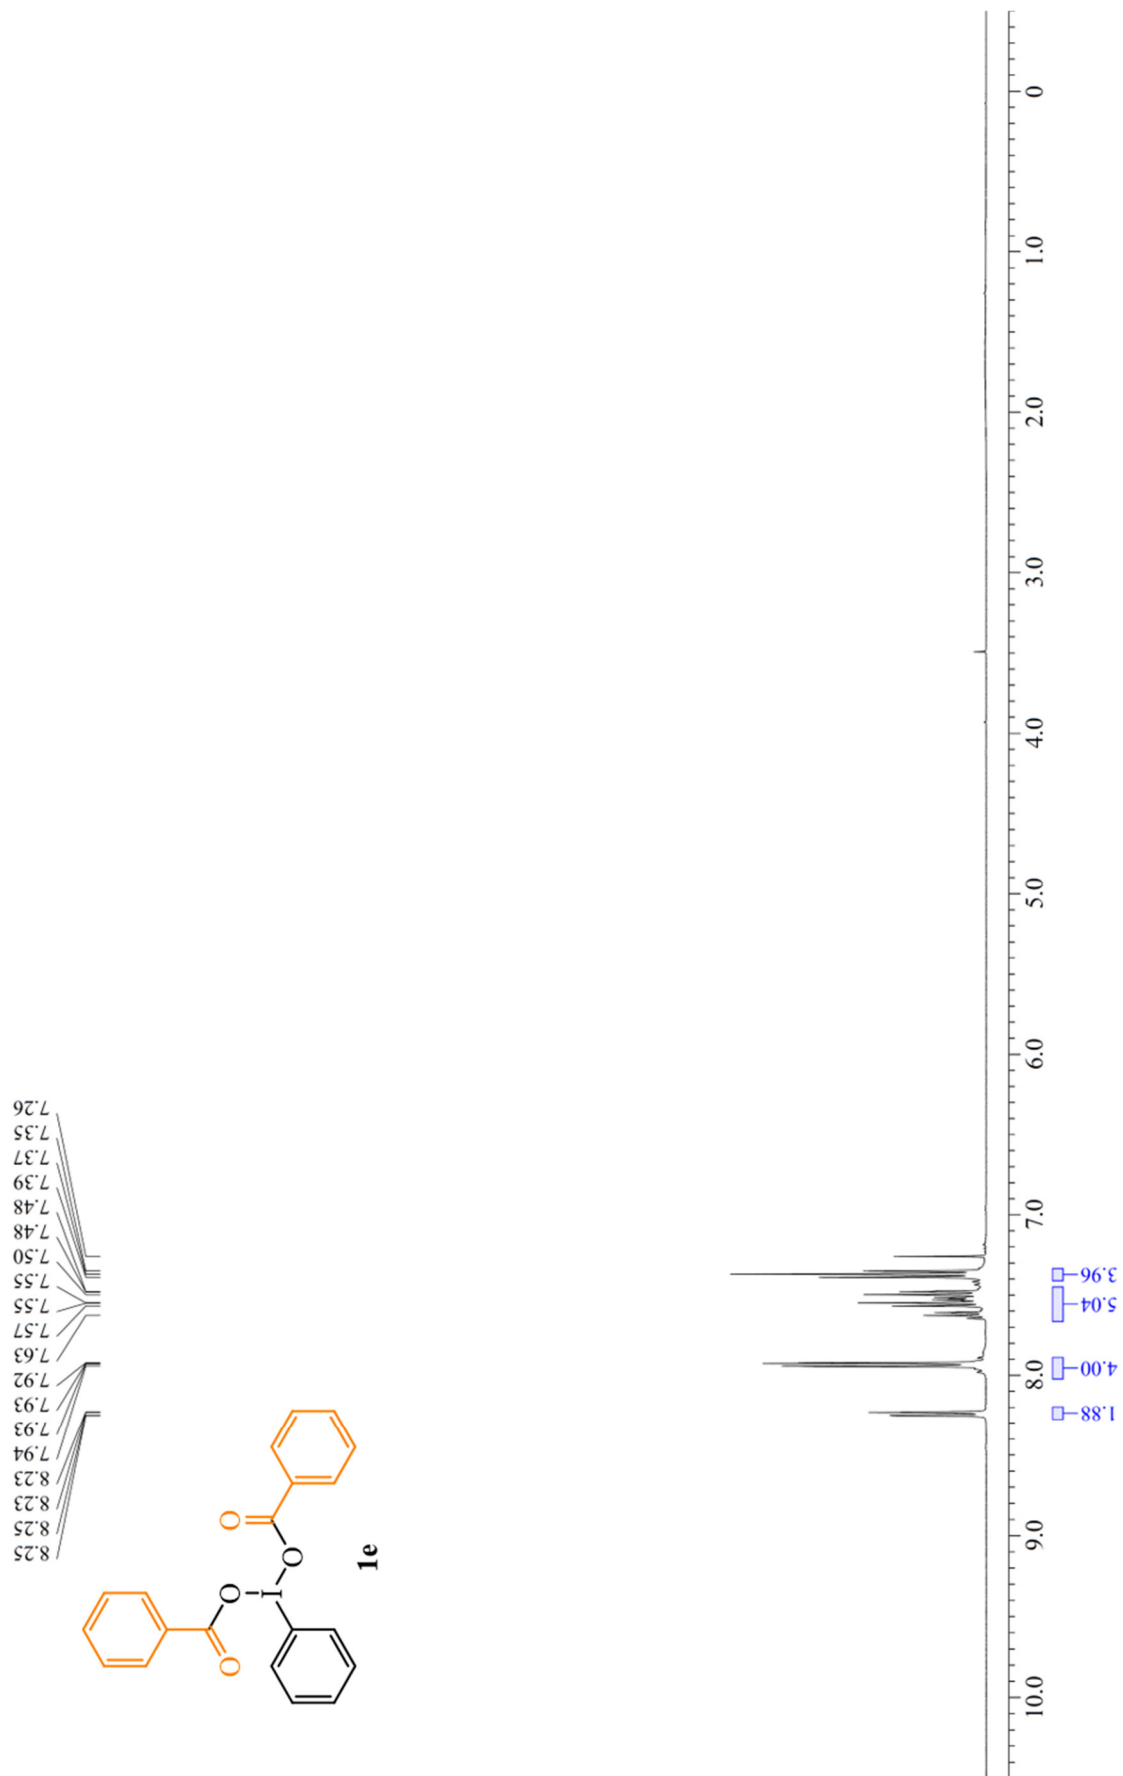

<sup>1</sup>H NMR spectrum of compound **1e** (400 MHz, CDCl<sub>3</sub>)

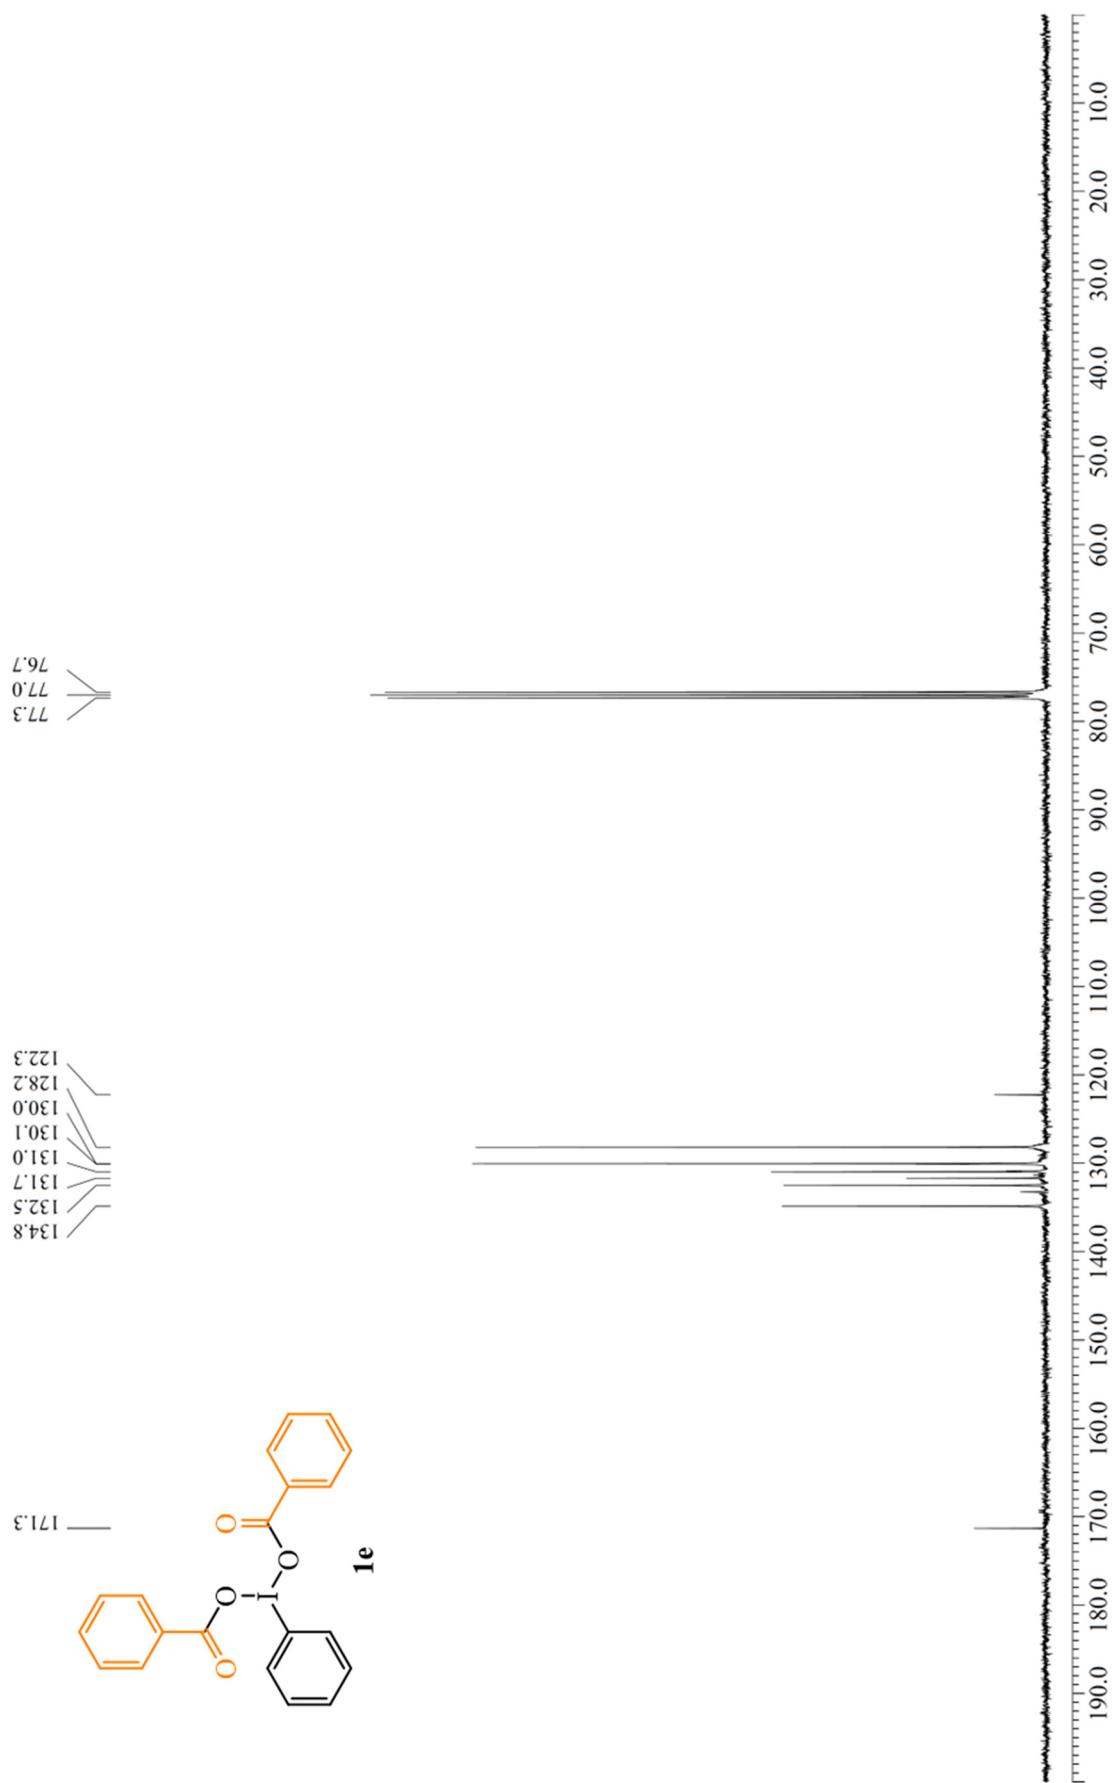

$^{13}\text{C}\{\text{H}\}$  NMR spectrum of compound **1e** (100 MHz,  $\text{CDCl}_3$ )

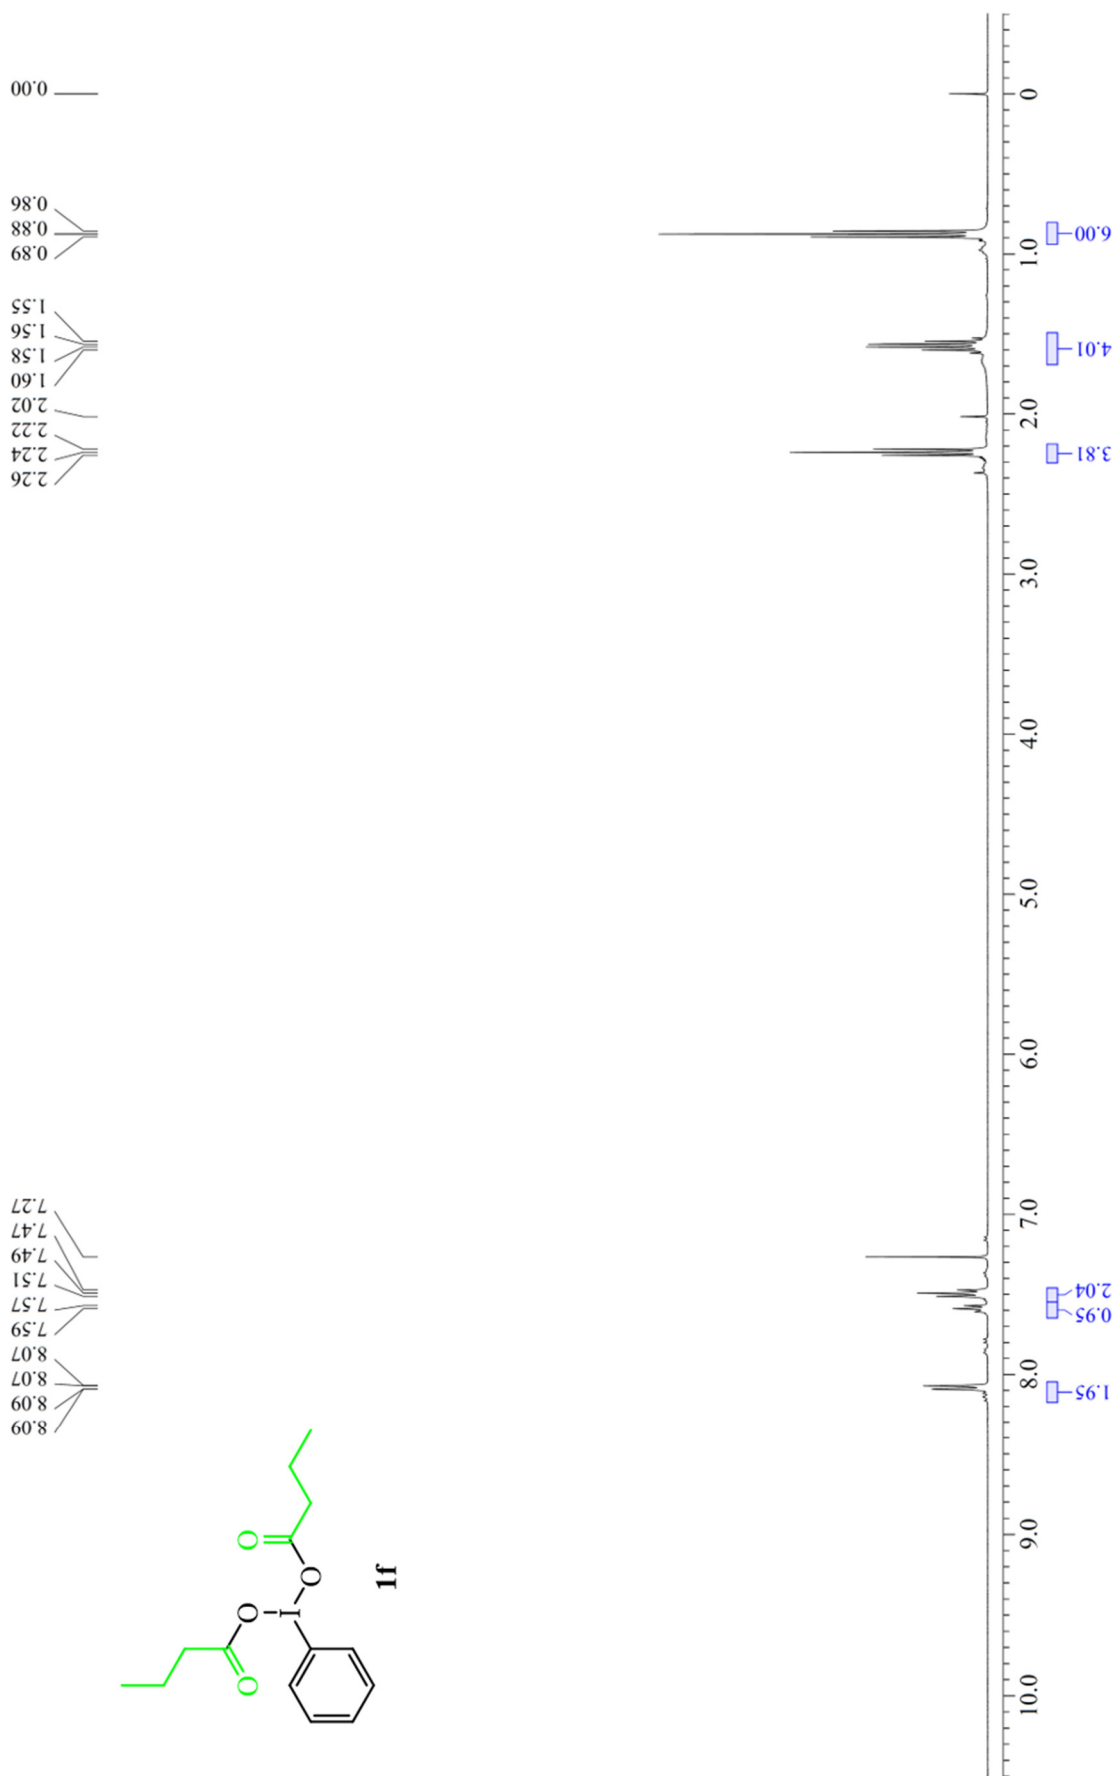

<sup>1</sup>H NMR spectrum of compound **1f** (400 MHz, CDCl<sub>3</sub>)

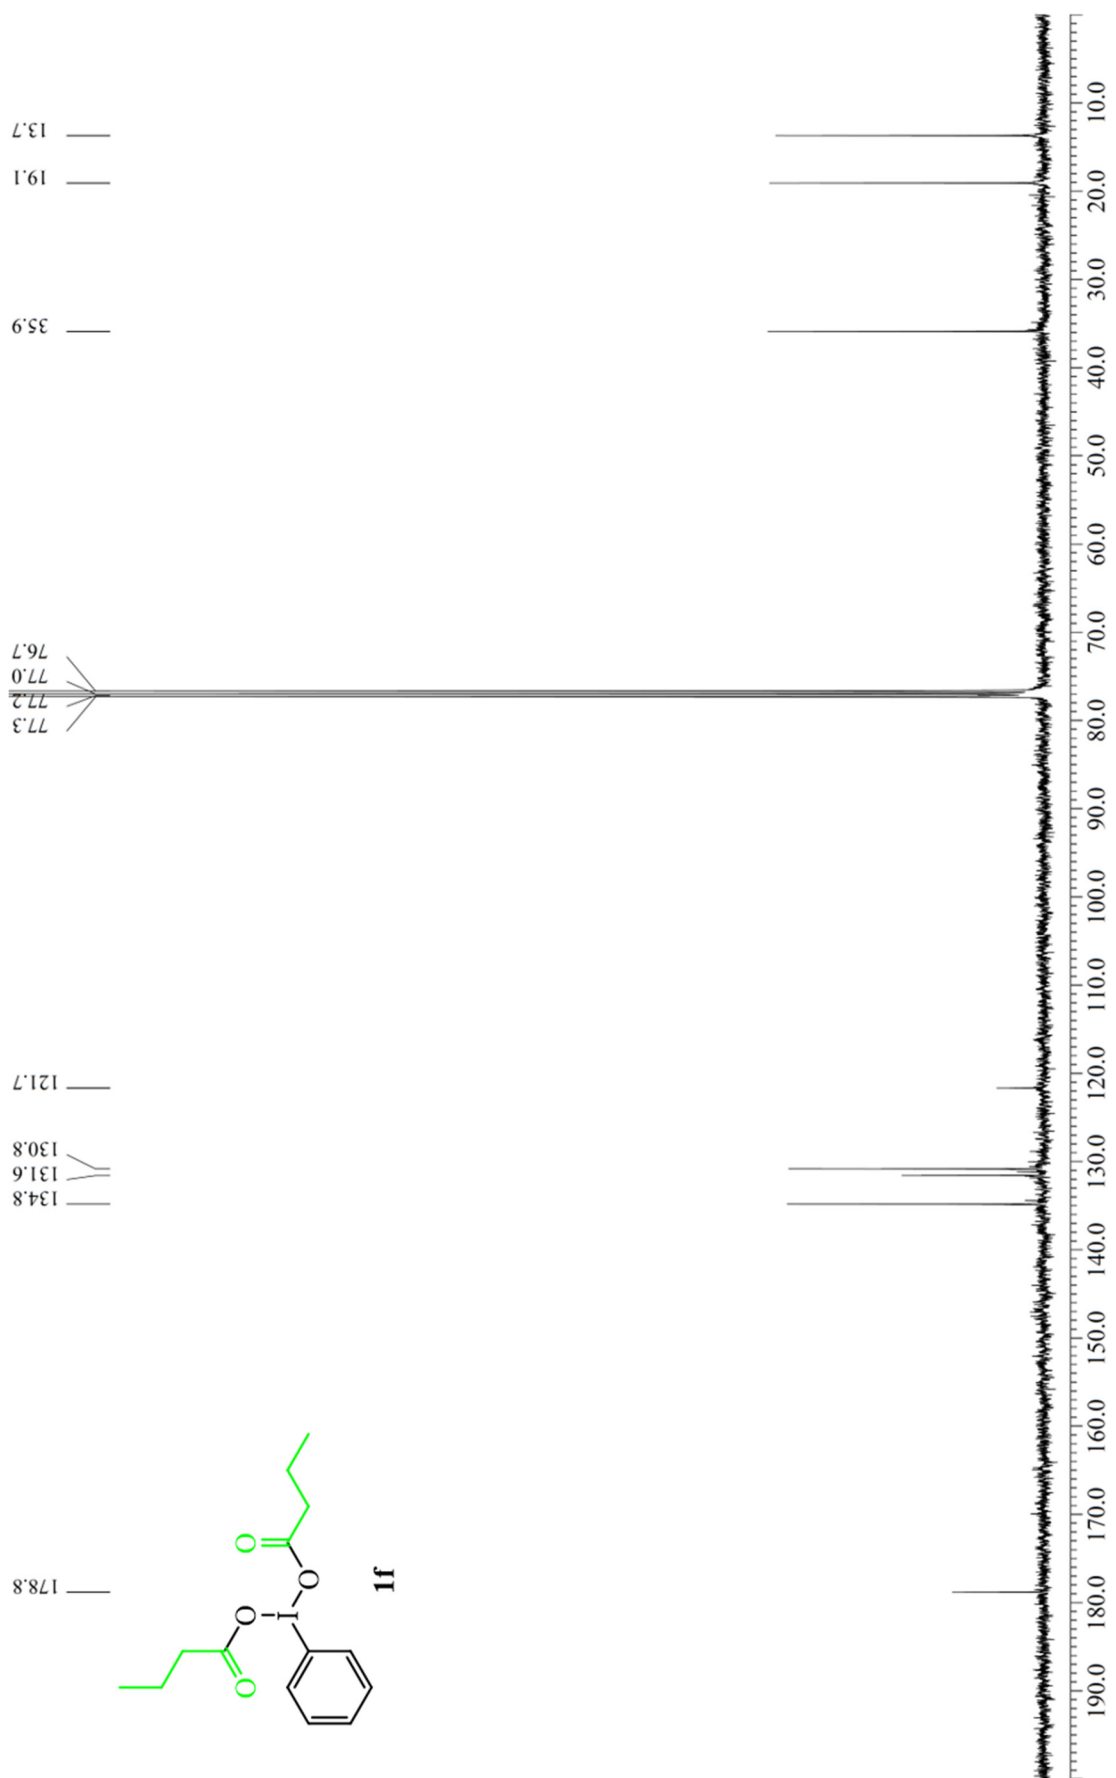

$^{13}\text{C}\{^1\text{H}\}$  NMR spectrum of compound **1f** (100 MHz,  $\text{CDCl}_3$ )

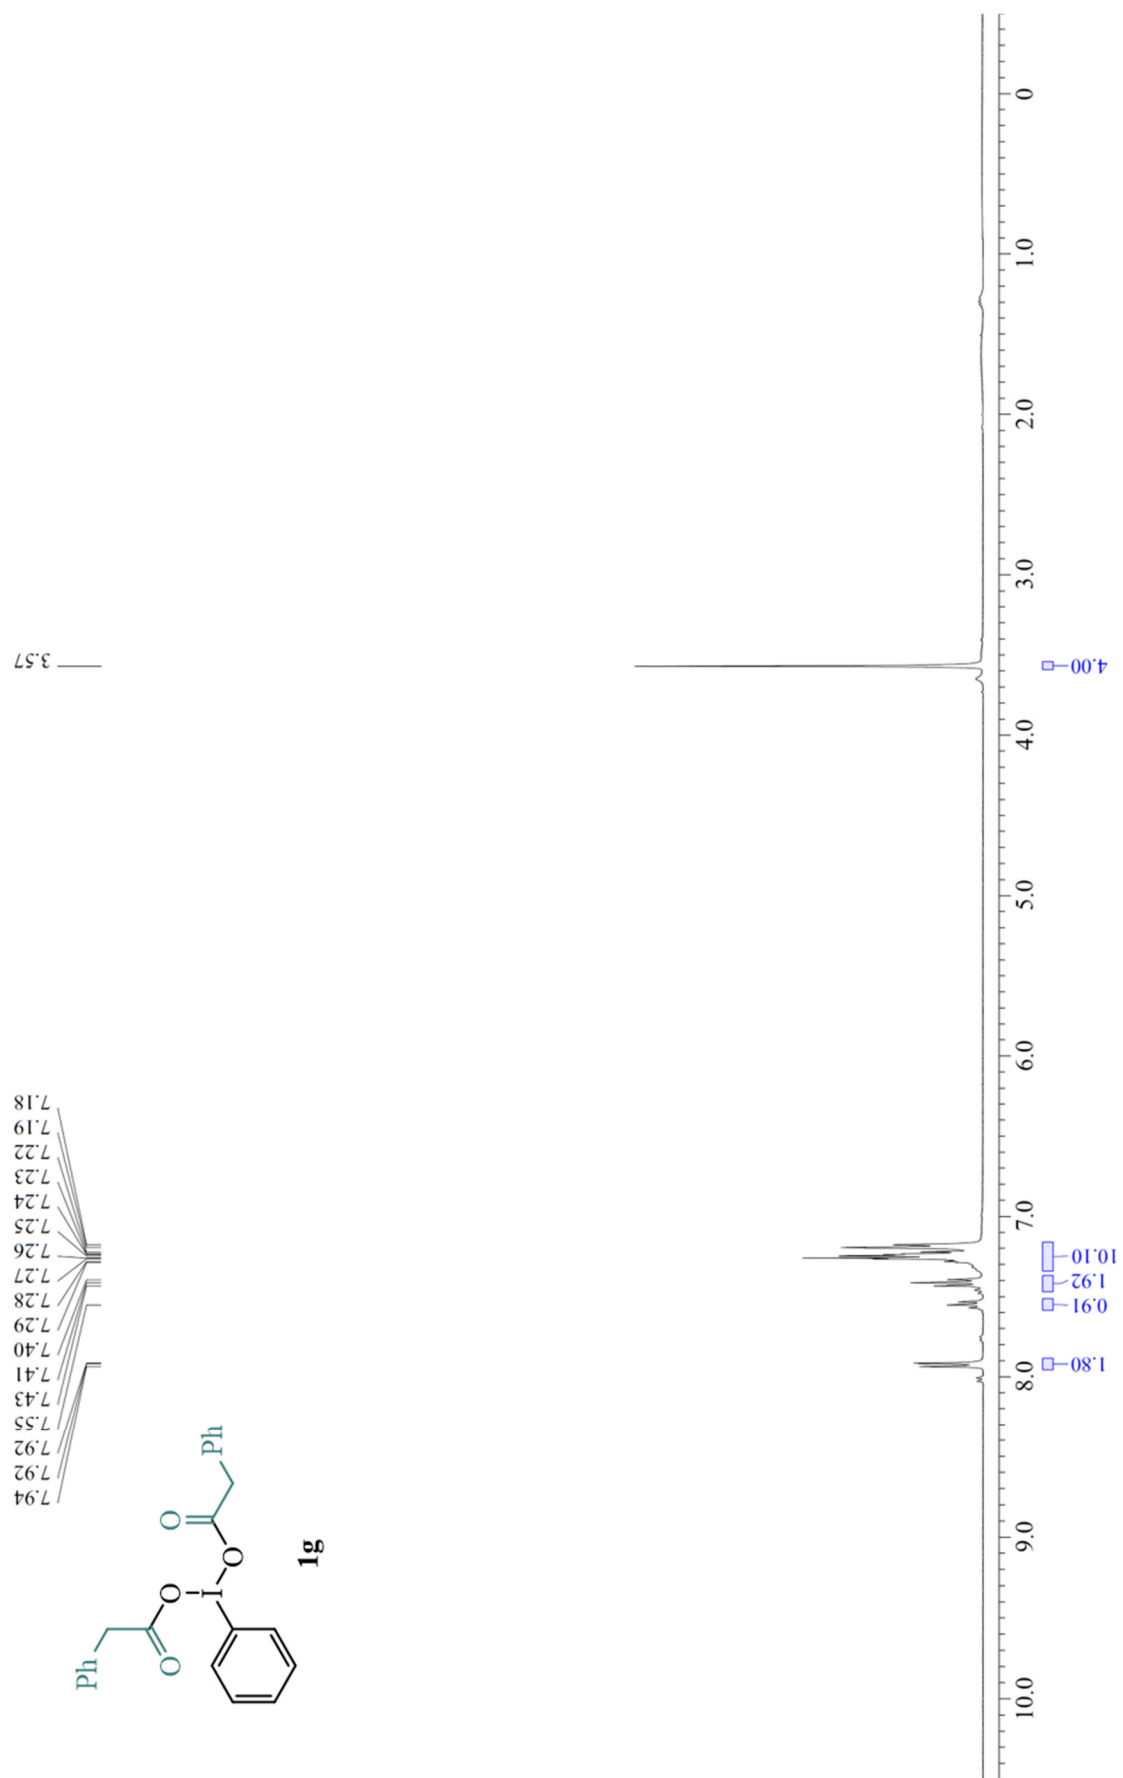

$^1\text{H}$  NMR spectrum of compound **1g** (400 MHz,  $\text{CDCl}_3$ )

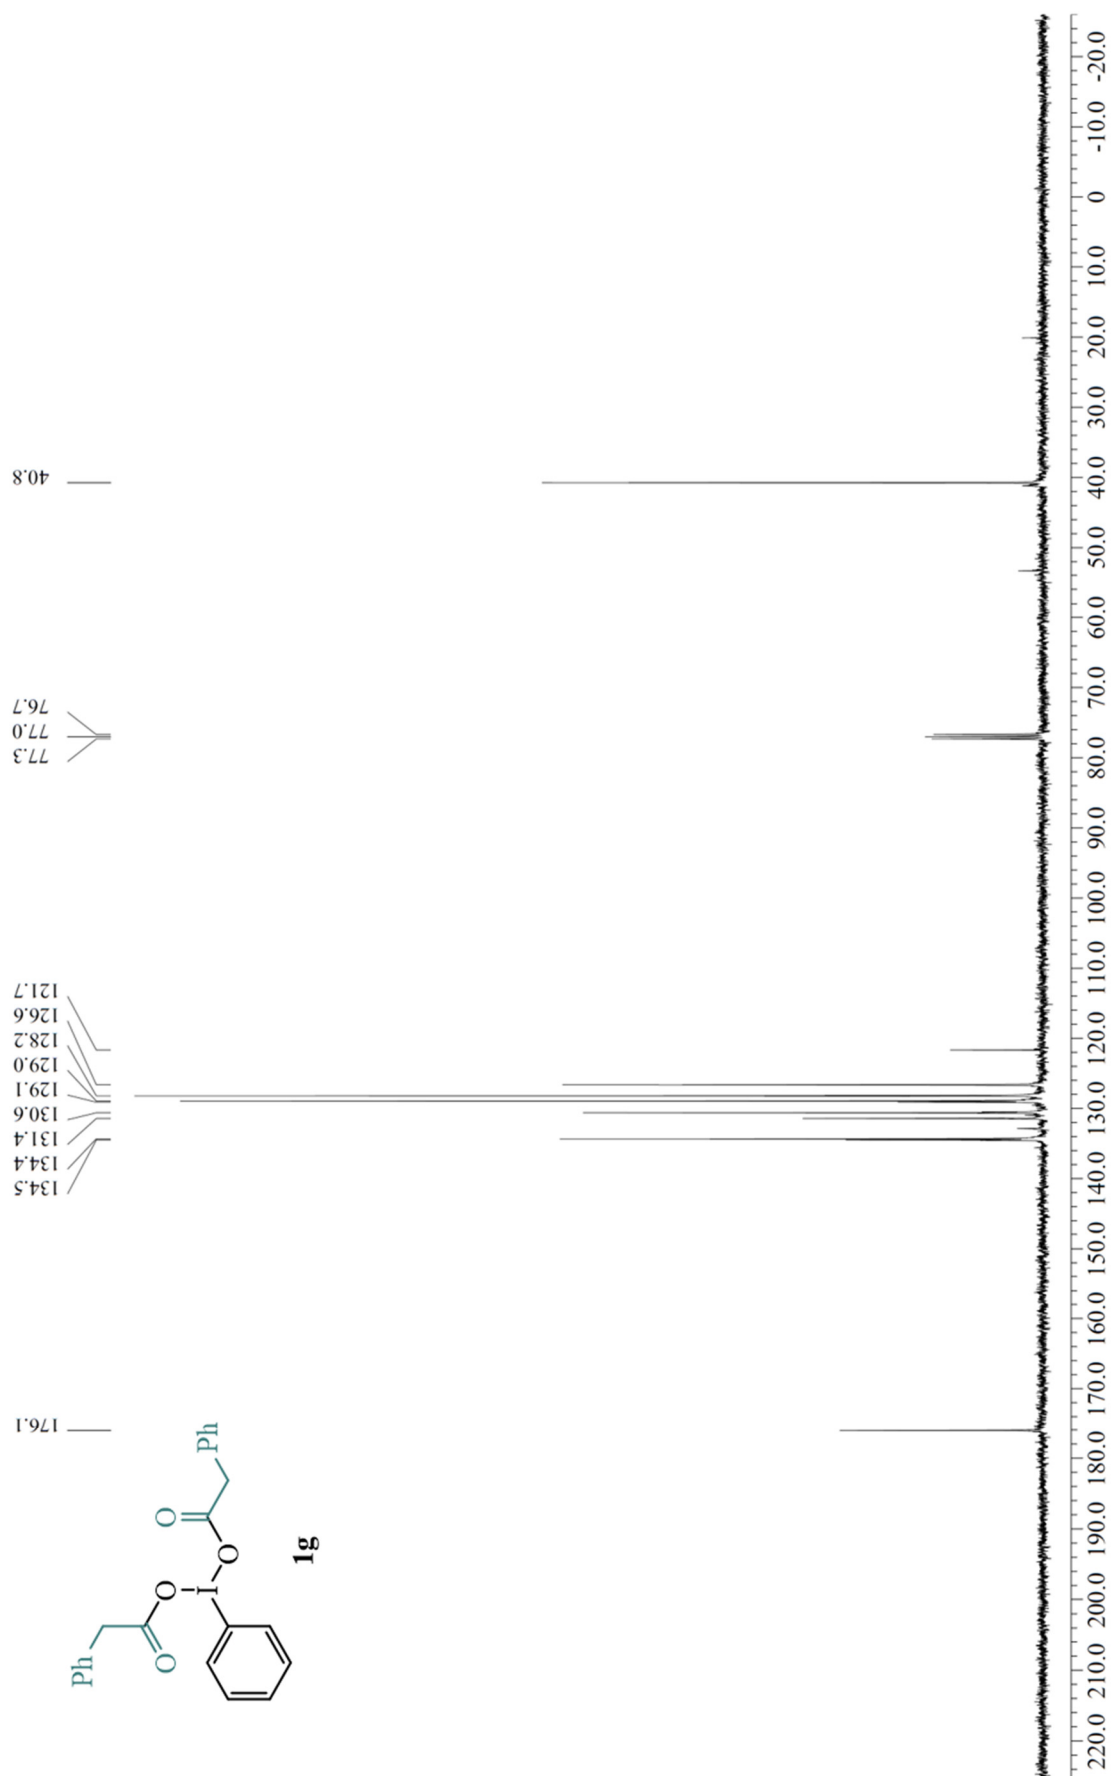

<sup>13</sup>C{H} NMR spectrum of compound **1g** (100 MHz, CDCl<sub>3</sub>)



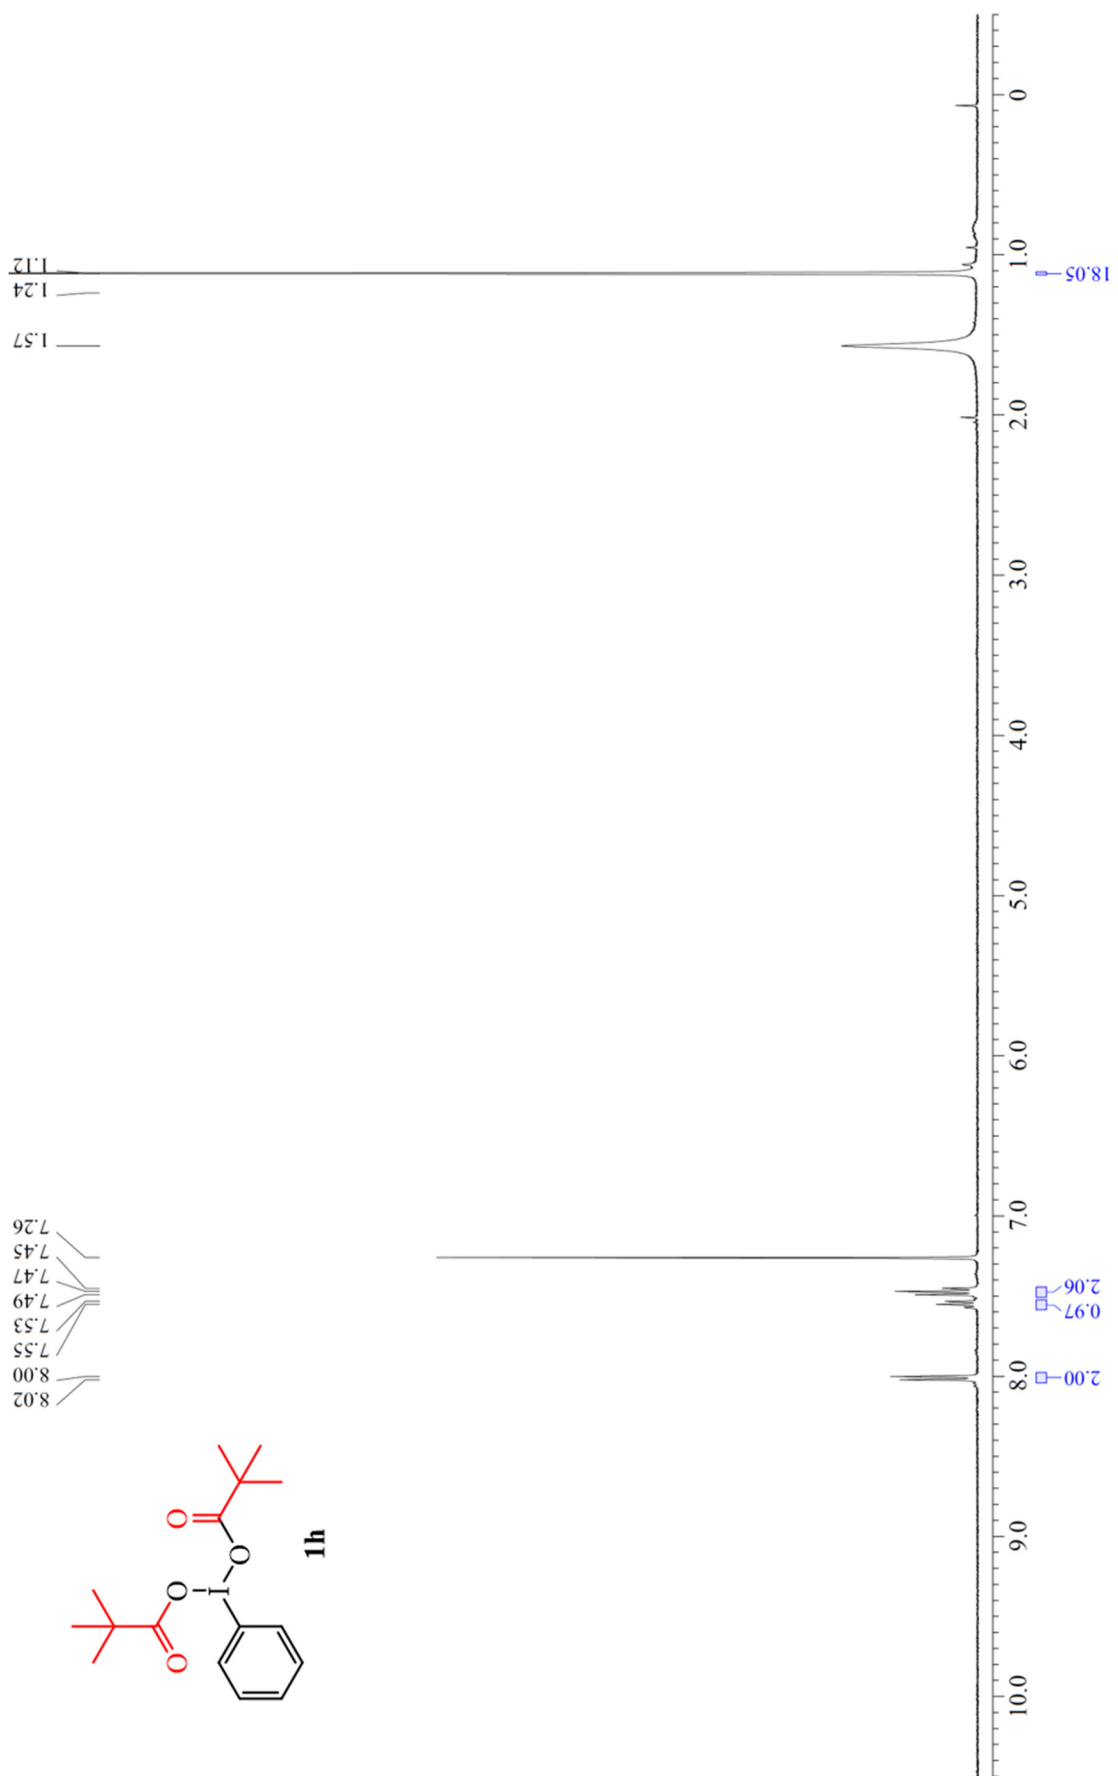

$^1\text{H}$  NMR spectrum of compound **1h** (400 MHz,  $\text{CDCl}_3$ )

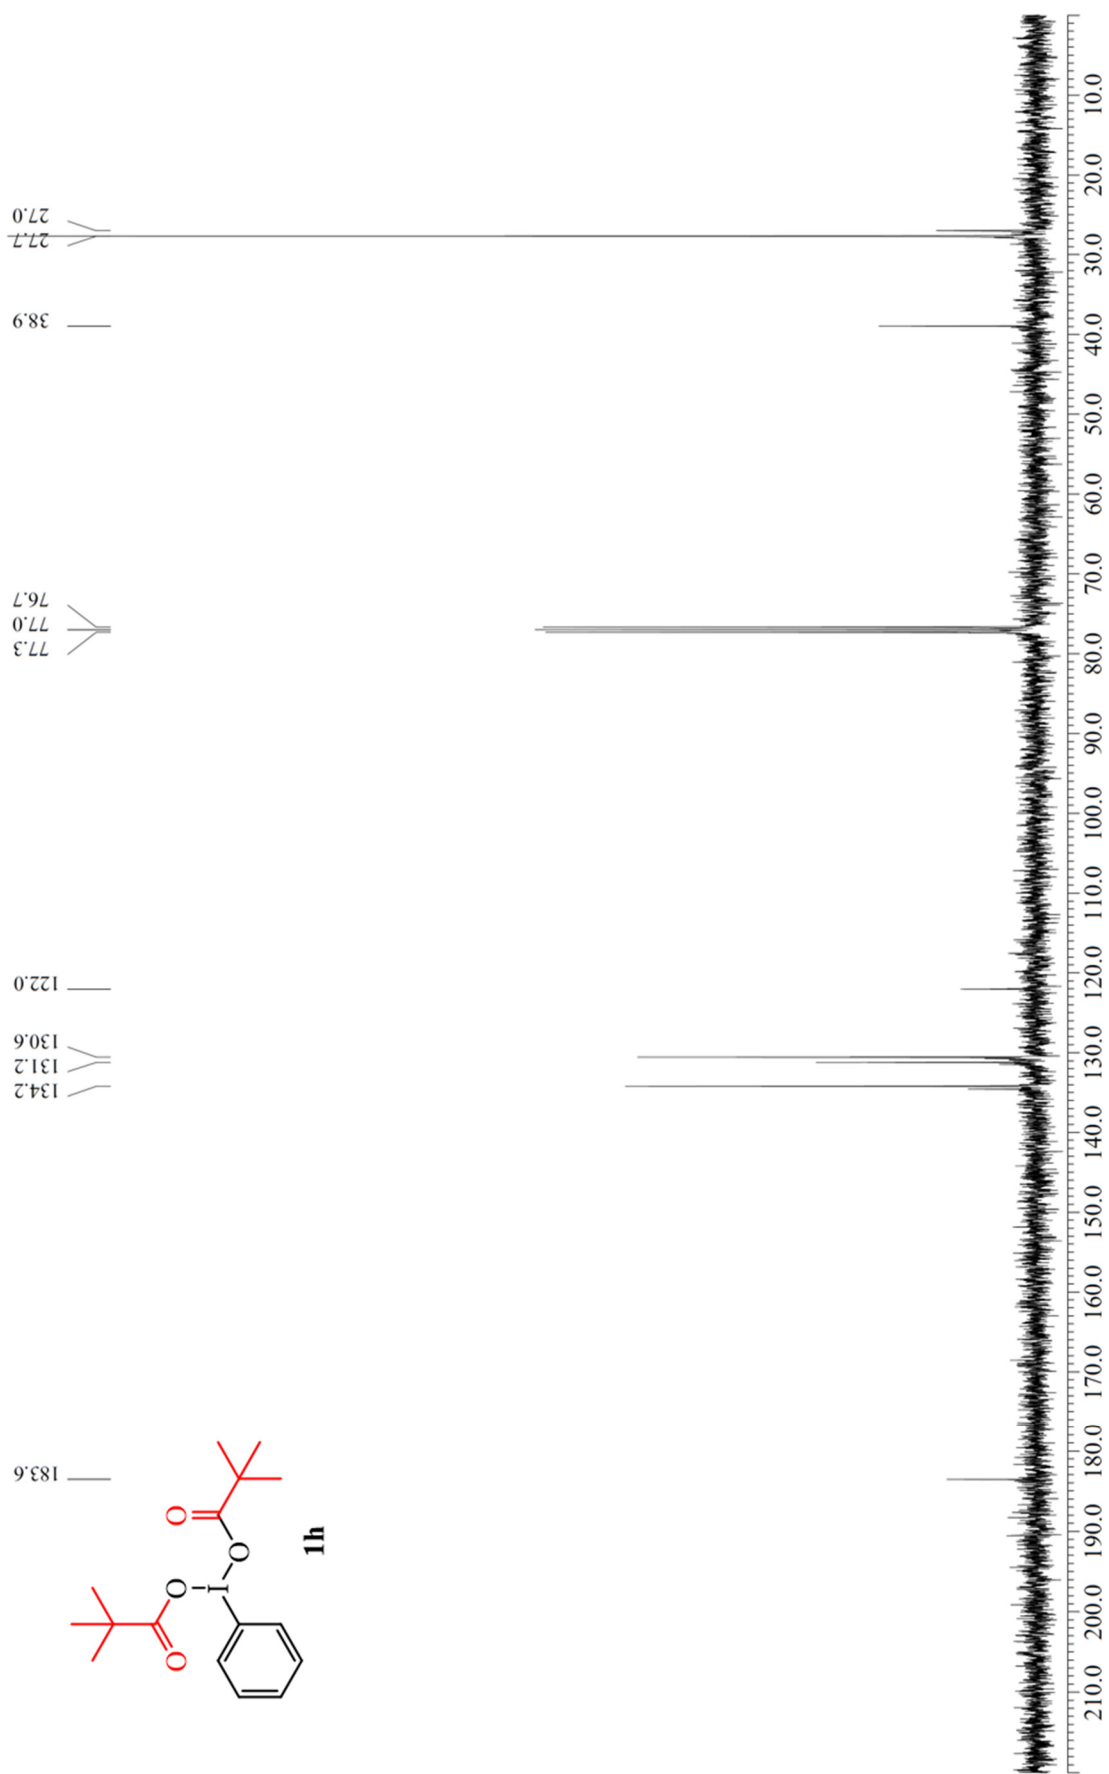

<sup>13</sup>C {H} NMR spectrum of compound **1h** (100 MHz, CDCl<sub>3</sub>)

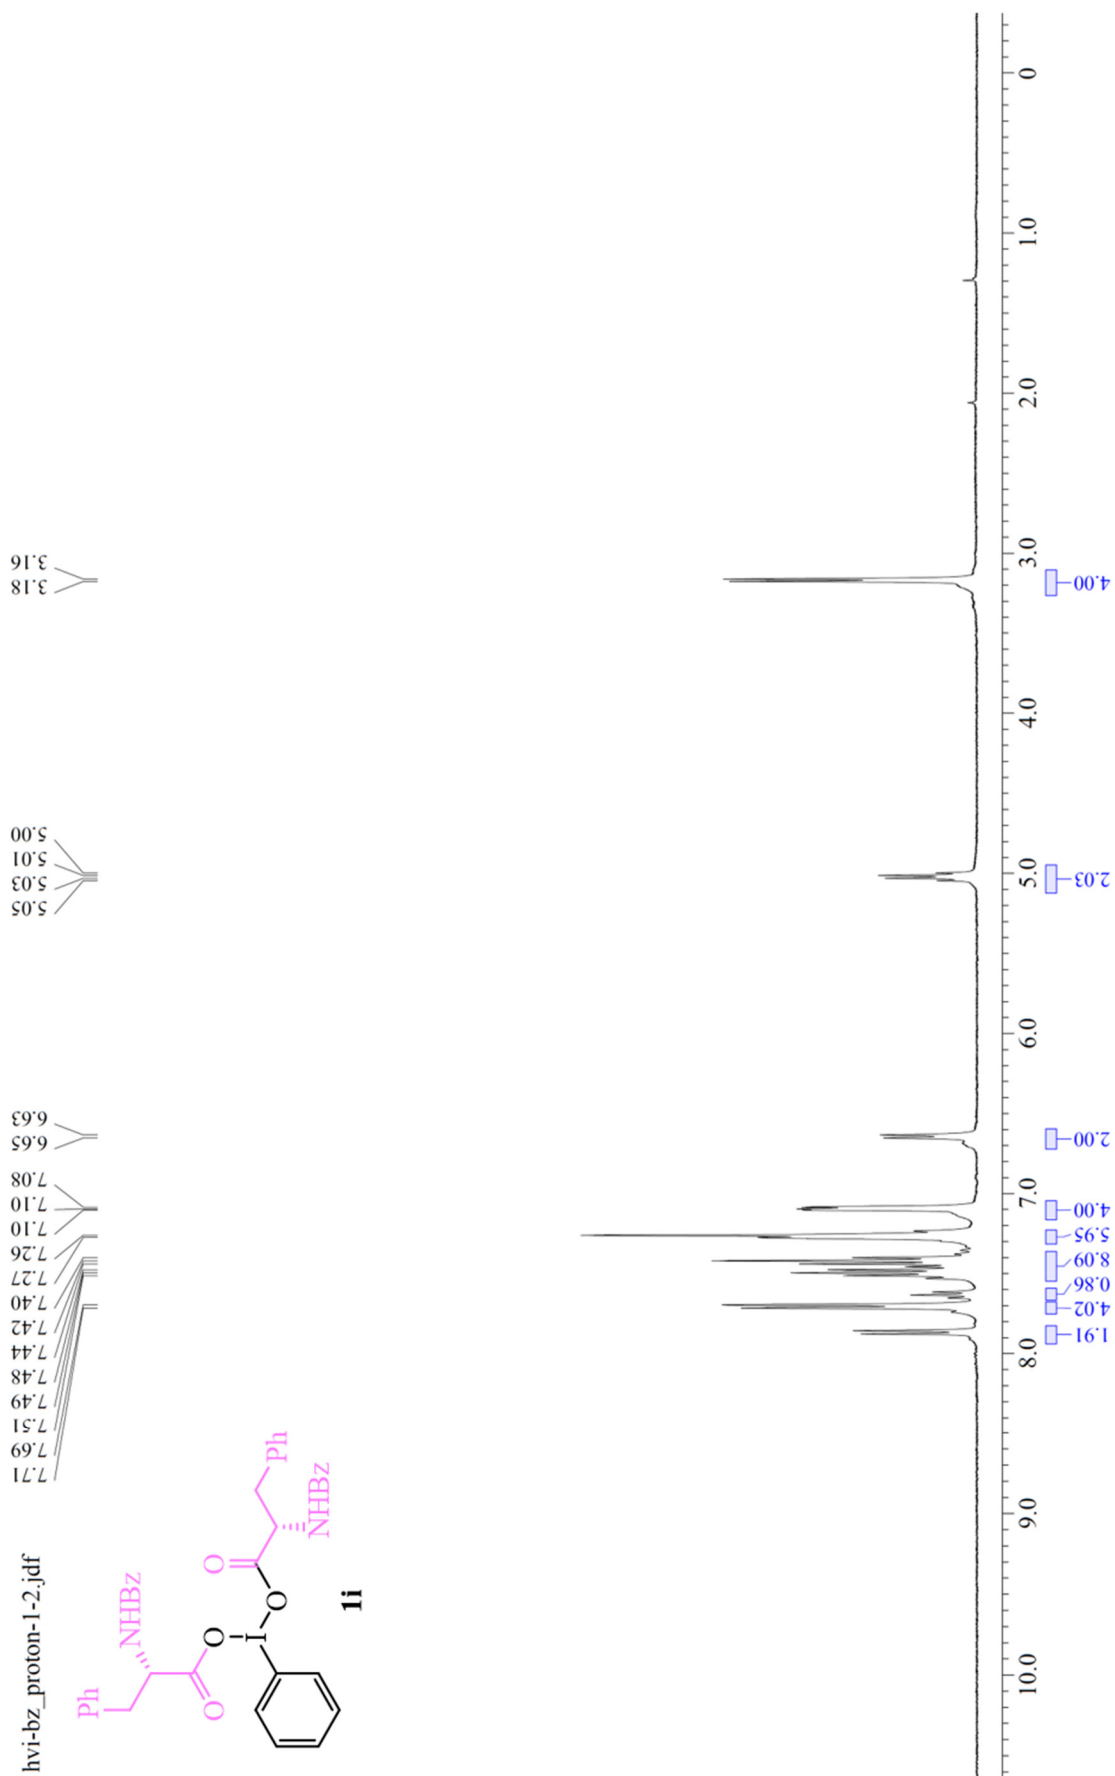

$^1\text{H}$  NMR spectrum of compound **1i** (400 MHz,  $\text{CDCl}_3$ )

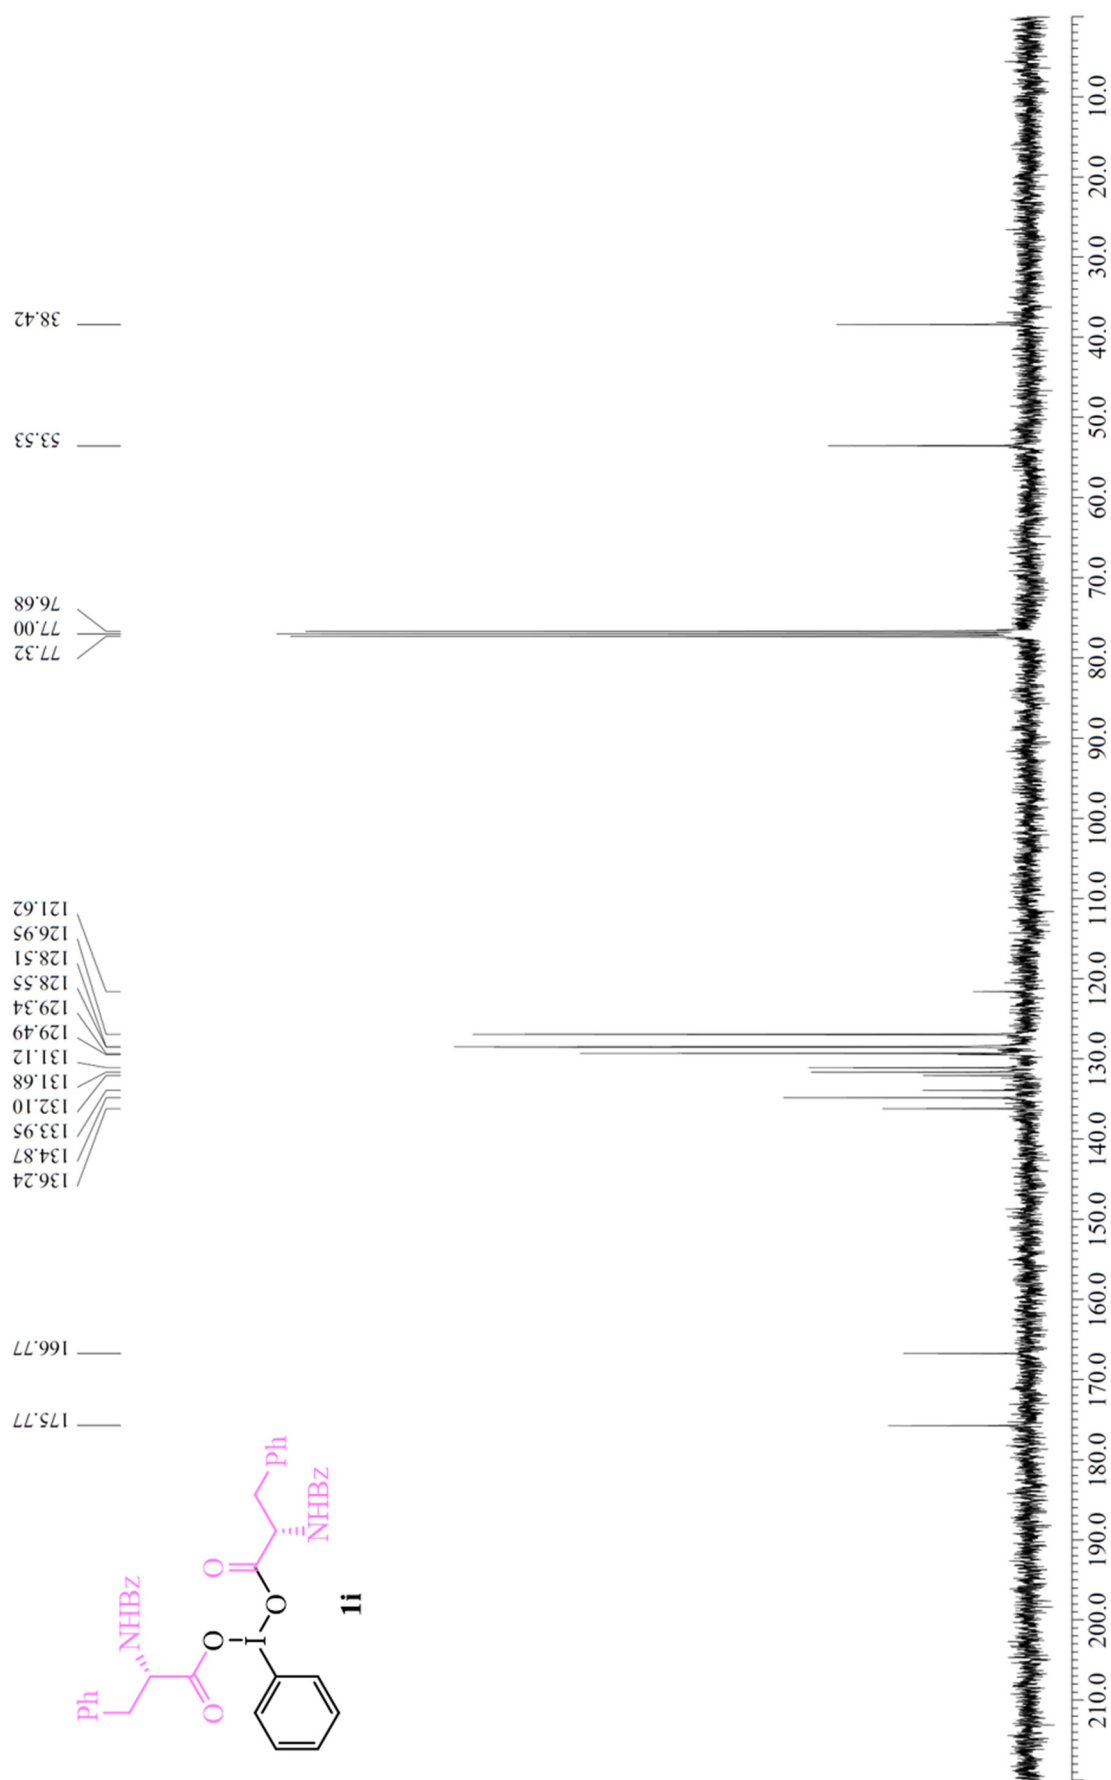

**<sup>13</sup>C{H} NMR spectrum of compound **1i** (100 MHz, CDCl<sub>3</sub>)**

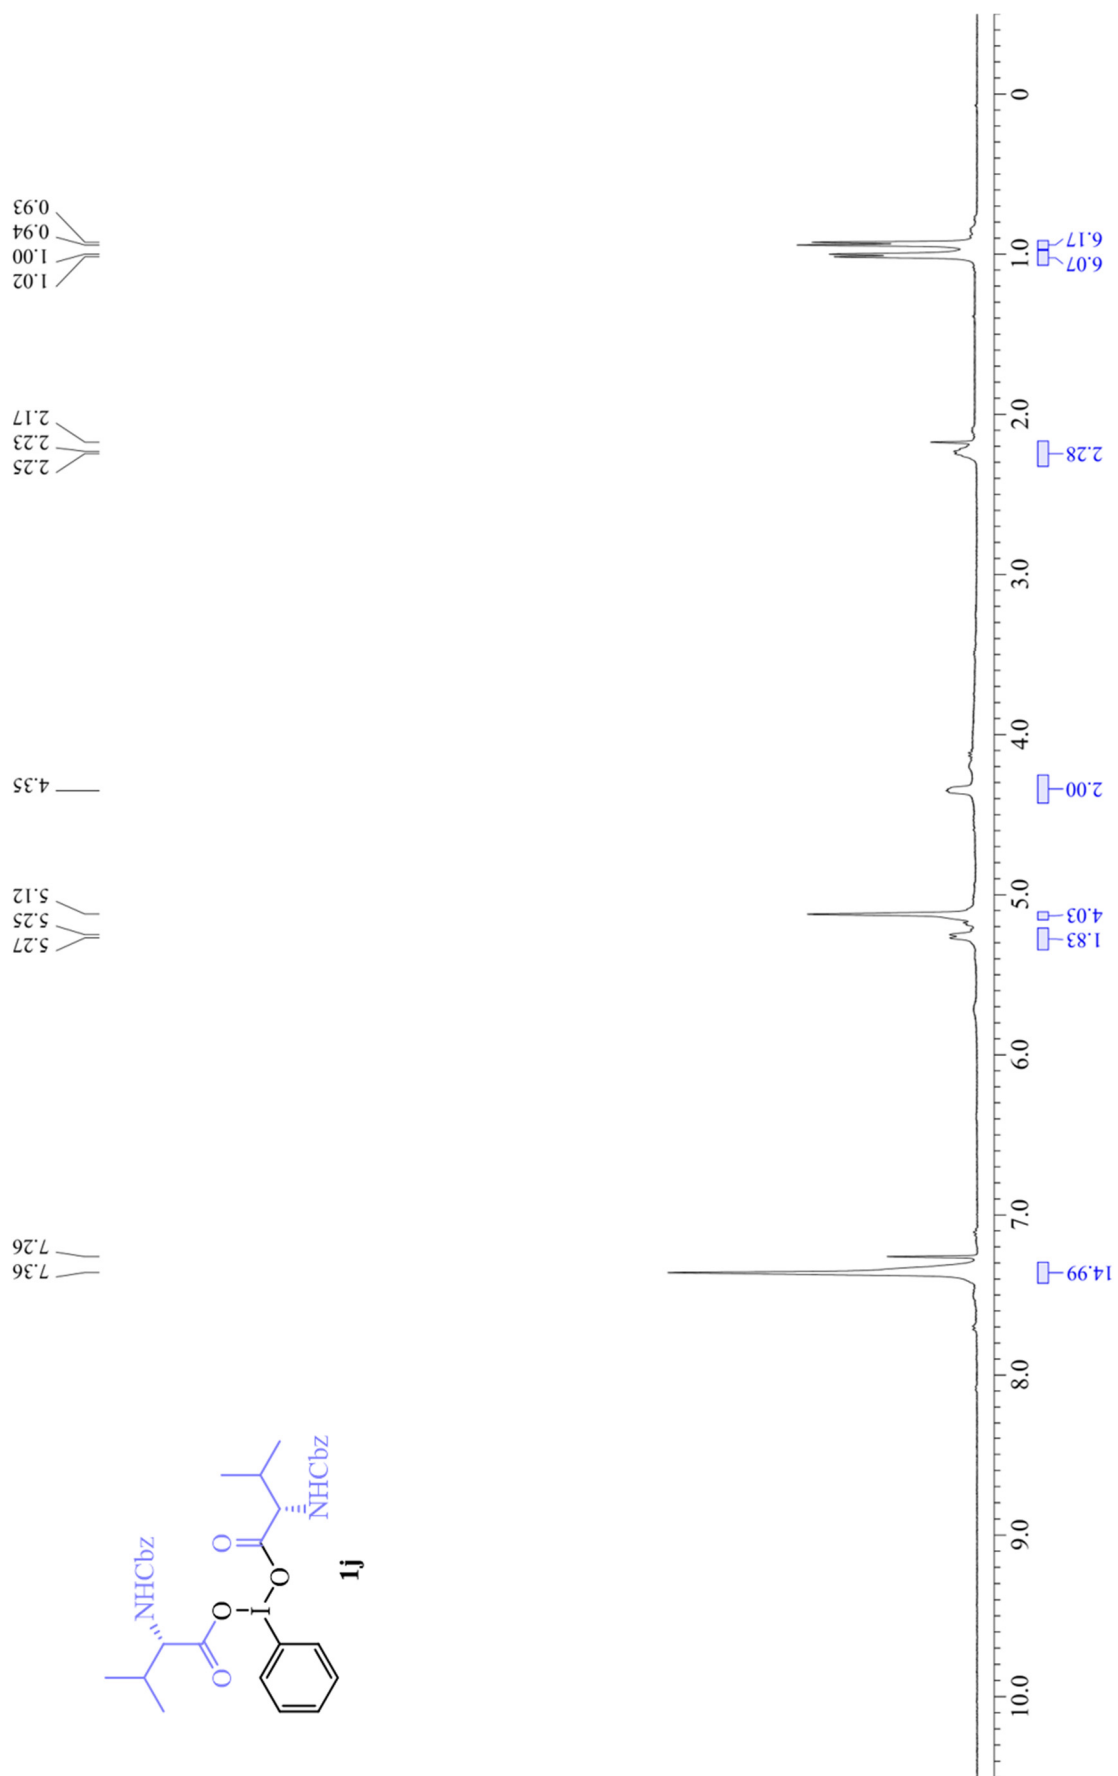

**<sup>1</sup>H NMR spectrum of compound 1j (400 MHz, CDCl<sub>3</sub>)**

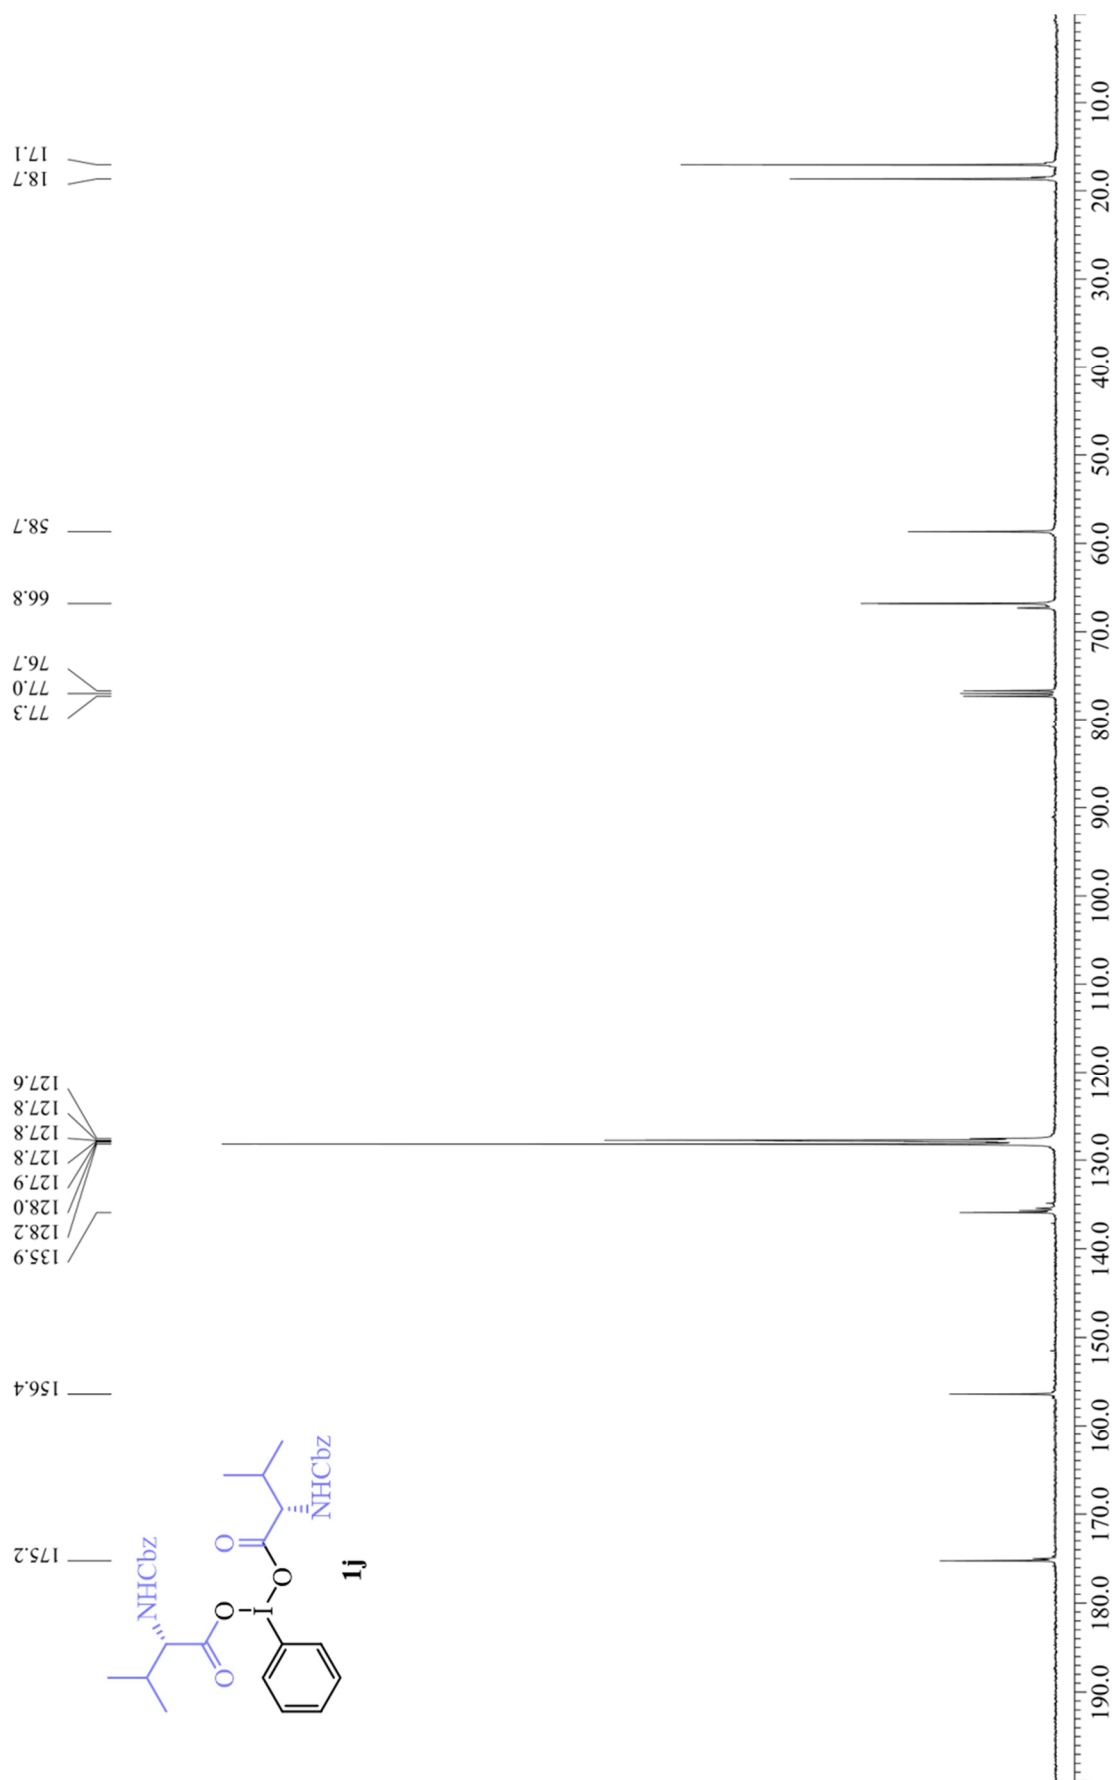

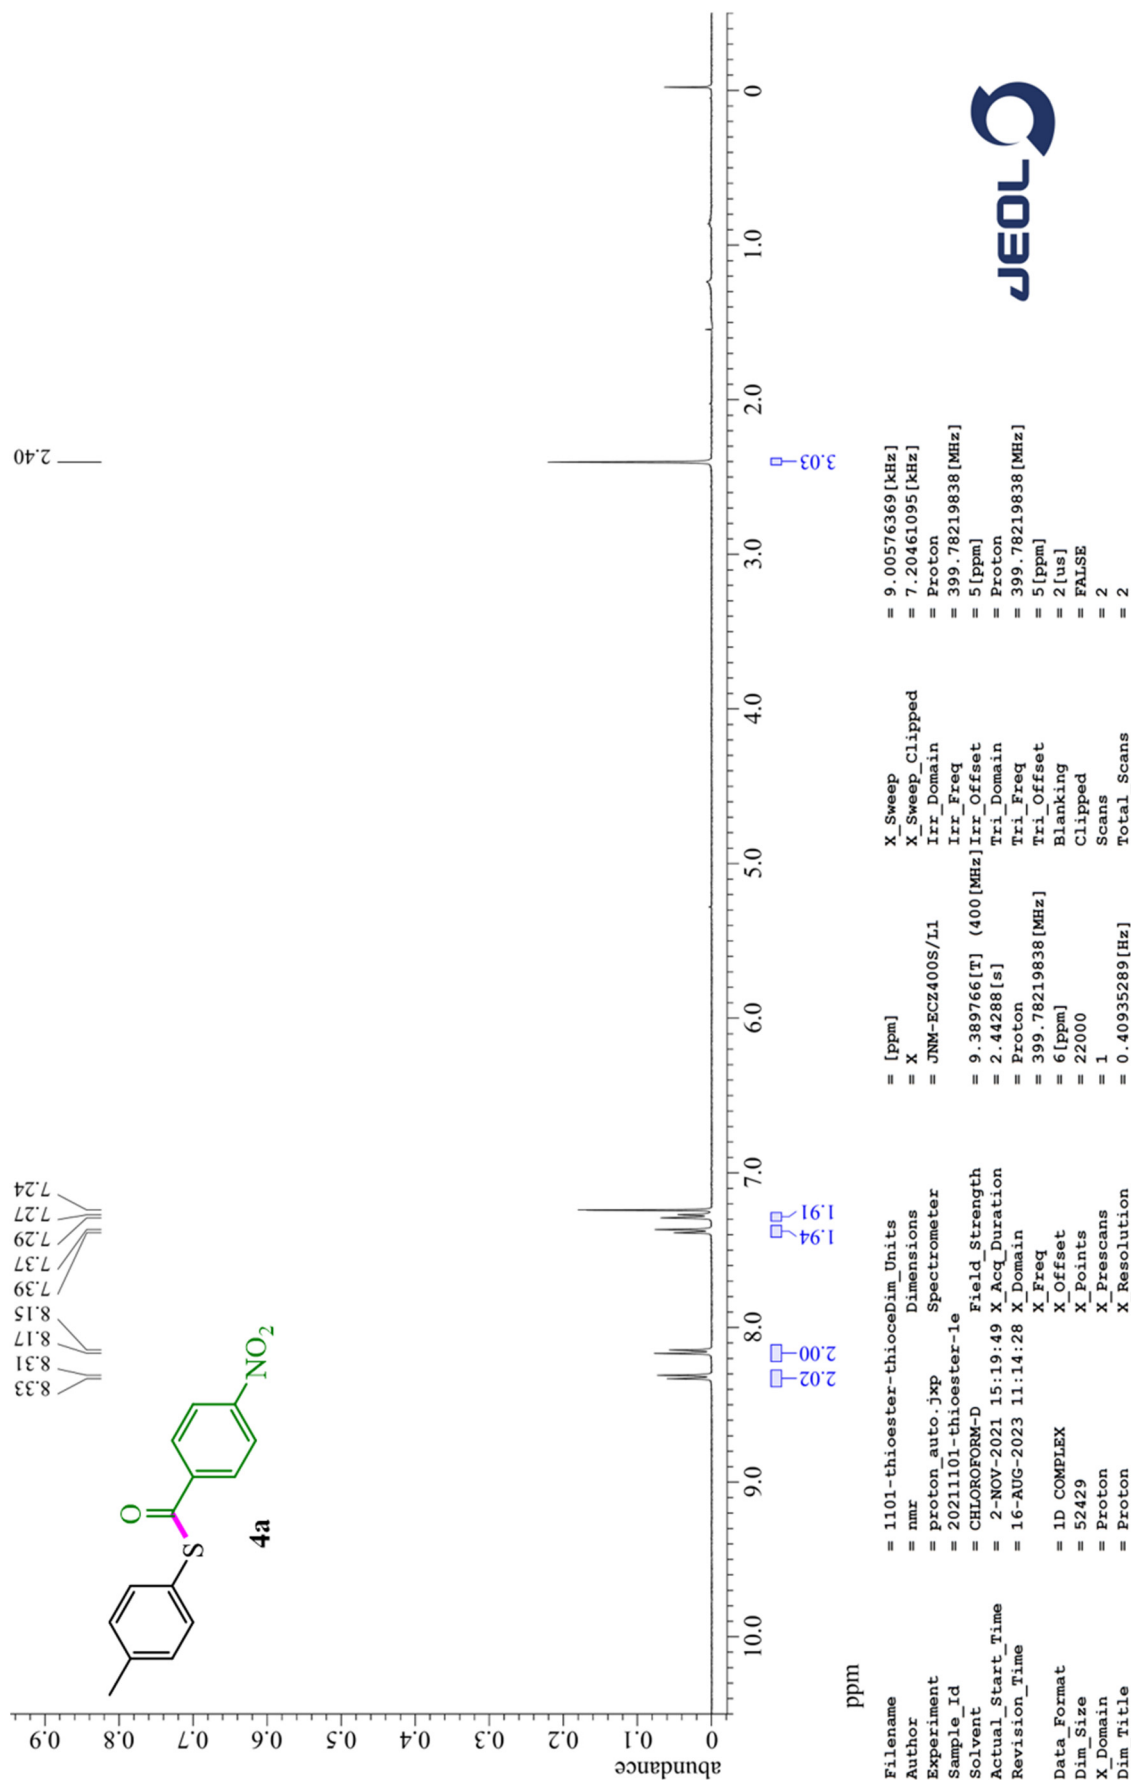

<sup>1</sup>H NMR spectrum of compound **4a** (400 MHz, CDCl<sub>3</sub>)

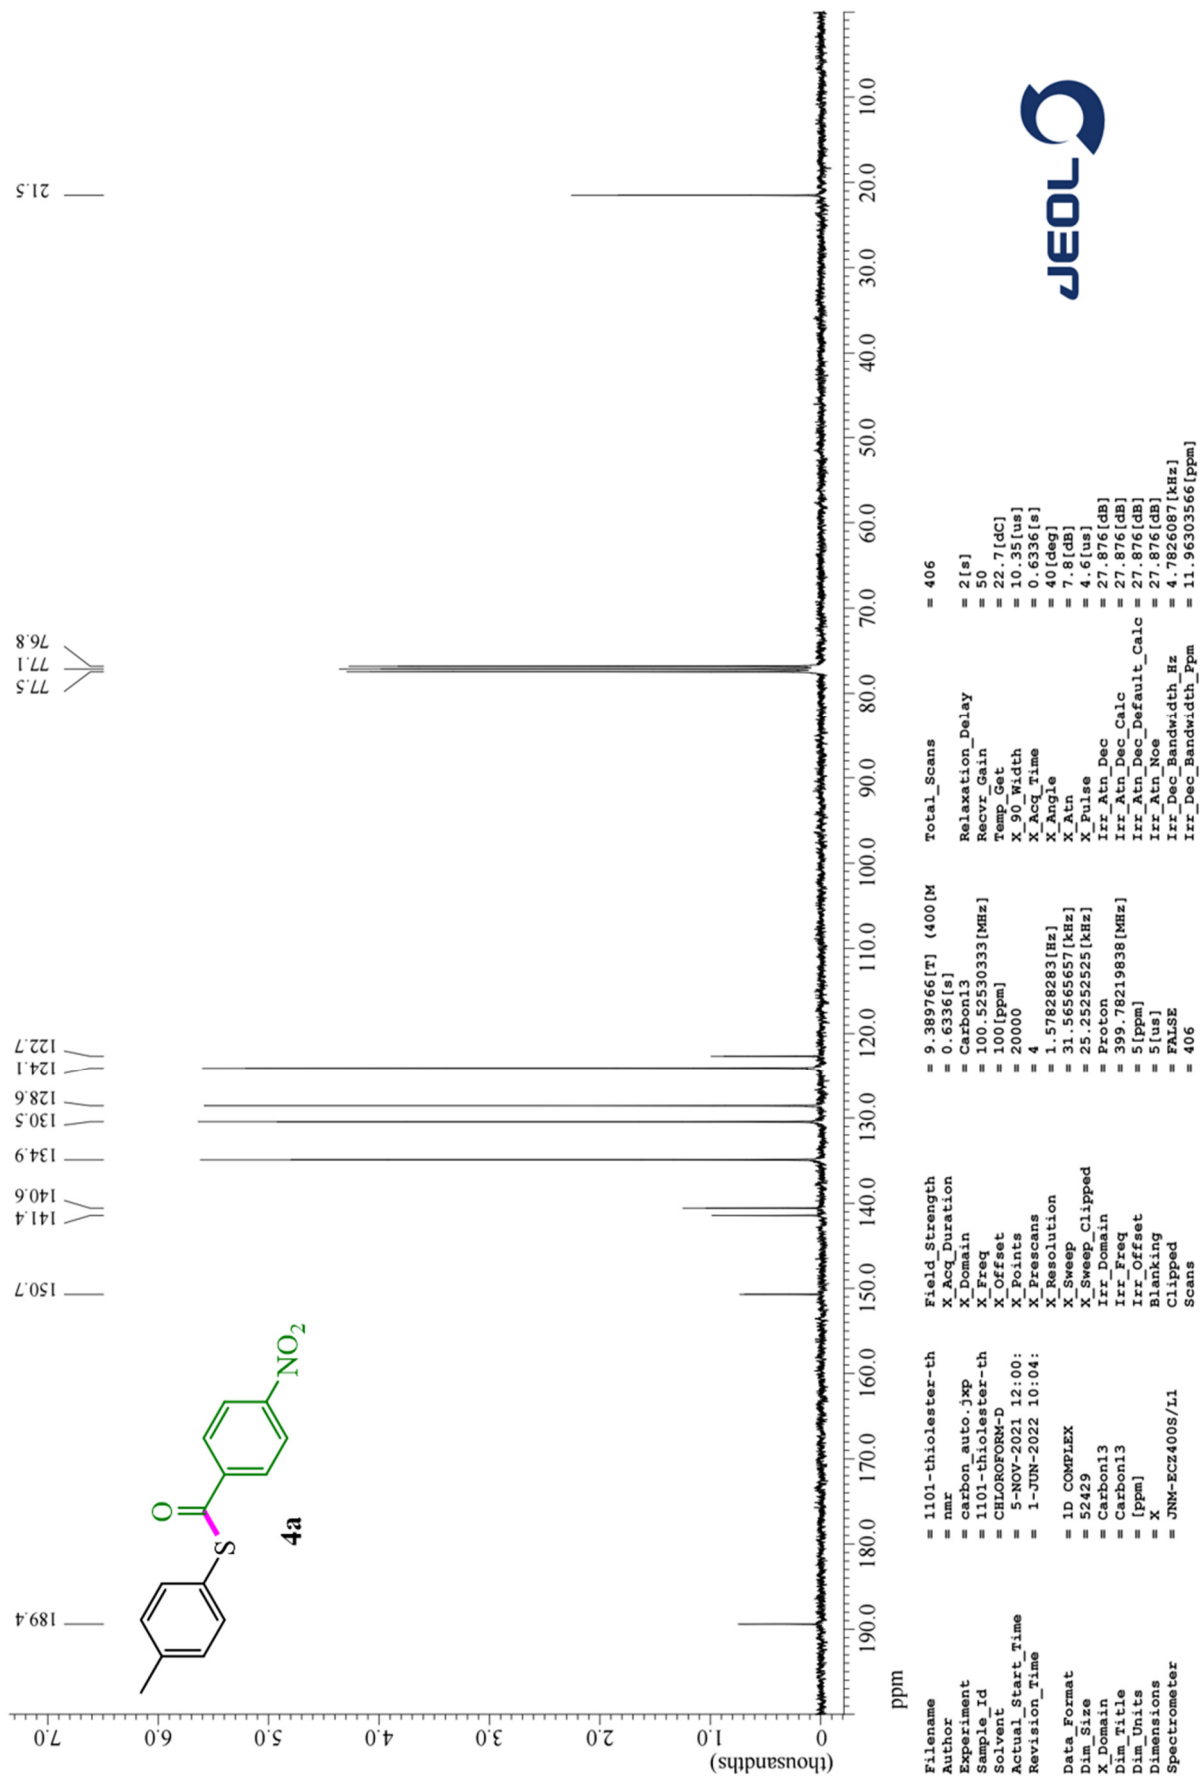

<sup>13</sup>C{H} NMR spectrum of compound **4a** (100 MHz, CDCl<sub>3</sub>)



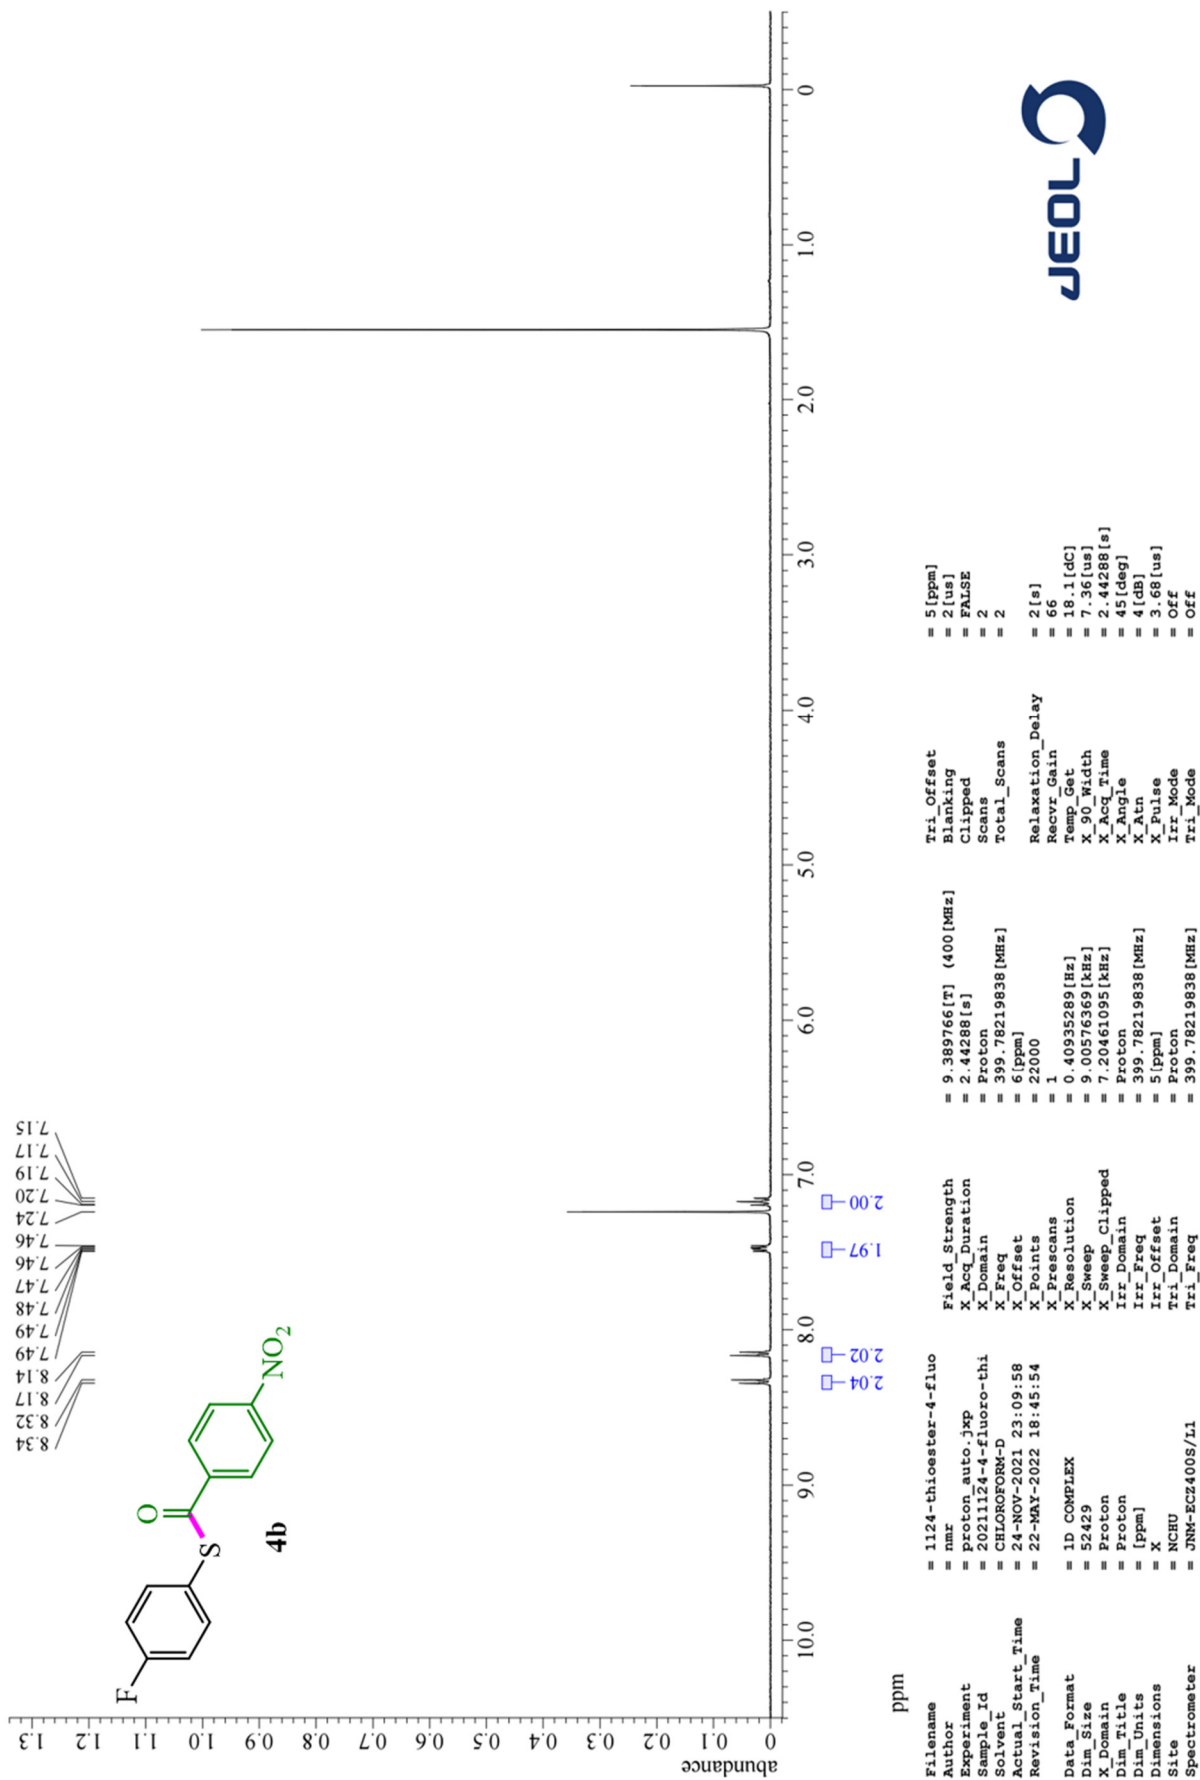

<sup>1</sup>H NMR spectrum of compound **4b** (400 MHz, CDCl<sub>3</sub>)

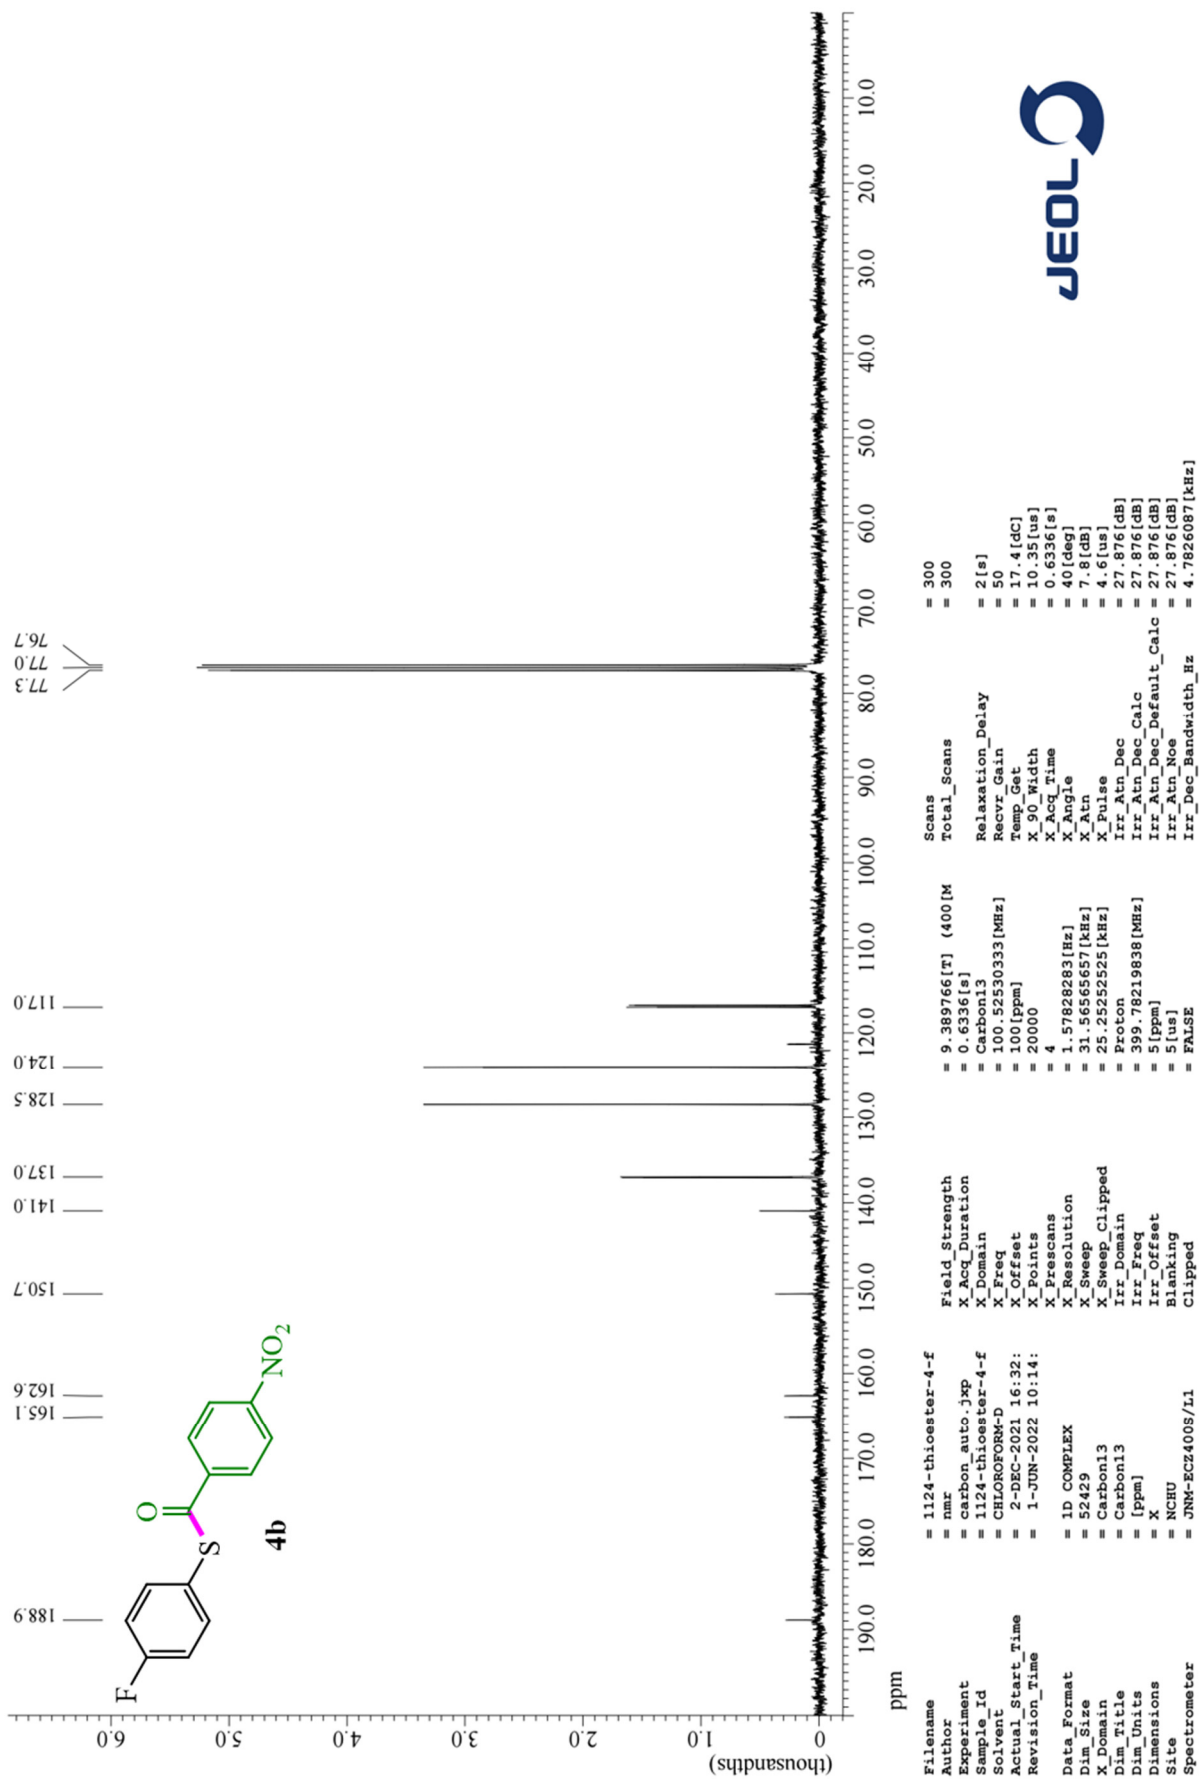

<sup>13</sup>C {H} NMR spectrum of compound **4b** (100 MHz, CDCl<sub>3</sub>)

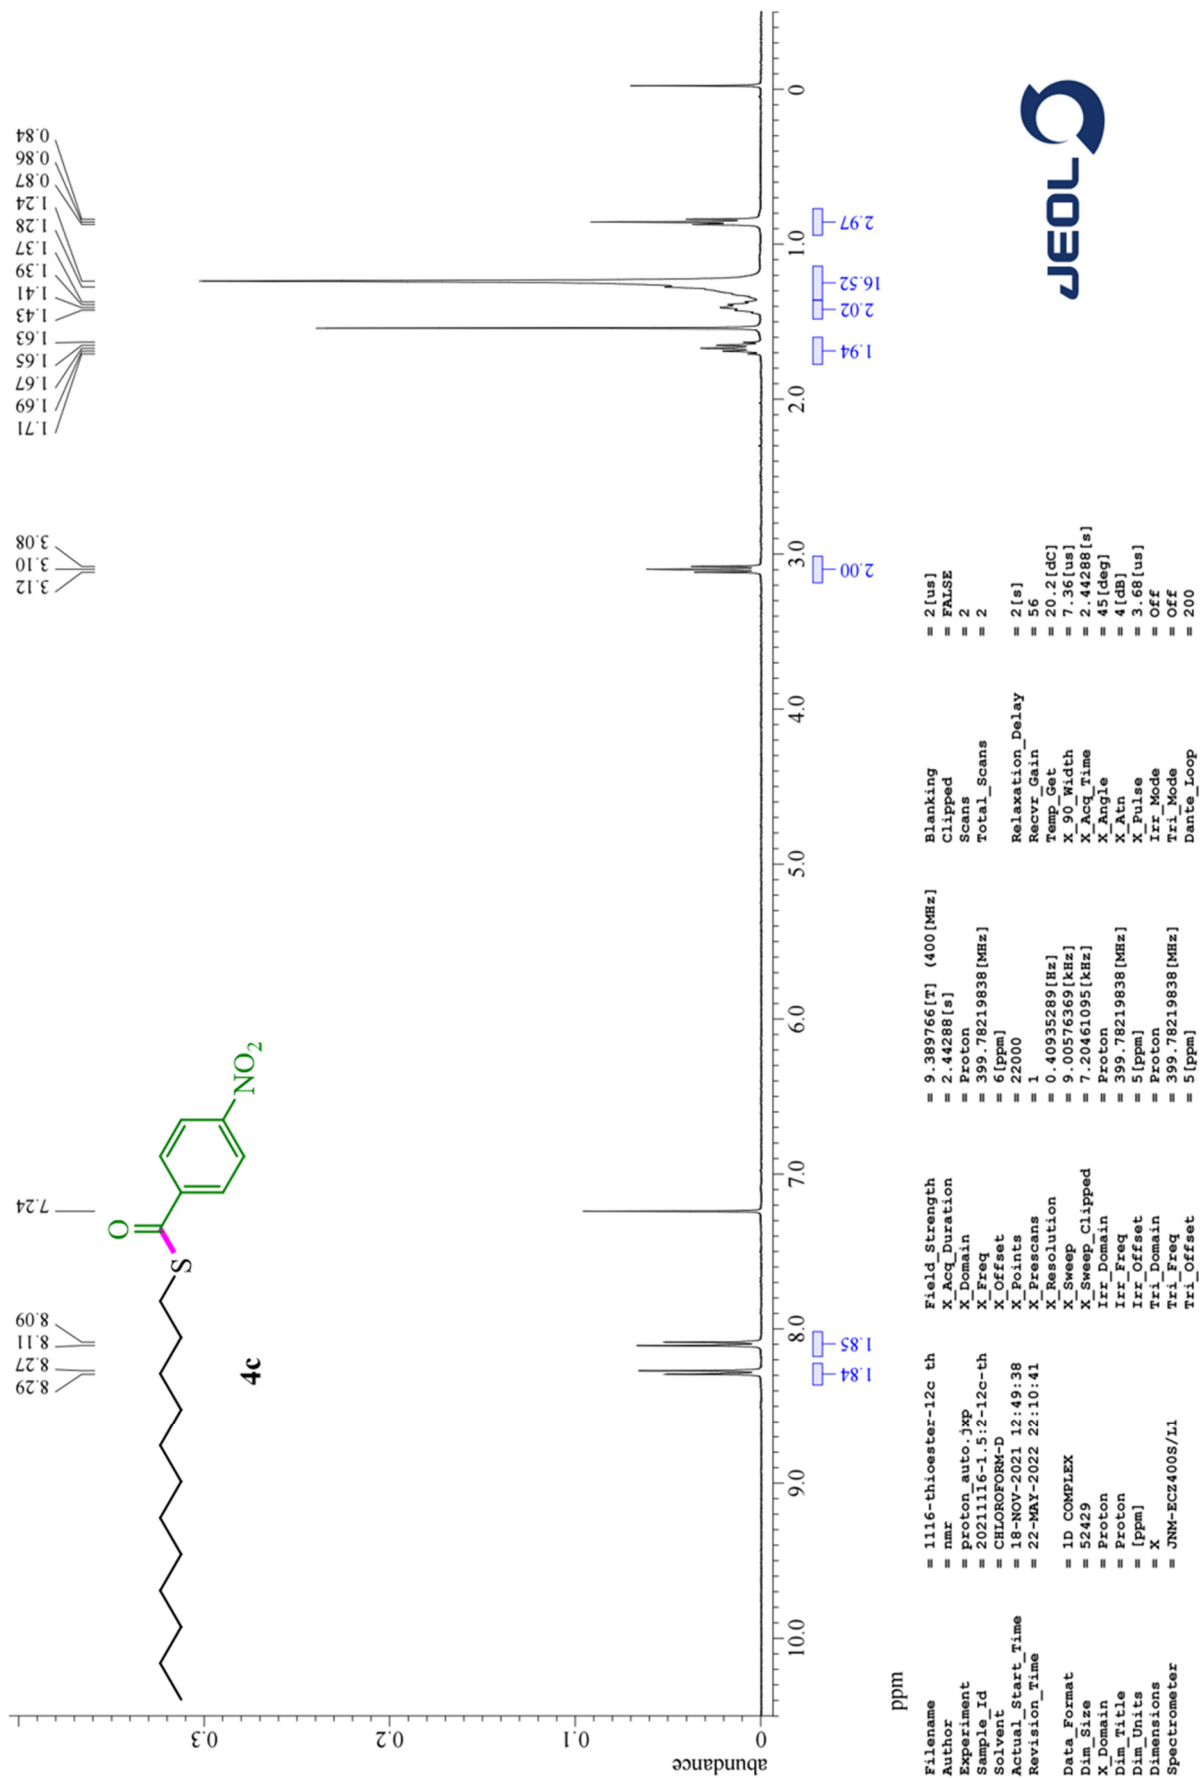

<sup>1</sup>H NMR spectrum of compound **4c** (400 MHz, CDCl<sub>3</sub>)

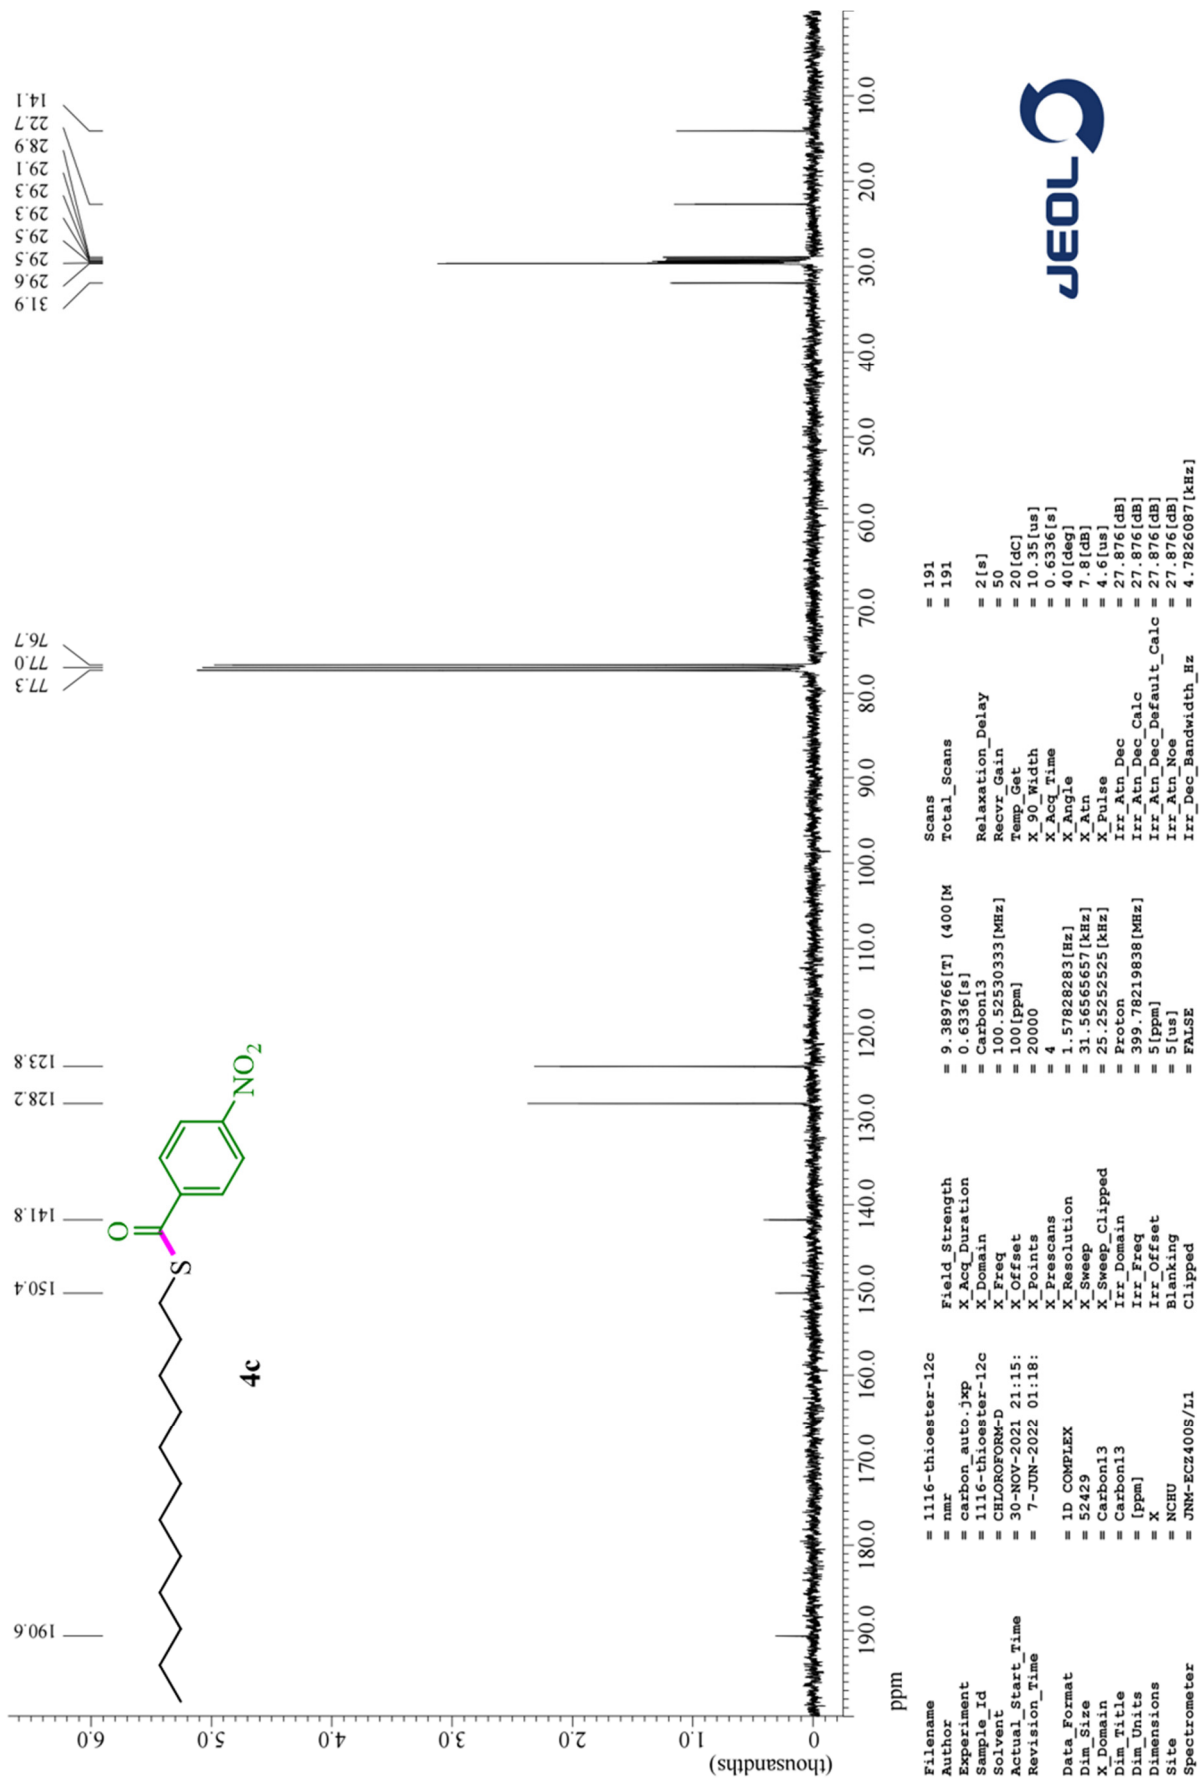

<sup>13</sup>C{H} NMR spectrum of compound **4c** (100 MHz, CDCl<sub>3</sub>)

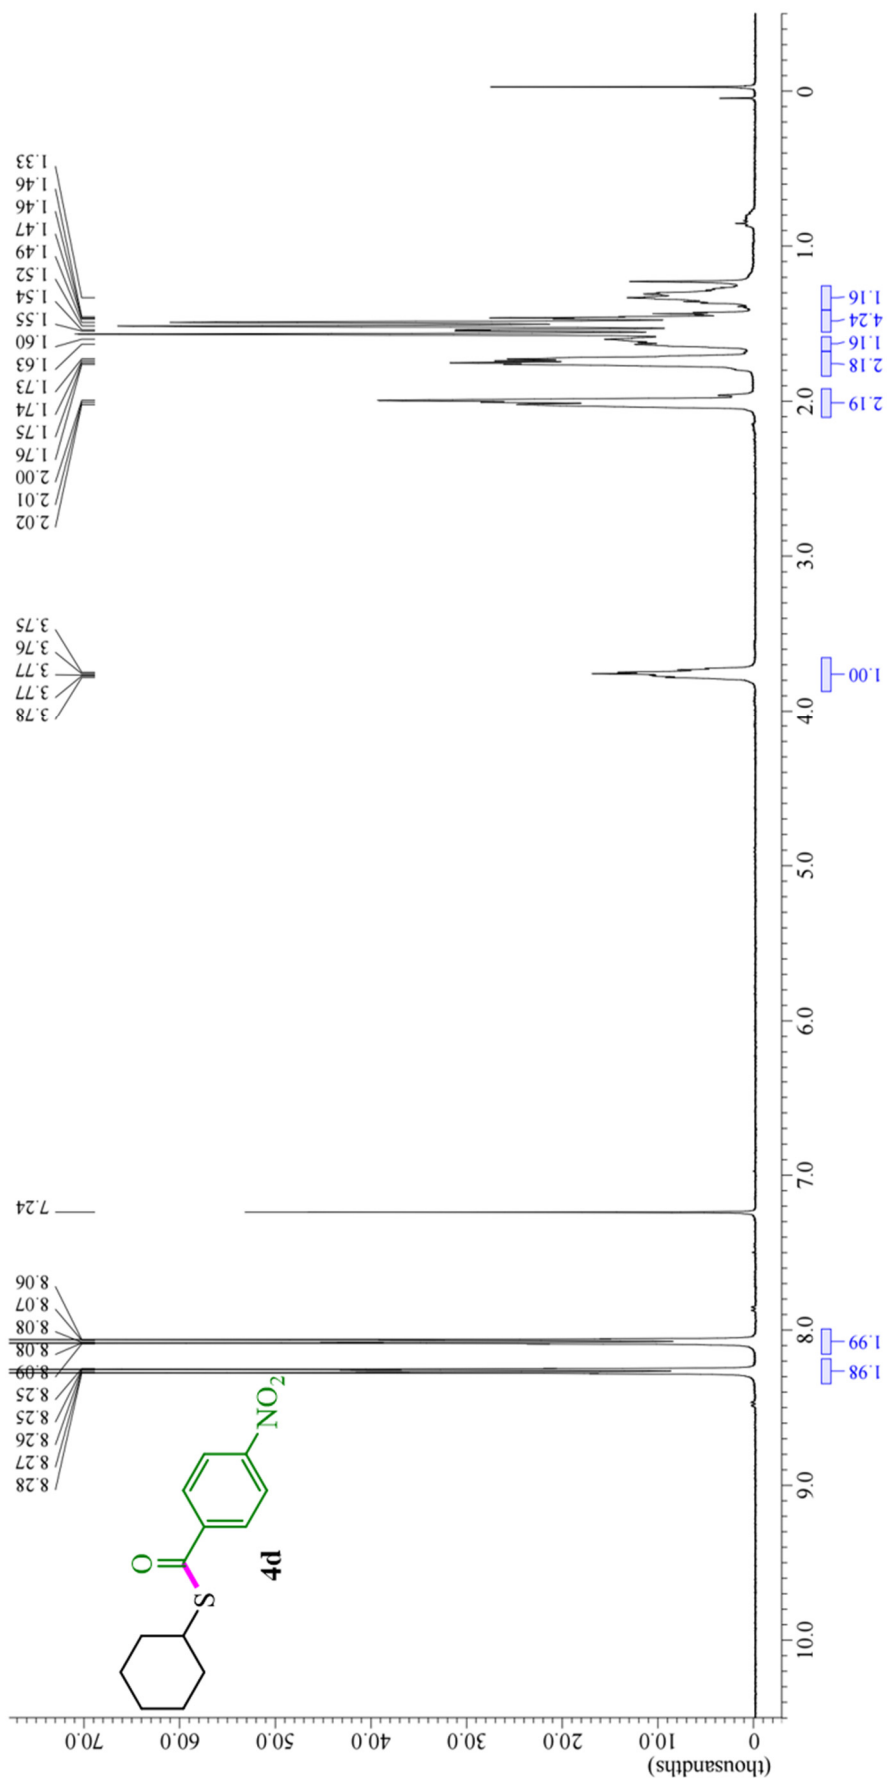

JEOL

ppm

File Name = 1122-thioester-cyclohex  
 Author = nmr  
 Experiment = proton\_auto.jpg  
 Sample Id = 1122-thioester-cyclohex  
 Solvent = CHLOROFORM-D  
 Actual\_Start\_Time = 26-APR-2022 21:25:48  
 Revision\_Time = 26-MAY-2022 22:06:41

Data Format = 1D COMPLEX  
 Dim Size = 52429  
 X\_Domain = Proton  
 Dim Title = Proton  
 Dim Units = [ppm]  
 Dimensions = X  
 Site = NCHU  
 Spectrometer = JNM-ECZ400S/L1

Field Strength = 9.389766[T] (400 [MHz])  
 X\_Acq\_Duration = 2.44288[s]  
 X\_Domain = Proton  
 X\_Freq = 399.78219838 [MHz]  
 X\_Offset = 6 [ppm]  
 X\_Points = 22000  
 X\_Prescans = 1  
 X\_Resolution = 0.40935289 [Hz]  
 X\_Sweep = 9.00576369 [kHz]  
 X\_Sweep\_Clip = 7.20461095 [kHz]  
 Irr\_Domain = Proton  
 Irr\_Freq = 399.78219838 [MHz]  
 Irr\_Offset = 5 [ppm]  
 Tri\_Domain = Proton  
 Tri\_Freq = 399.78219838 [MHz]

Tri\_Offset = 5 [ppm]  
 Blanking = 2 [us]  
 Clipped = FALSE  
 Scans = 2  
 Total\_Scans = 2  
 Relaxation\_Delay = 2 [s]  
 Recvr Gain = 46  
 Temp Get = 22.3 [dC]  
 X\_90\_Width = 7.36 [us]  
 X\_Acq\_Time = 2.44288 [s]  
 X\_Angle = 45 [deg]  
 X\_Atn = 4 [dB]  
 X\_Pulse = 3.68 [us]  
 Irr\_Mode = Off  
 Tri\_Mode = Off

<sup>1</sup>H NMR spectrum of compound **4d** (400 MHz, CDCl<sub>3</sub>)

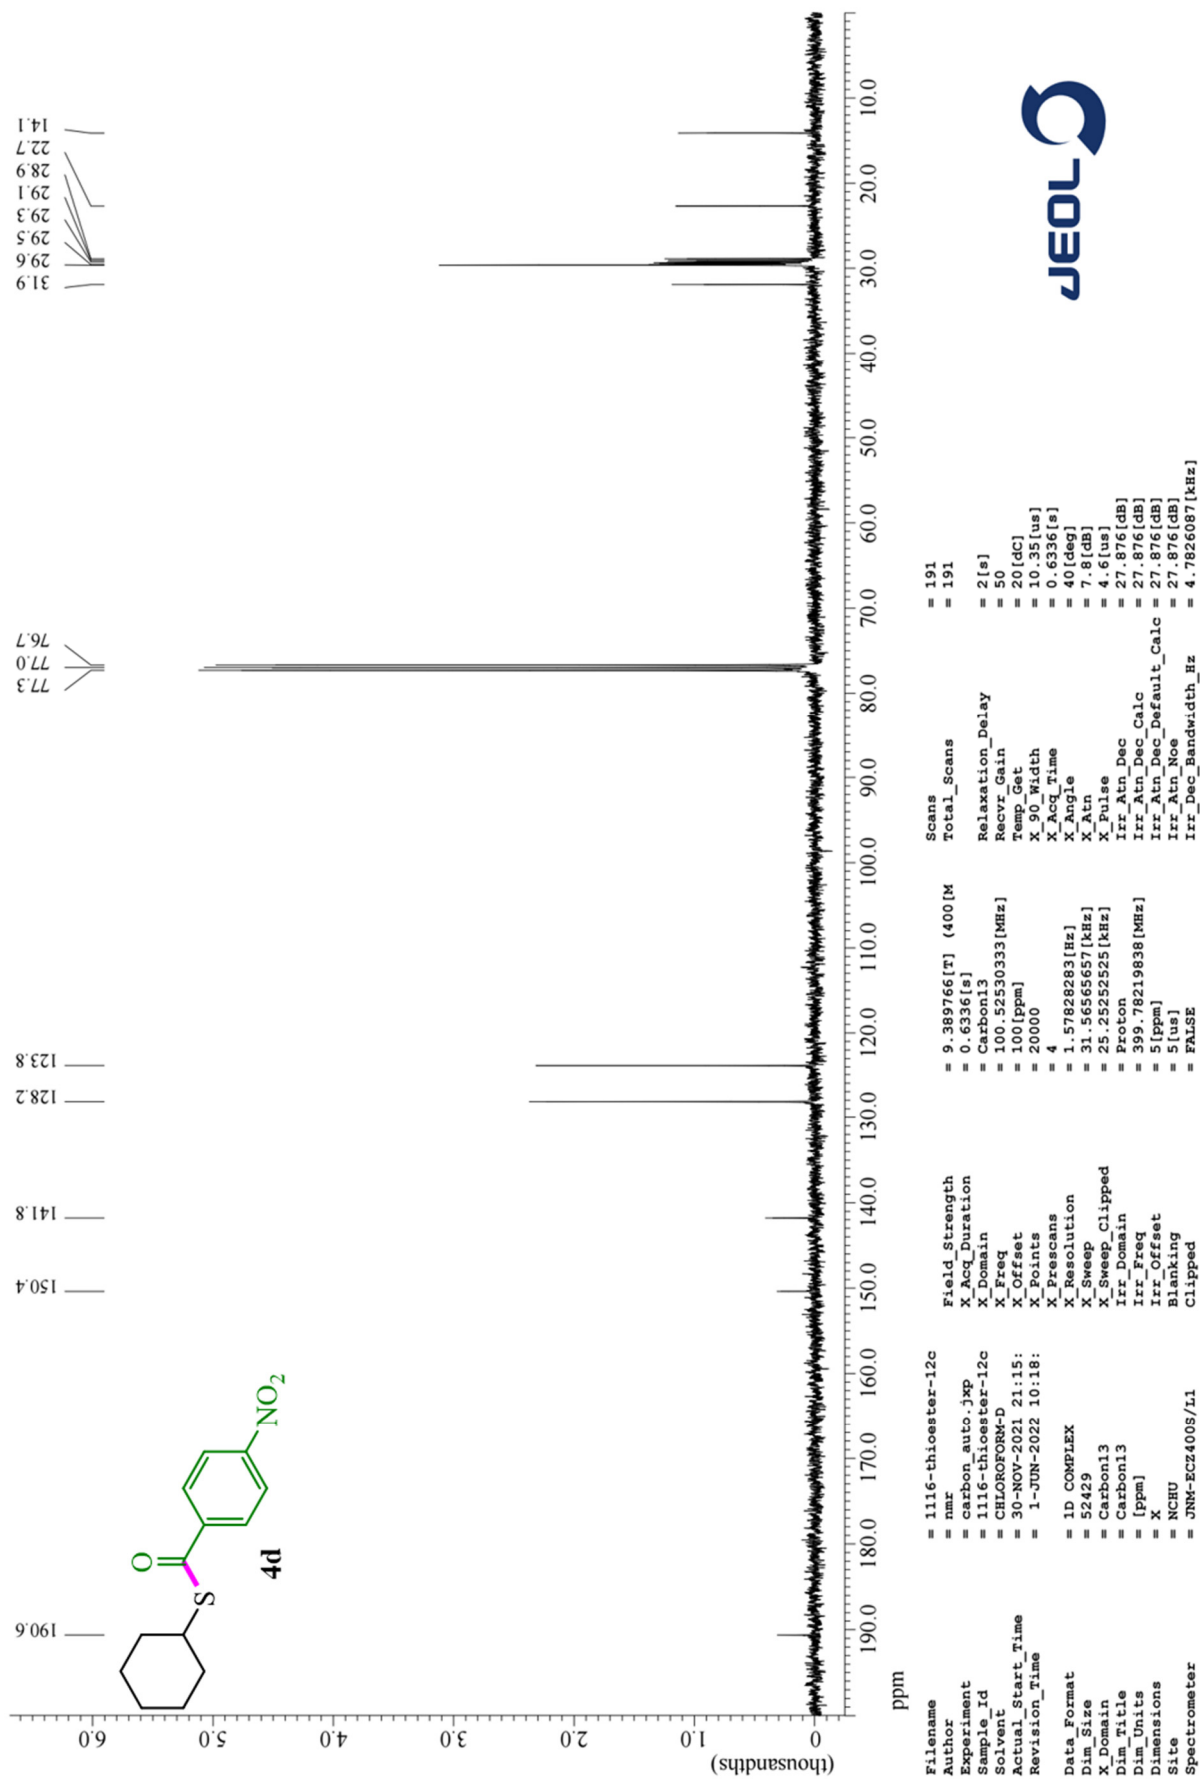

$^{13}\text{C}\{^1\text{H}\}$  NMR spectrum of compound **4d** (100 MHz,  $\text{CDCl}_3$ )

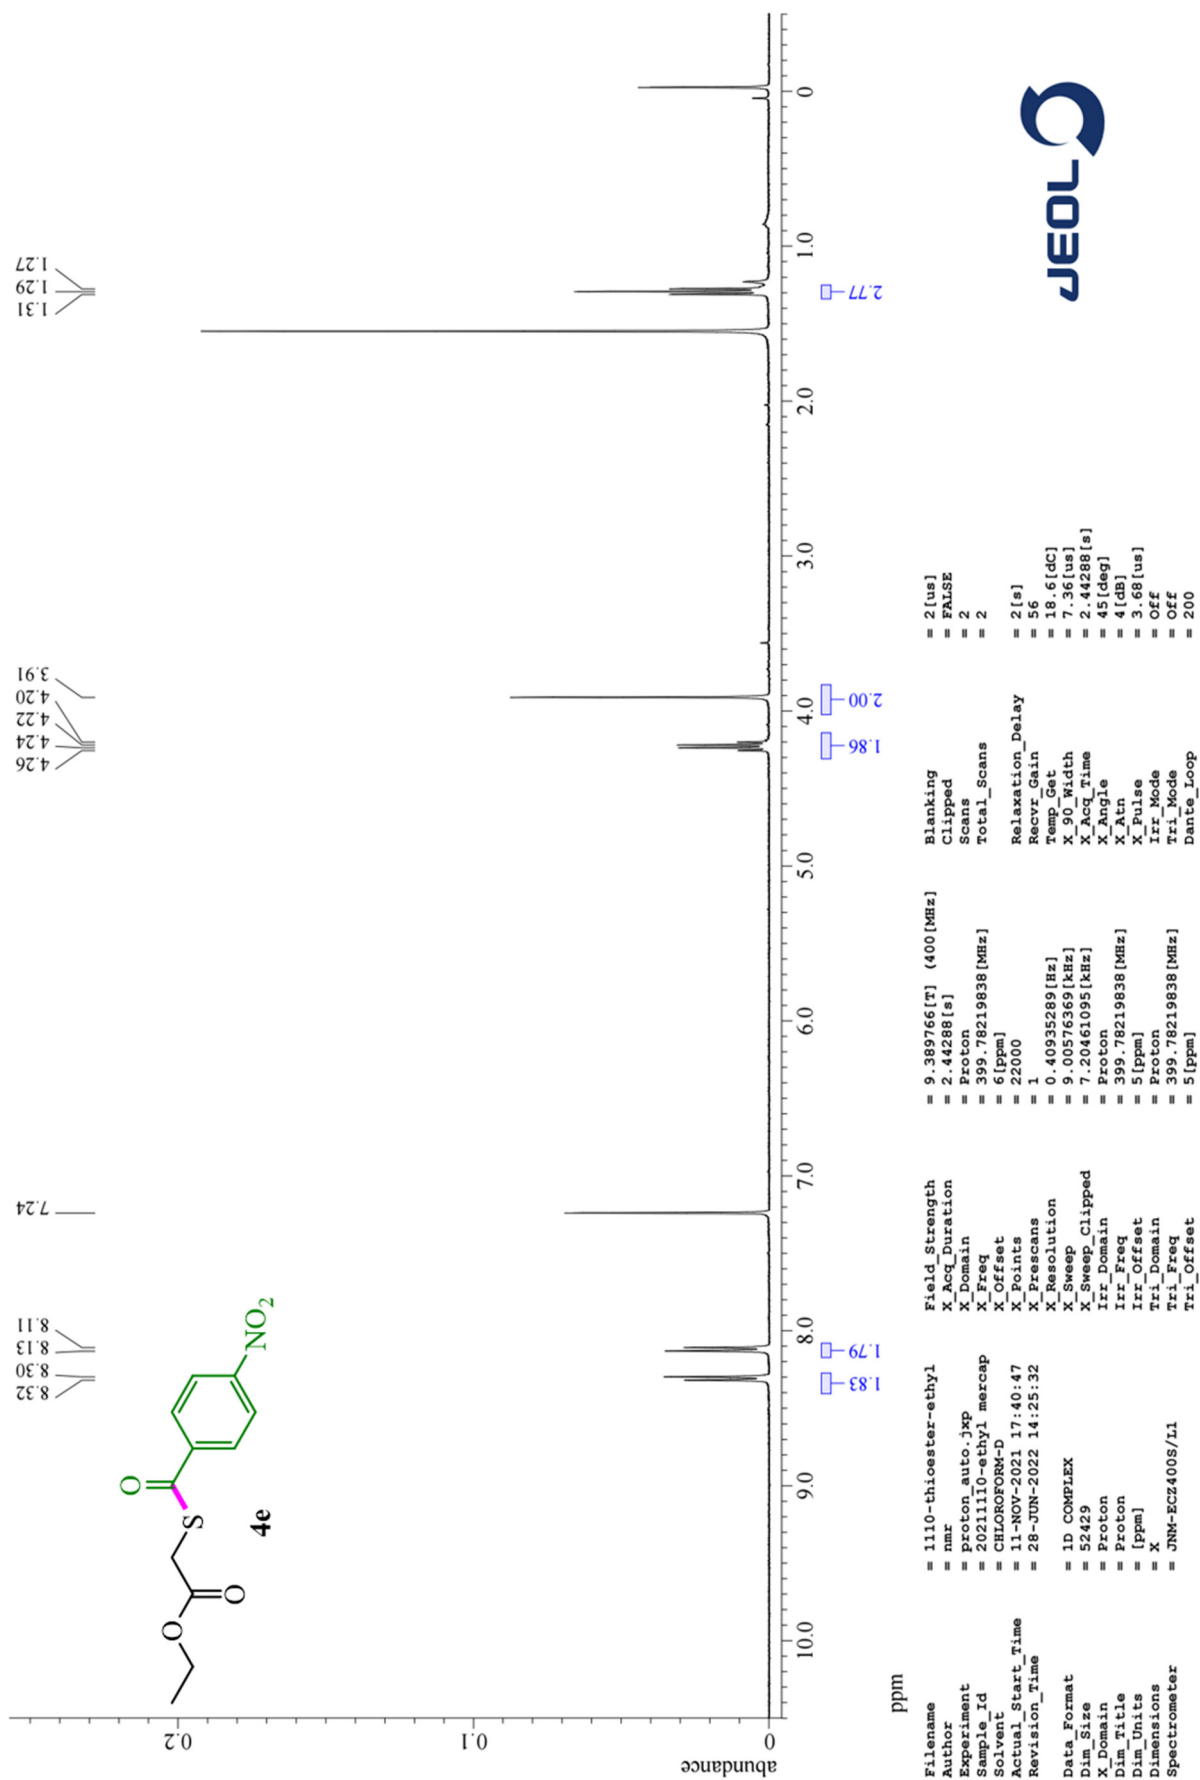

<sup>1</sup>H NMR spectrum of compound **4e** (400 MHz, CDCl<sub>3</sub>)



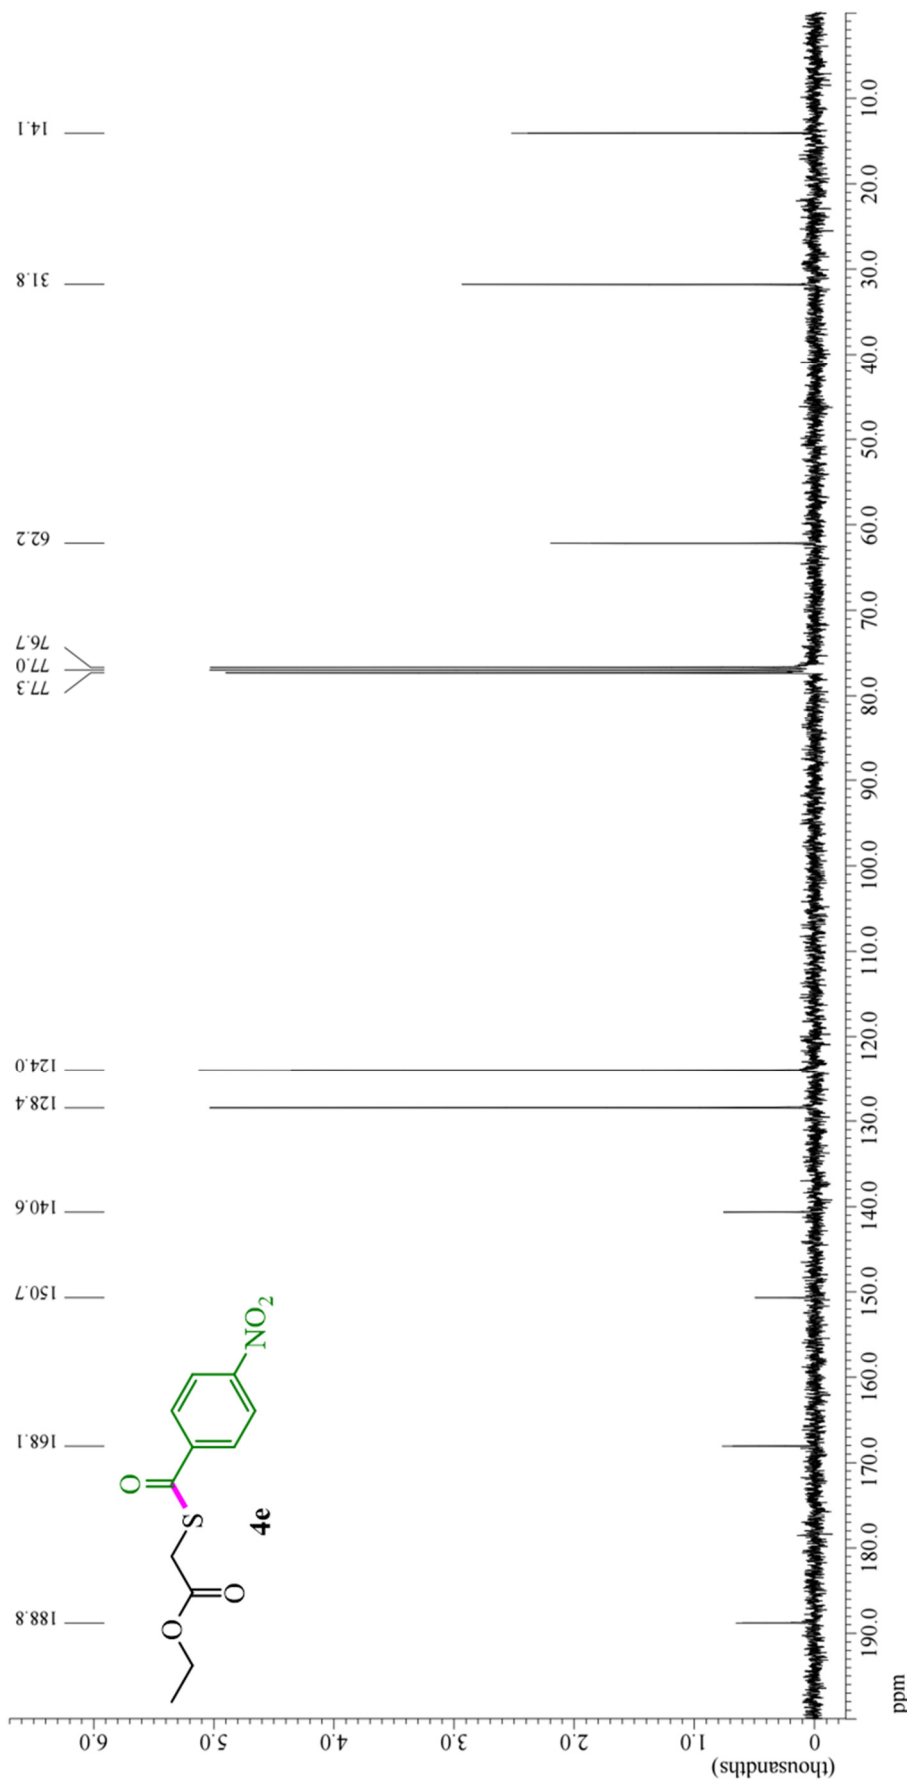

$^{13}\text{C}\{^1\text{H}\}$  NMR spectrum of compound **4e** (100 MHz,  $\text{CDCl}_3$ )

JEOL

```

Filename = 0502-thioester-eth
Author = nmr
Experiment = carbon_auto.jpg
Sample_Id = 0502-thioester-eth
Solvent = CHLOROFORM-D
Actual_Start_Time = 5-MAY-2022 10:52:
Revision_Time = 1-JUN-2022 10:23:
Data_Format = 1D COMPLEX
Dim_Size = 52429
X_Domain = Carbon13
Dim_Rticle = [ppm]
Dim_Units = X
Dimensions = X
Site = NCHU
Spectrometer = JNM-ECZ400S/L1

Field_Strength = 9.389766[T] (400[M]
X_Acq_Puration = 0.6336[s]
X_Domain = Carbon13
X_Freq = 100.52530333[MHz]
X_Offset = 100[ppm]
X_Points = 20000
X_Prescans = 4
X_Resolution = 1.57828283[Hz]
X_Sweep = 31.5655657[kHz]
X_Sweep_Clippped = 25.25252525[kHz]
Irr_Domain = Proton
Irr_Freq = 399.78219838[MHz]
Irr_Offset = 5[ppm]
Blanking = 5[us]
Clipped = FALSE

Scans = 105
Total_Scans = 105
Relaxation_Delay = 2[s]
Recvr_Gain = 50
Temp_Get = 21[dc]
X_90_Width = 10.35[us]
X_Acq_Time = 0.6336[s]
X_Angle = 40[deg]
X_Rtn = 7.8[dB]
X_Pulse = 4.6[us]
Irr_Atn_Dec = 27.876[dB]
Irr_Atn_Dec_Calc = 27.876[dB]
Irr_Atn_Noie = 27.876[dB]
Irr_Atn_Noie_Calc = 27.876[dB]
Irr_Dec_Bandwidth_Hz = 4.7826087[kHz]
  
```



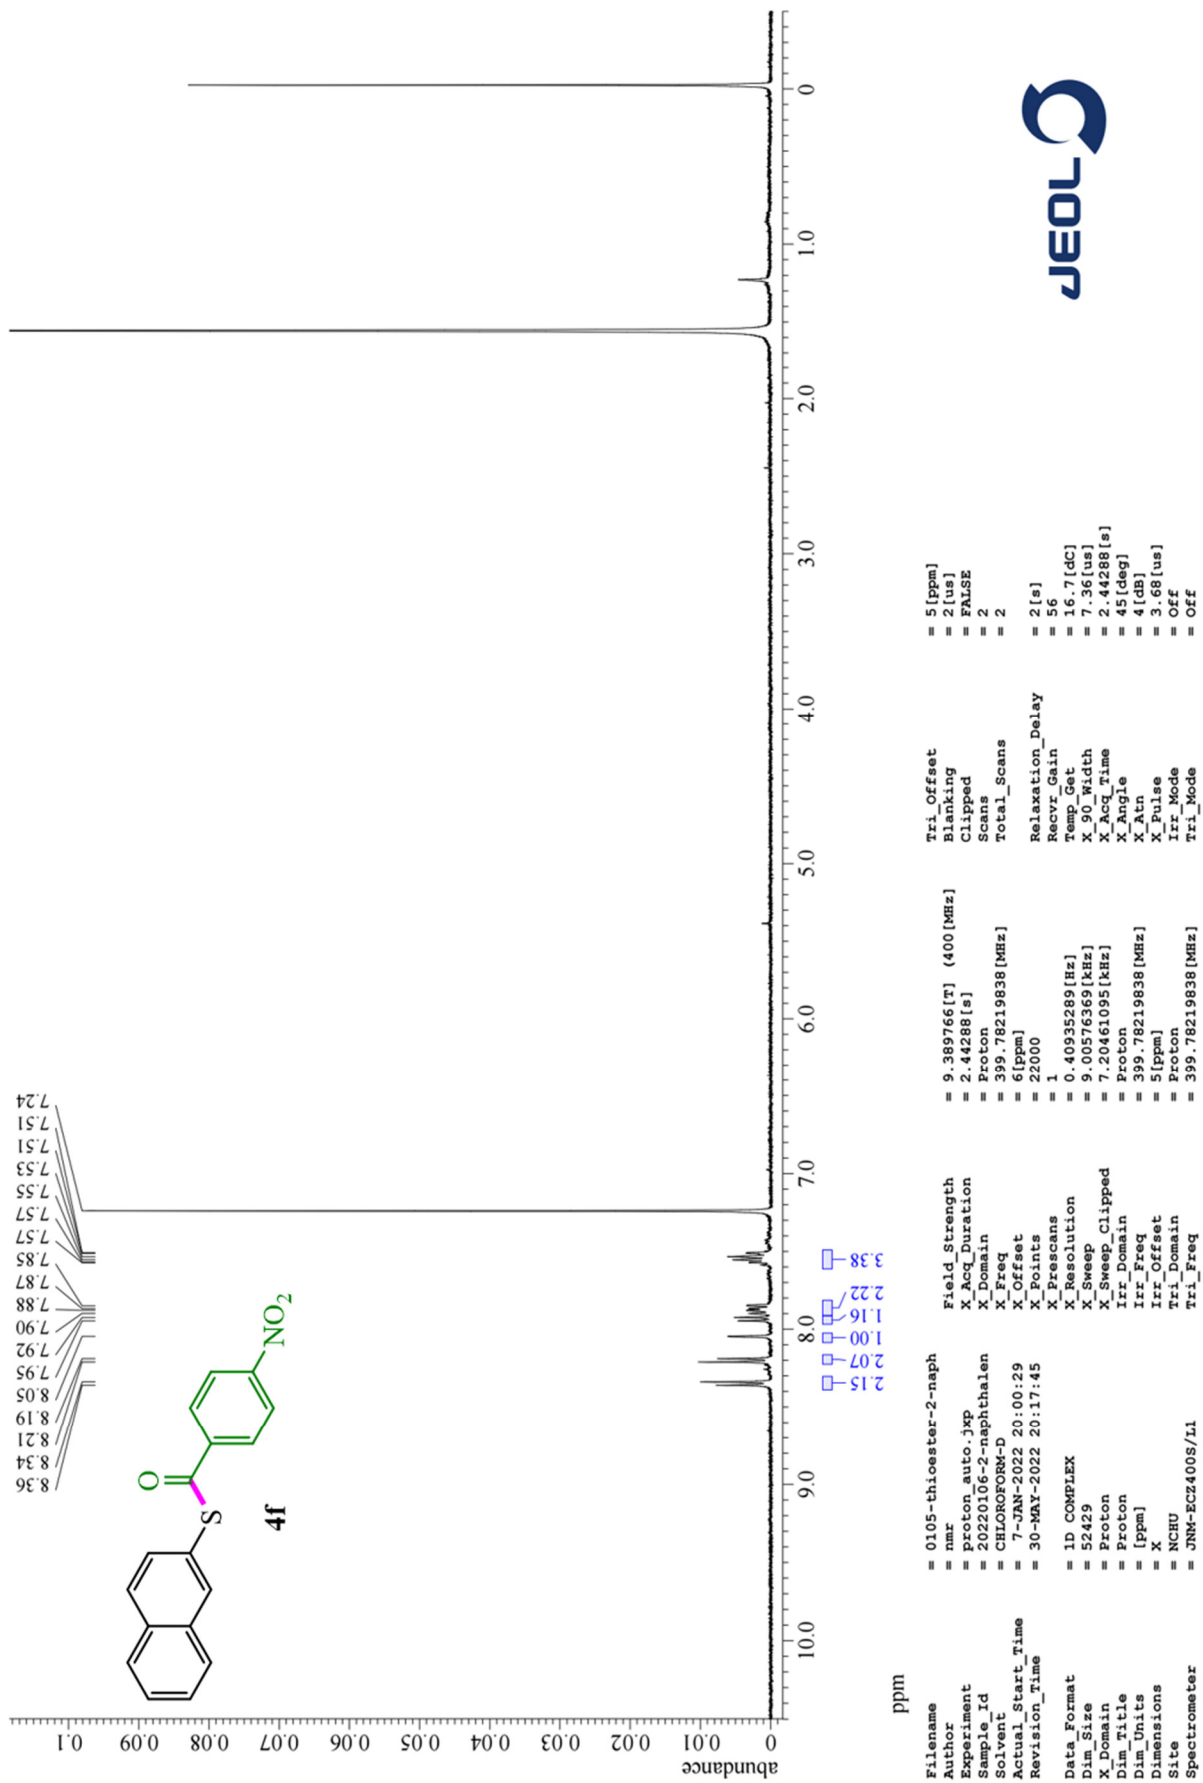

<sup>1</sup>H NMR spectrum of compound **4f** (400 MHz, CDCl<sub>3</sub>)

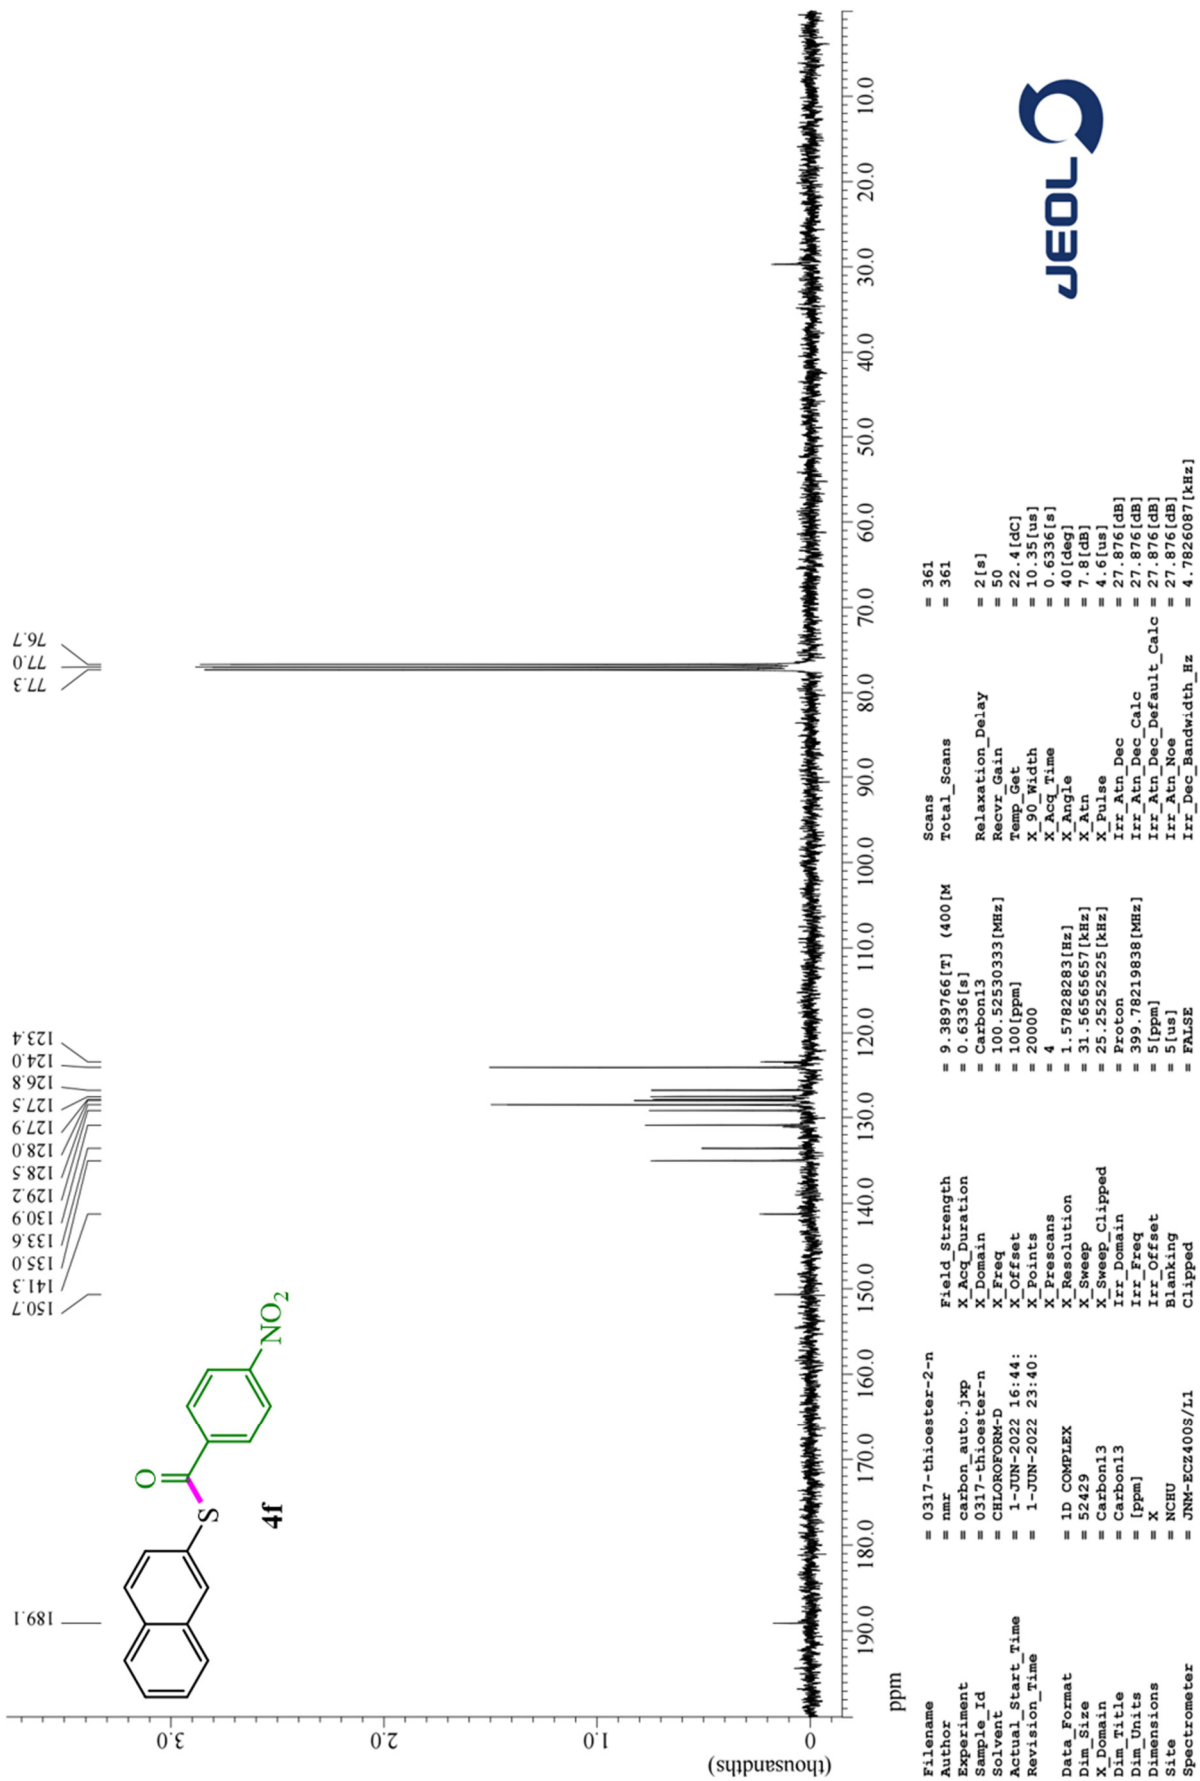

<sup>13</sup>C{H} NMR spectrum of compound **4f** (100 MHz, CDCl<sub>3</sub>)

JEOL

```

Filename = 0317-thioester-2-n
Author = nmr
Experiment = carbon_auto.jpg
Sample_Id = 0317-thioester-n
Solvent = CHLOROFORM-D
Actual_Start_Time = 1-JUN-2022 16:44:
Revision_Time = 1-JUN-2022 23:40:
Data_Format = 1D COMPLEX
Dim_Size = 52429
X_Domain = Carbon13
Dim_Title = Carbon13
Dim_Units = [ppm]
Dimensions = X
Site = NCHU
Spectrometer = JNM-ECZ400S/L1

Field Strength = 9.389766[T] (400[M]
X_Acq_Duration = 0.6336[s]
X_Domain = Carbon13
X_Freq = 100.52530333[MHz]
X_Offset = 100[ppm]
X_Points = 20000
X_Prescans = 4
X_Resolution = 1.57828283[Hz]
X_Sweep = 31.56565657[kHz]
X_Sweep_Clippped = 25.25252525[kHz]
Irr_Domain = Proton
Irr_Freq = 399.78219838[MHz]
Irr_Offset = 5[ppm]
Blanking = FALSE
Clipped = FALSE

Total_Scans = 361
Relaxation_Delay = 2[s]
Recvr_Gain = 50
Temp_Get = 22.4[dc]
X_90_Width = 10.35[us]
X_Acq_Time = 0.6336[s]
X_Angle = 40[deg]
X_Atn = 7.8[db]
X_Pulse = 4.6[us]
Irr_Atn_Dec = 27.876[db]
Irr_Atn_Dec_Calc = 27.876[db]
Irr_Atn_Dec_Default_Calc = 27.876[db]
Irr_Atn_Noise = 27.876[db]
Irr_Dec_Bandwidth_Hz = 4.7826087[kHz]
  
```

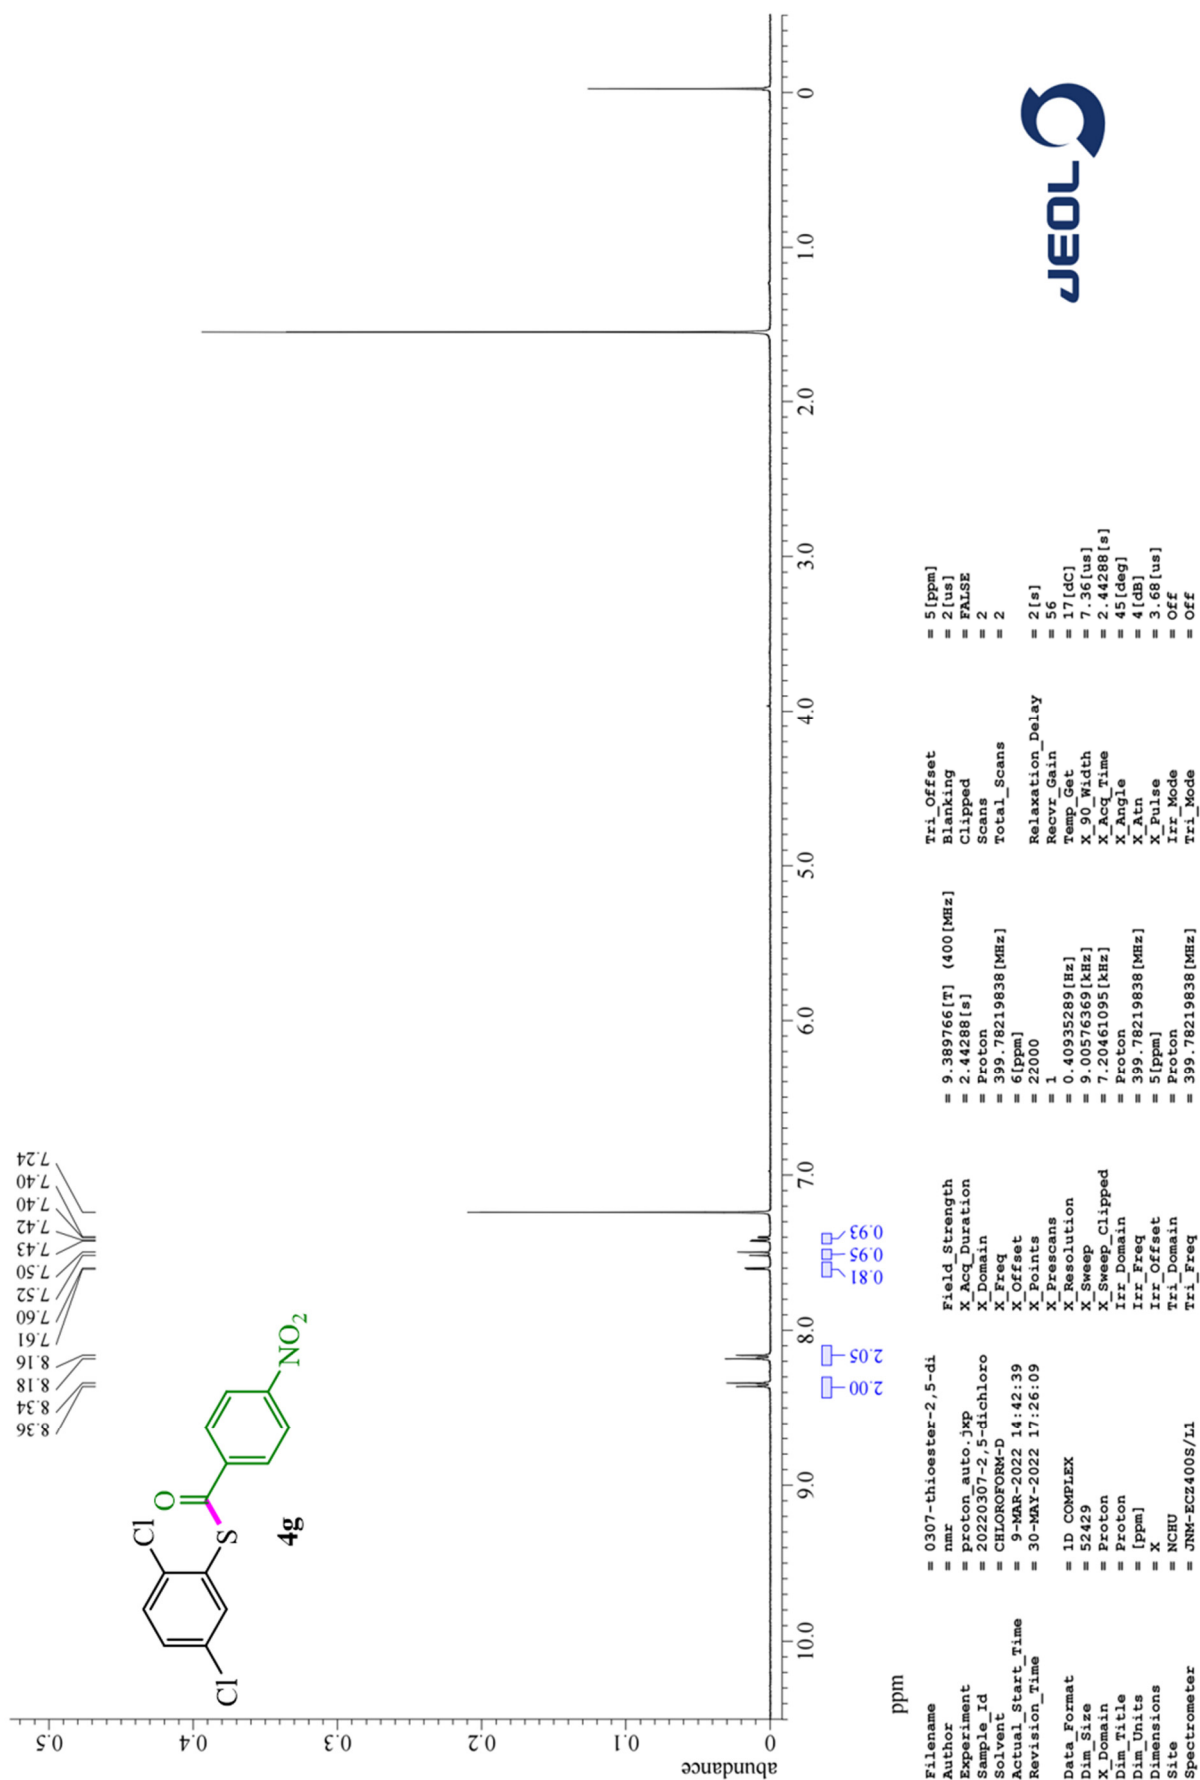

<sup>1</sup>H NMR spectrum of compound **4g** (400 MHz, CDCl<sub>3</sub>)

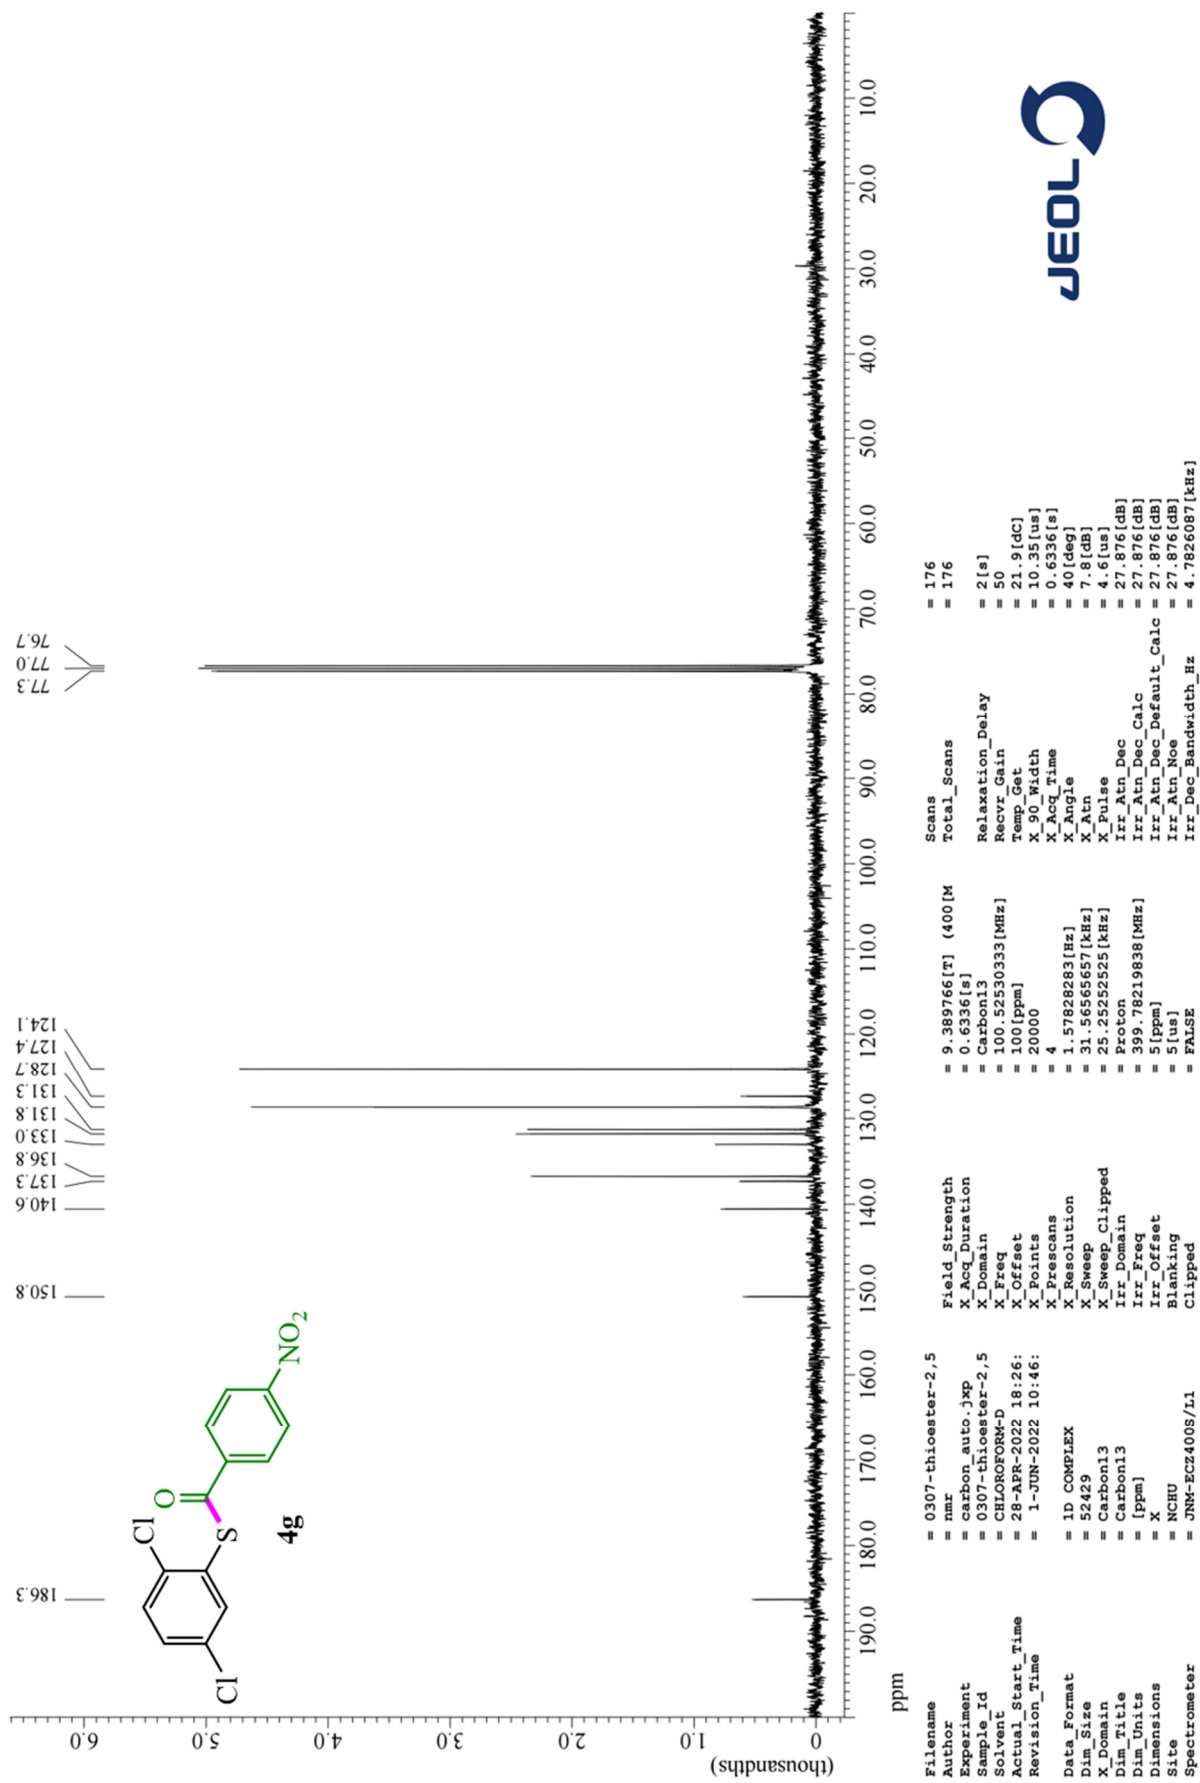

<sup>13</sup>C{H} NMR spectrum of compound **4g** (100 MHz, CDCl<sub>3</sub>)

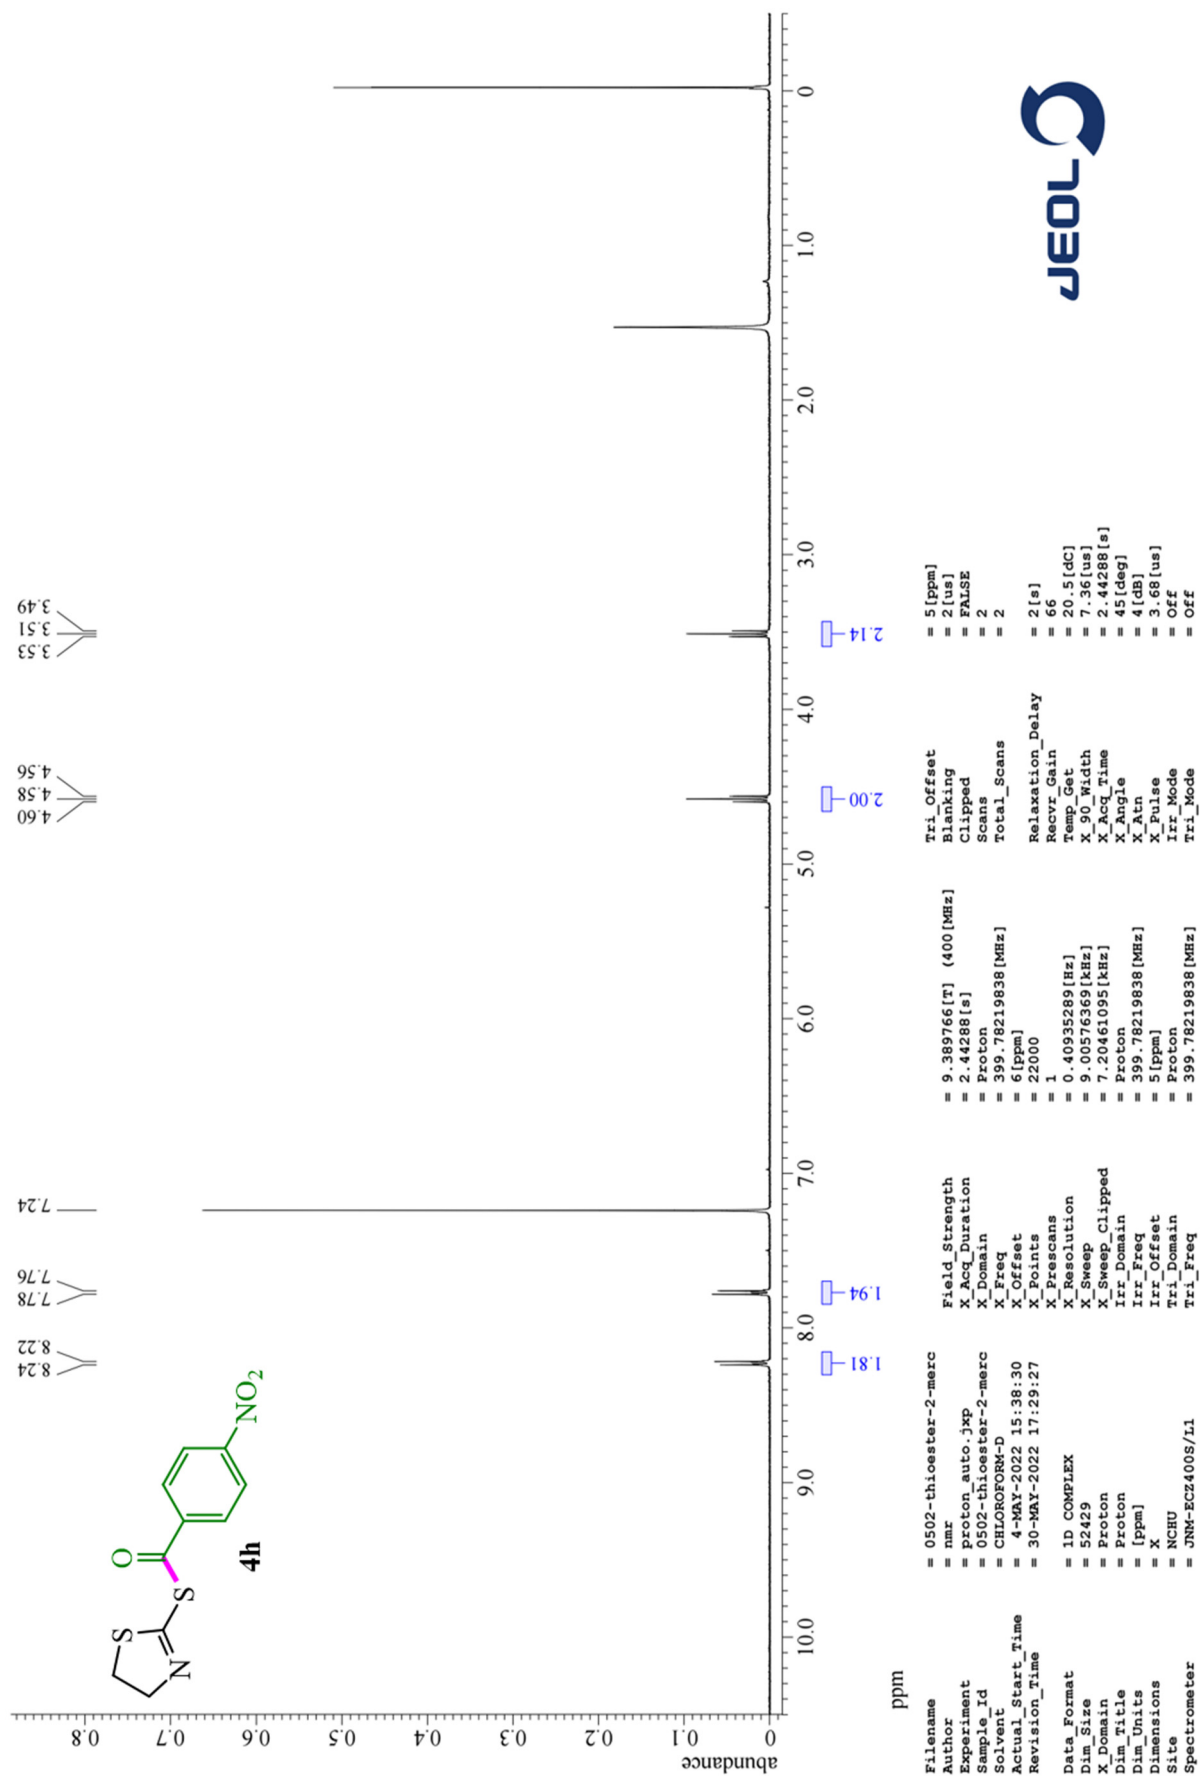

<sup>1</sup>H NMR spectrum of compound **4h** (400 MHz, CDCl<sub>3</sub>)

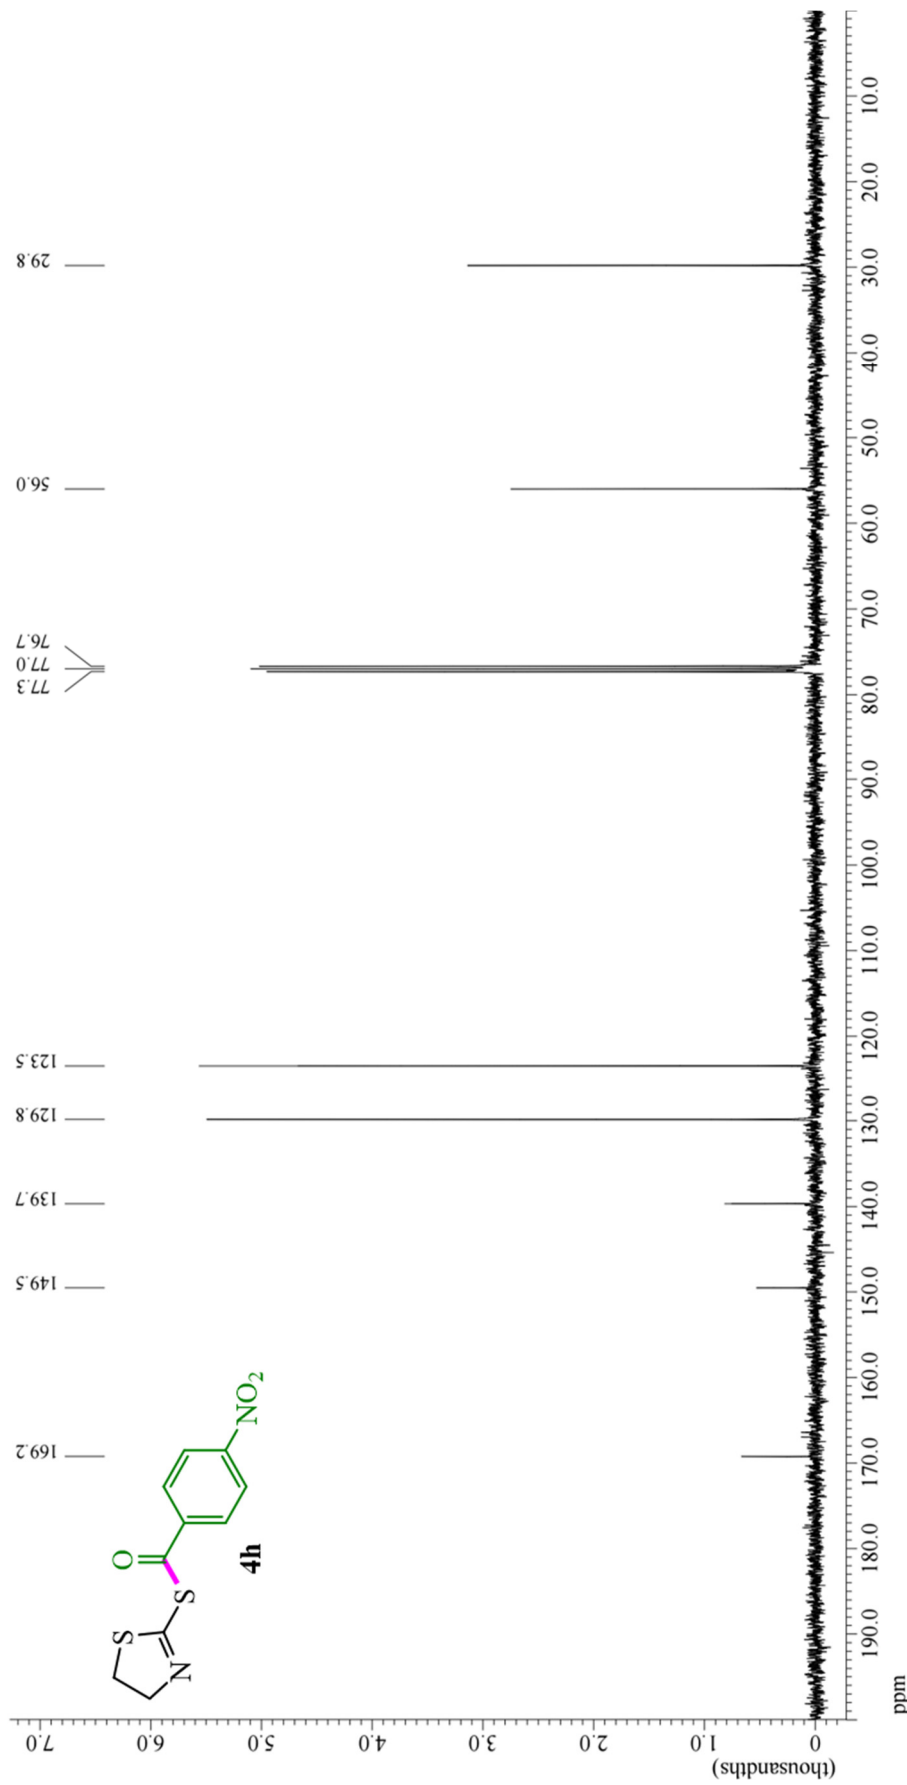

$^{13}\text{C}\{^1\text{H}\}$  NMR spectrum of compound **4h** (100 MHz,  $\text{CDCl}_3$ )

Filename = 0502-thioester-2-m  
 Author = nmr  
 Experiment = carbon\_auto.jpg  
 Sample\_Id = 0502-thioester-lin  
 Solvent = CHLOROFORM-D  
 Actual\_Start\_Time = 1-JUN-2022 17:02  
 Revision\_Time = 1-JUN-2022 23:42  
 Data\_Format = 1D COMPLEX  
 Din\_Size = 52429  
 X\_Domain = Carbon13  
 Dim\_Title = [ppm]  
 Dim\_Units = X  
 Dimensions = X  
 Site = NCHU  
 Spectrometer = JNM-ECZ400S/L1

Field Strength = 9.389766[T] (400[M]  
 X\_Acq\_Duration = 0.6336[s]  
 X\_Domain = Carbon13  
 X\_Freq = 100.52530333[MHz]  
 X\_Offset = 100[ppm]  
 X\_Points = 20000  
 X\_Prescans = 4  
 X\_Resolution = 1.57828283[Hz]  
 X\_Sweep = 31.56565657[kHz]  
 X\_Sweep\_Clippped = 25.25252525[kHz]  
 Irr\_Domain = Proton  
 Irr\_Freq = 399.78219838[MHz]  
 Irr\_Offset = 5[ppm]  
 Blanking = FALSE  
 Clipped = FALSE

Scans = 134  
 Total\_Scans = 134  
 Relaxation\_Delay = 2[s]  
 Recvr\_Gain = 50  
 Temp\_Get = 22.4[dc]  
 X\_90\_Width = 10.35[us]  
 X\_Acq\_Time = 0.6336[s]  
 X\_Angle = 40[deg]  
 X\_Atn = 7.8[db]  
 X\_Pulse = 4.6[us]  
 Irr\_Atn\_Dec = 27.876[db]  
 Irr\_Atn\_Dec\_Calc = 27.876[db]  
 Irr\_Atn\_Dec\_Default\_Calc = 27.876[db]  
 Irr\_Atn\_Noise = 27.876[db]  
 Irr\_Dec\_Bandwidth\_Hz = 4.7826087[kHz]

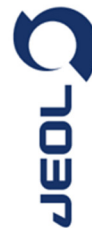

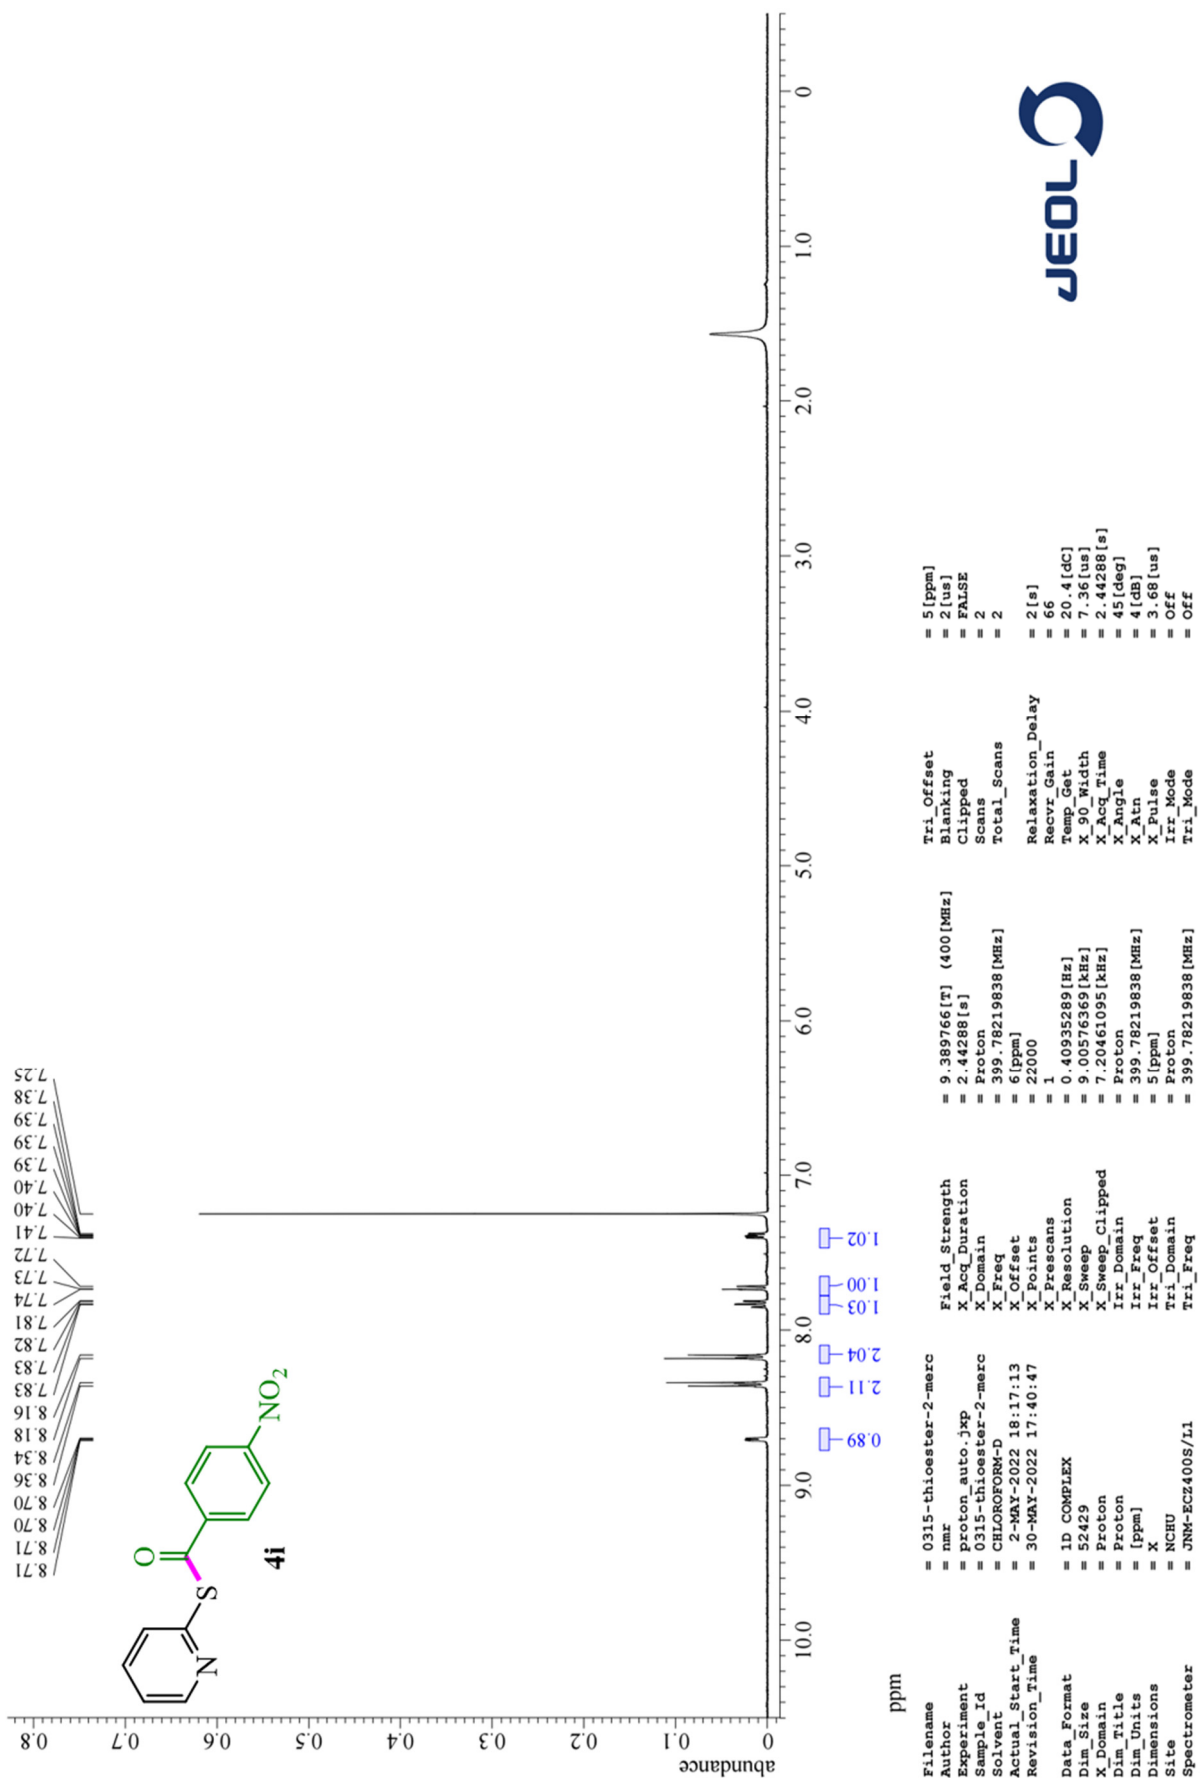

<sup>1</sup>H NMR spectrum of compound **4i** (400 MHz, CDCl<sub>3</sub>)



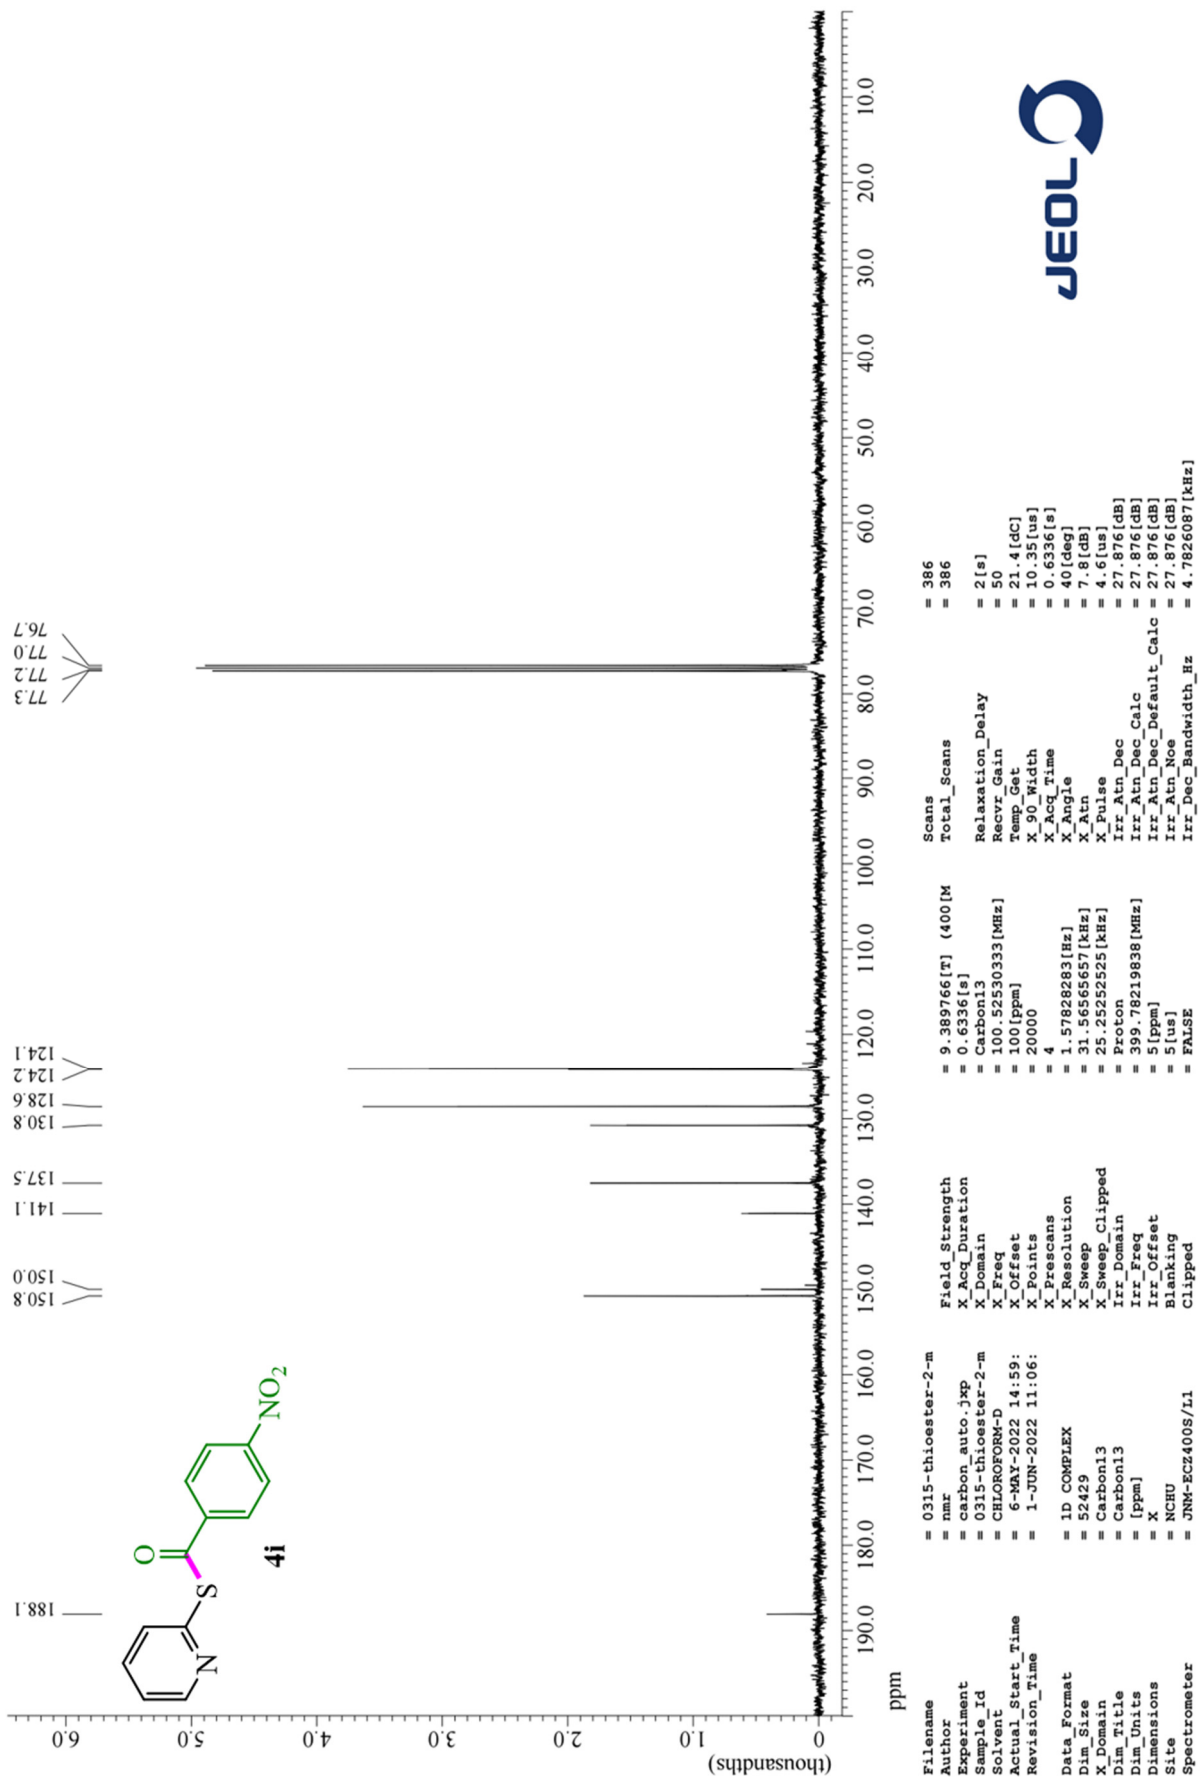

$^{13}\text{C}\{^1\text{H}\}$  NMR spectrum of compound **4i** (100 MHz,  $\text{CDCl}_3$ )



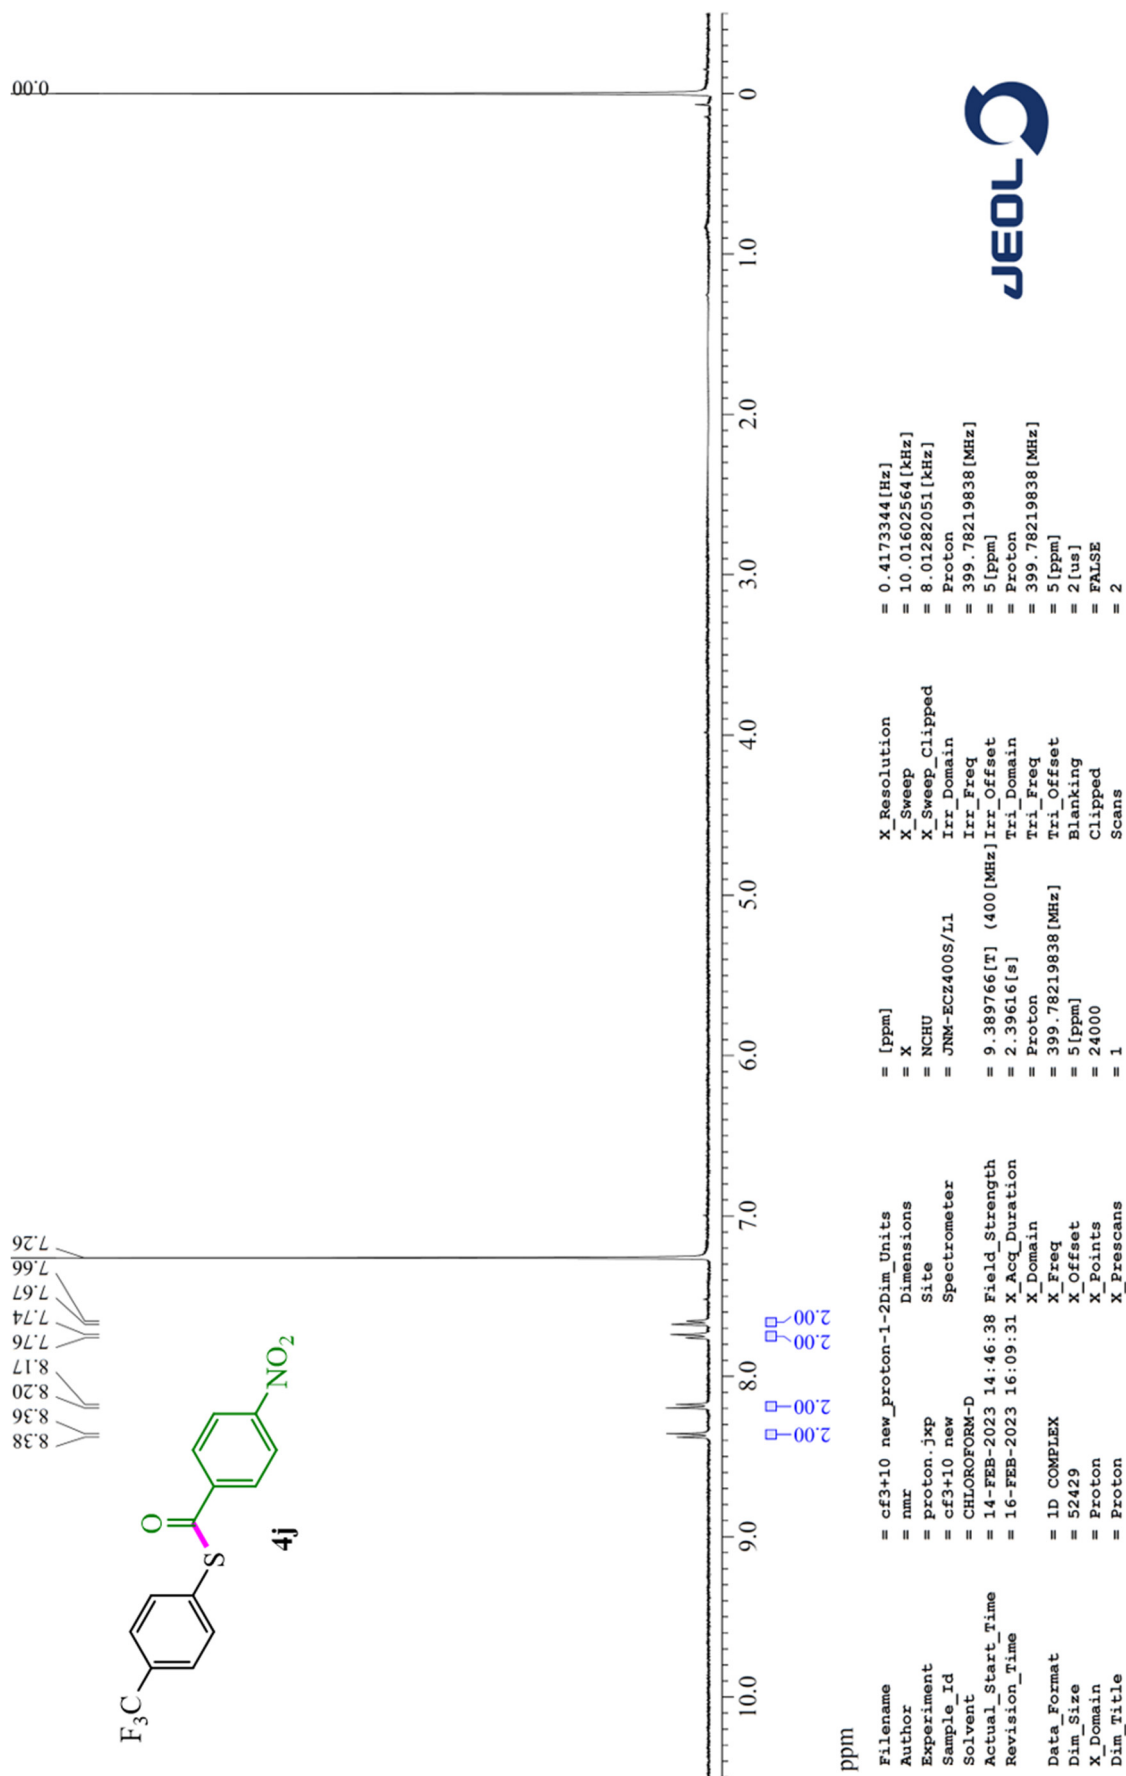

<sup>1</sup>H NMR spectrum of compound **4j** (400 MHz, CDCl<sub>3</sub>)



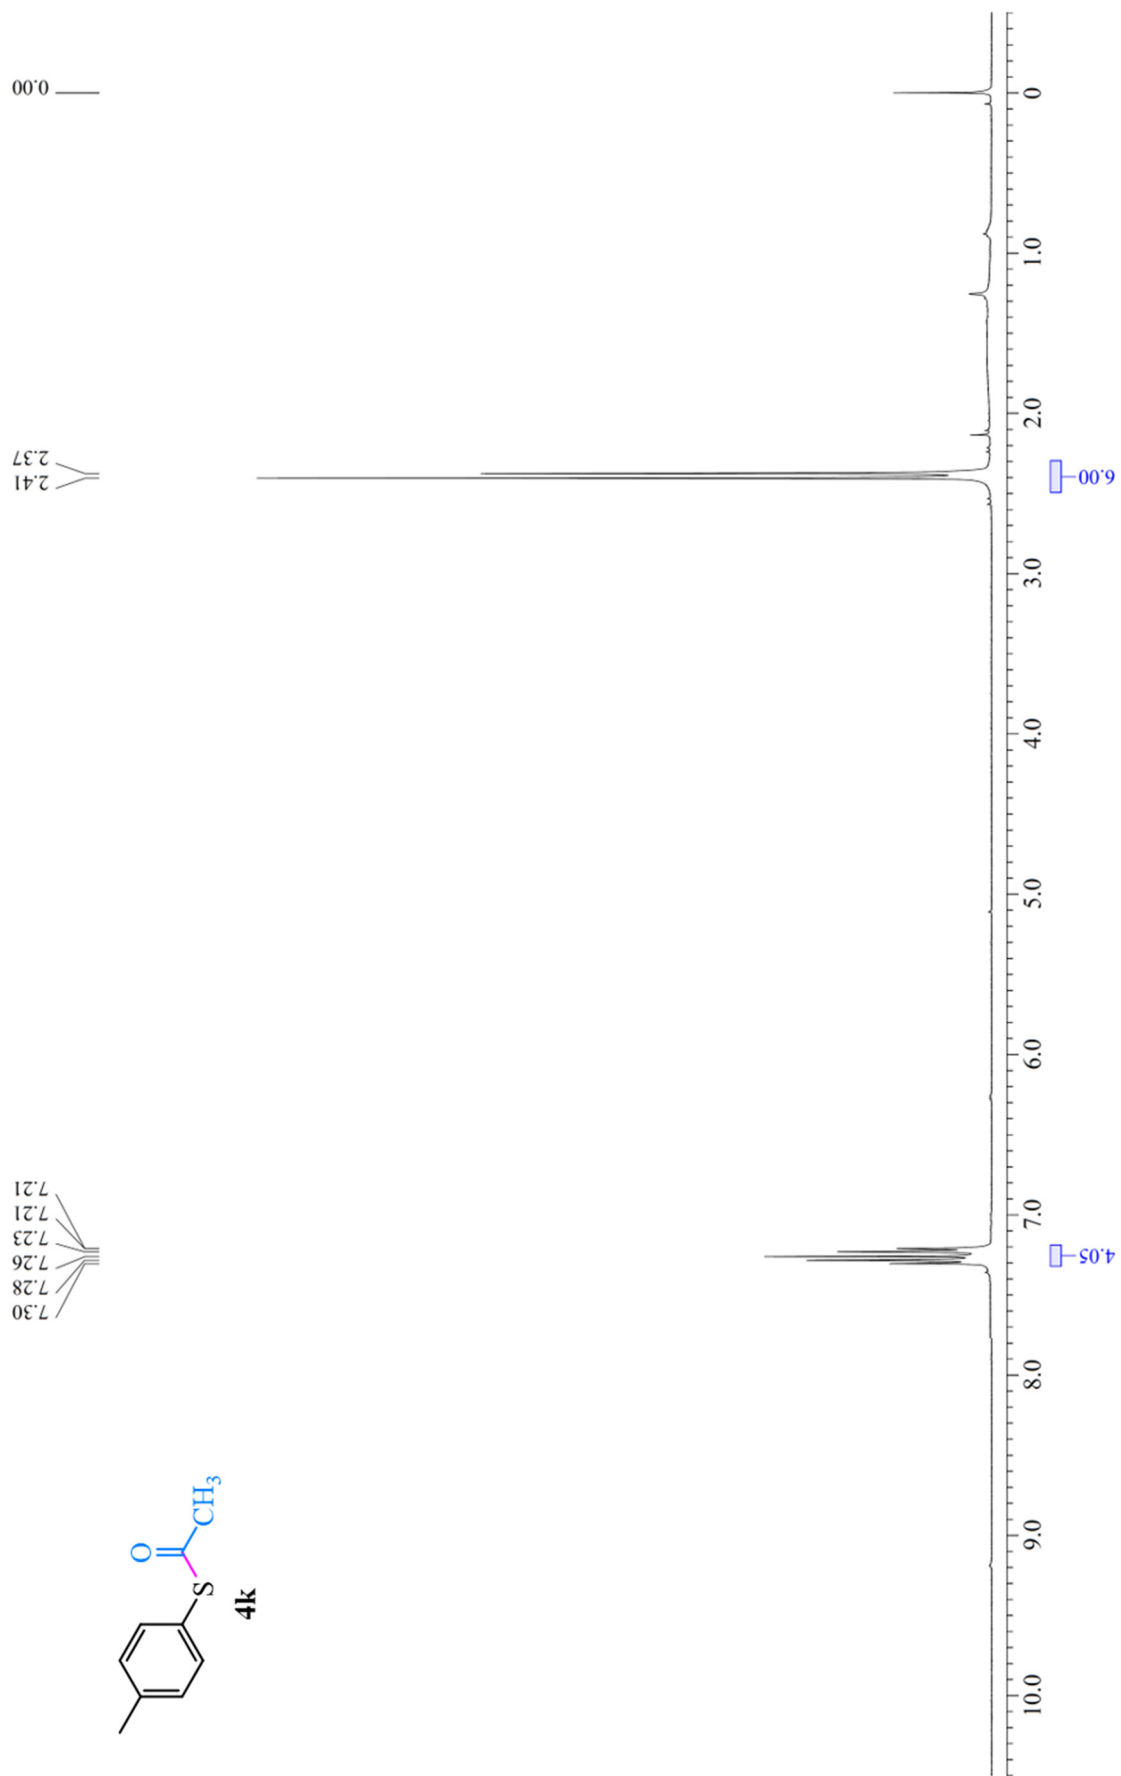

$^1\text{H}$  NMR spectrum of compound **4k** (400 MHz,  $\text{CDCl}_3$ )

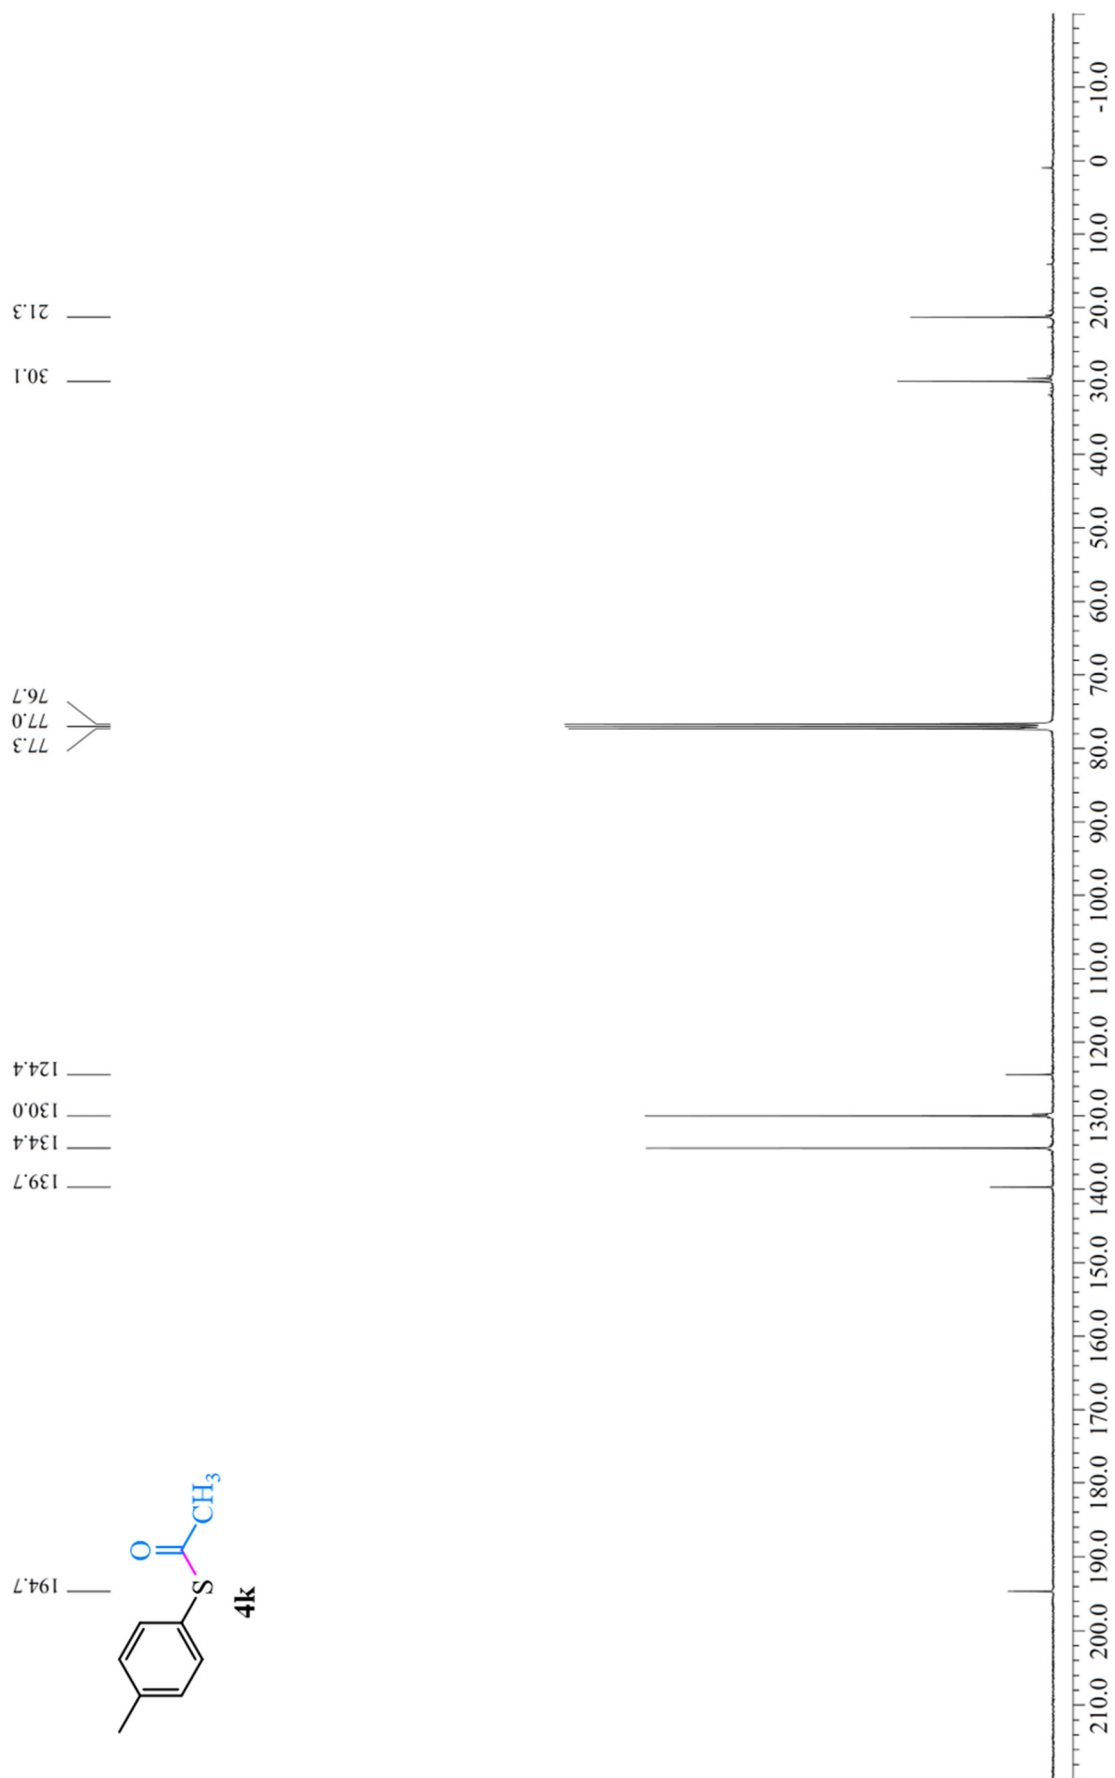

<sup>13</sup>C {H} NMR spectrum of compound **4k** (100 MHz, CDCl<sub>3</sub>)

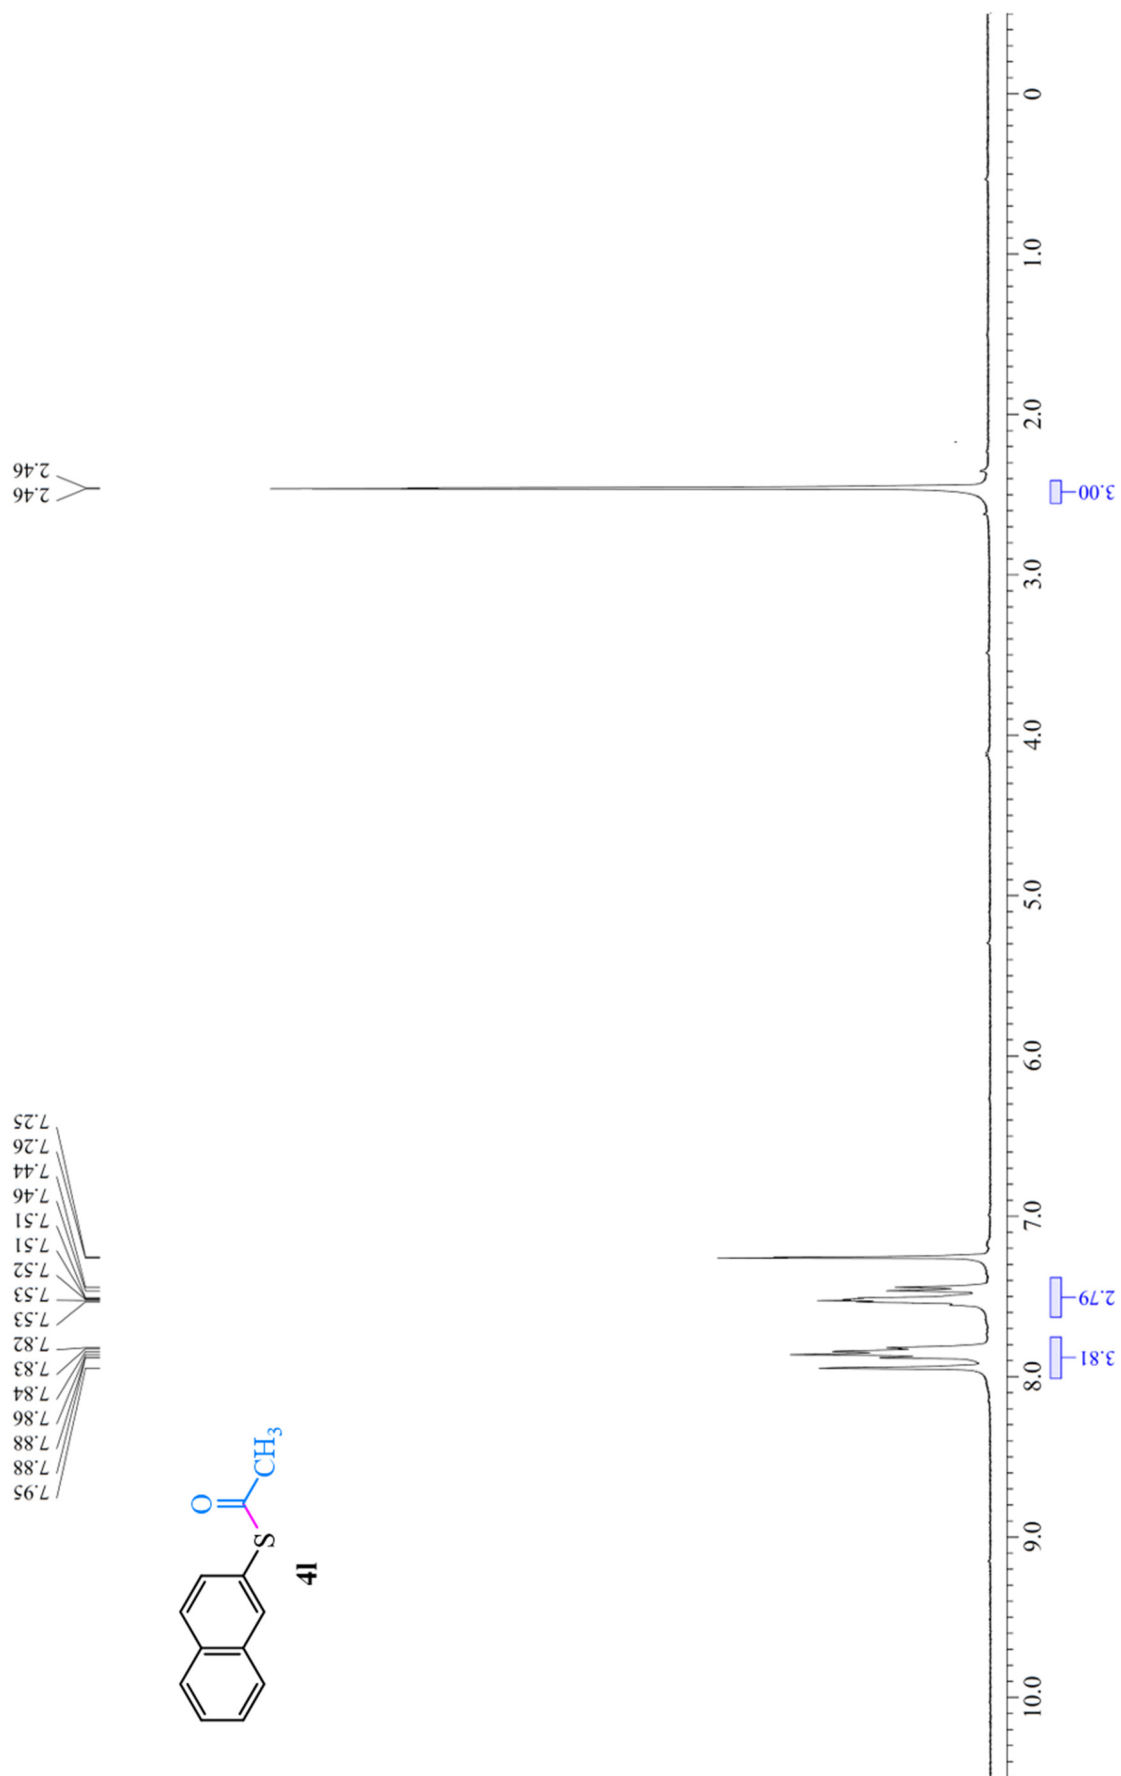

<sup>1</sup>H NMR spectrum of compound **4I** (400 MHz, CDCl<sub>3</sub>)

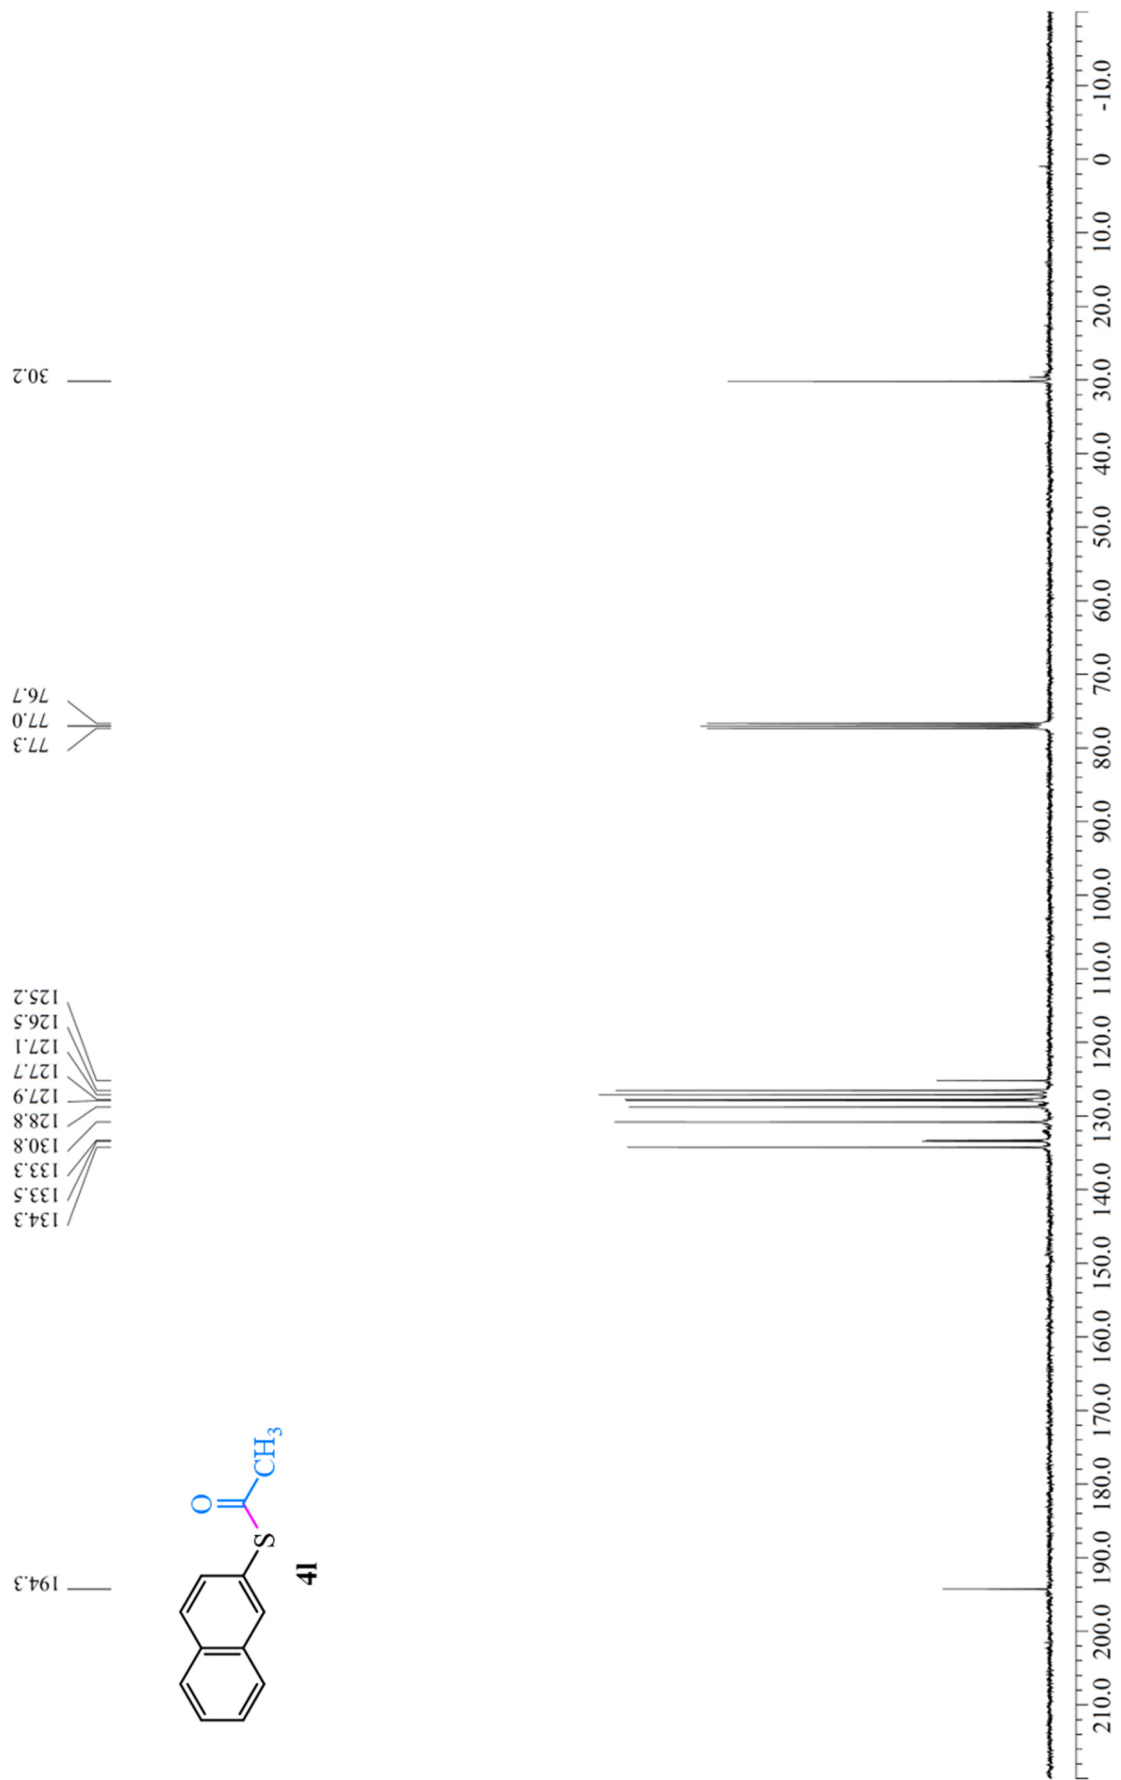

<sup>13</sup>C{H} NMR spectrum of compound **4I** (100 MHz, CDCl<sub>3</sub>)

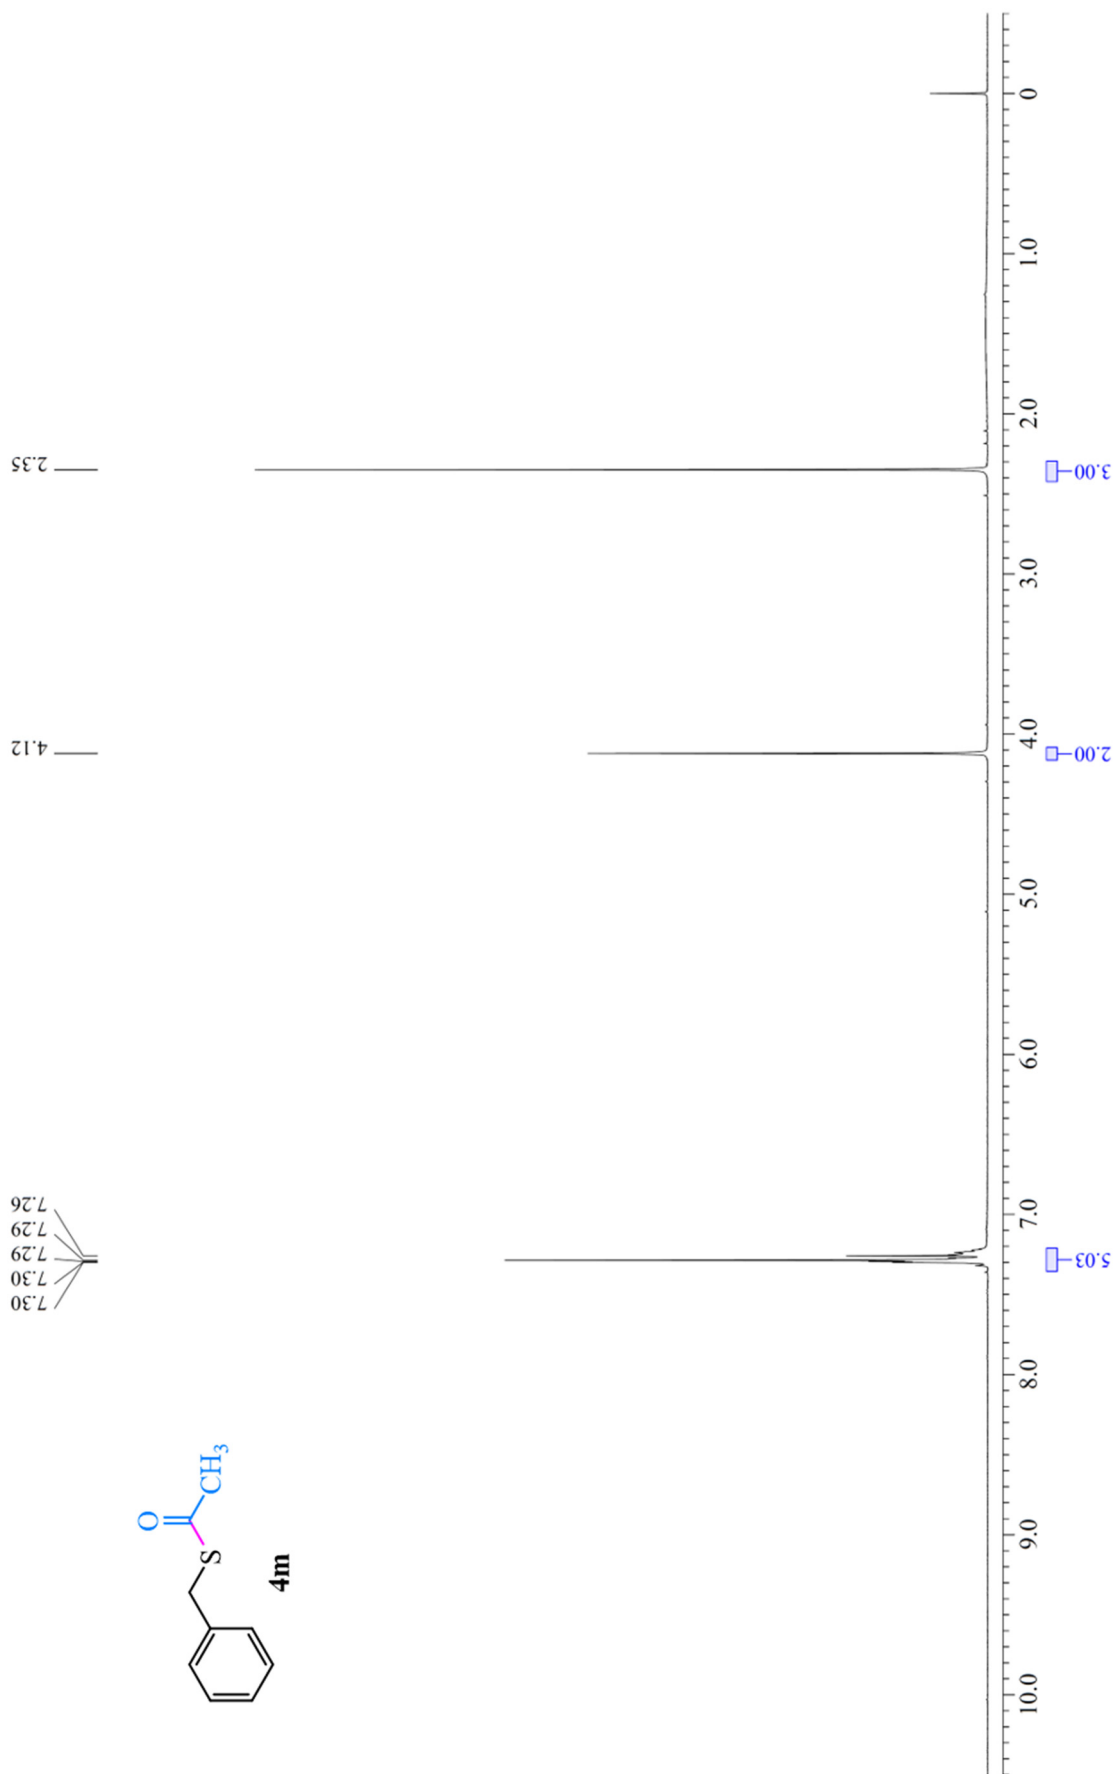

$^1\text{H}$  NMR spectrum of compound **4m** (400 MHz,  $\text{CDCl}_3$ )

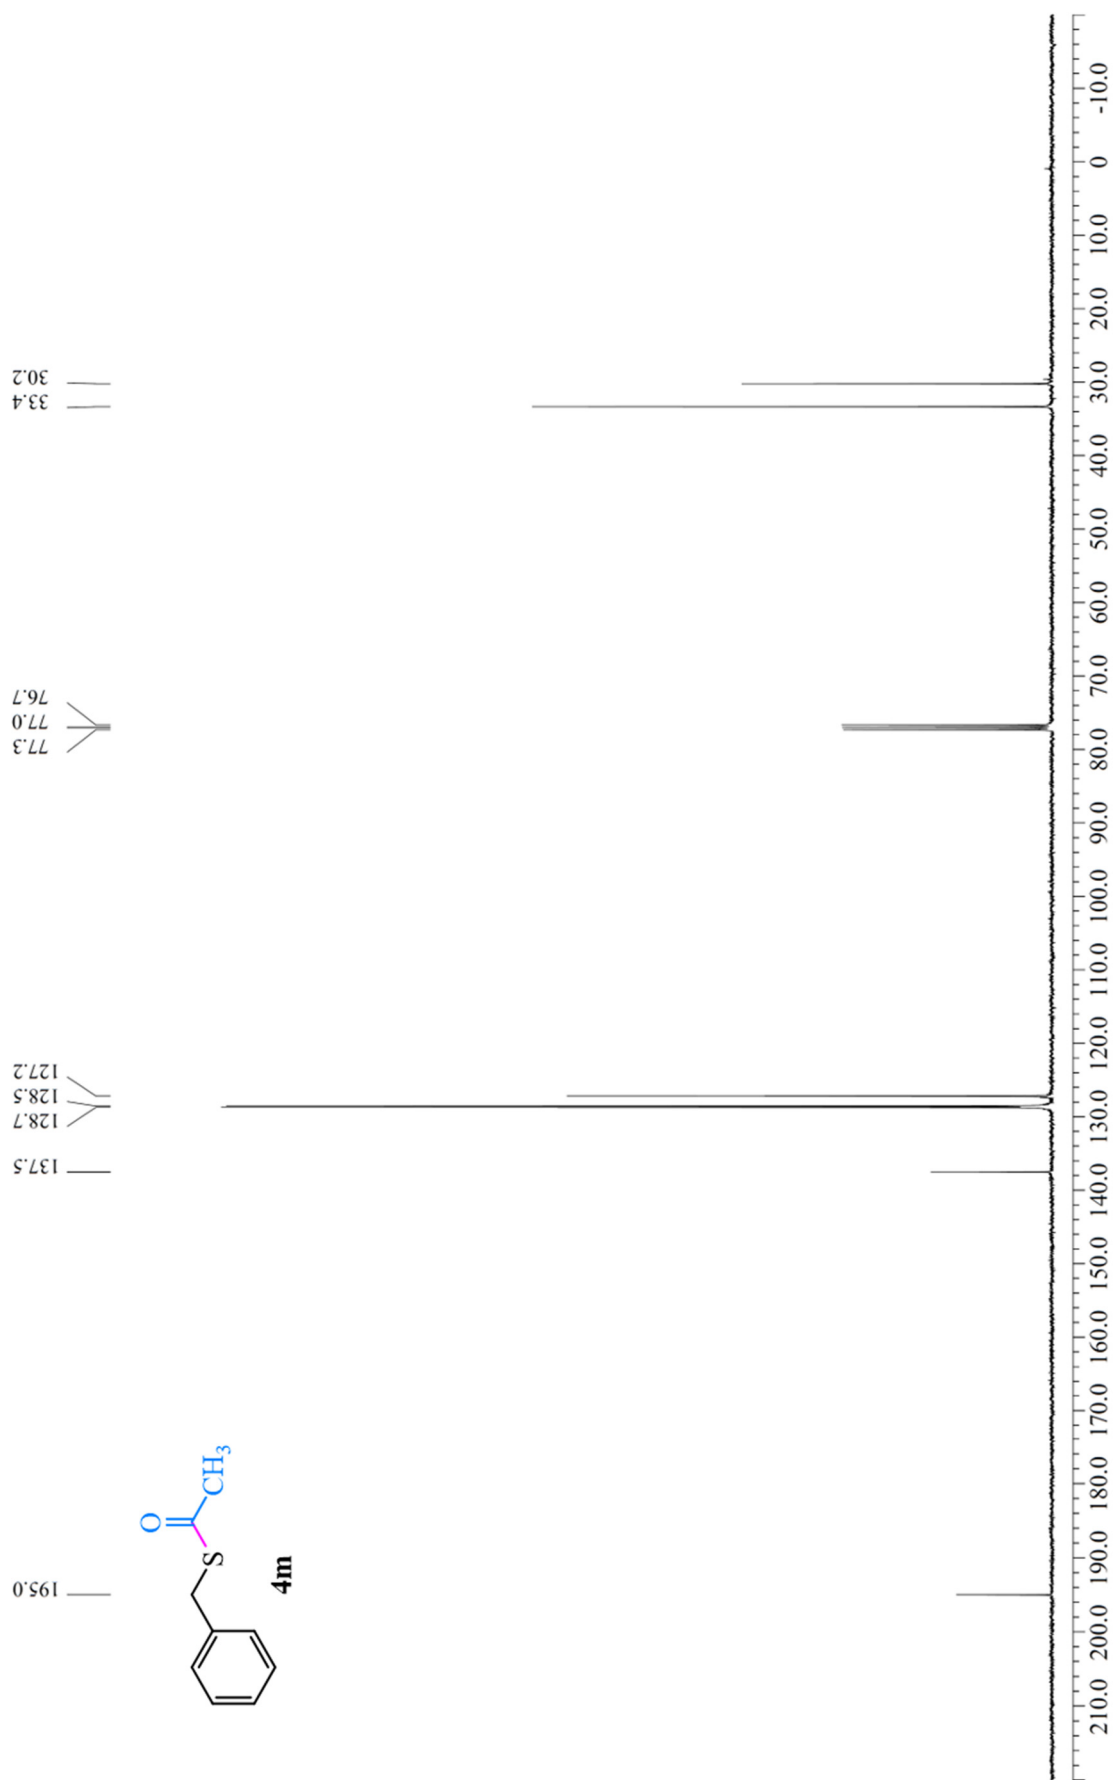

$^{13}\text{C}\{^1\text{H}\}$  NMR spectrum of compound **4m** (100 MHz, CDCl<sub>3</sub>)



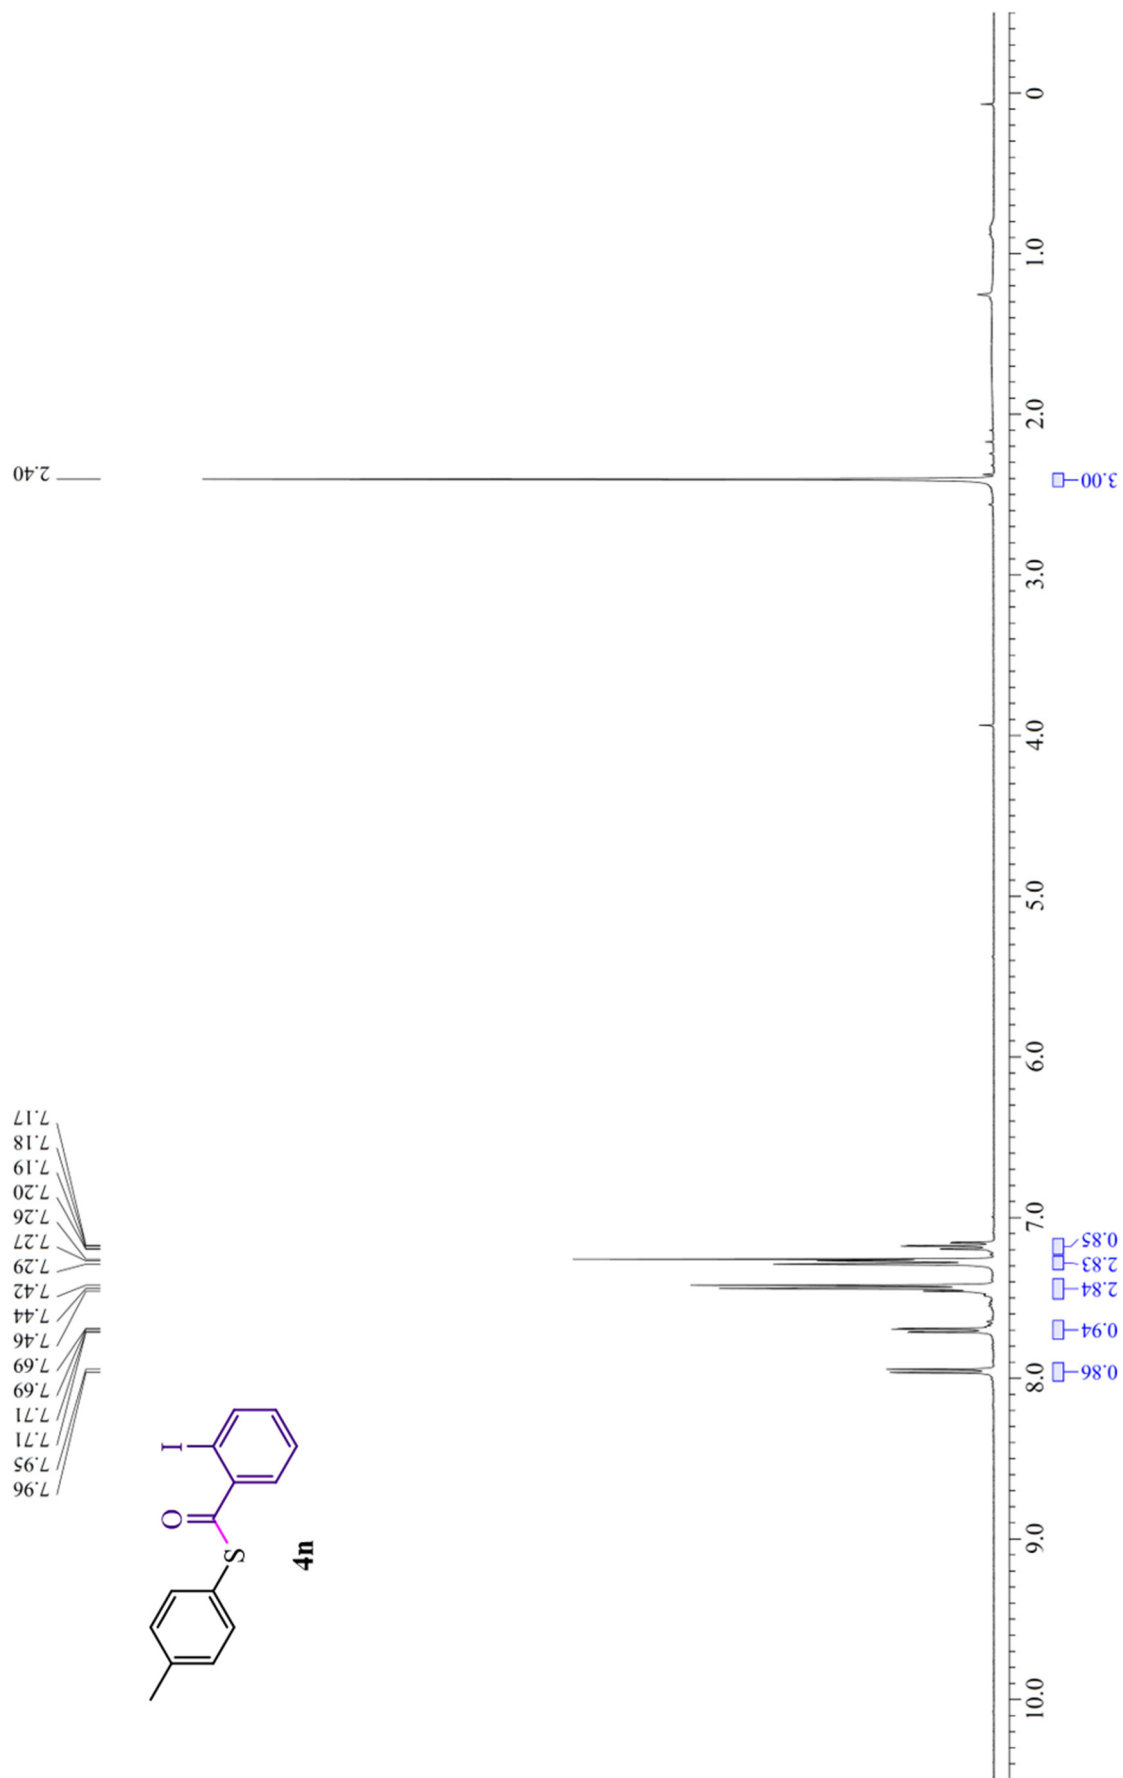

<sup>1</sup>H NMR spectrum of compound **4n** (400 MHz, CDCl<sub>3</sub>)

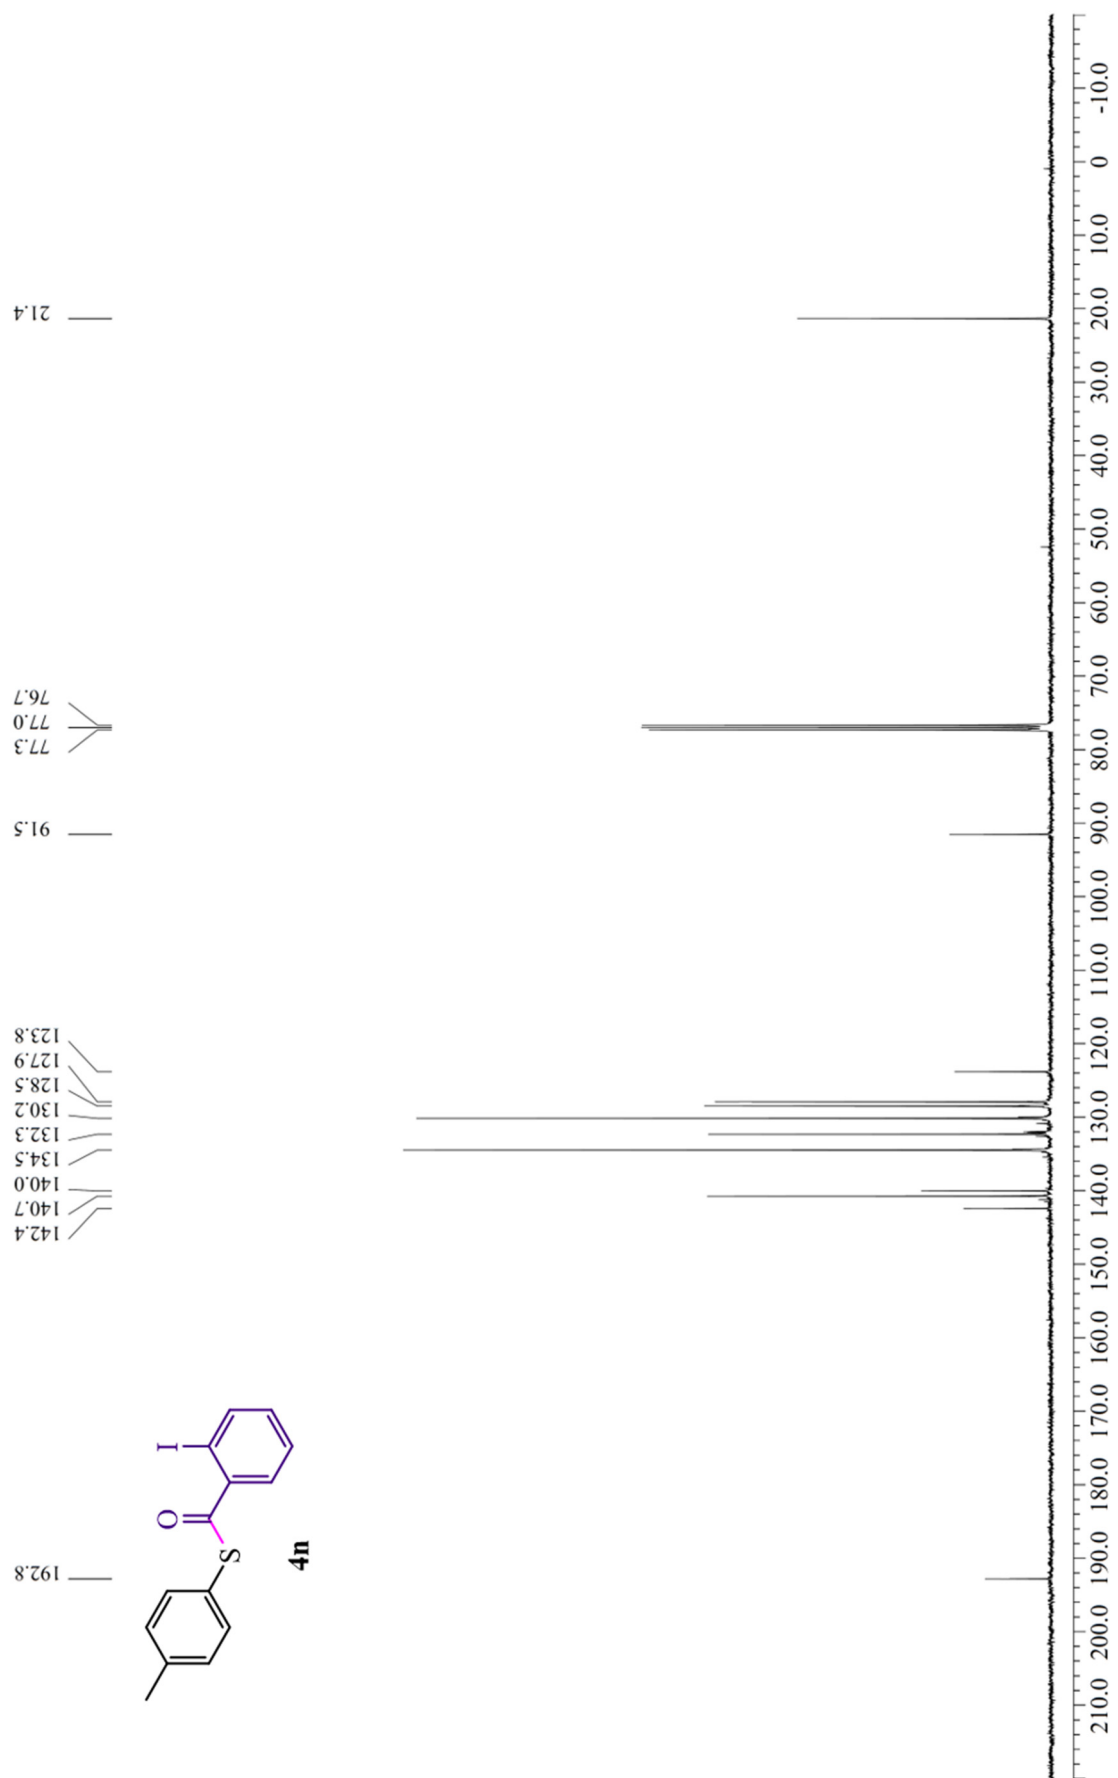

$^{13}\text{C}\{^1\text{H}\}$  NMR spectrum of compound **4n** (100 MHz,  $\text{CDCl}_3$ )

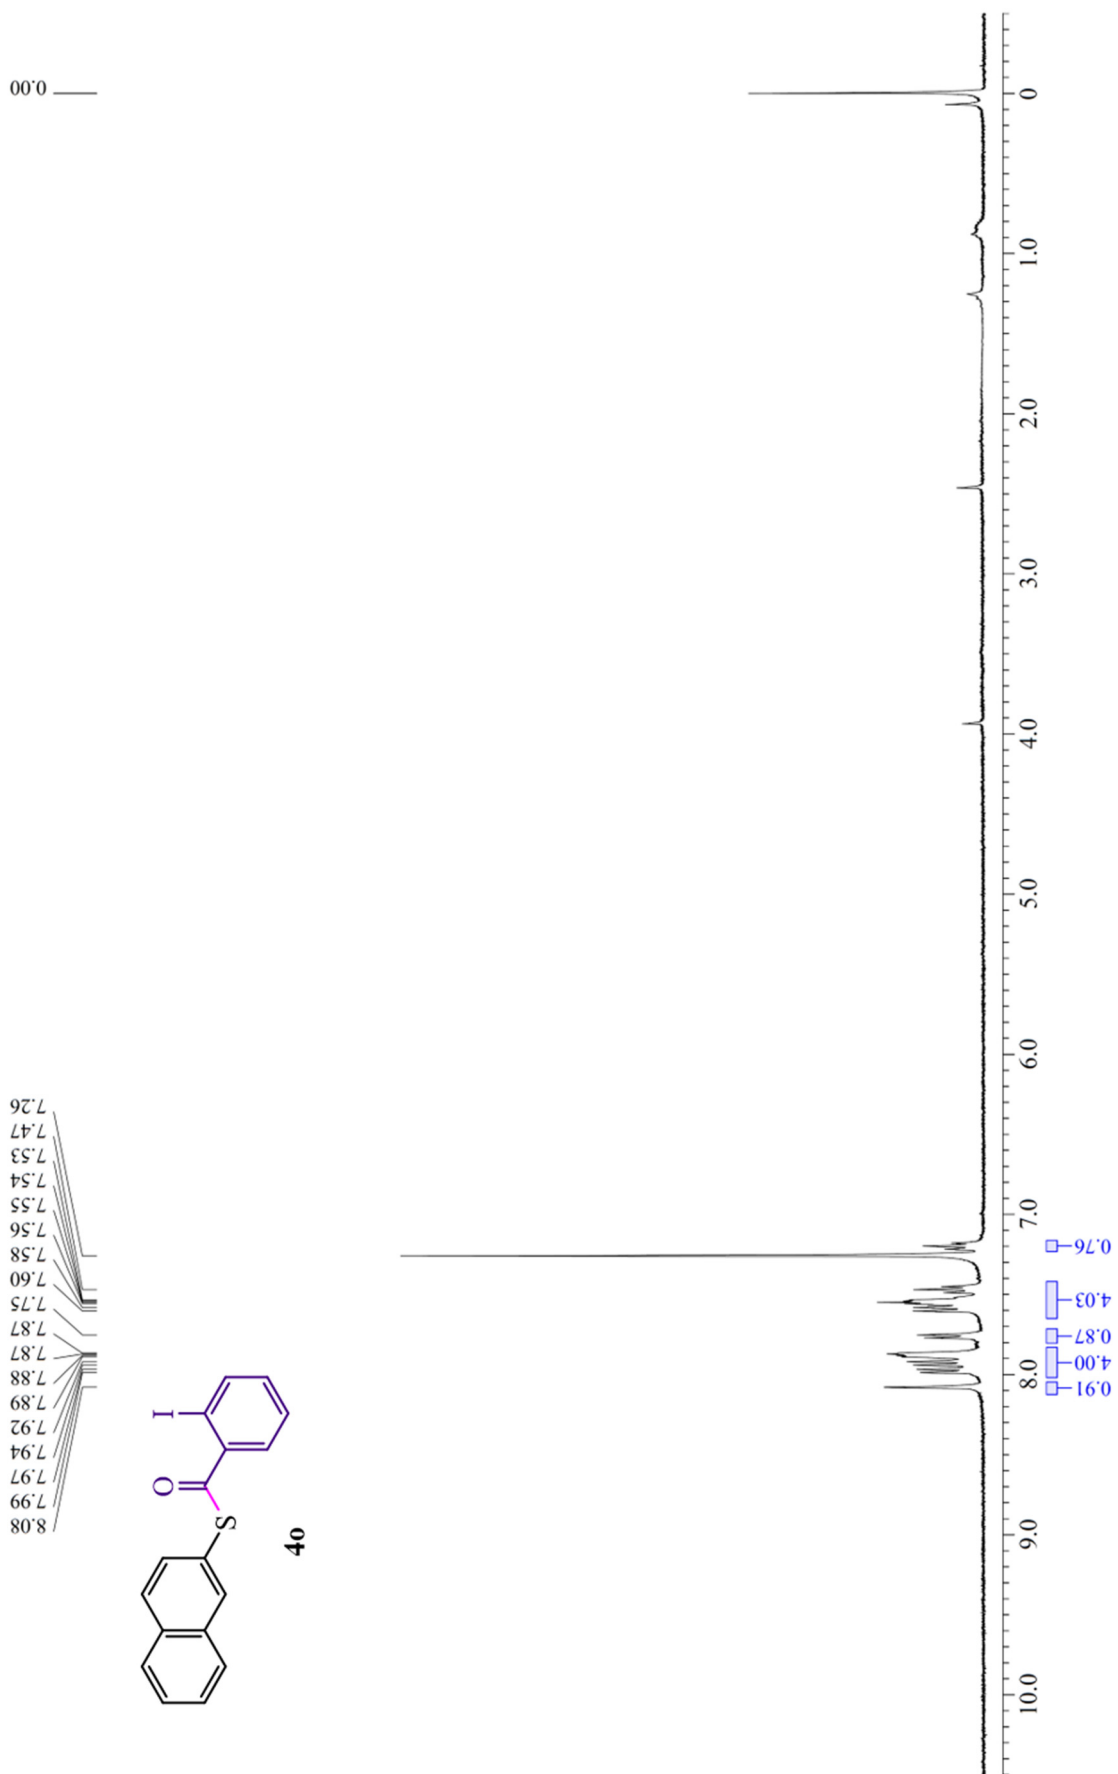

$^1\text{H}$  NMR spectrum of compound **4o** (400 MHz,  $\text{CDCl}_3$ )

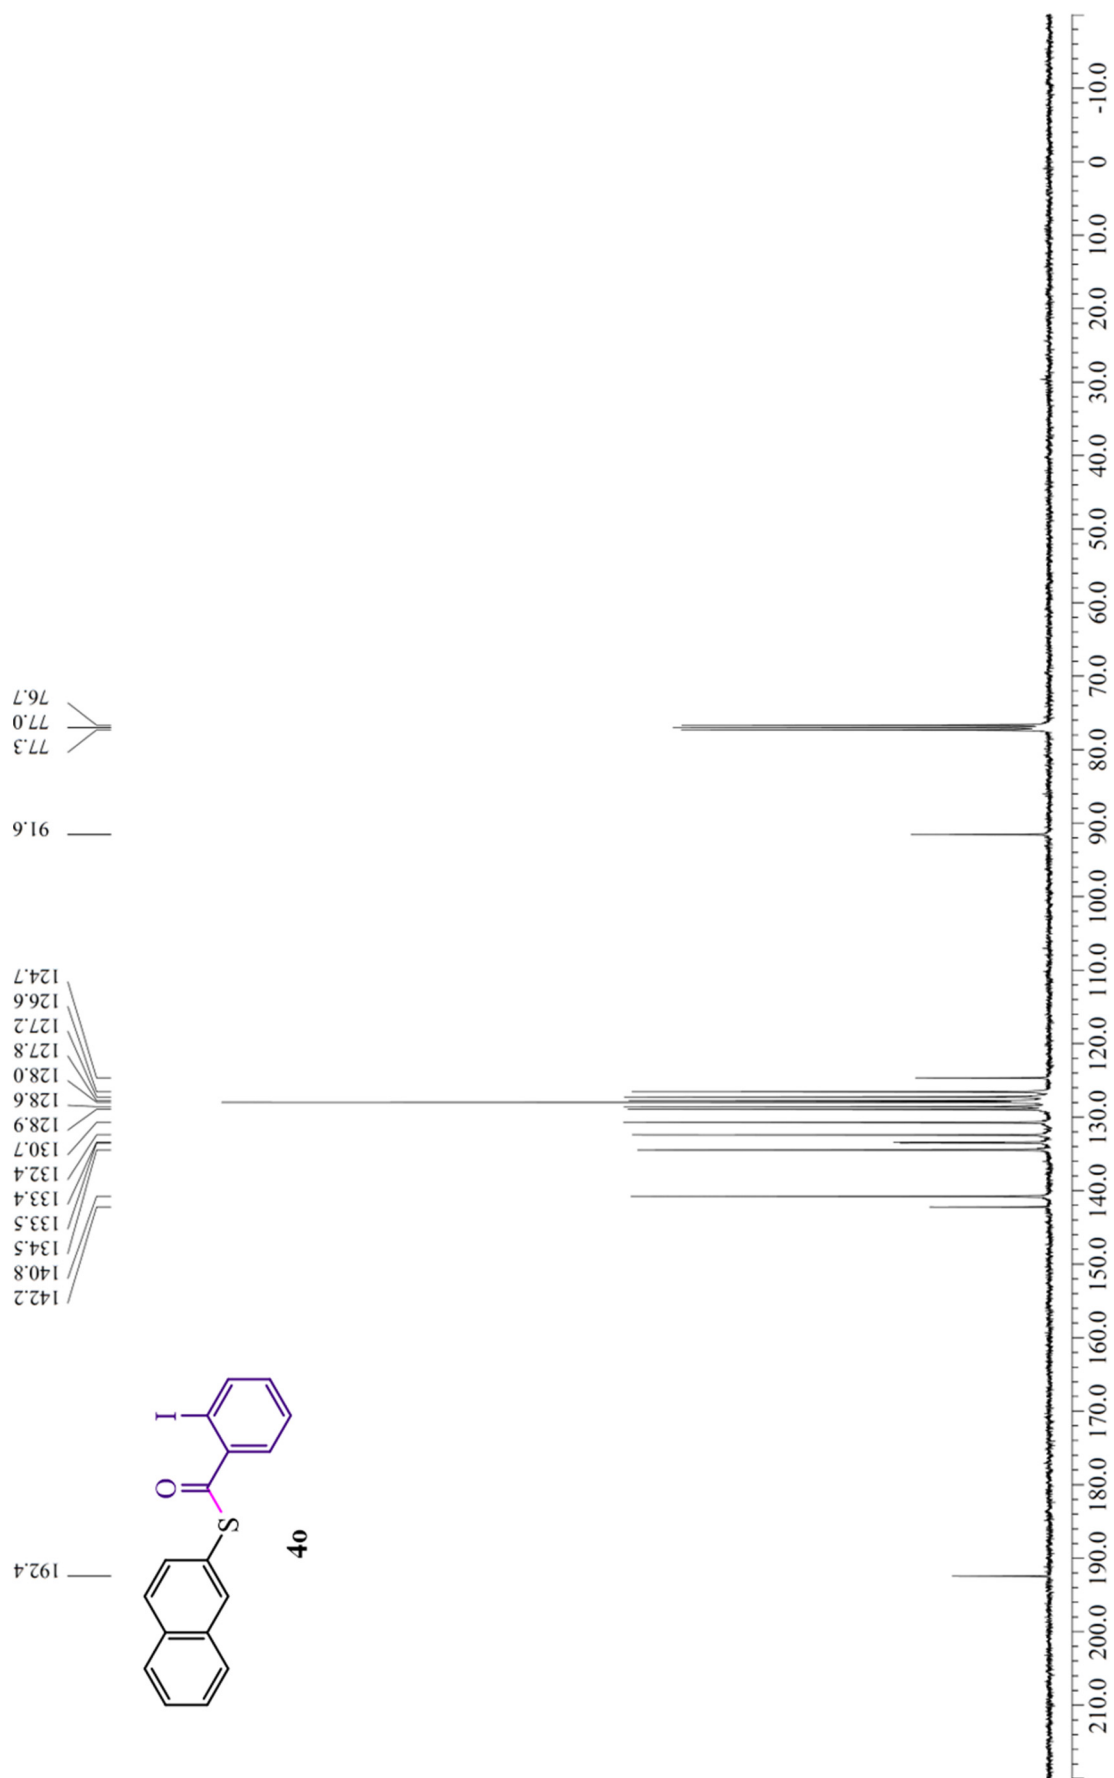

$^{13}\text{C}\{^1\text{H}\}$  NMR spectrum of compound **4o** (100 MHz,  $\text{CDCl}_3$ )

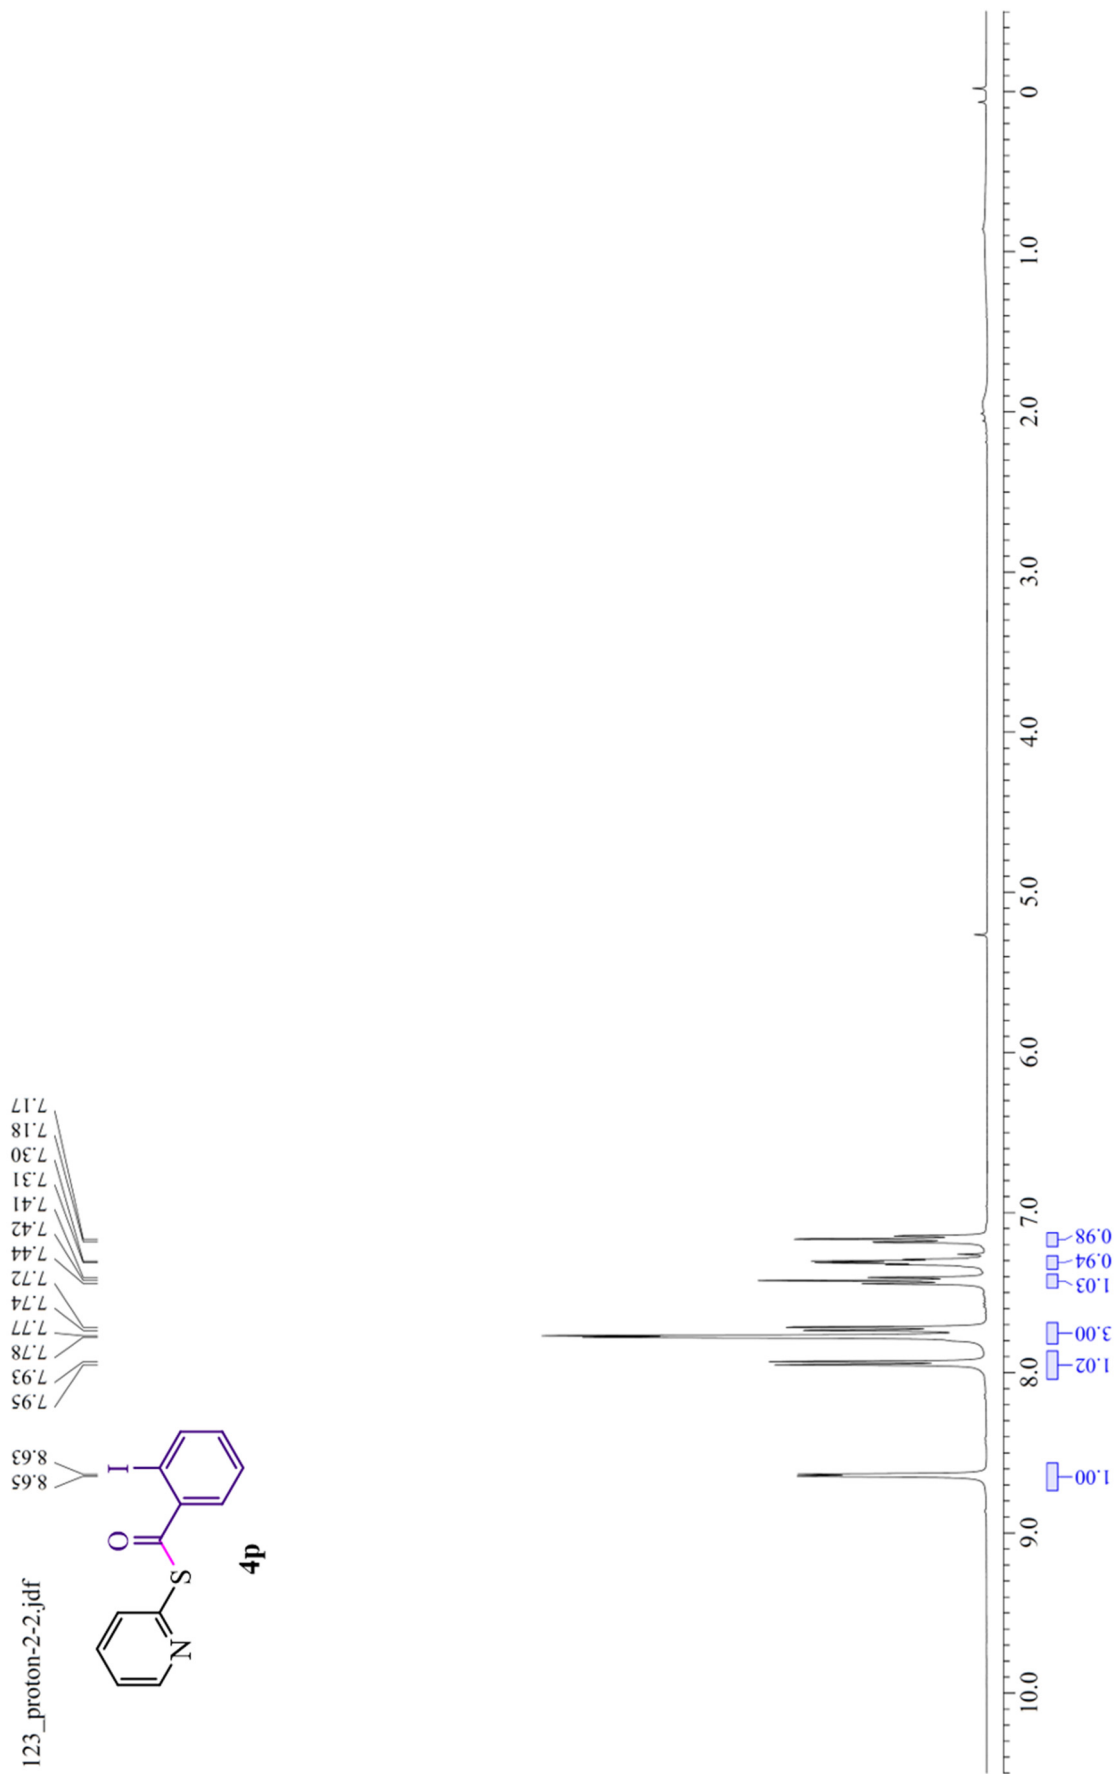

<sup>1</sup>H NMR spectrum of compound **4p** (400 MHz, CDCl<sub>3</sub>)

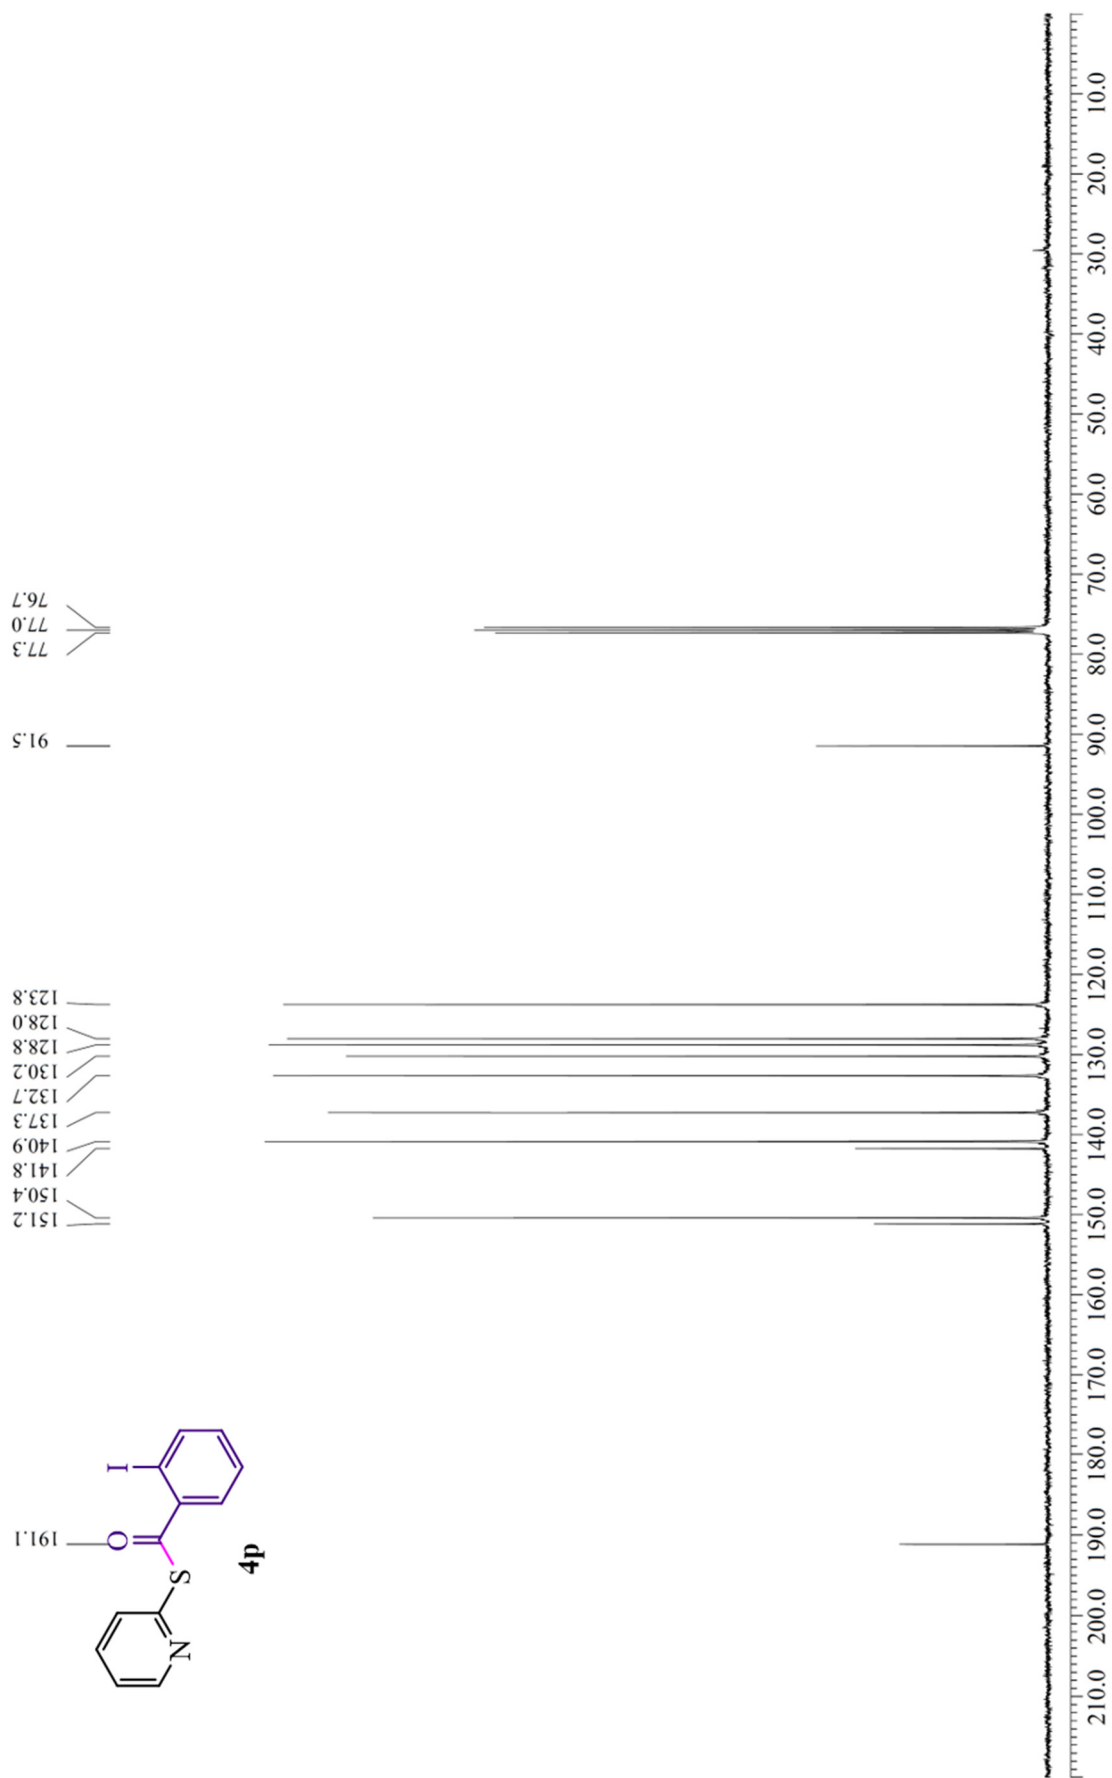

$^{13}\text{C}\{^1\text{H}\}$  NMR spectrum of compound **4p** (100 MHz,  $\text{CDCl}_3$ )

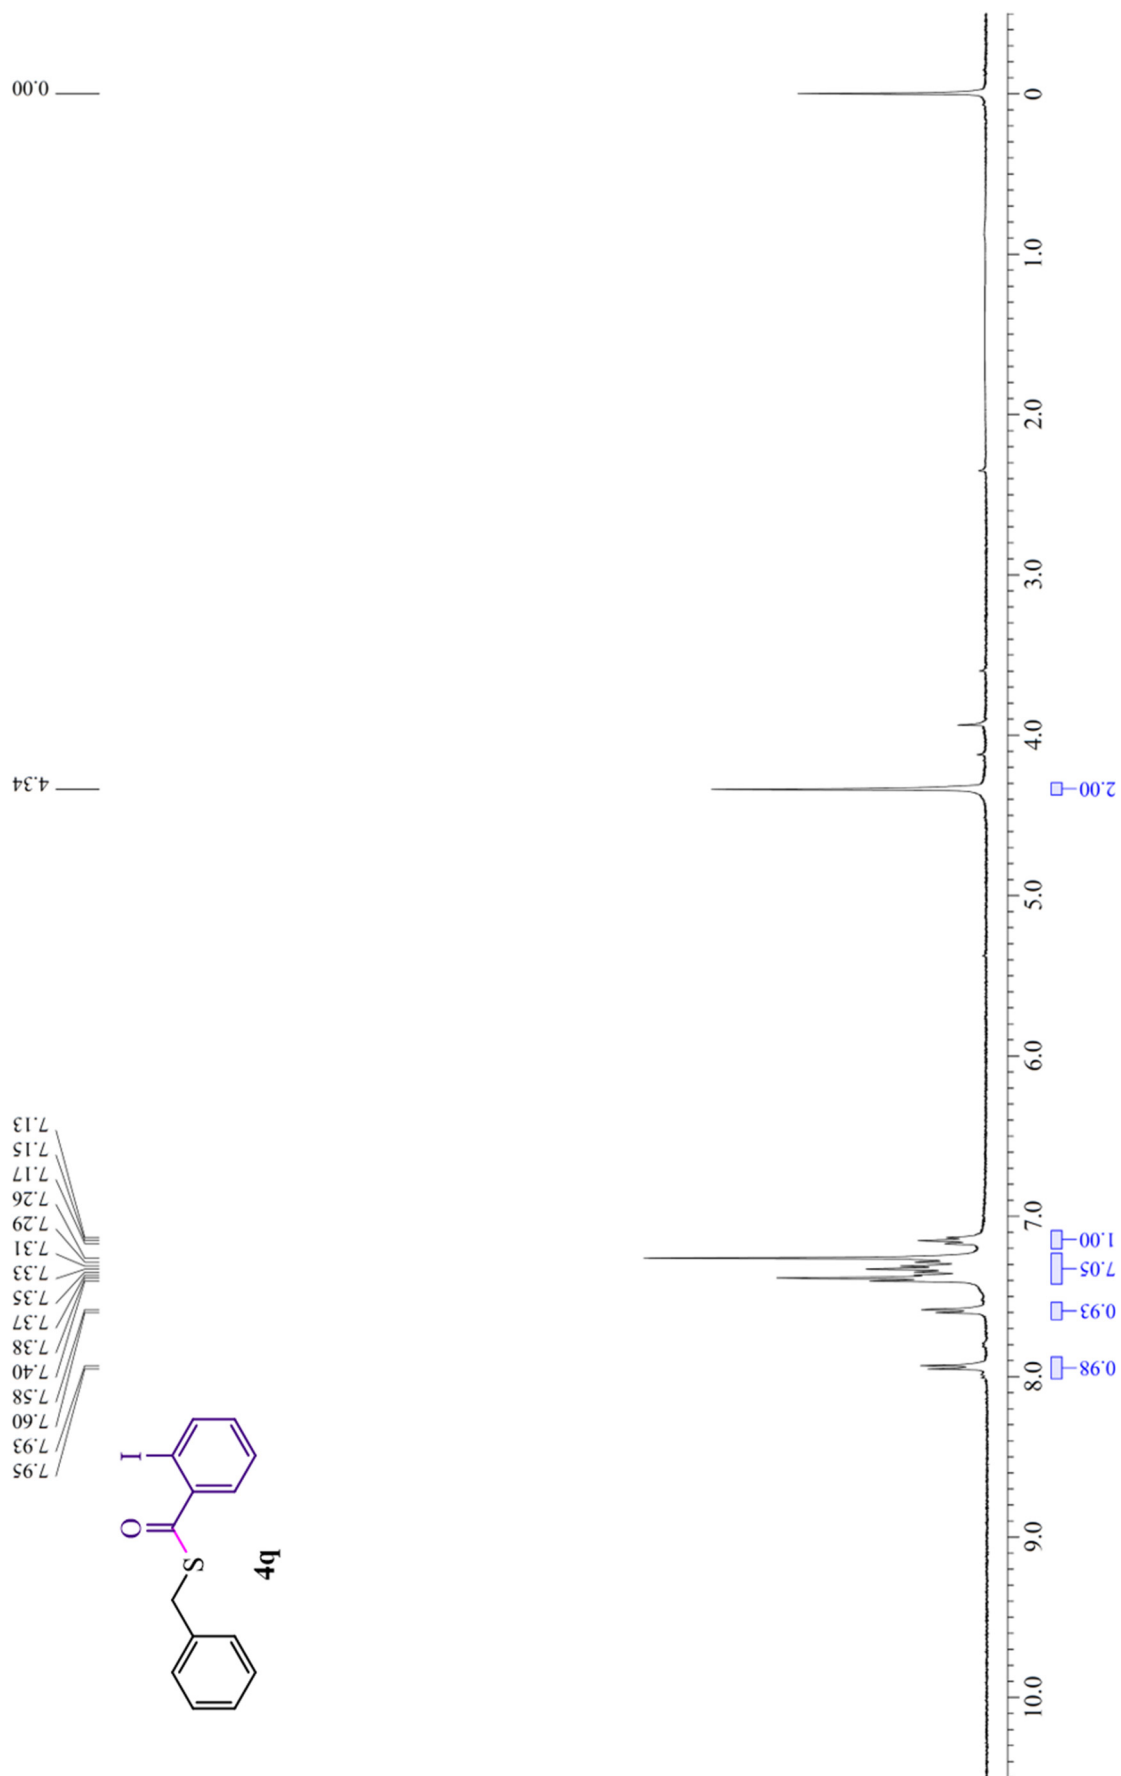

<sup>1</sup>H NMR spectrum of compound **4q** (400 MHz, CDCl<sub>3</sub>)

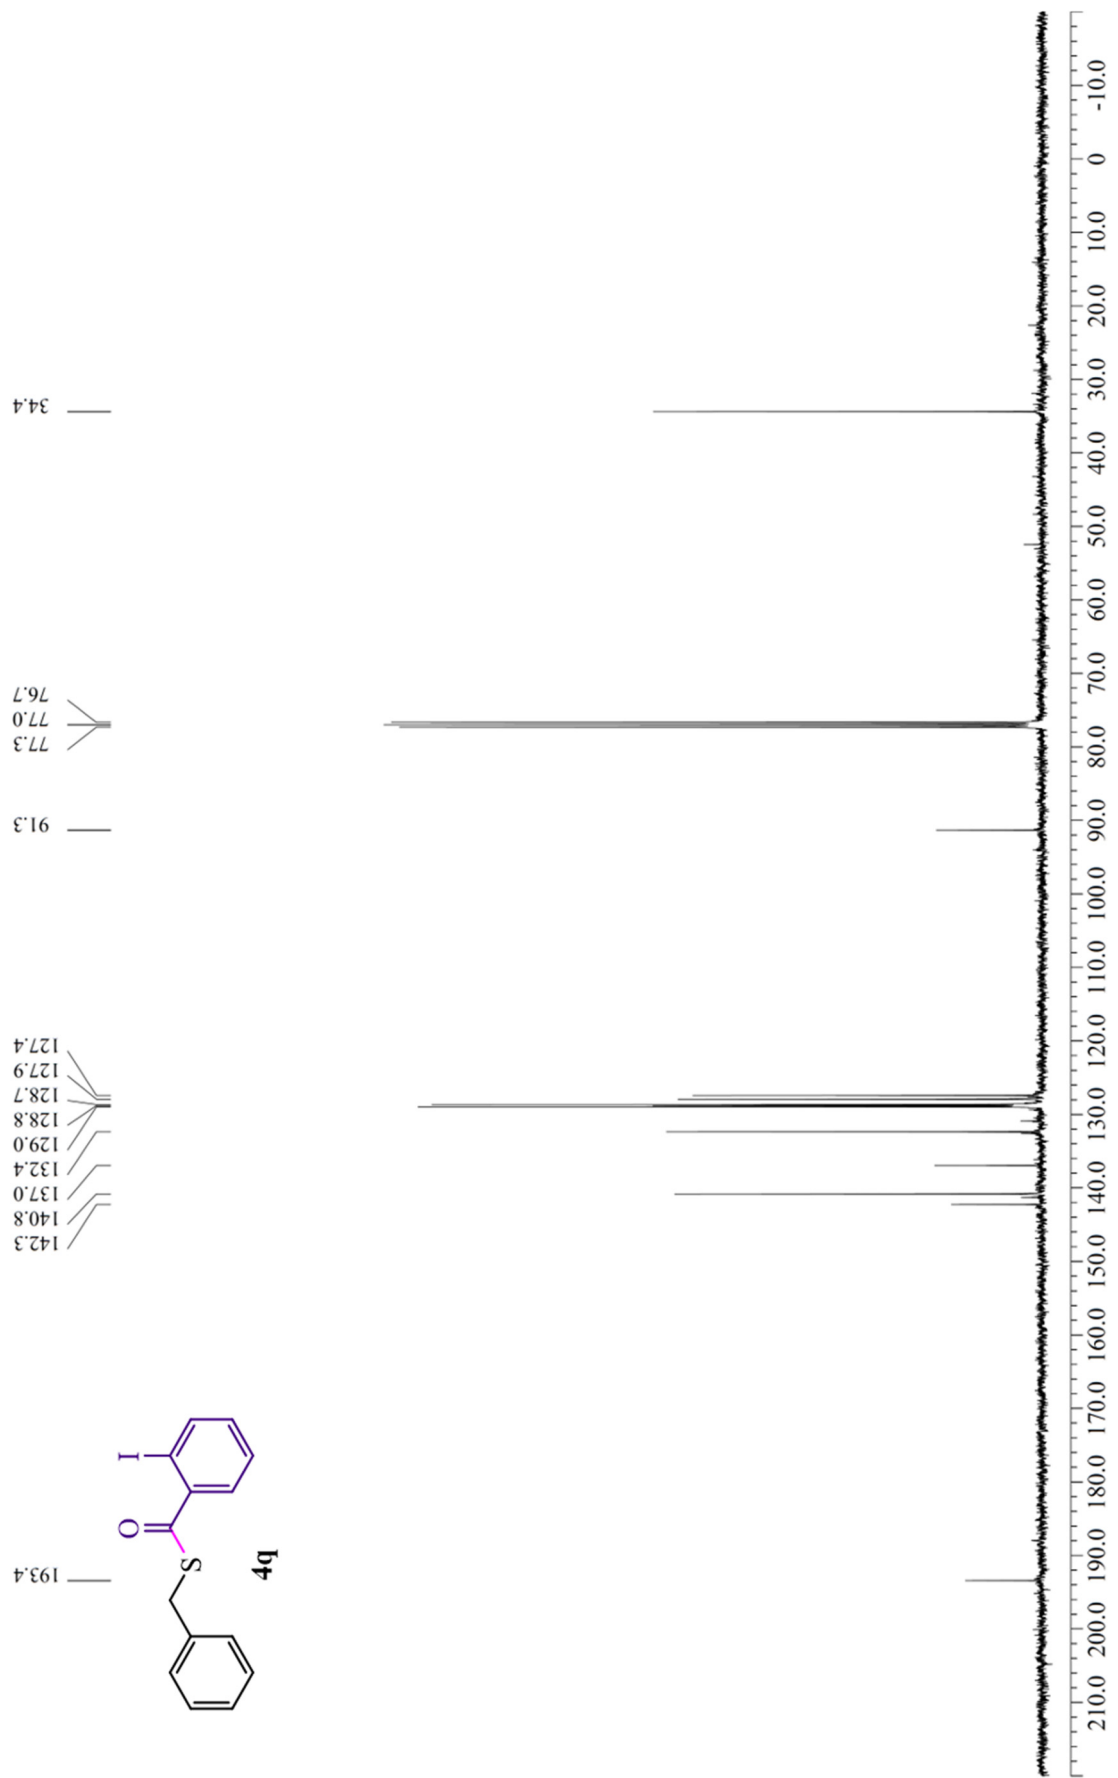

$^{13}\text{C}$  NMR spectrum of compound **4q** (100 MHz,  $\text{CDCl}_3$ )



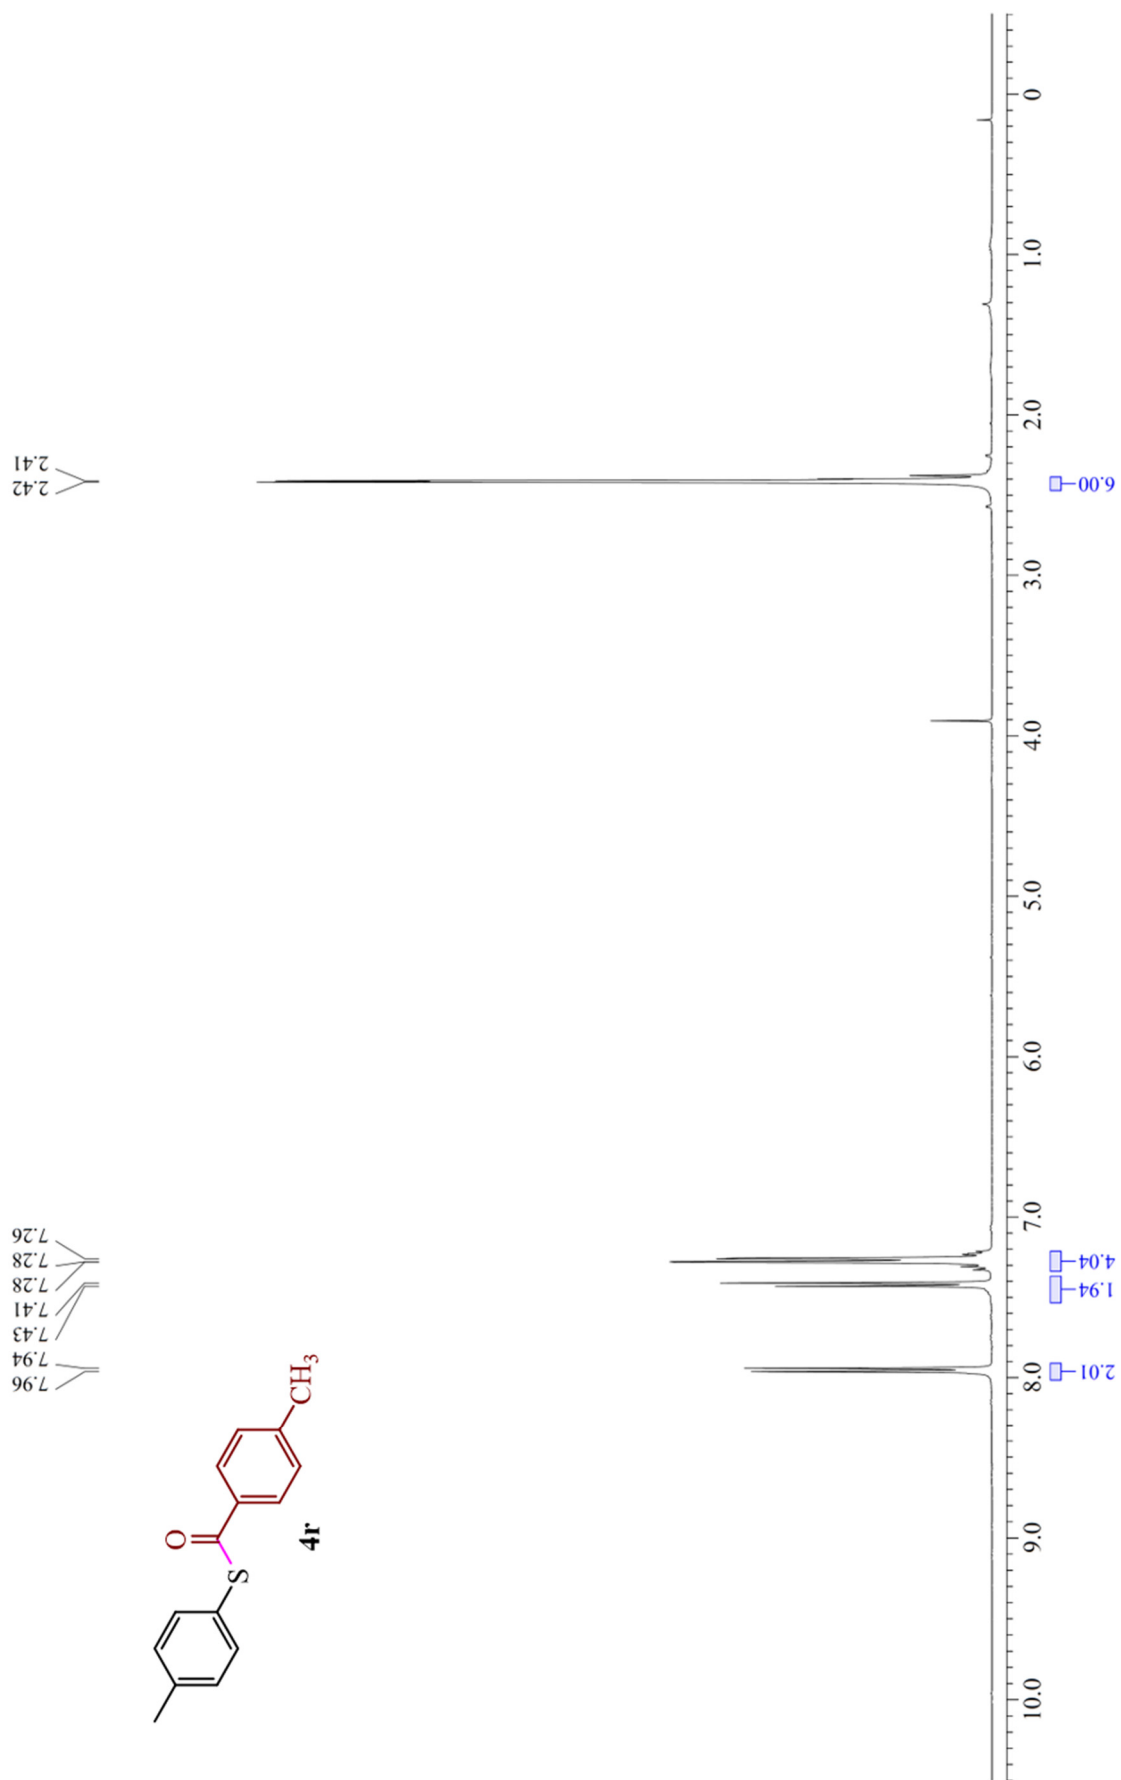

<sup>1</sup>H NMR spectrum of compound **4r** (400 MHz, CDCl<sub>3</sub>)

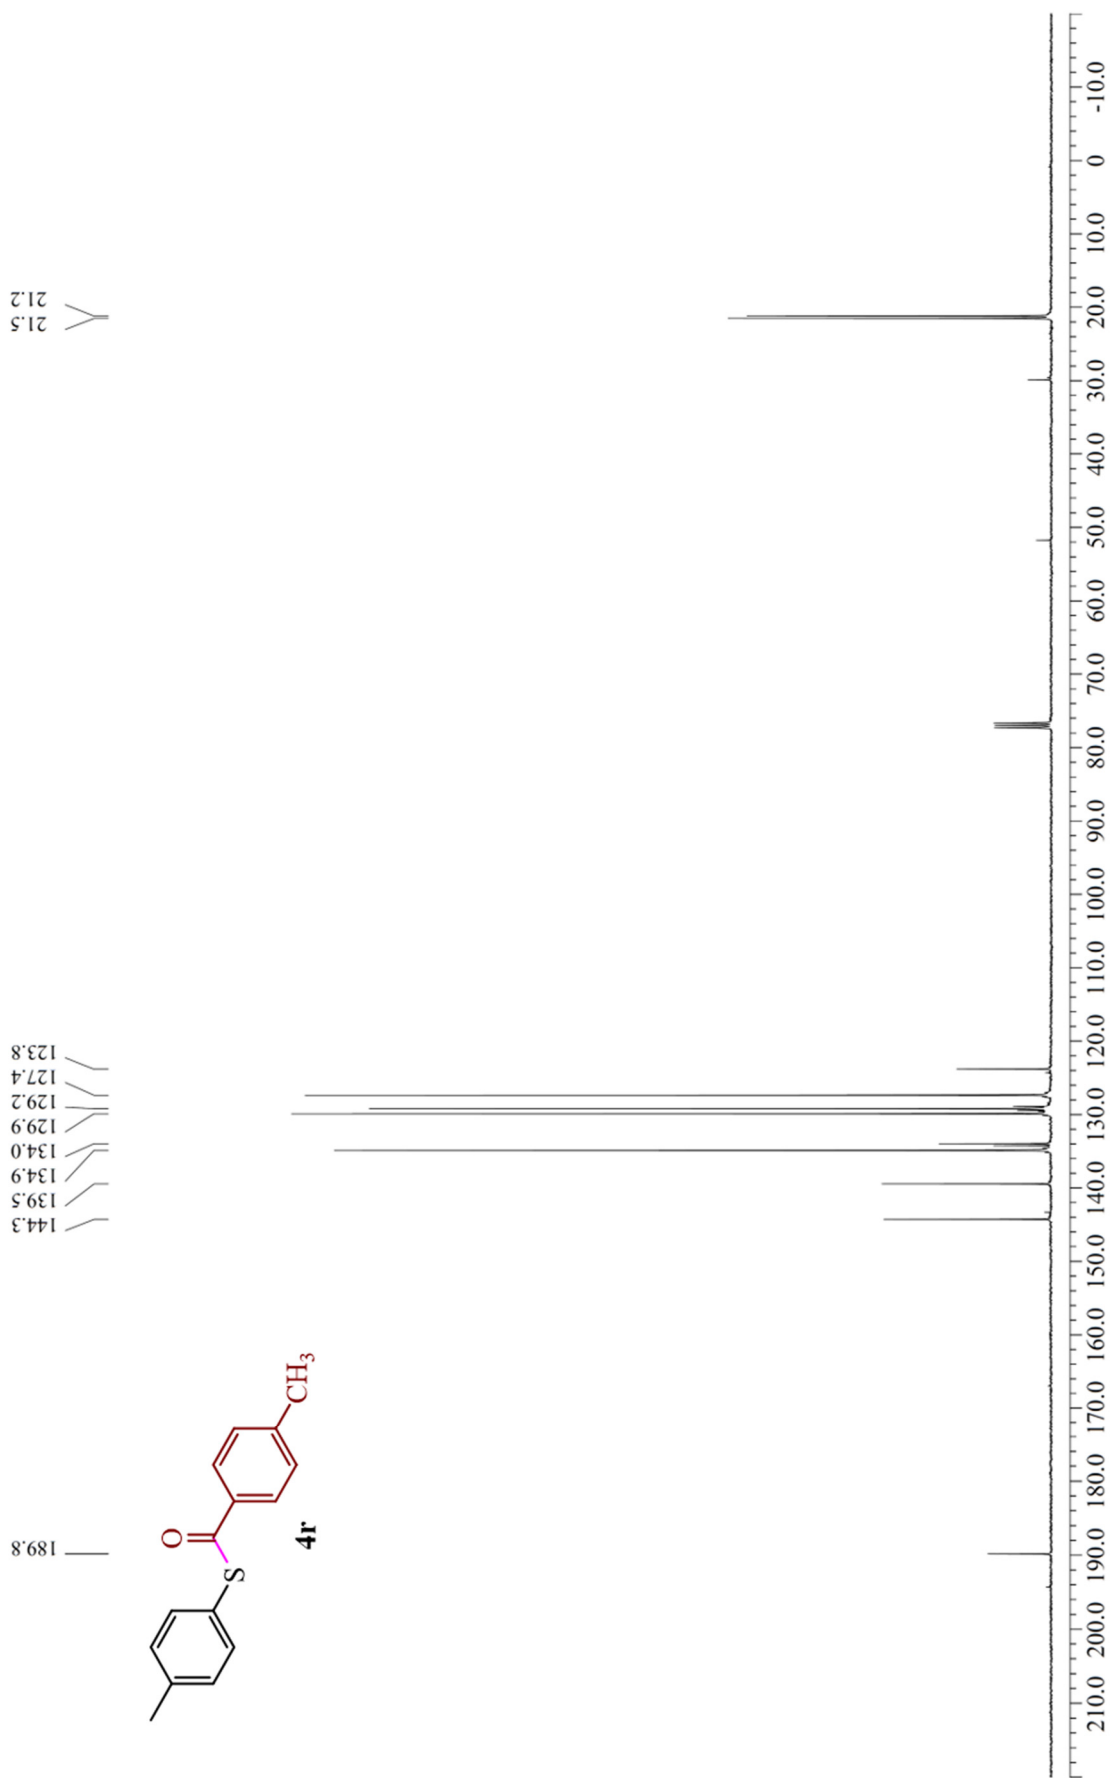

<sup>13</sup>C{H} NMR spectrum of compound **4r** (100 MHz, CDCl<sub>3</sub>)

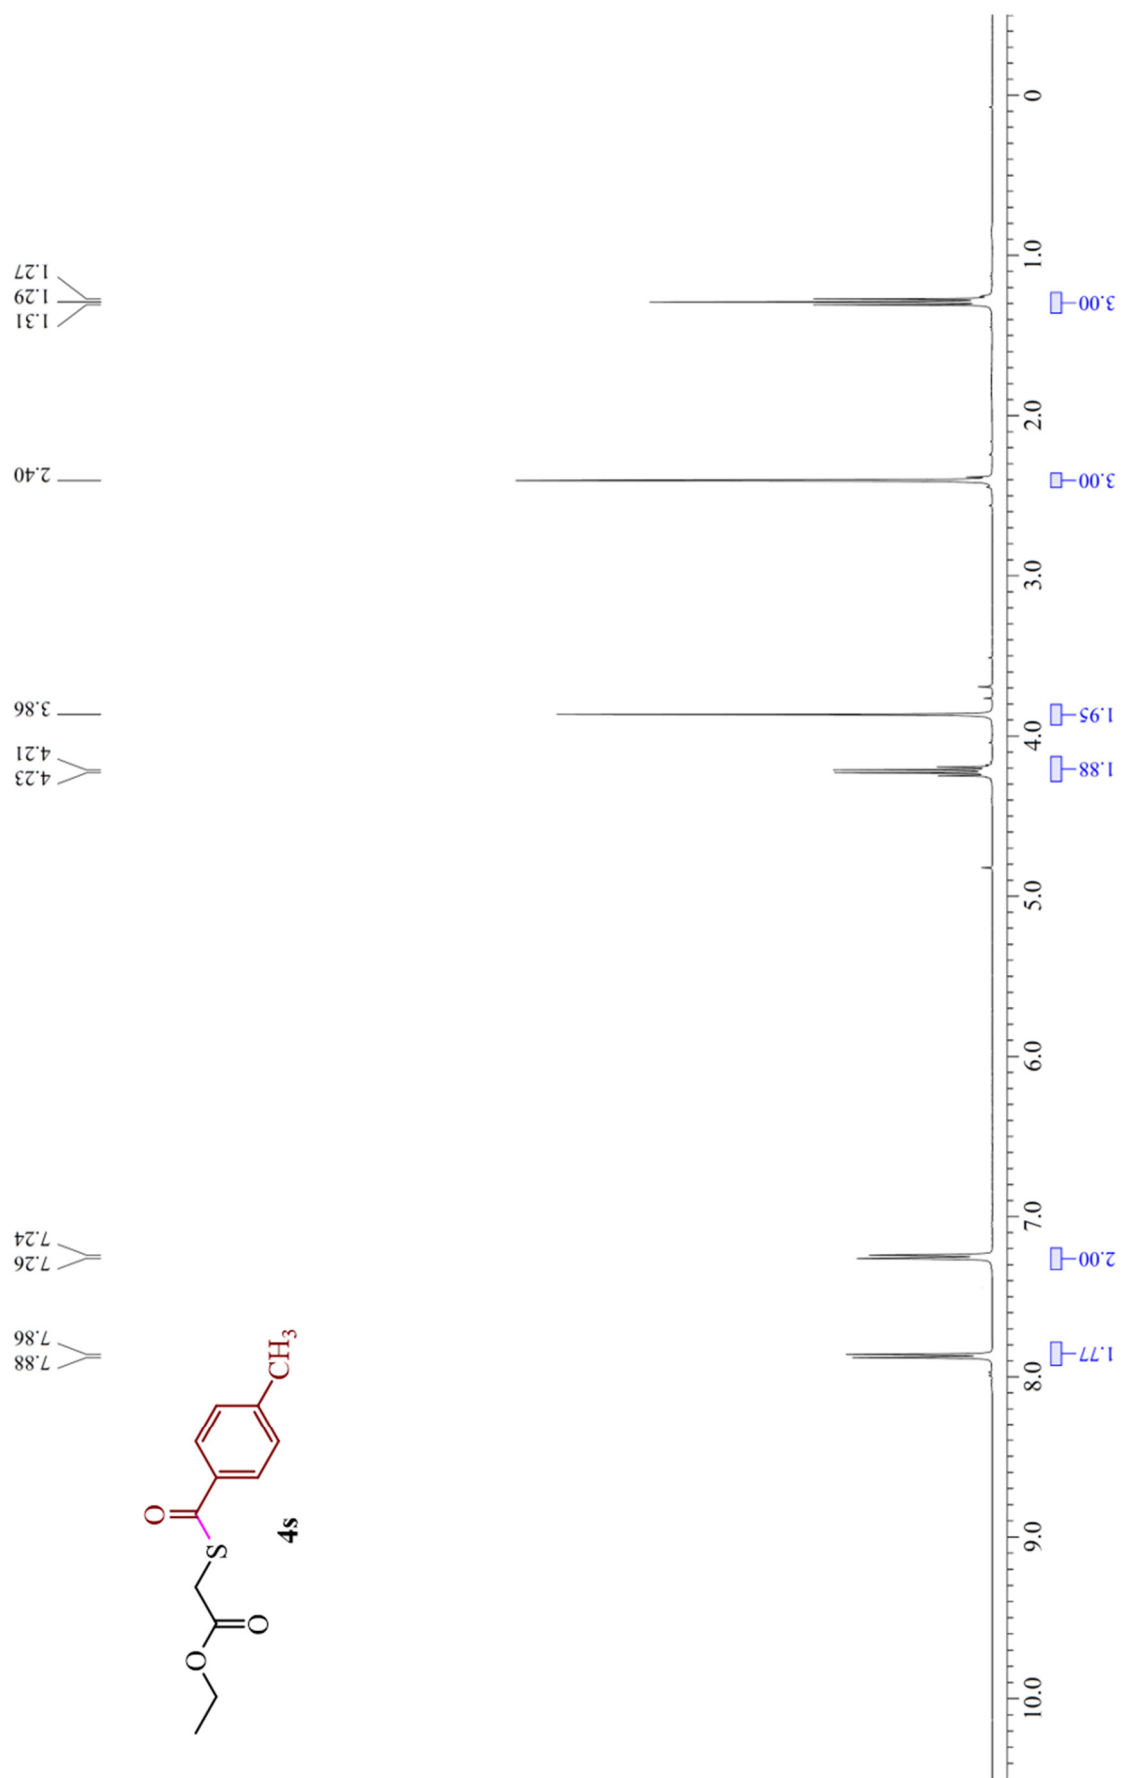

<sup>1</sup>H NMR spectrum of compound **4s** (400 MHz, CDCl<sub>3</sub>)

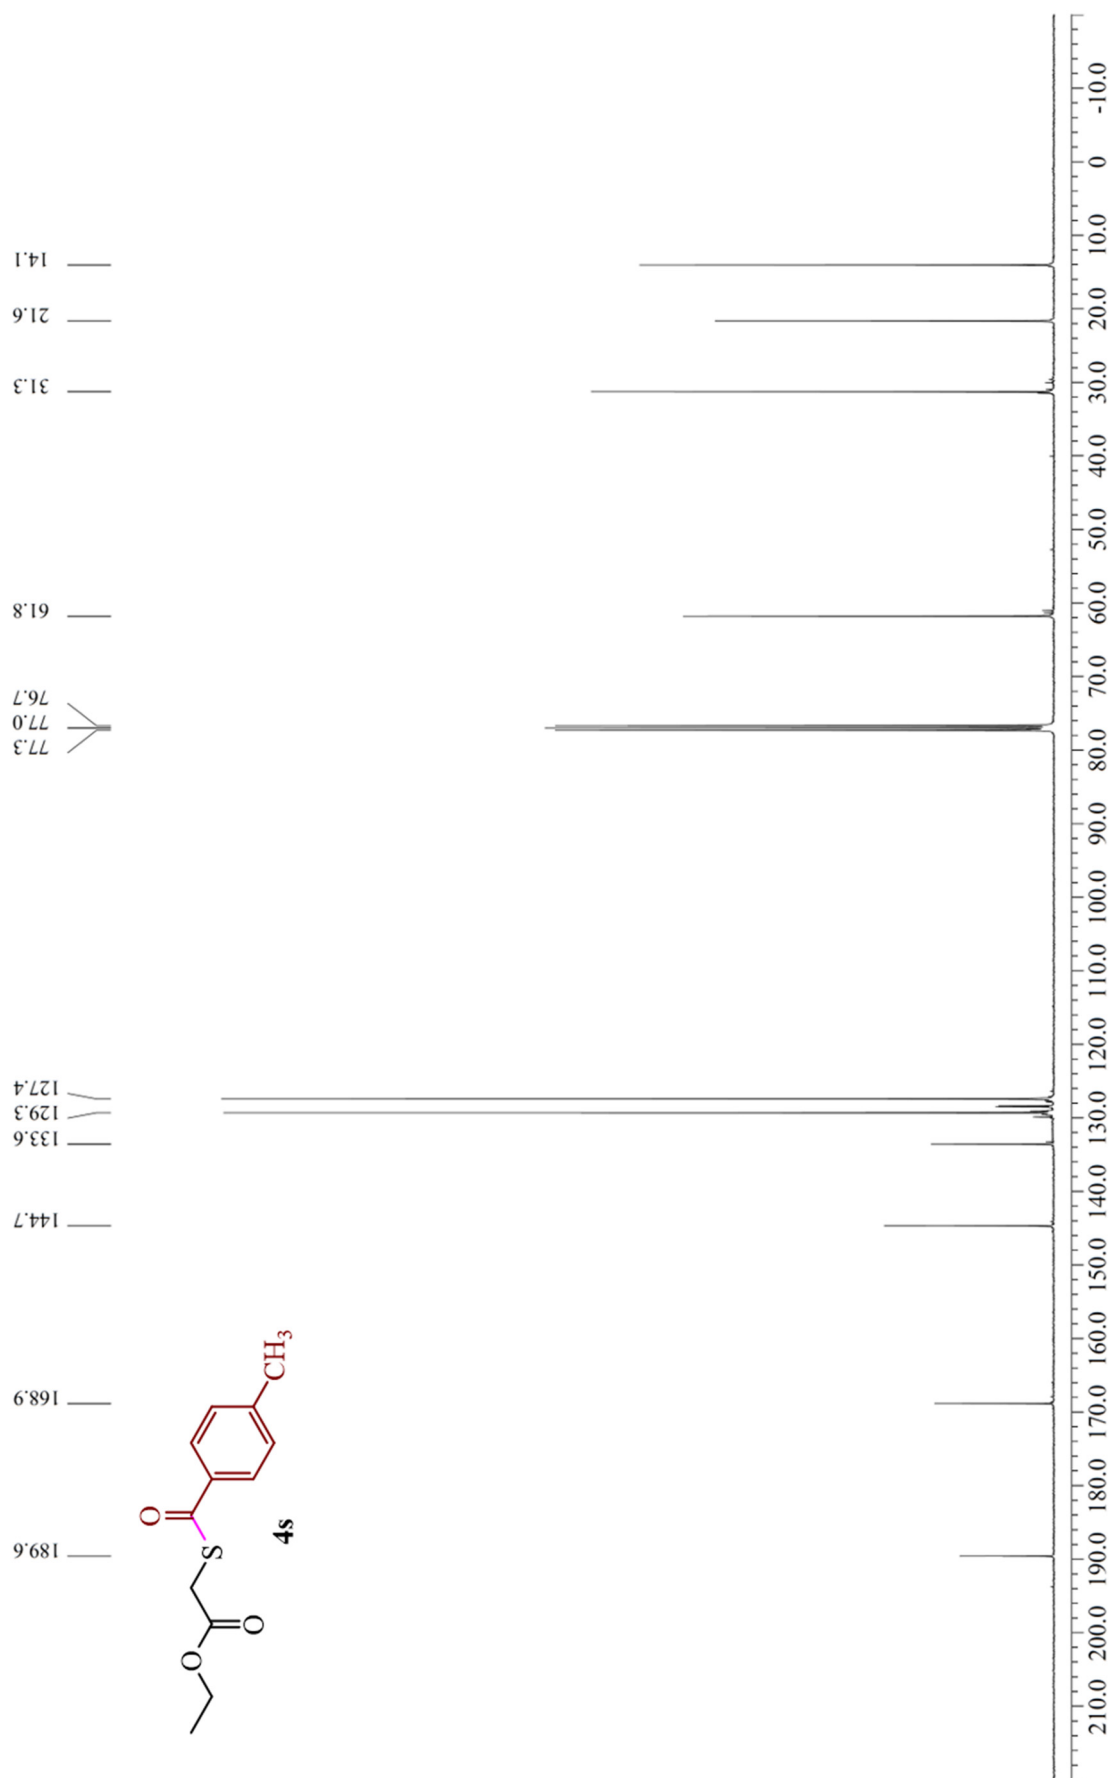

<sup>13</sup>C{H} NMR spectrum of compound **4s** (100 MHz, CDCl<sub>3</sub>)

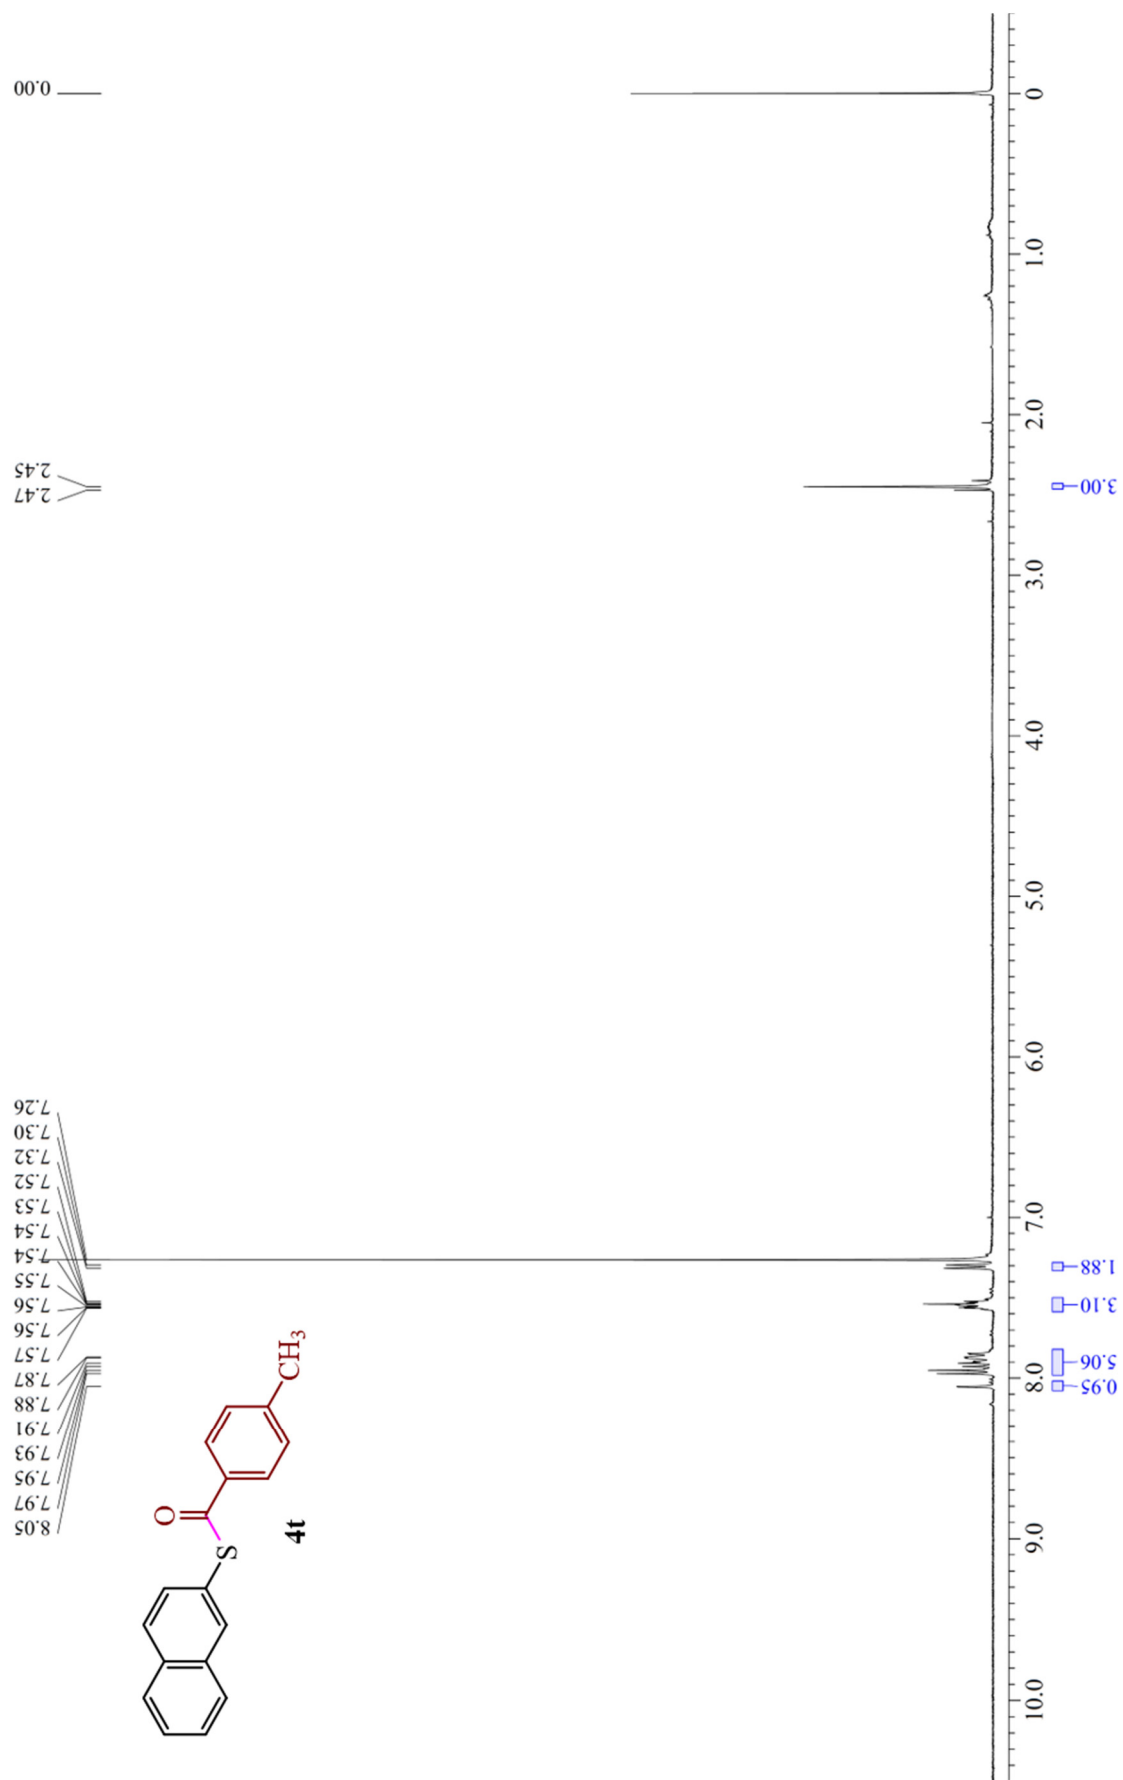

$^1\text{H}$  NMR spectrum of compound **4t** (400 MHz,  $\text{CDCl}_3$ )

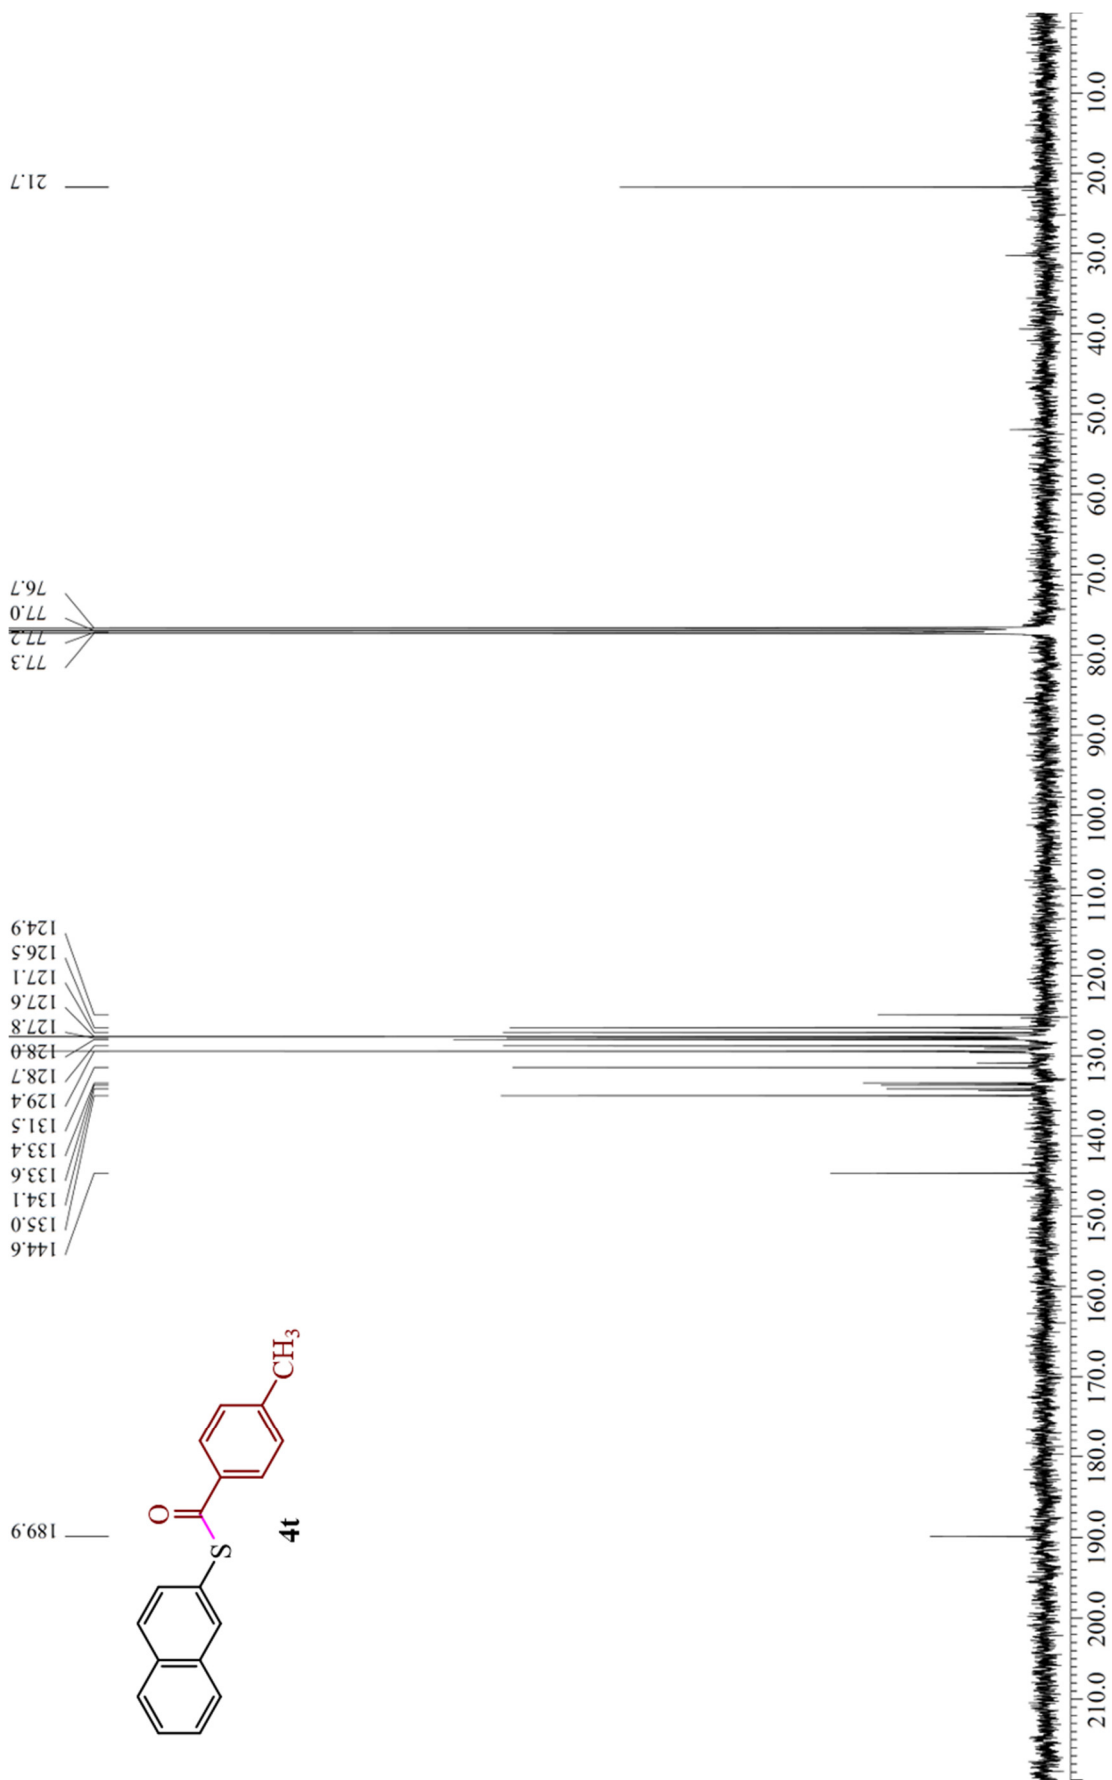

$^{13}\text{C}\{\text{H}\}$  NMR spectrum of compound **4t** (100 MHz,  $\text{CDCl}_3$ )

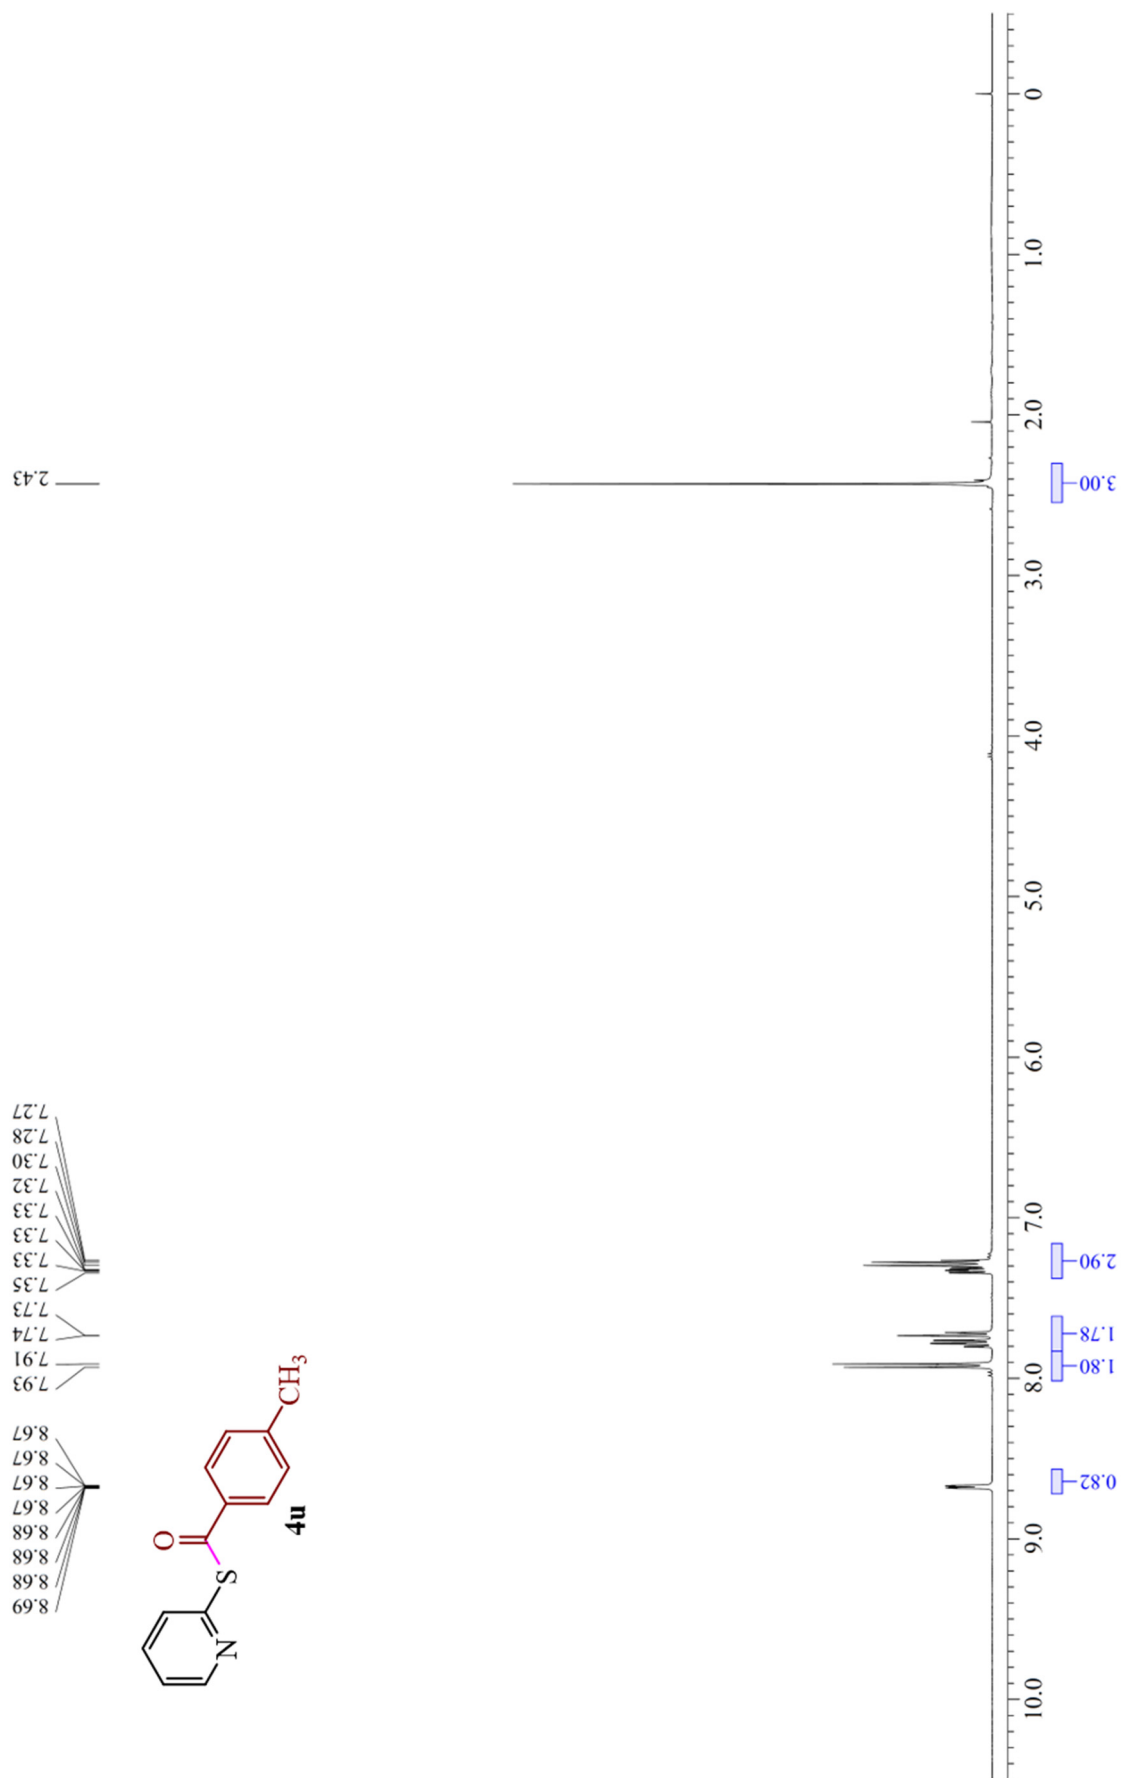

$^1\text{H}$  NMR spectrum of compound **4u** (400 MHz,  $\text{CDCl}_3$ )

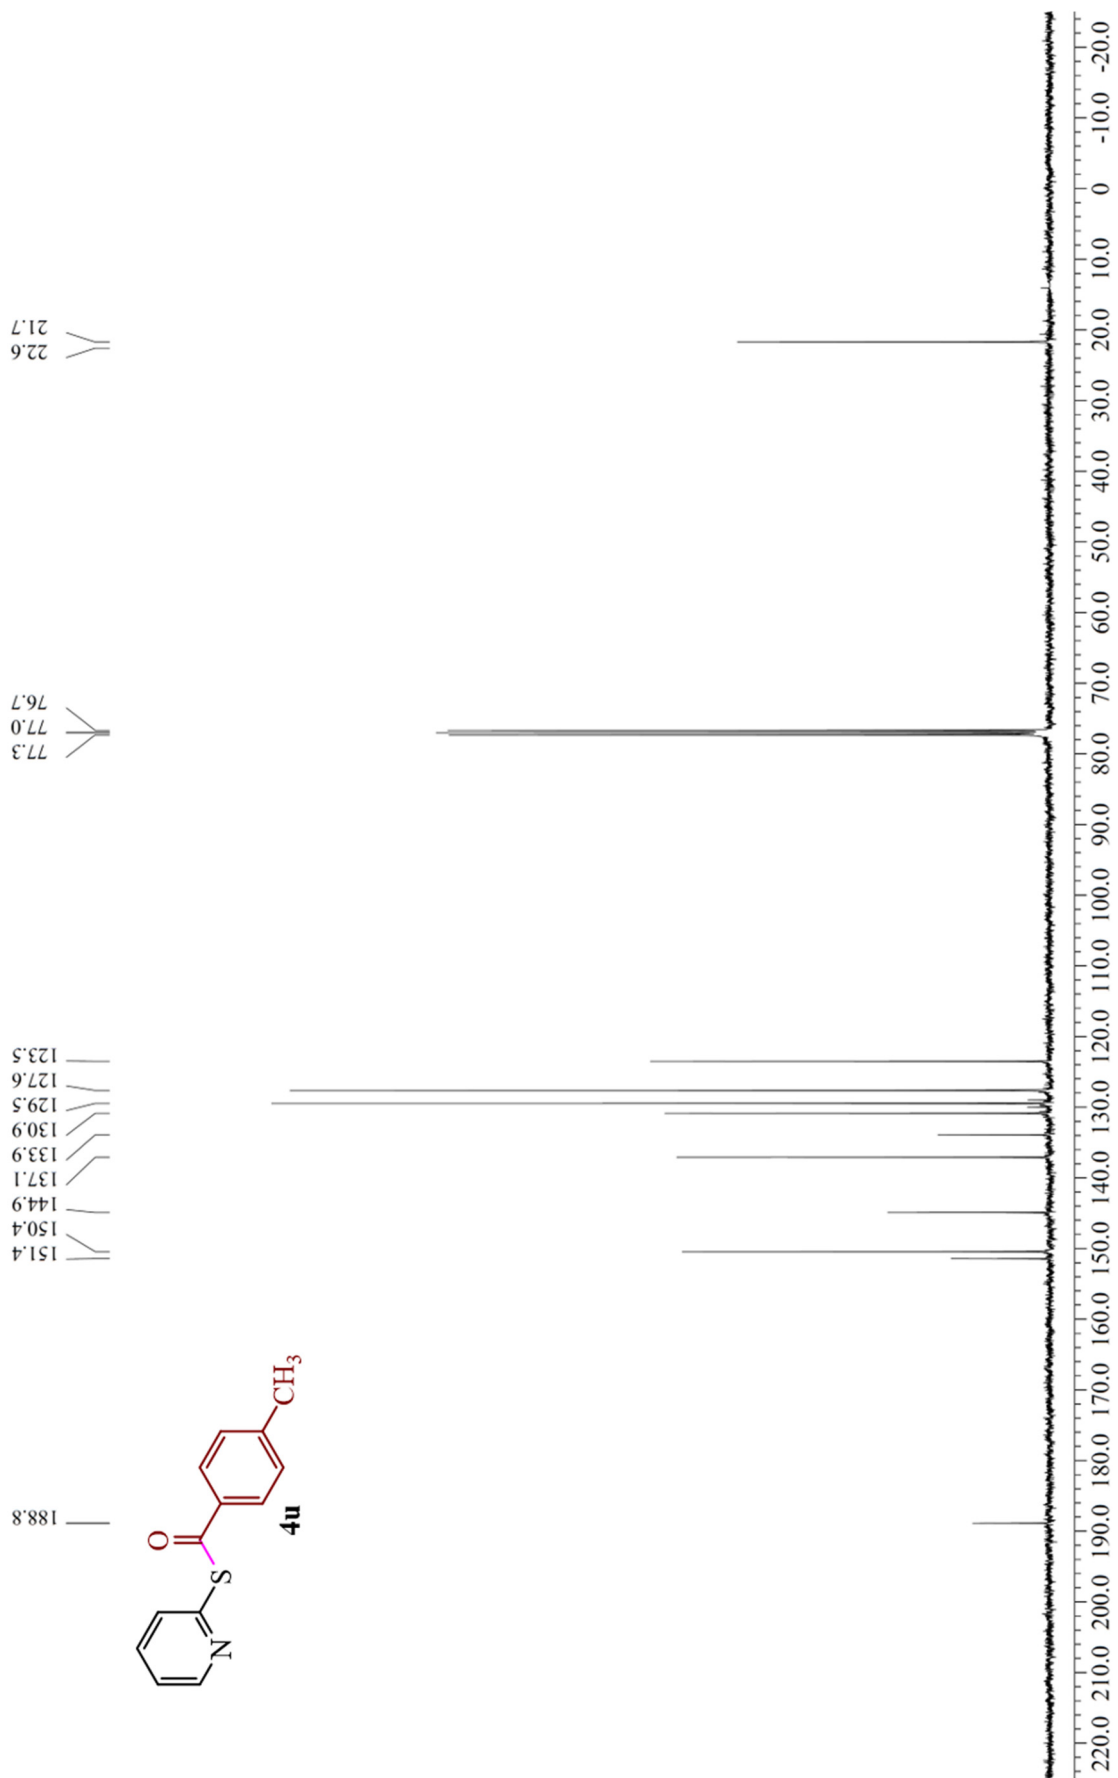

$^{13}\text{C}$  {H} NMR spectrum of compound **4u** (100 MHz,  $\text{CDCl}_3$ )



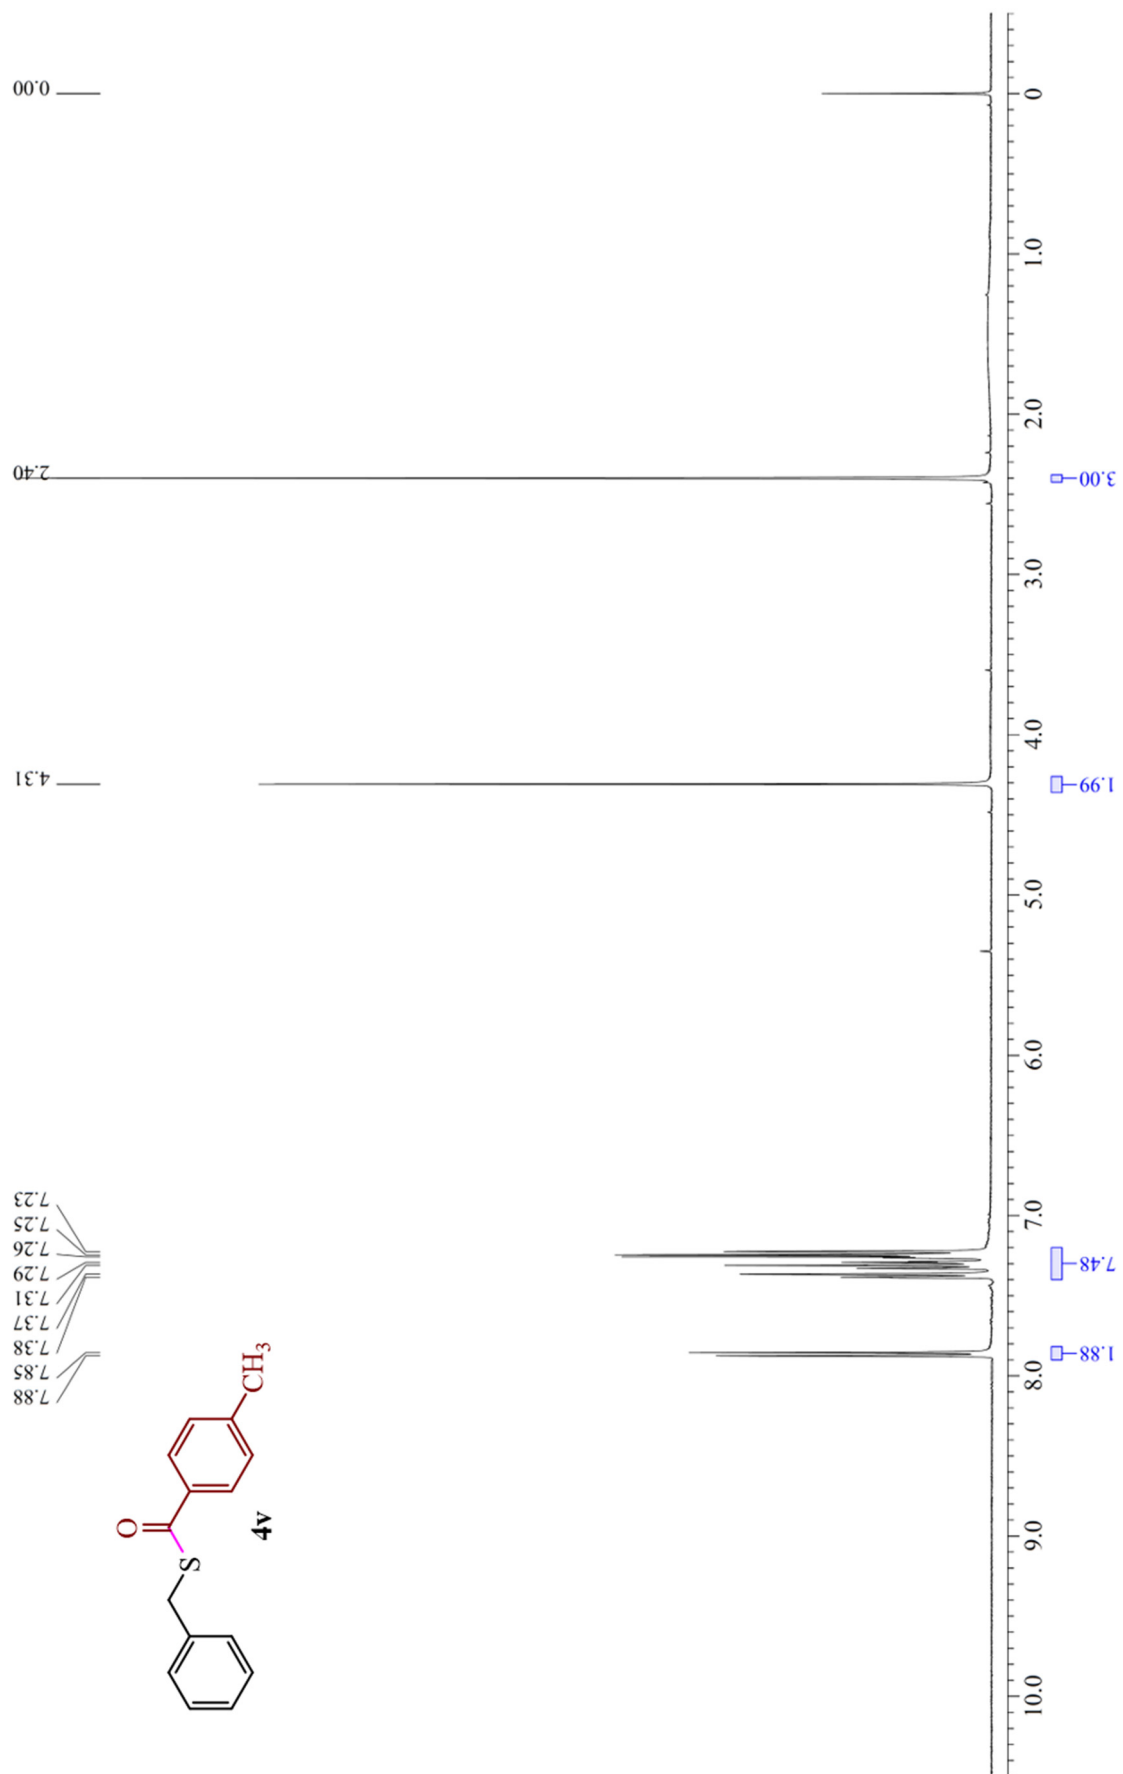

<sup>1</sup>H NMR spectrum of compound **4v** (400 MHz, CDCl<sub>3</sub>)

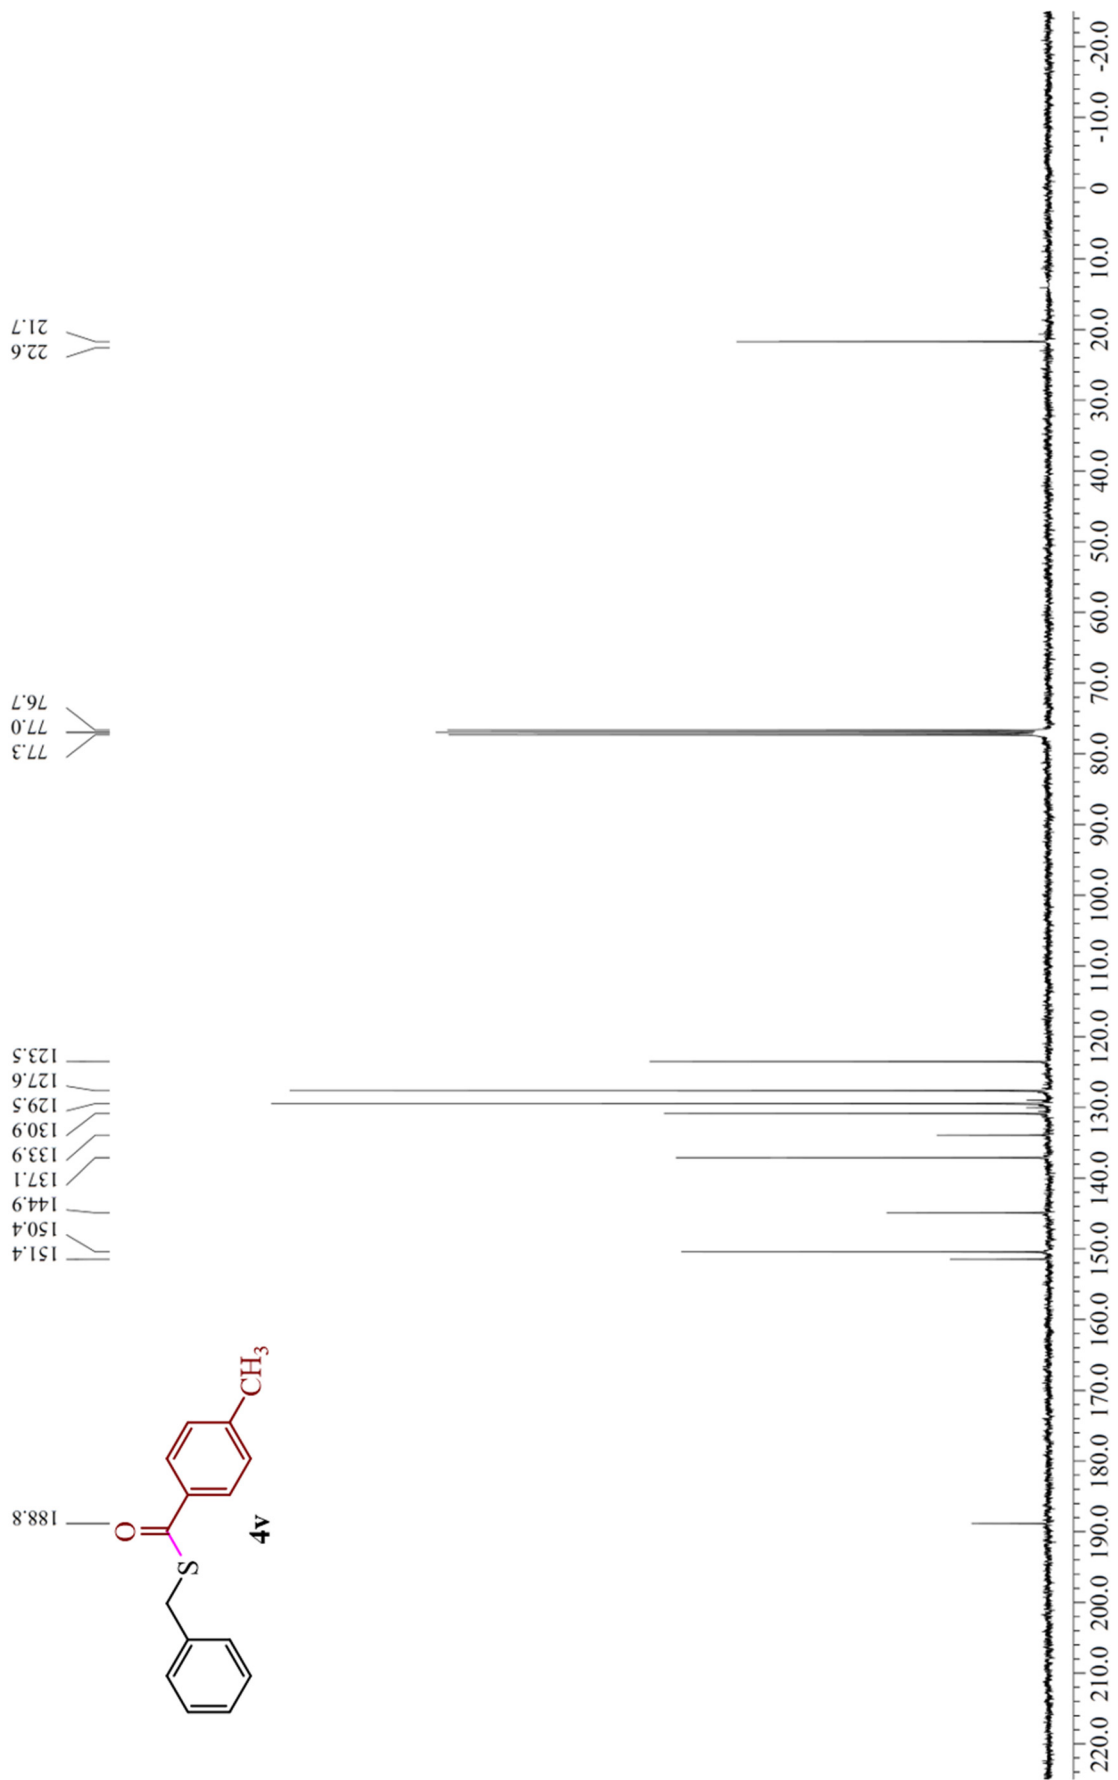

$^{13}\text{C}\{\text{H}\}$  NMR spectrum of compound **4v** (100 MHz,  $\text{CDCl}_3$ )

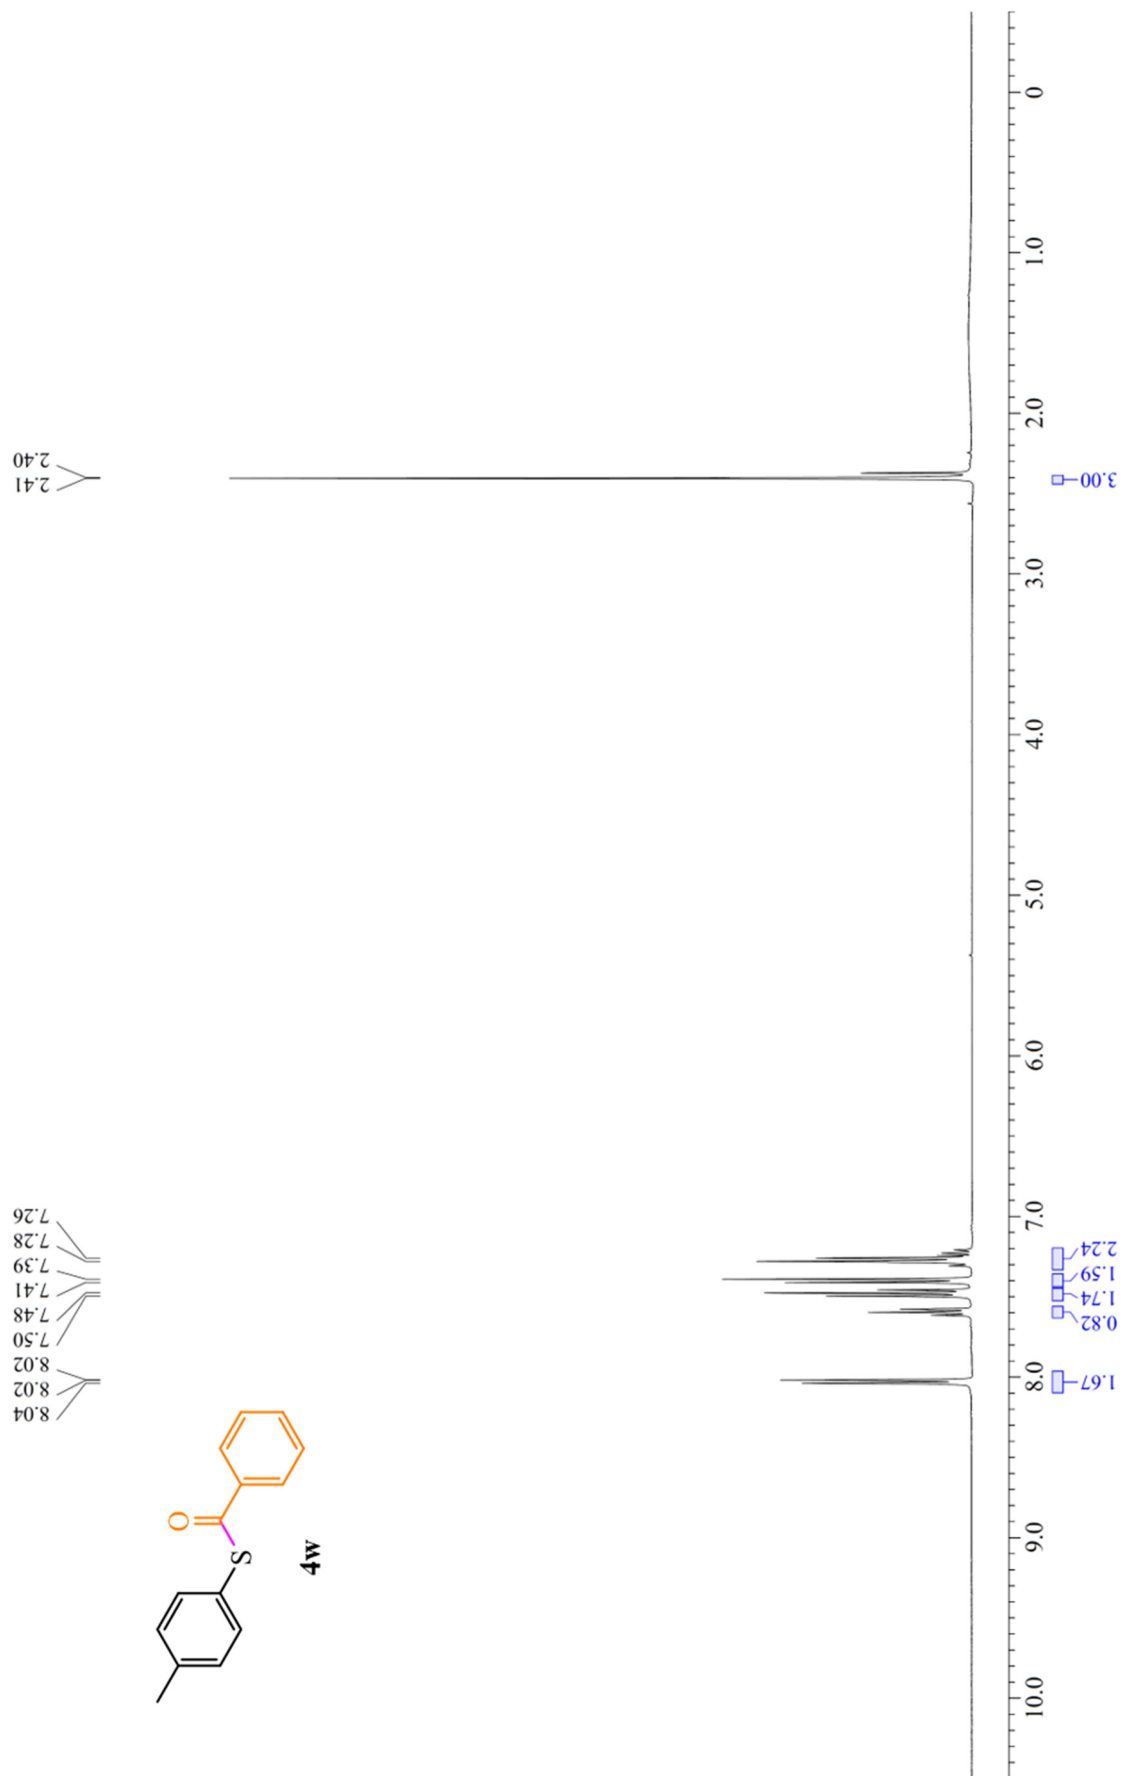

$^1\text{H}$  NMR spectrum of compound **4w** (400 MHz,  $\text{CDCl}_3$ )

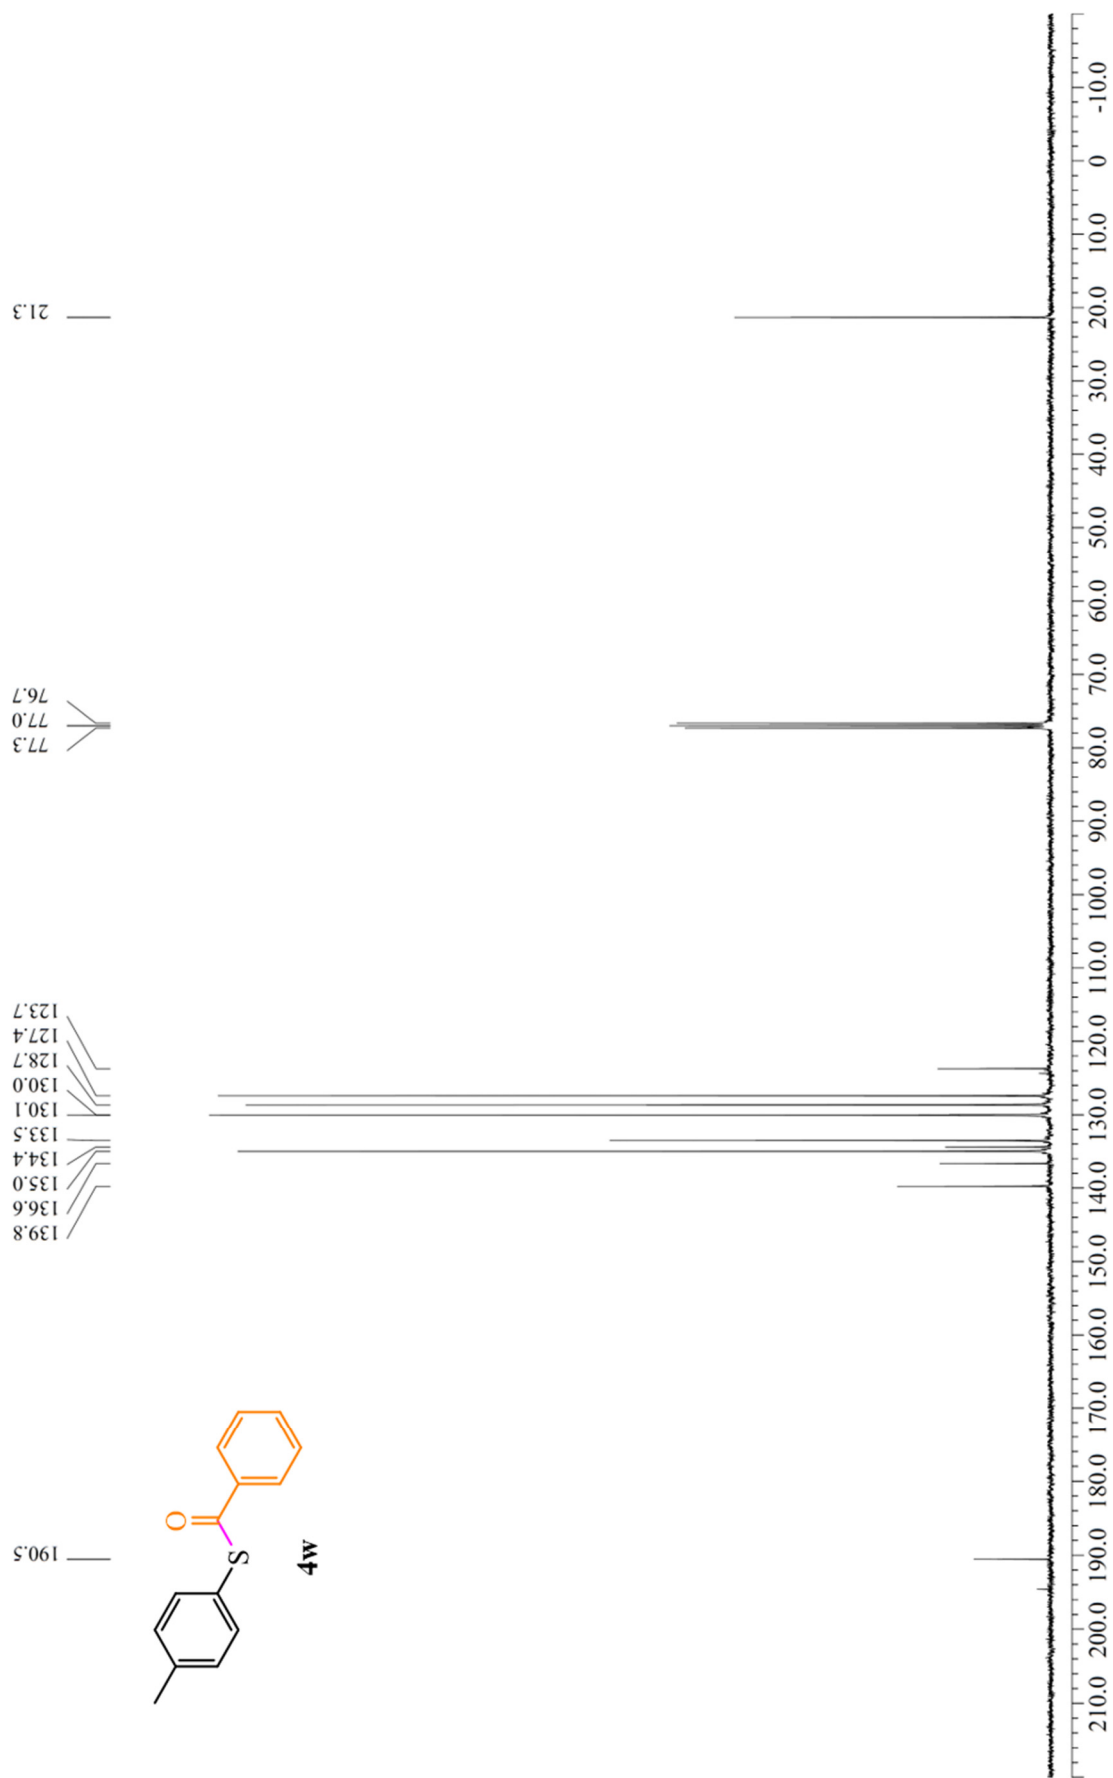

$^{13}\text{C}\{^1\text{H}\}$  NMR spectrum of compound **4w** (100 MHz,  $\text{CDCl}_3$ )

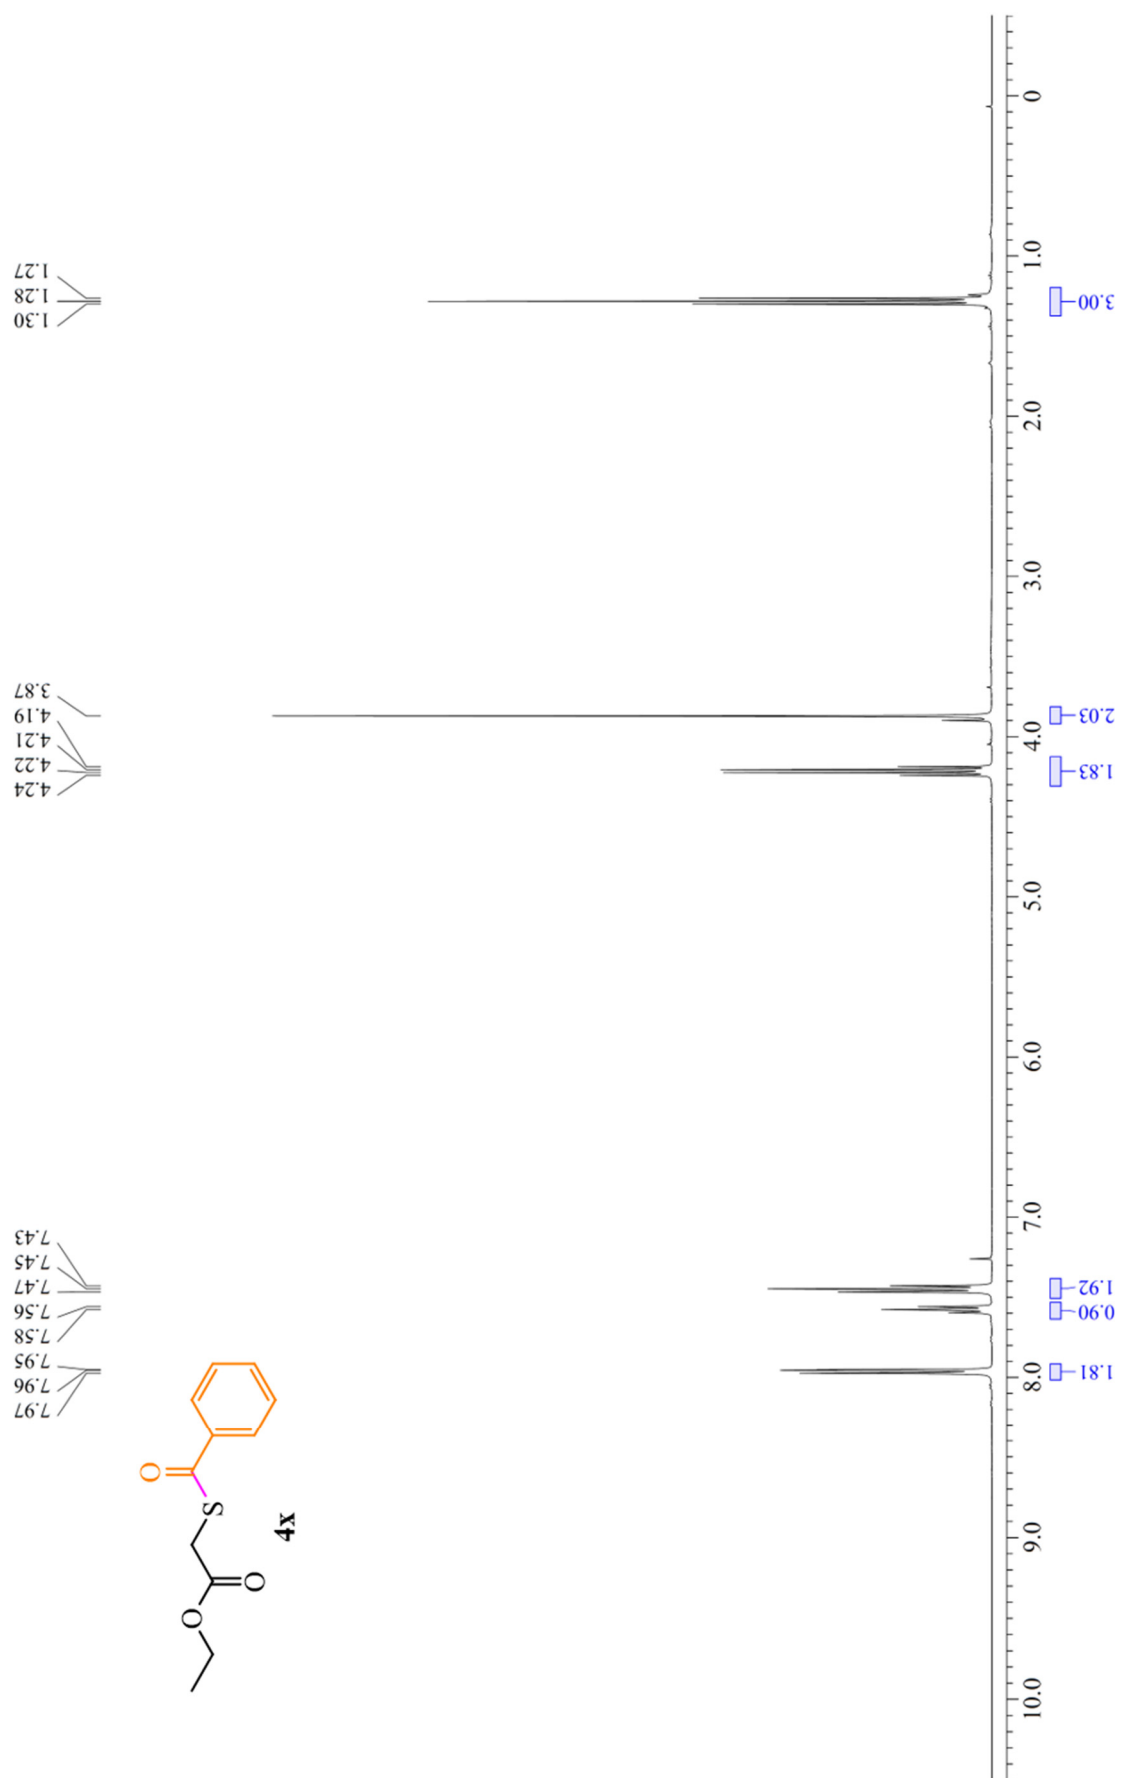

<sup>1</sup>H NMR spectrum of compound **4x** (400 MHz, CDCl<sub>3</sub>)

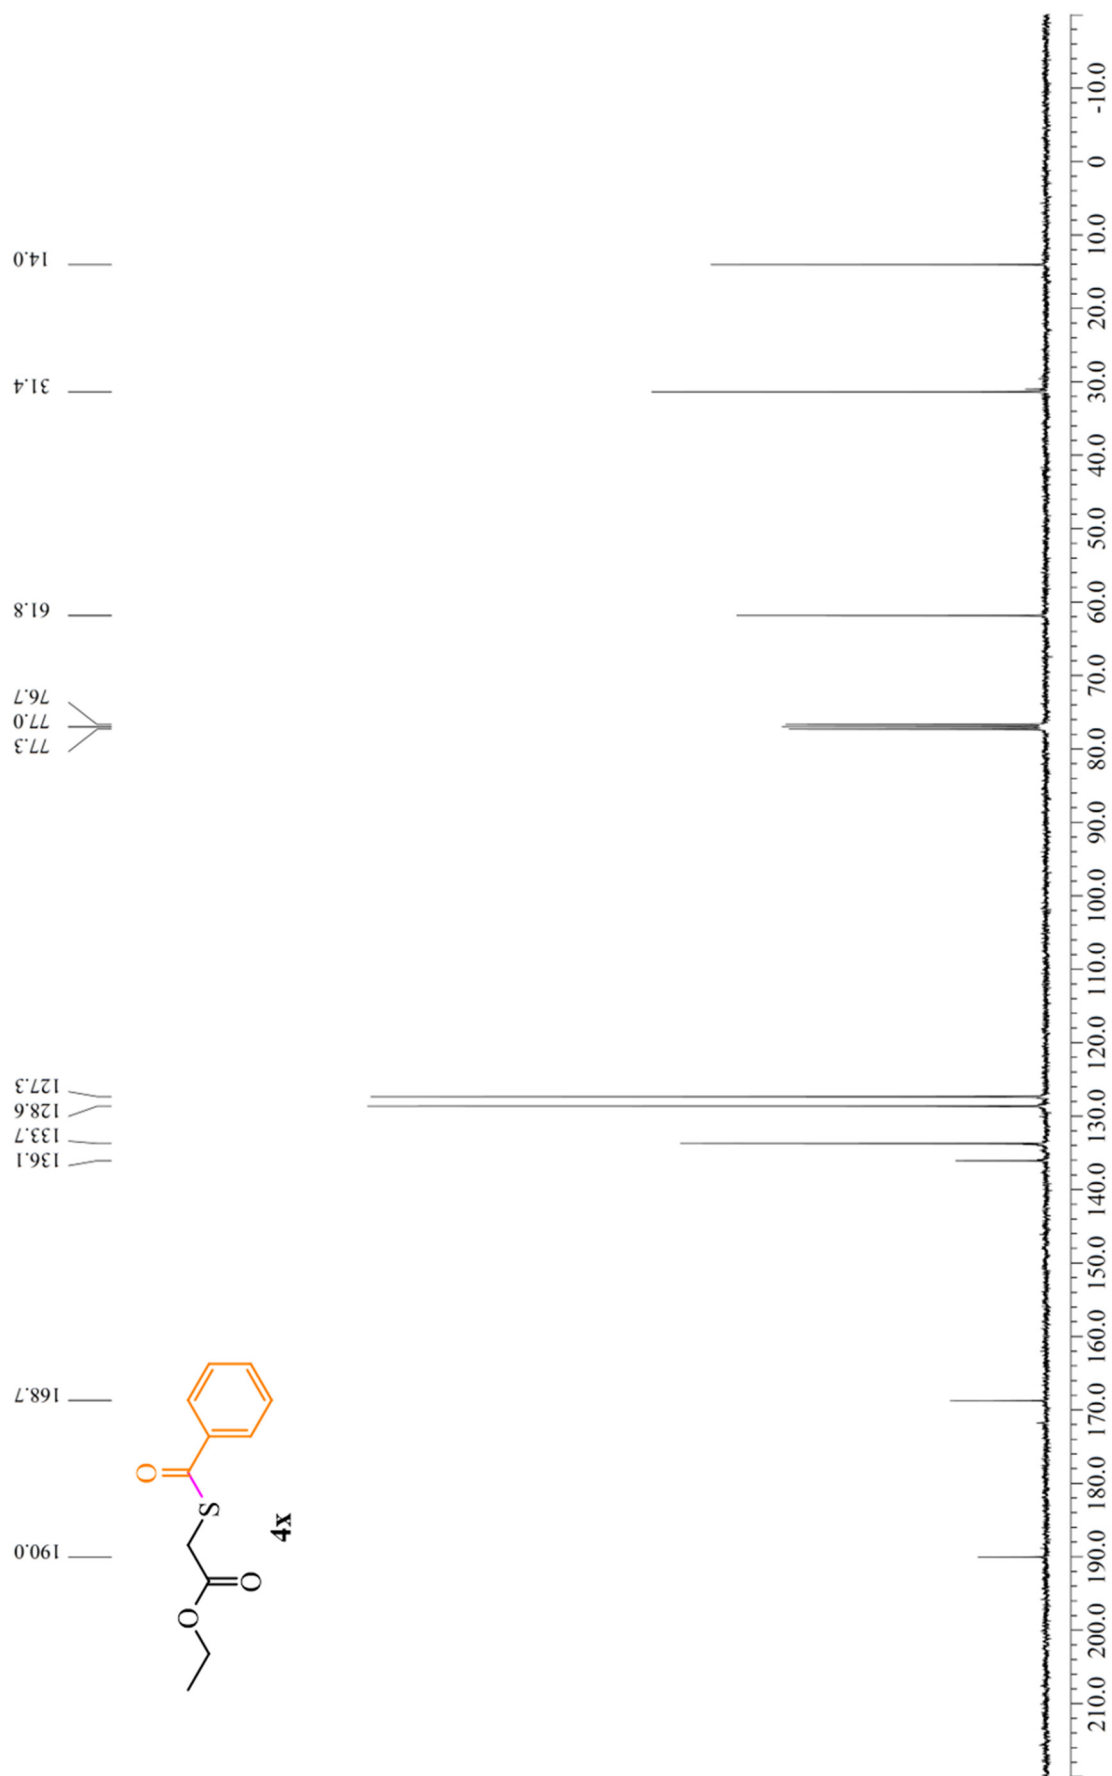

$^{13}\text{C}\{\text{H}\}$  NMR spectrum of compound **4x** (100 MHz,  $\text{CDCl}_3$ )

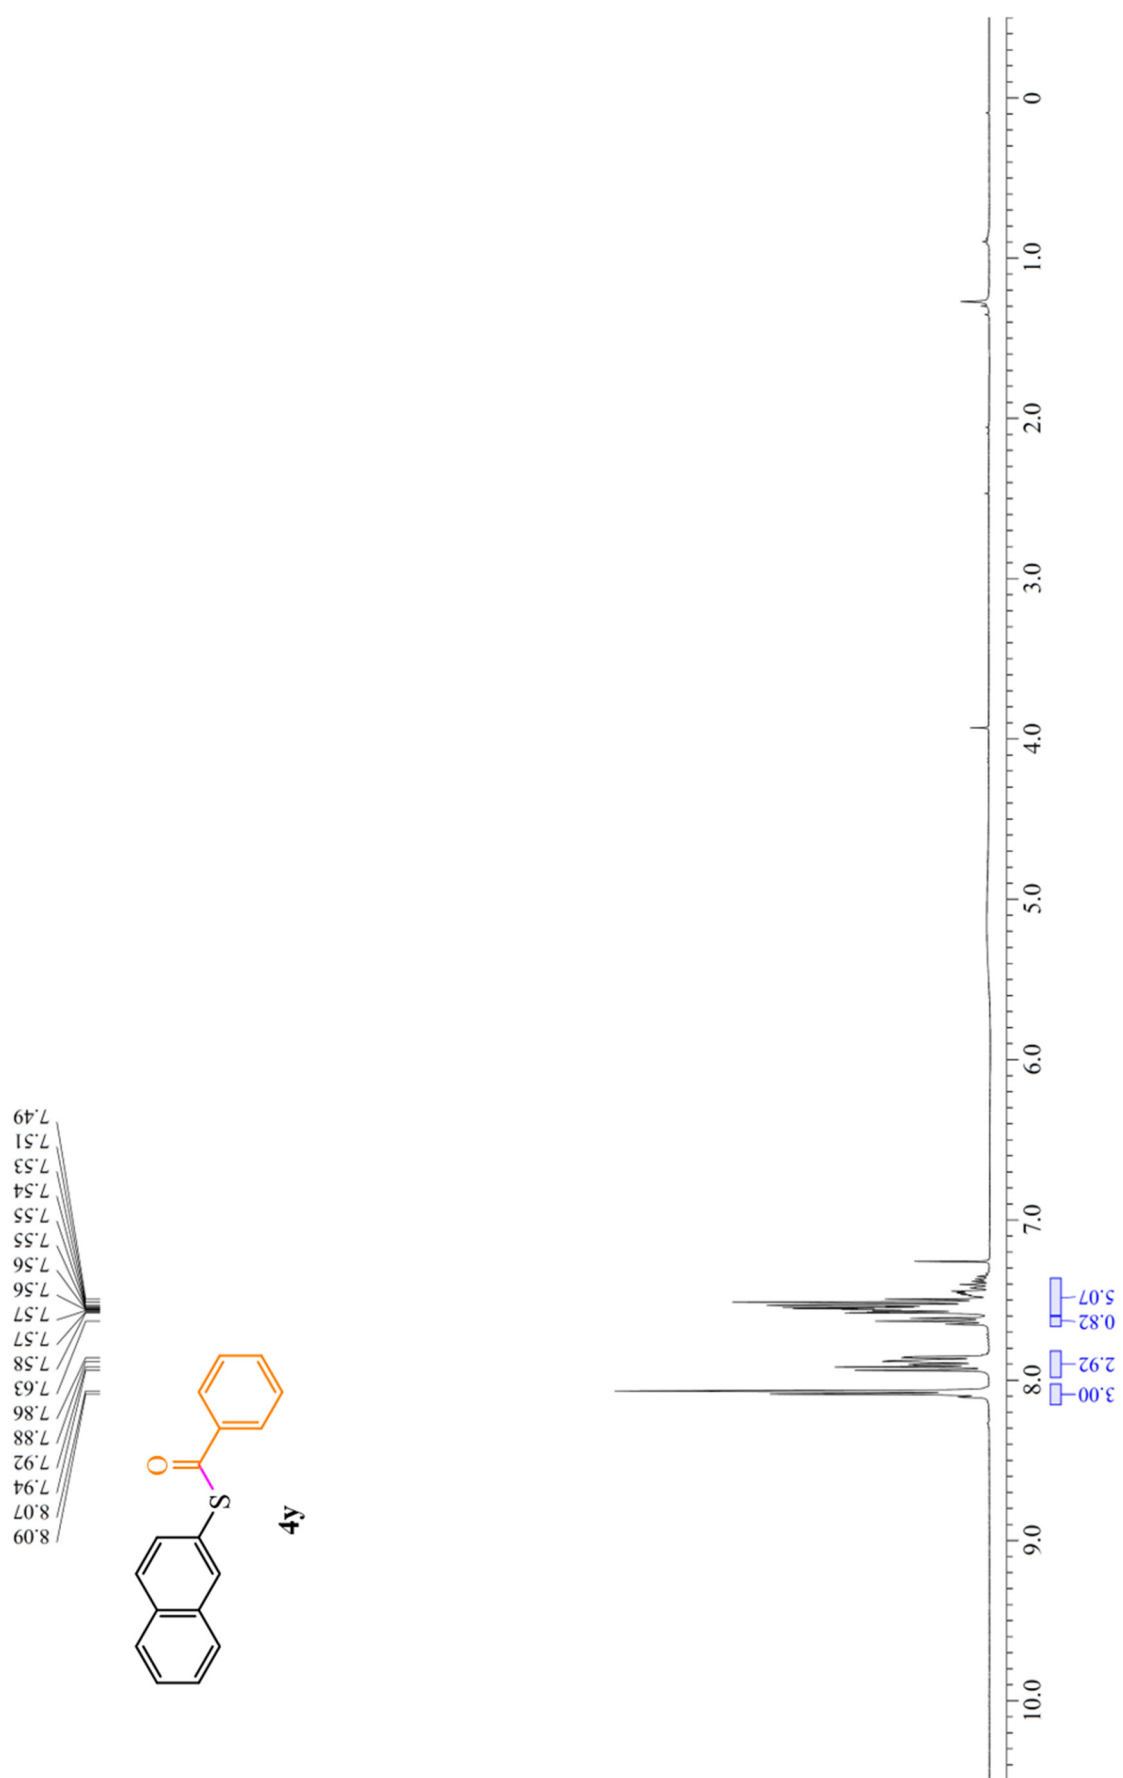

$^1\text{H}$  NMR spectrum of compound **4y** (400 MHz,  $\text{CDCl}_3$ )

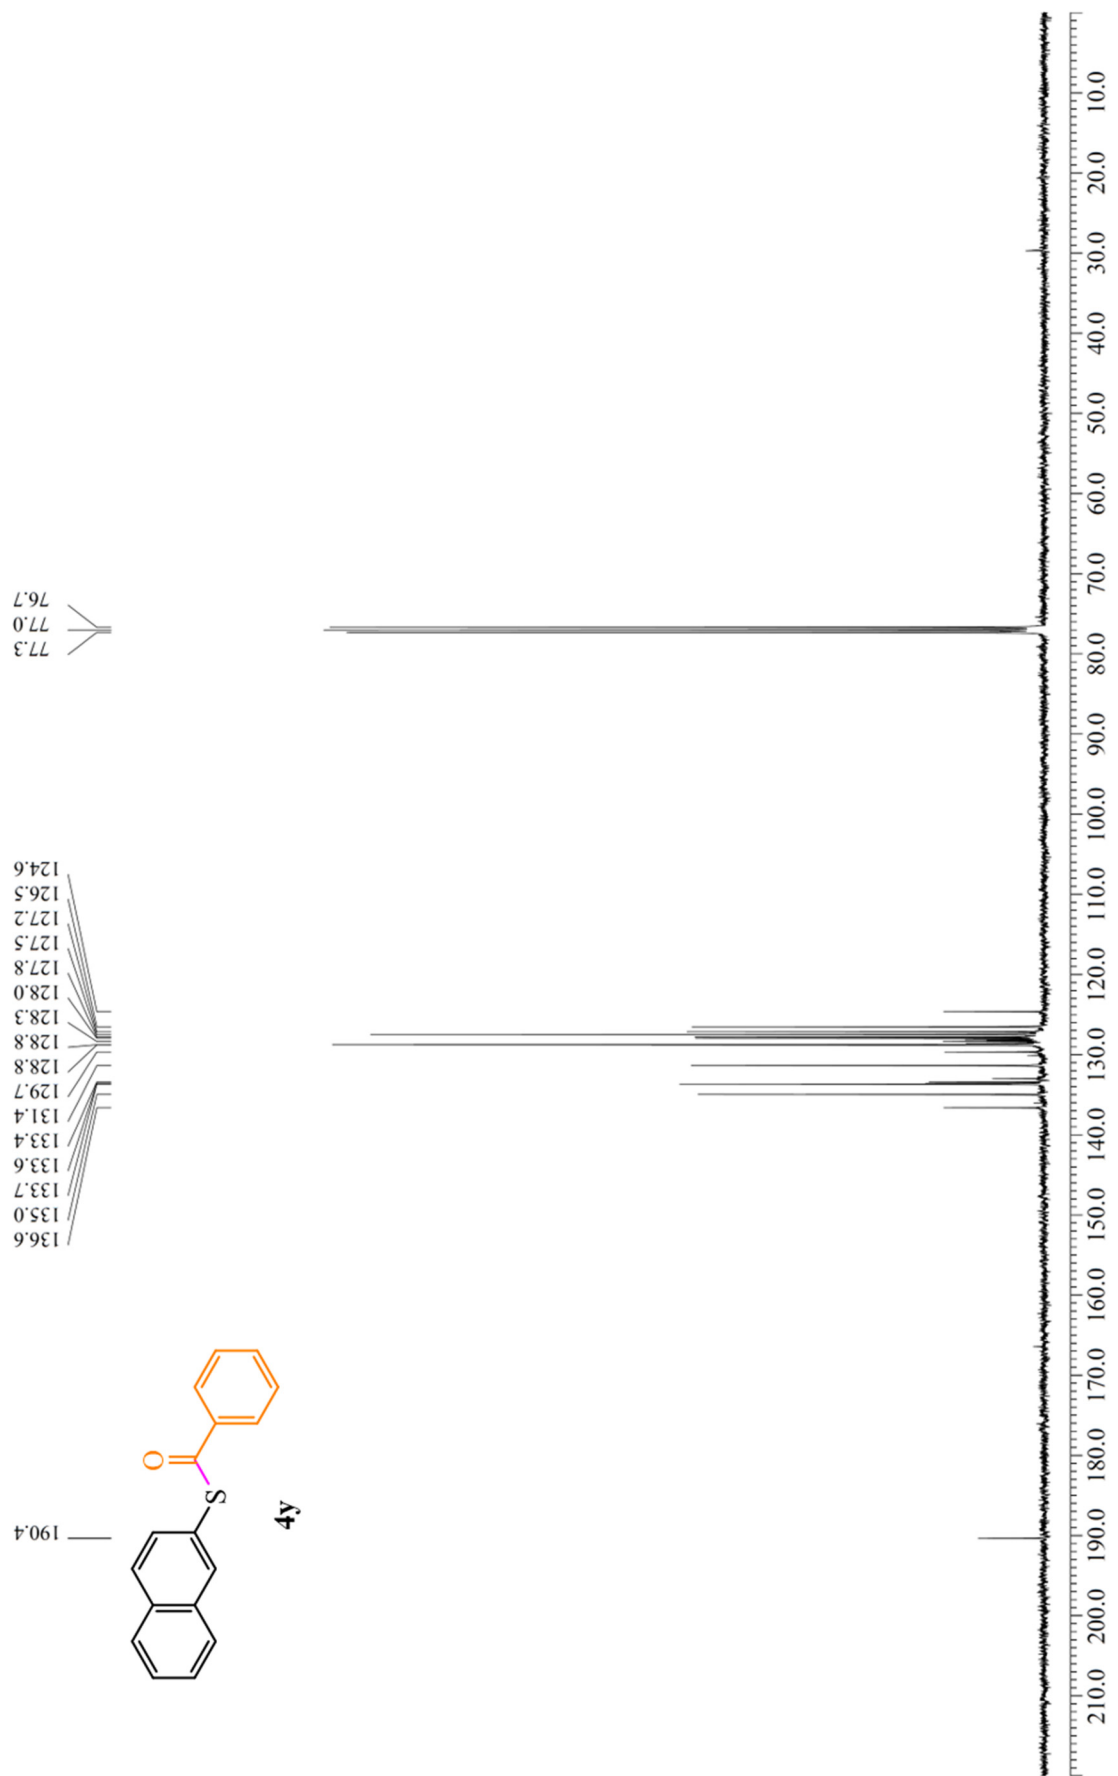

<sup>13</sup>C{H} NMR spectrum of compound **4y** (100 MHz, CDCl<sub>3</sub>)



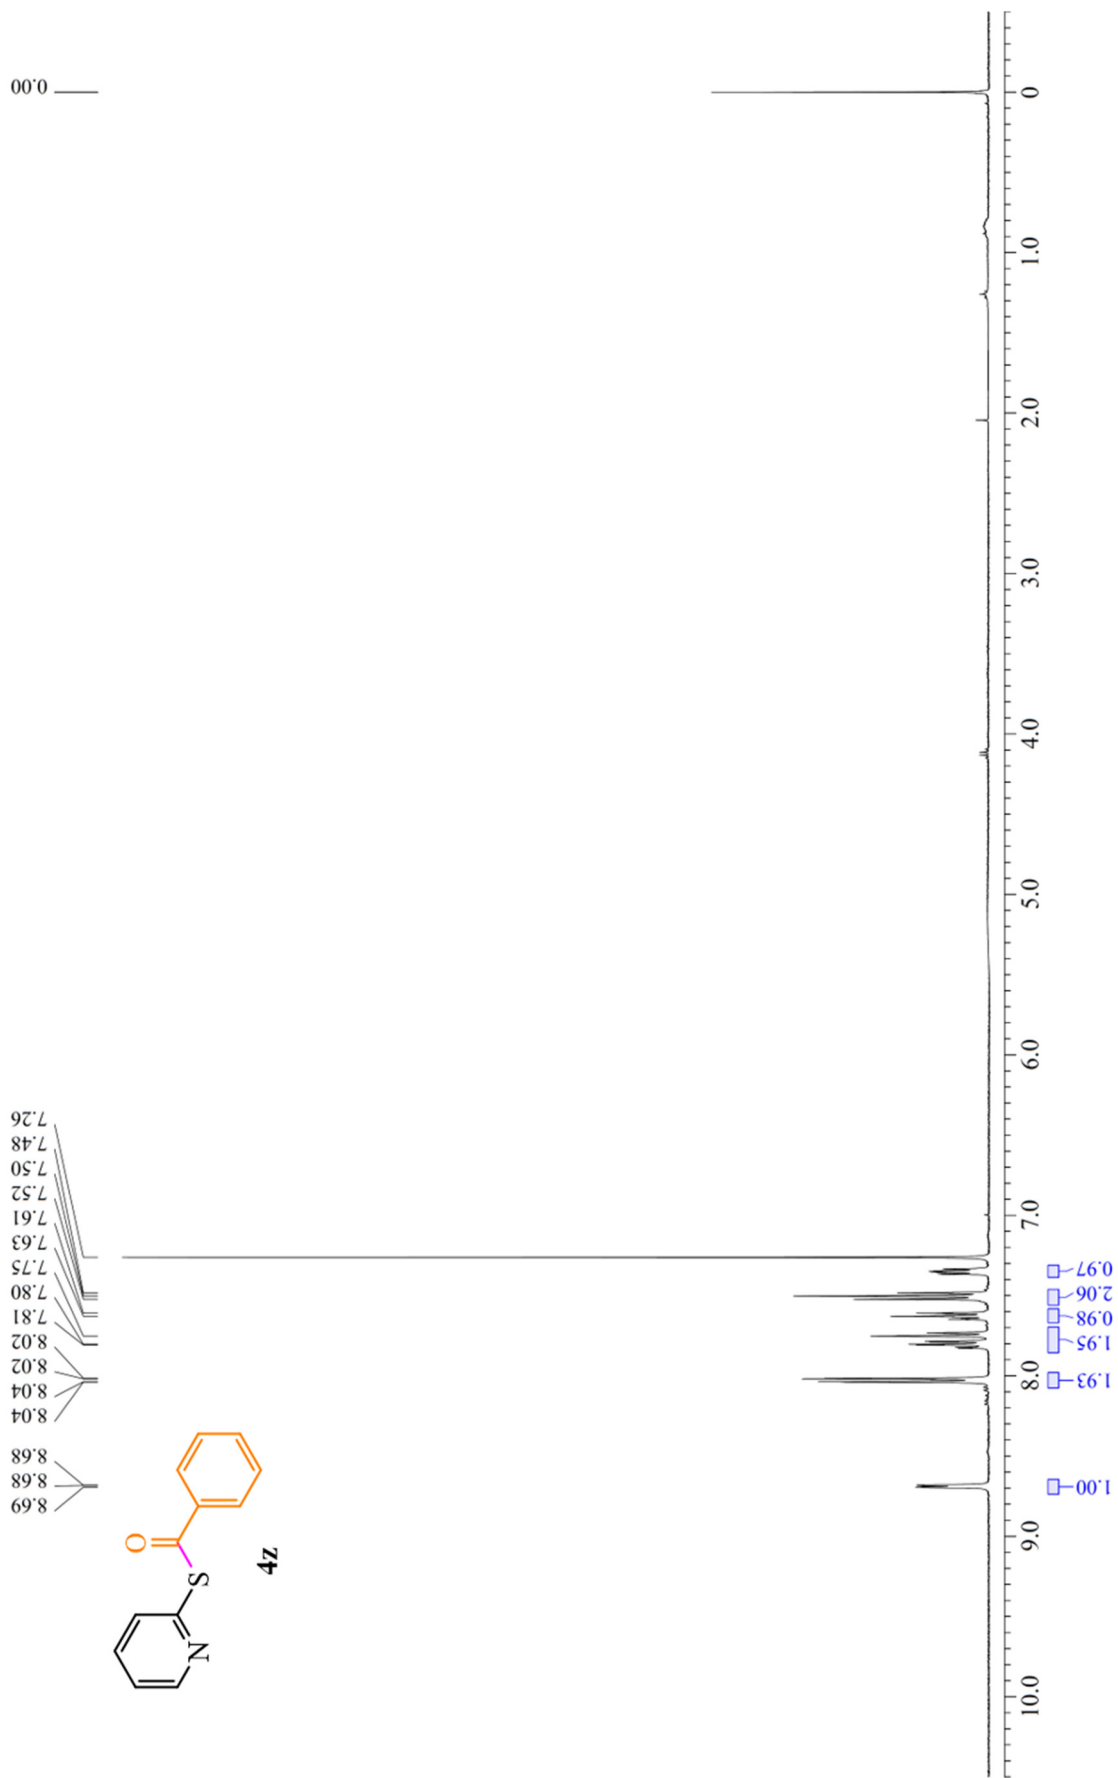

<sup>1</sup>H NMR spectrum of compound **4z** (400 MHz, CDCl<sub>3</sub>)

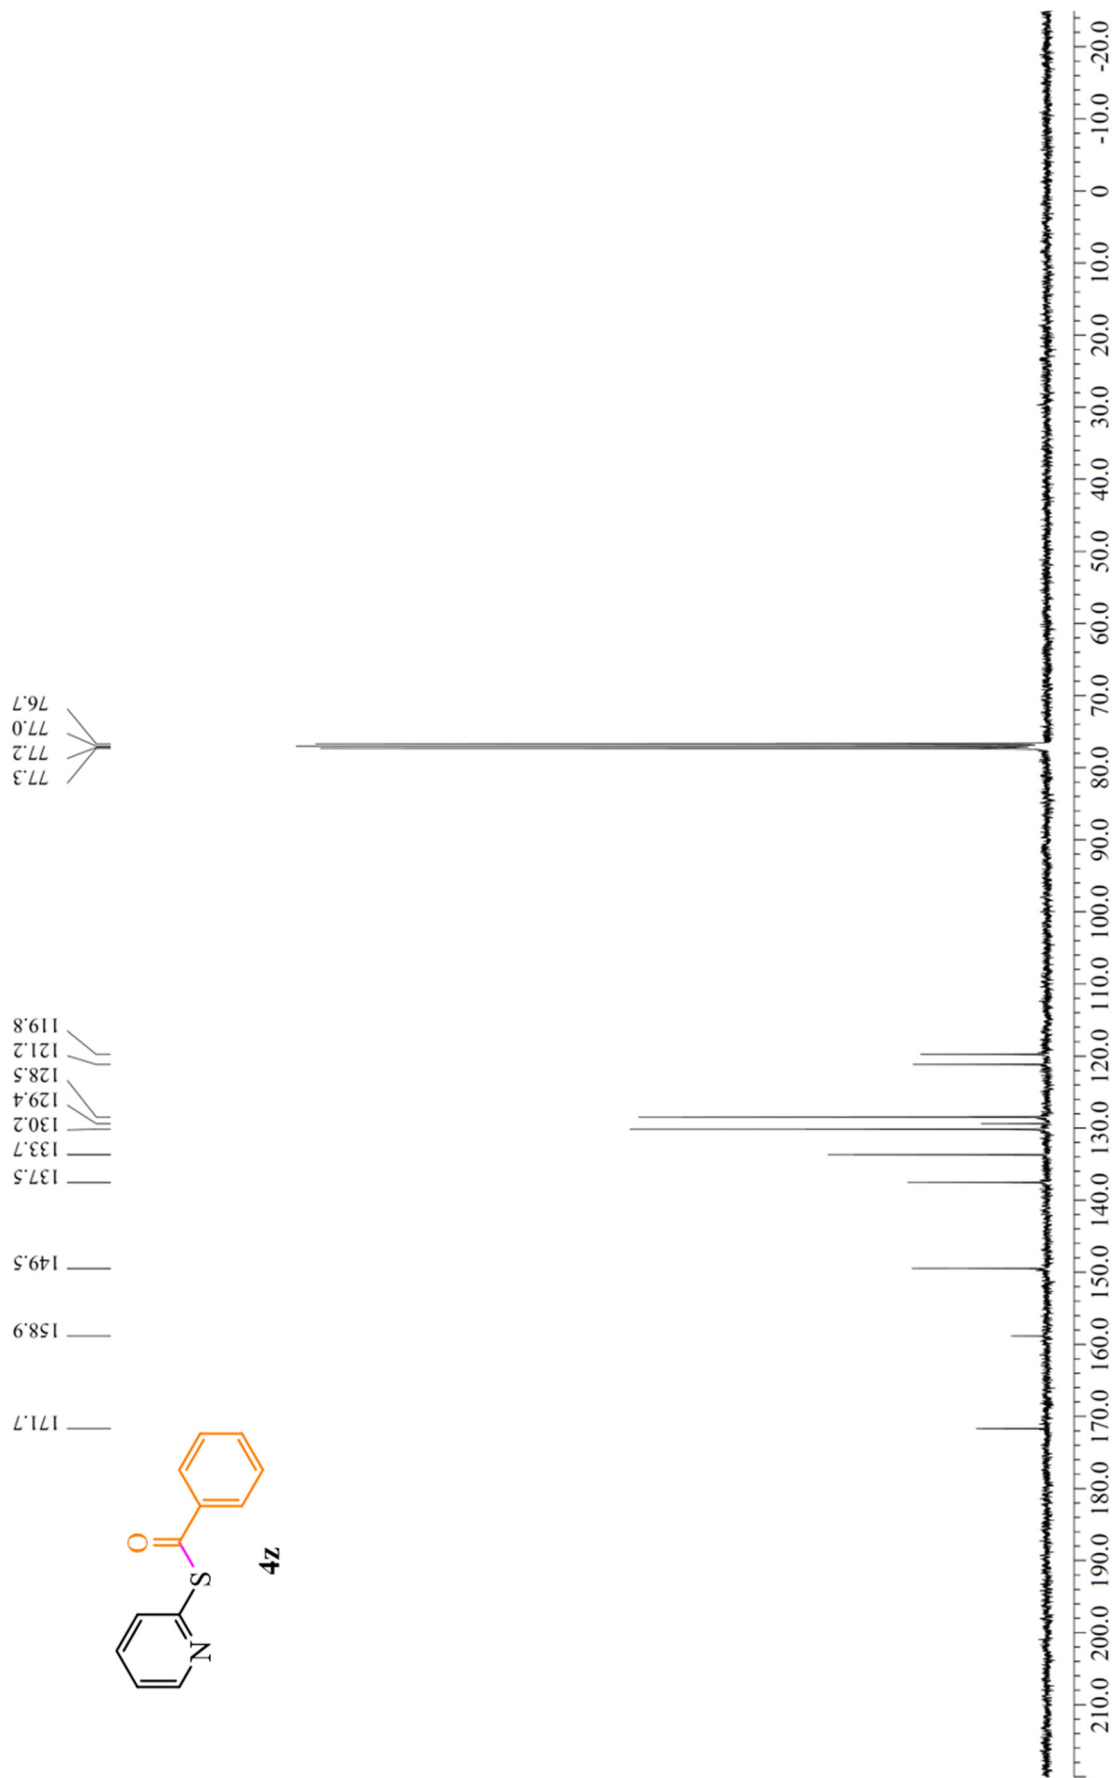

$^{13}\text{C}\{\text{H}\}$  NMR spectrum of compound **4z** (100 MHz,  $\text{CDCl}_3$ )

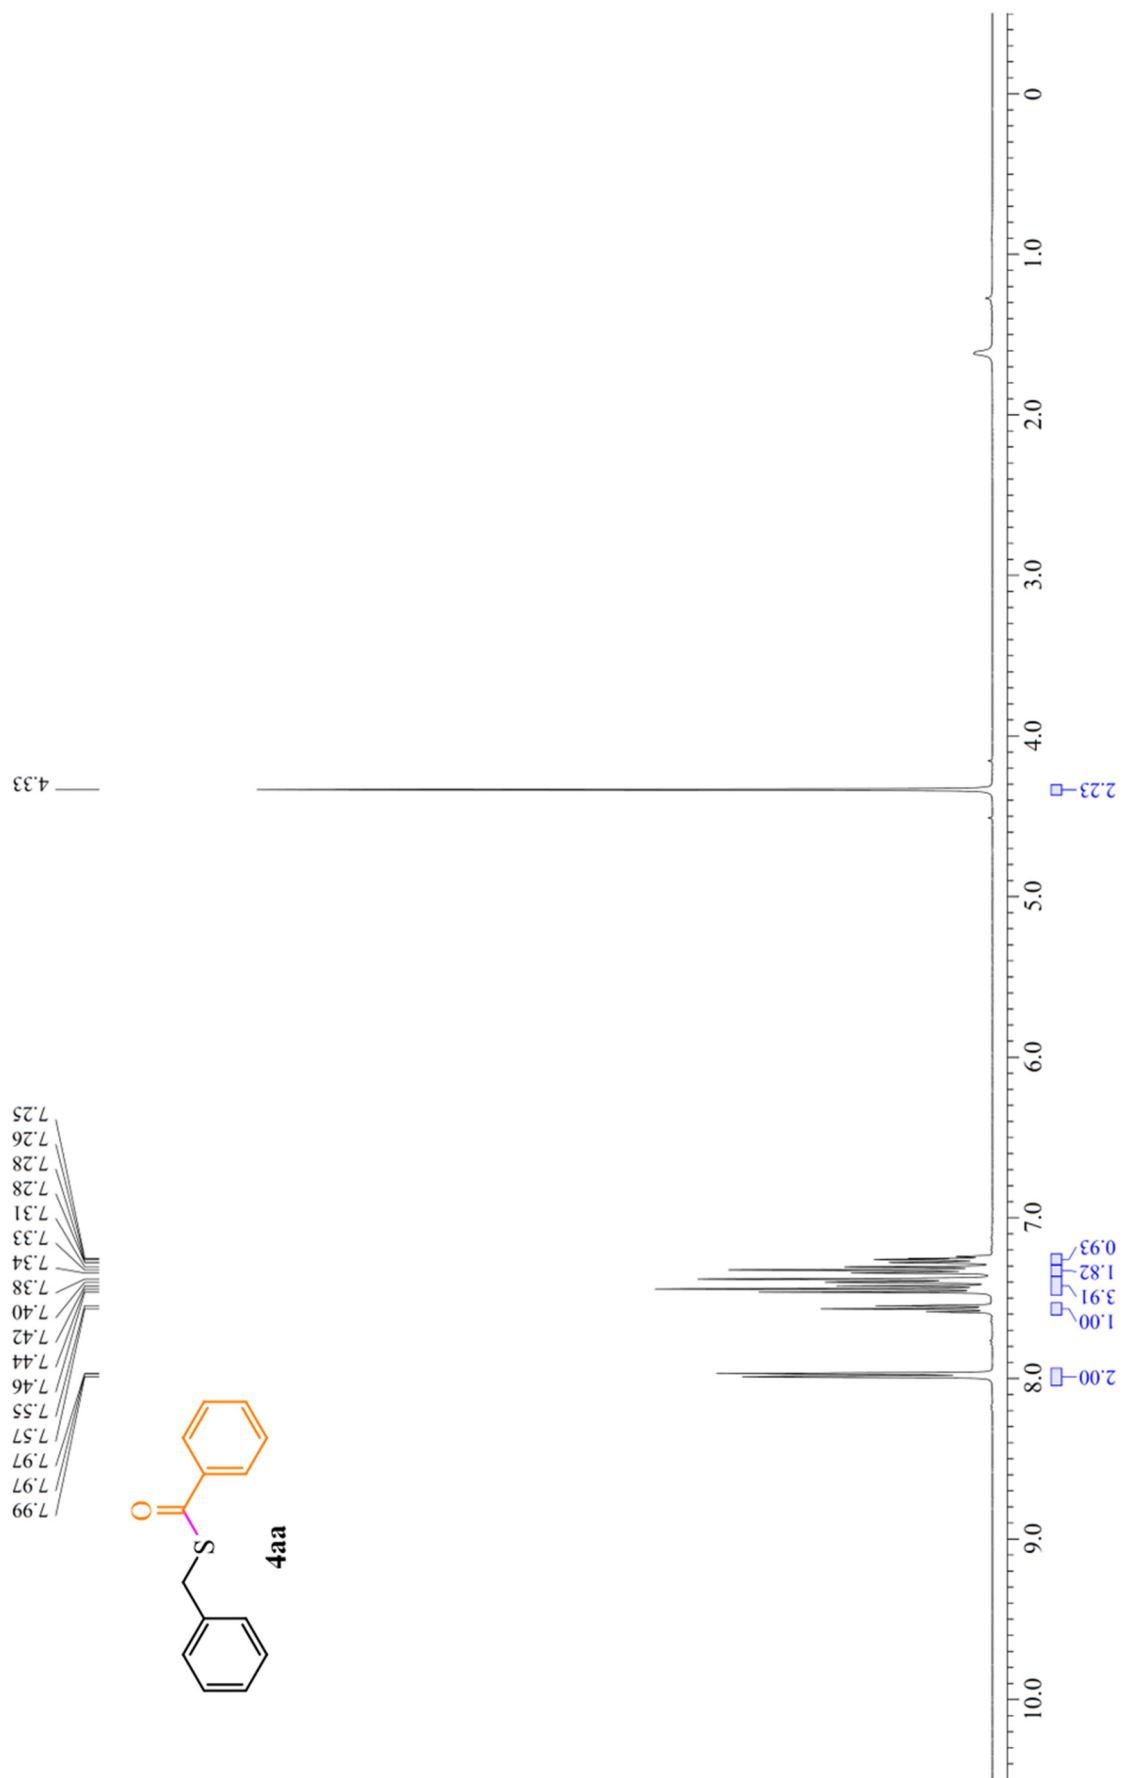

<sup>1</sup>H NMR spectrum of compound **4aa** (400 MHz, CDCl<sub>3</sub>)

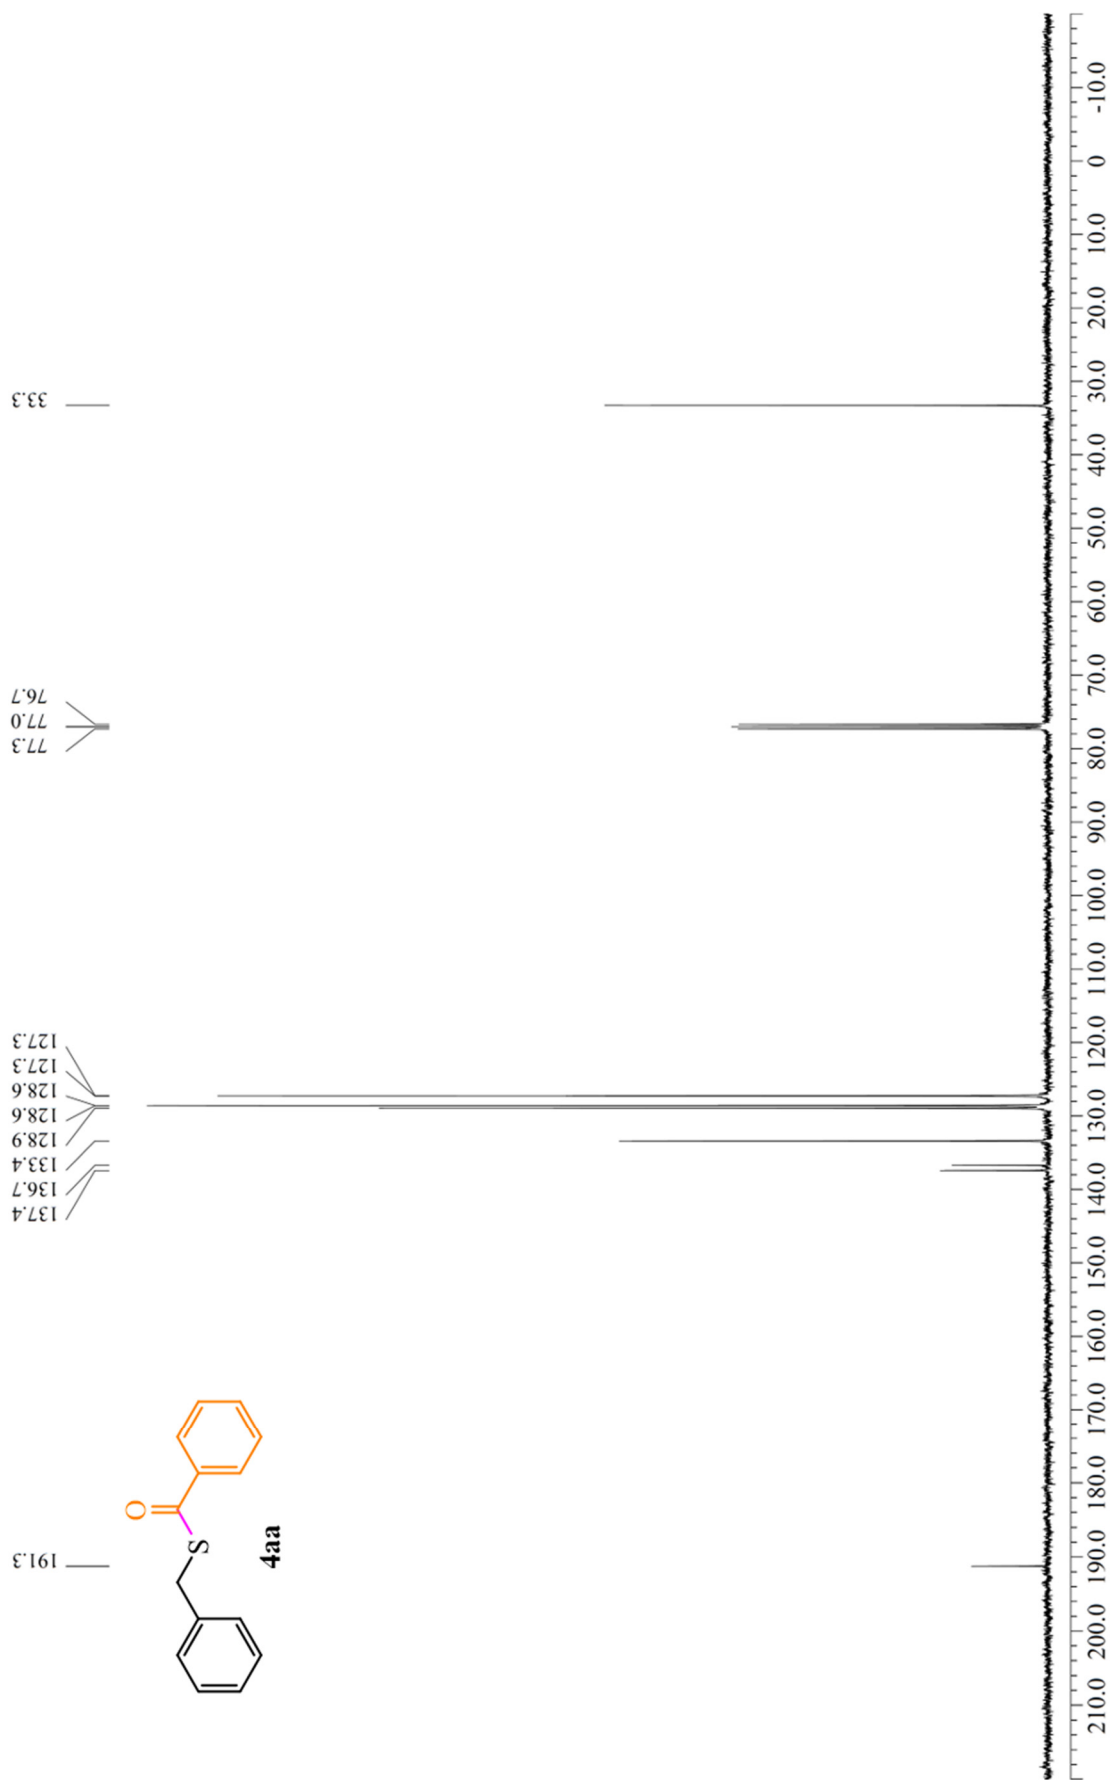

$^{13}\text{C}\{^1\text{H}\}$  NMR spectrum of compound **4aa** (100 MHz,  $\text{CDCl}_3$ )

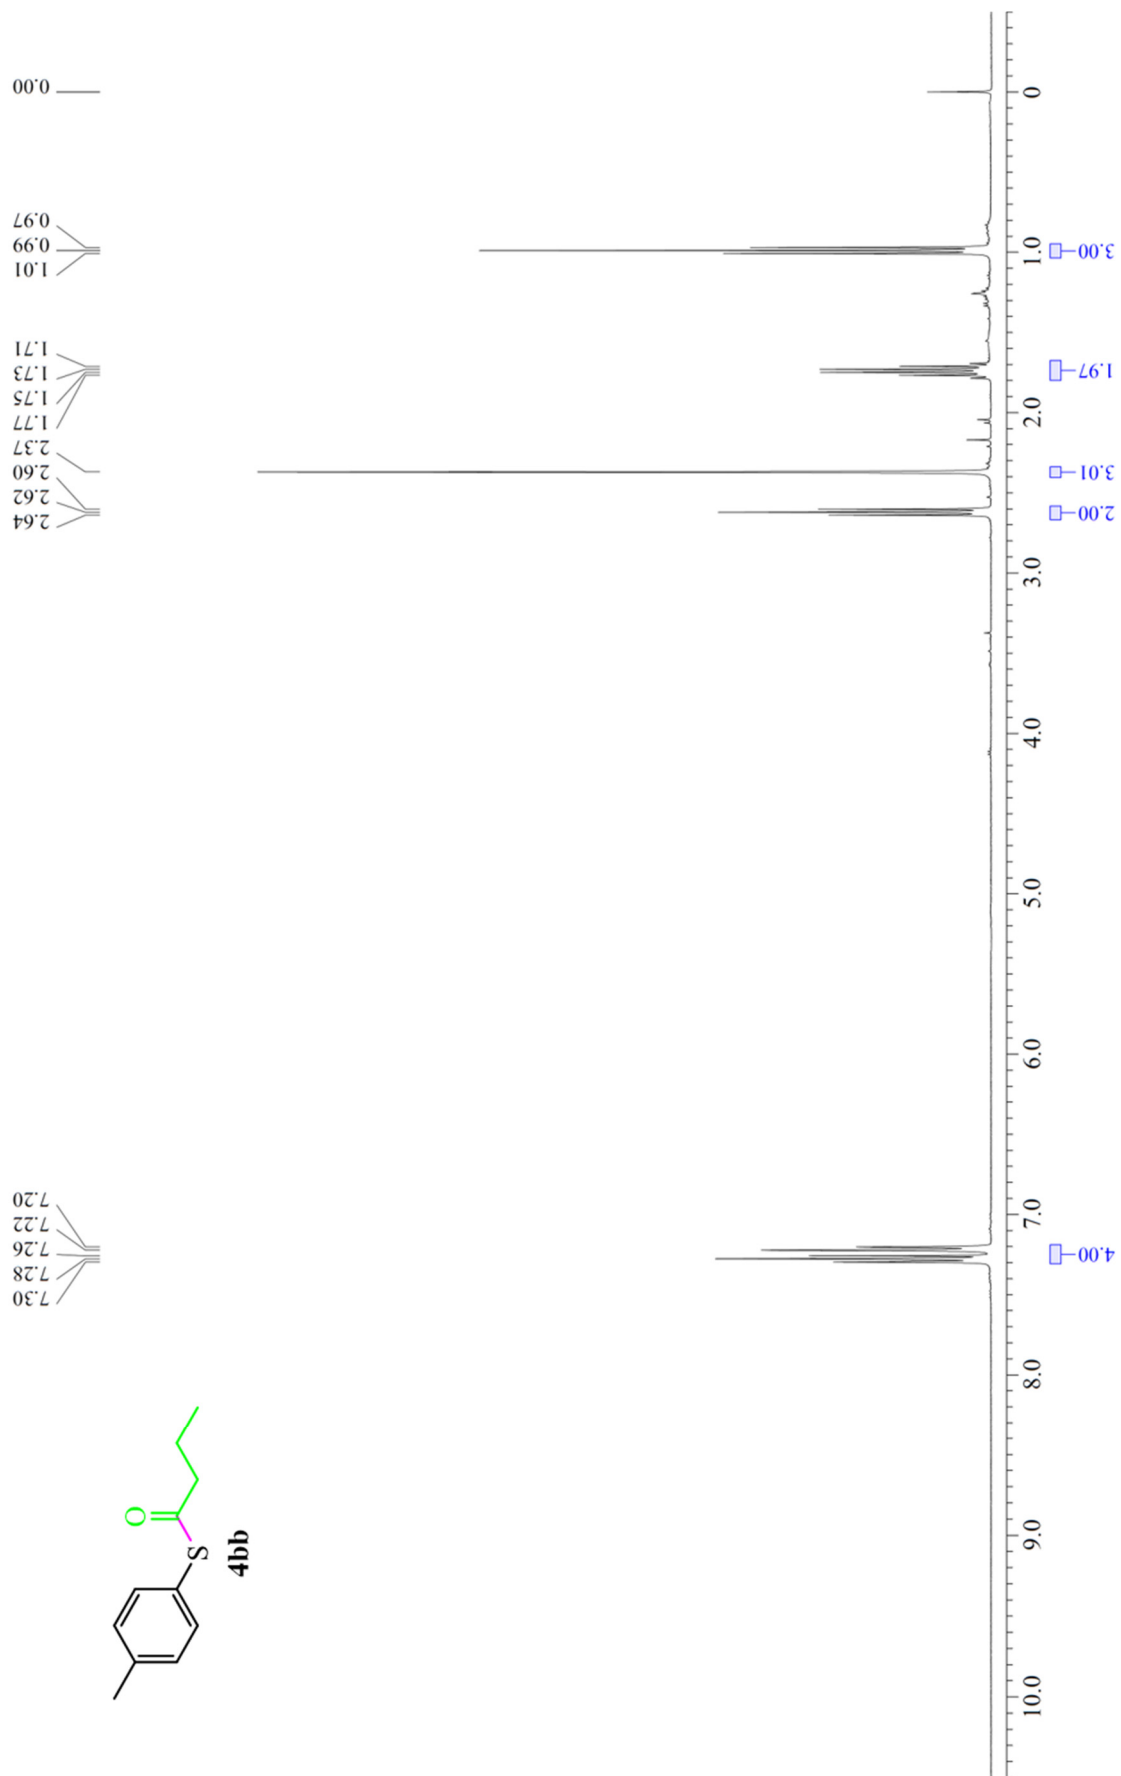

<sup>1</sup>H NMR spectrum of compound **4bb** (400 MHz, CDCl<sub>3</sub>)

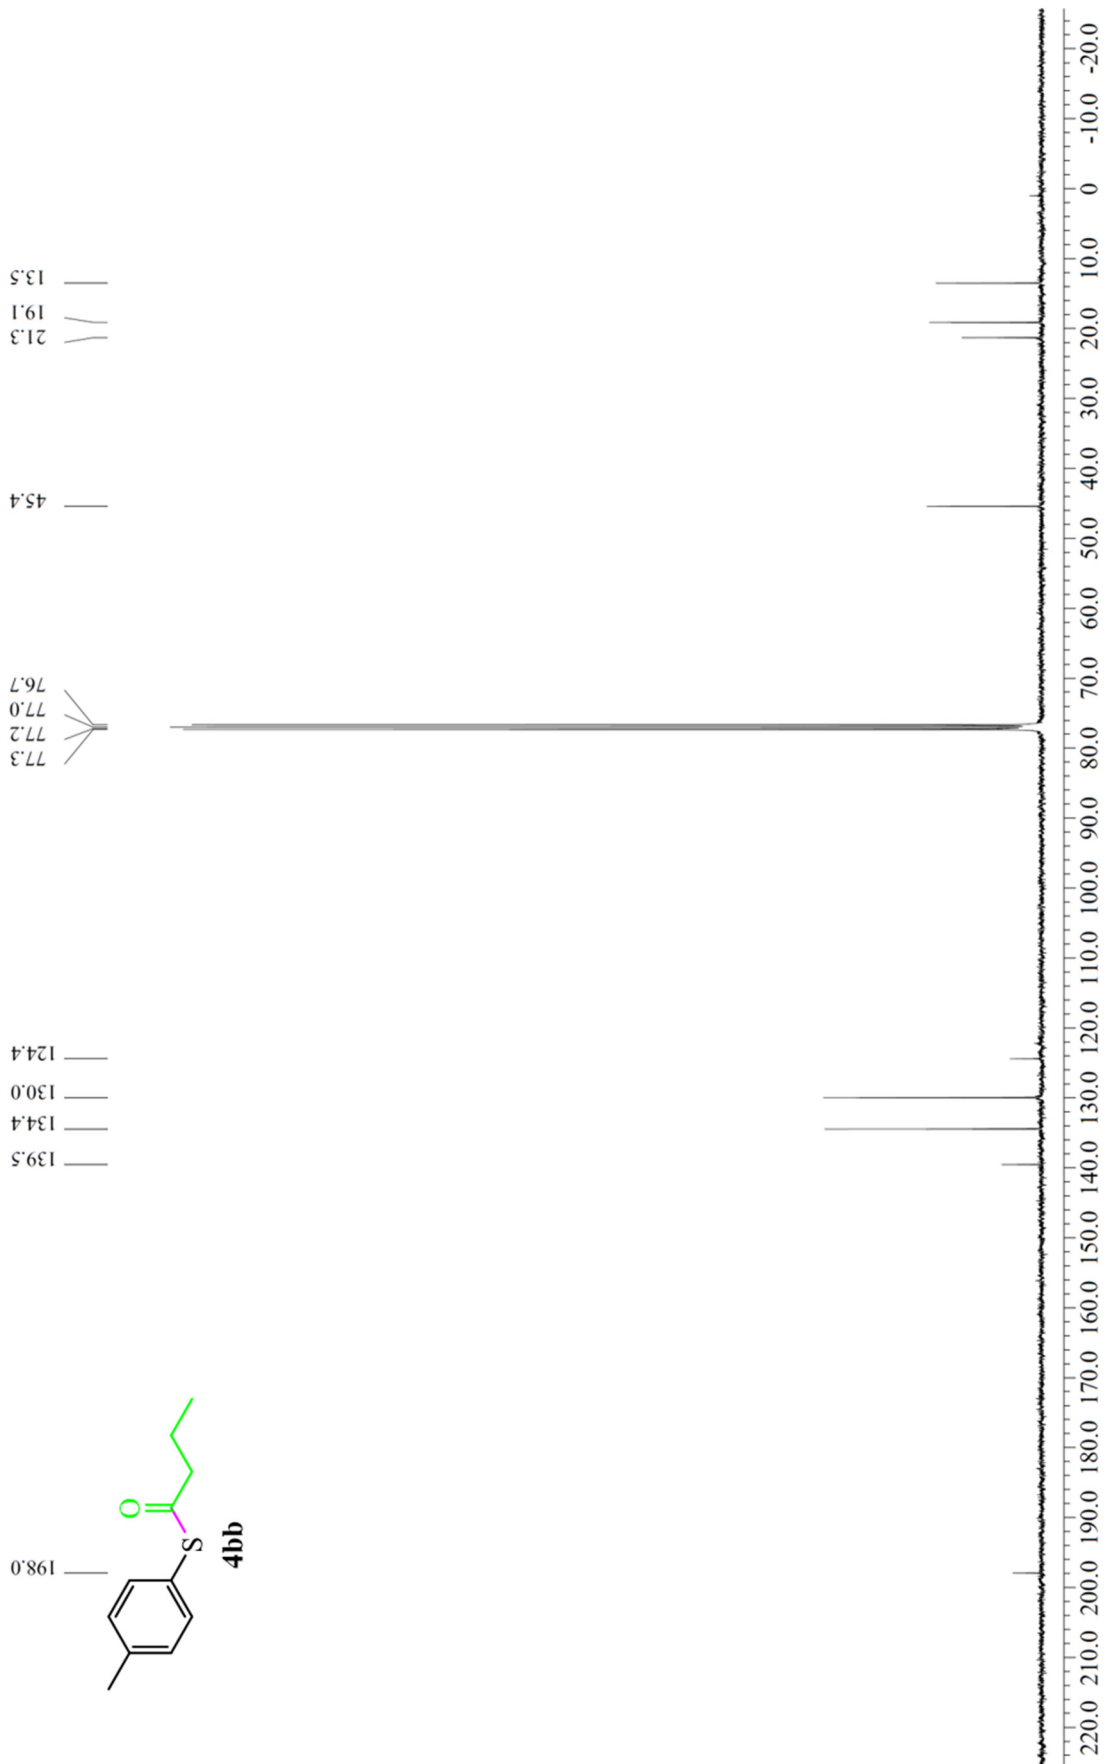

<sup>13</sup>C{<sup>1</sup>H} NMR spectrum of compound **4bb** (100 MHz, CDCl<sub>3</sub>)

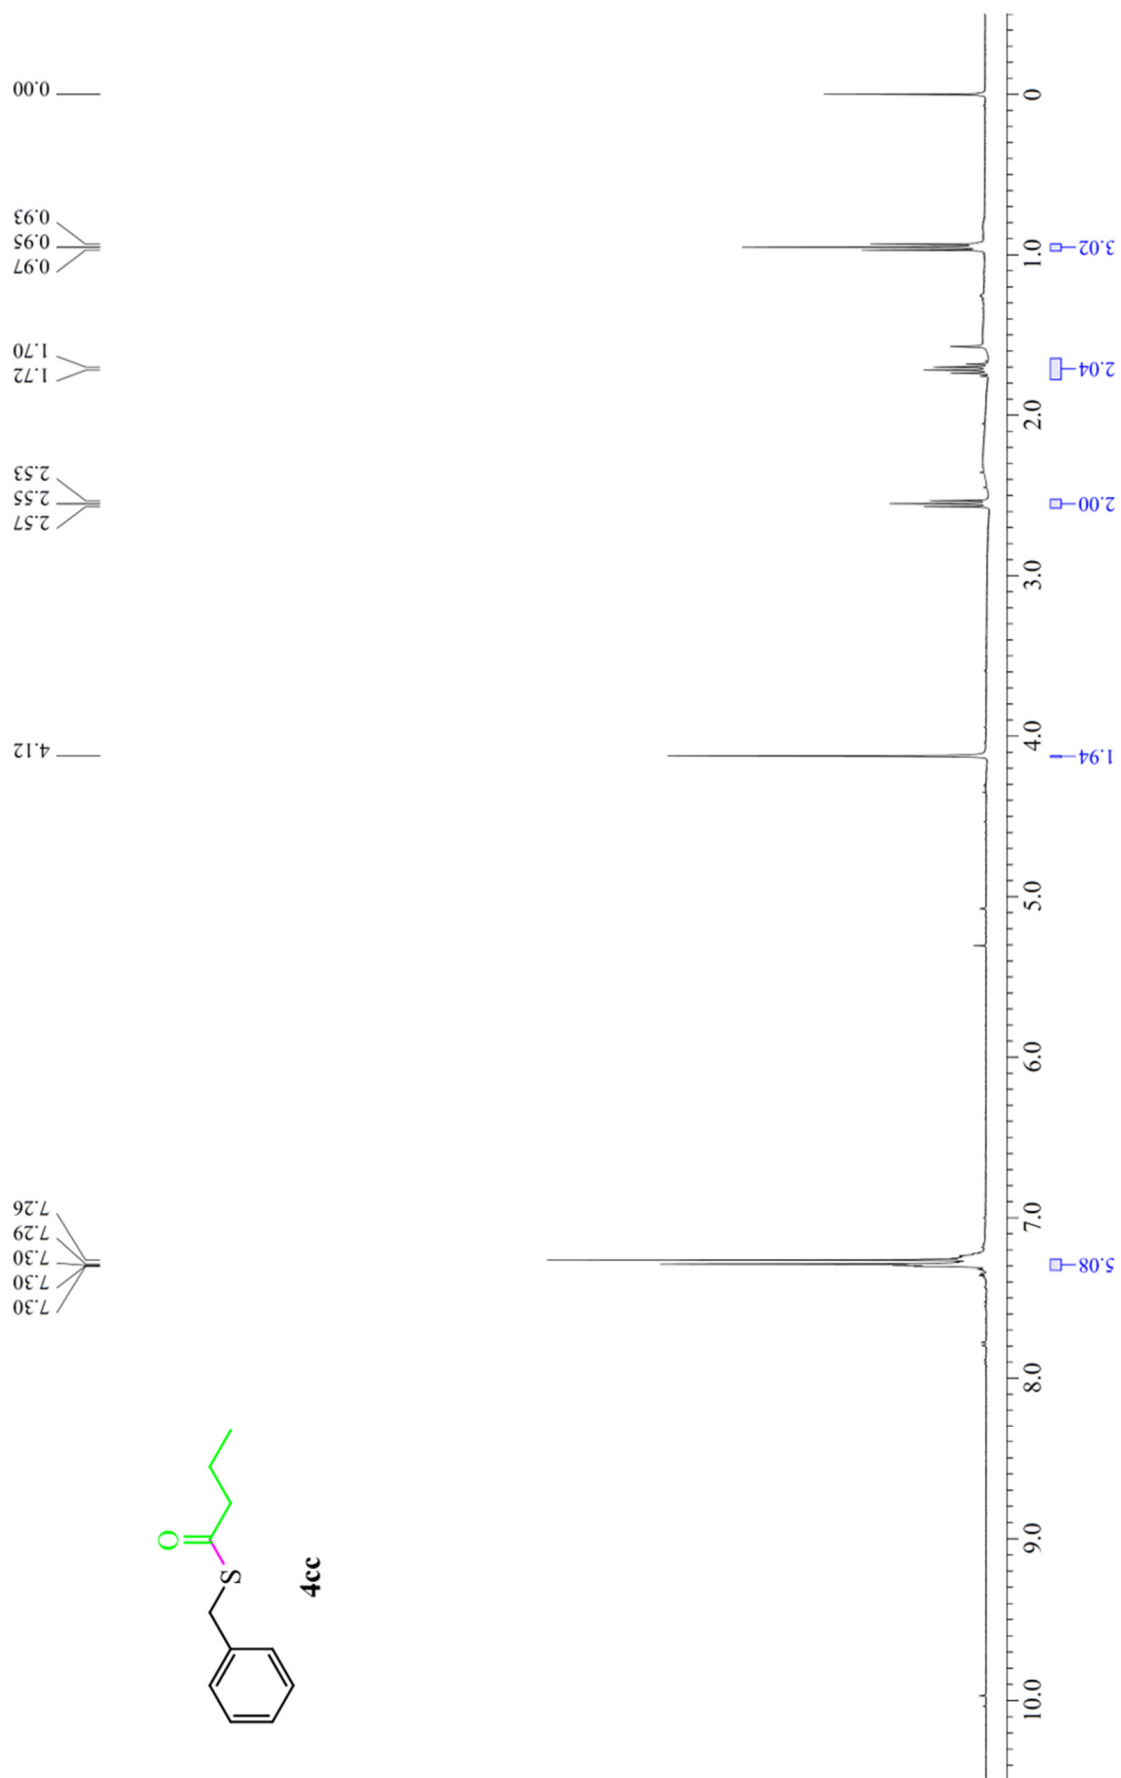

$^1\text{H}$  NMR spectrum of compound **4cc** (400 MHz,  $\text{CDCl}_3$ )

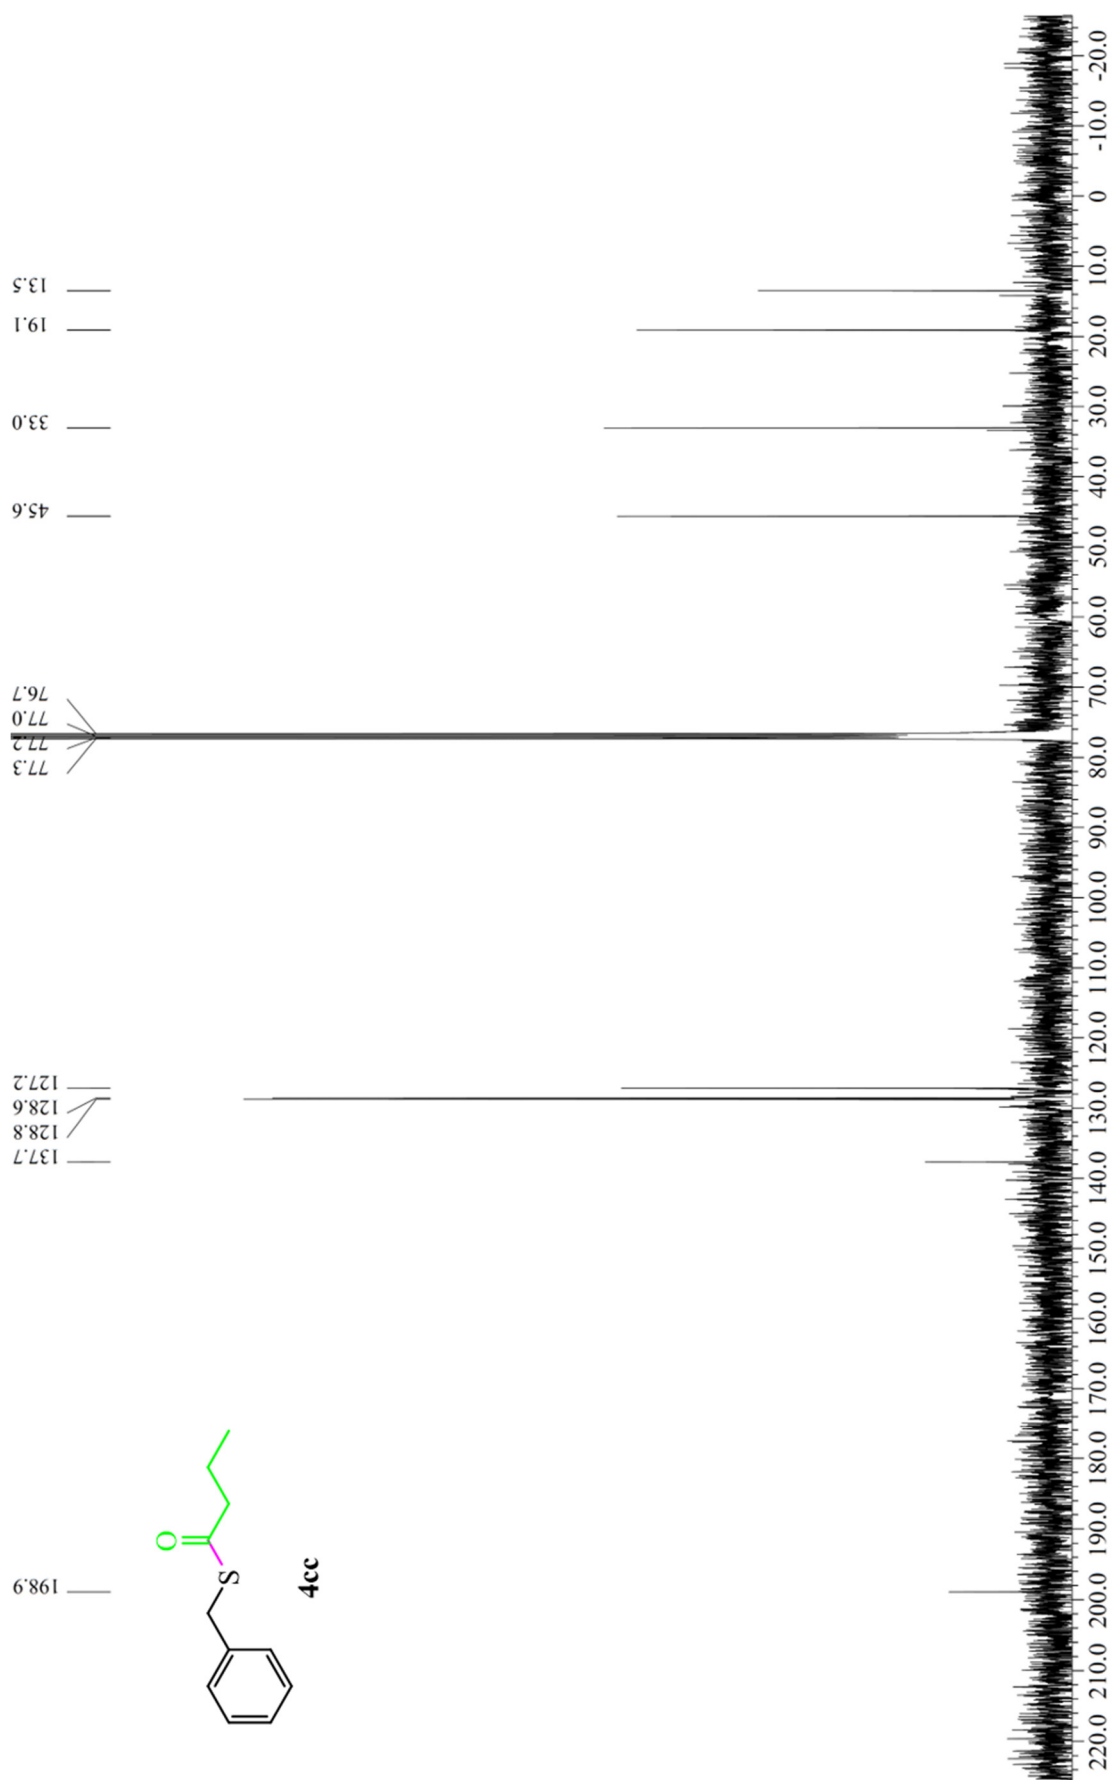

$^{13}\text{C}\{^1\text{H}\}$  NMR spectrum of compound **4cc** (100 MHz,  $\text{CDCl}_3$ )



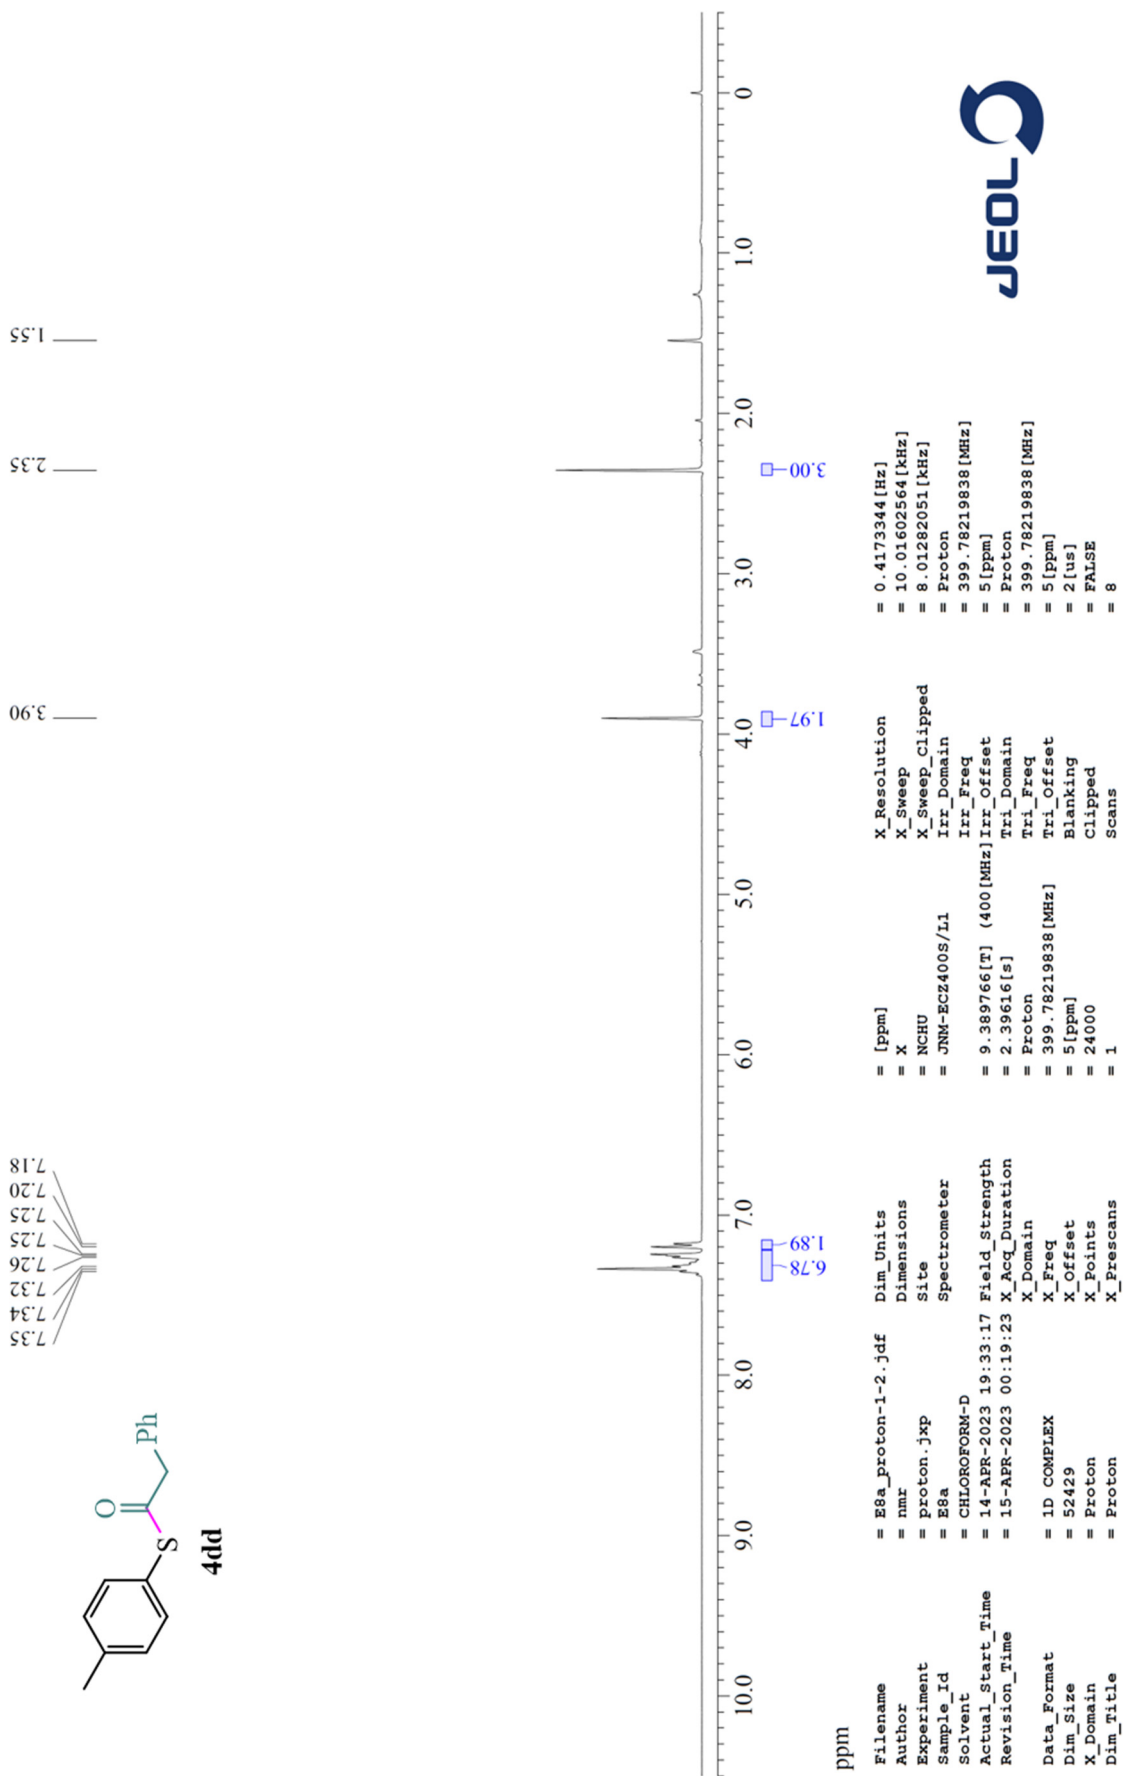

<sup>1</sup>H NMR spectrum of compound **4dd** (400 MHz, CDCl<sub>3</sub>)

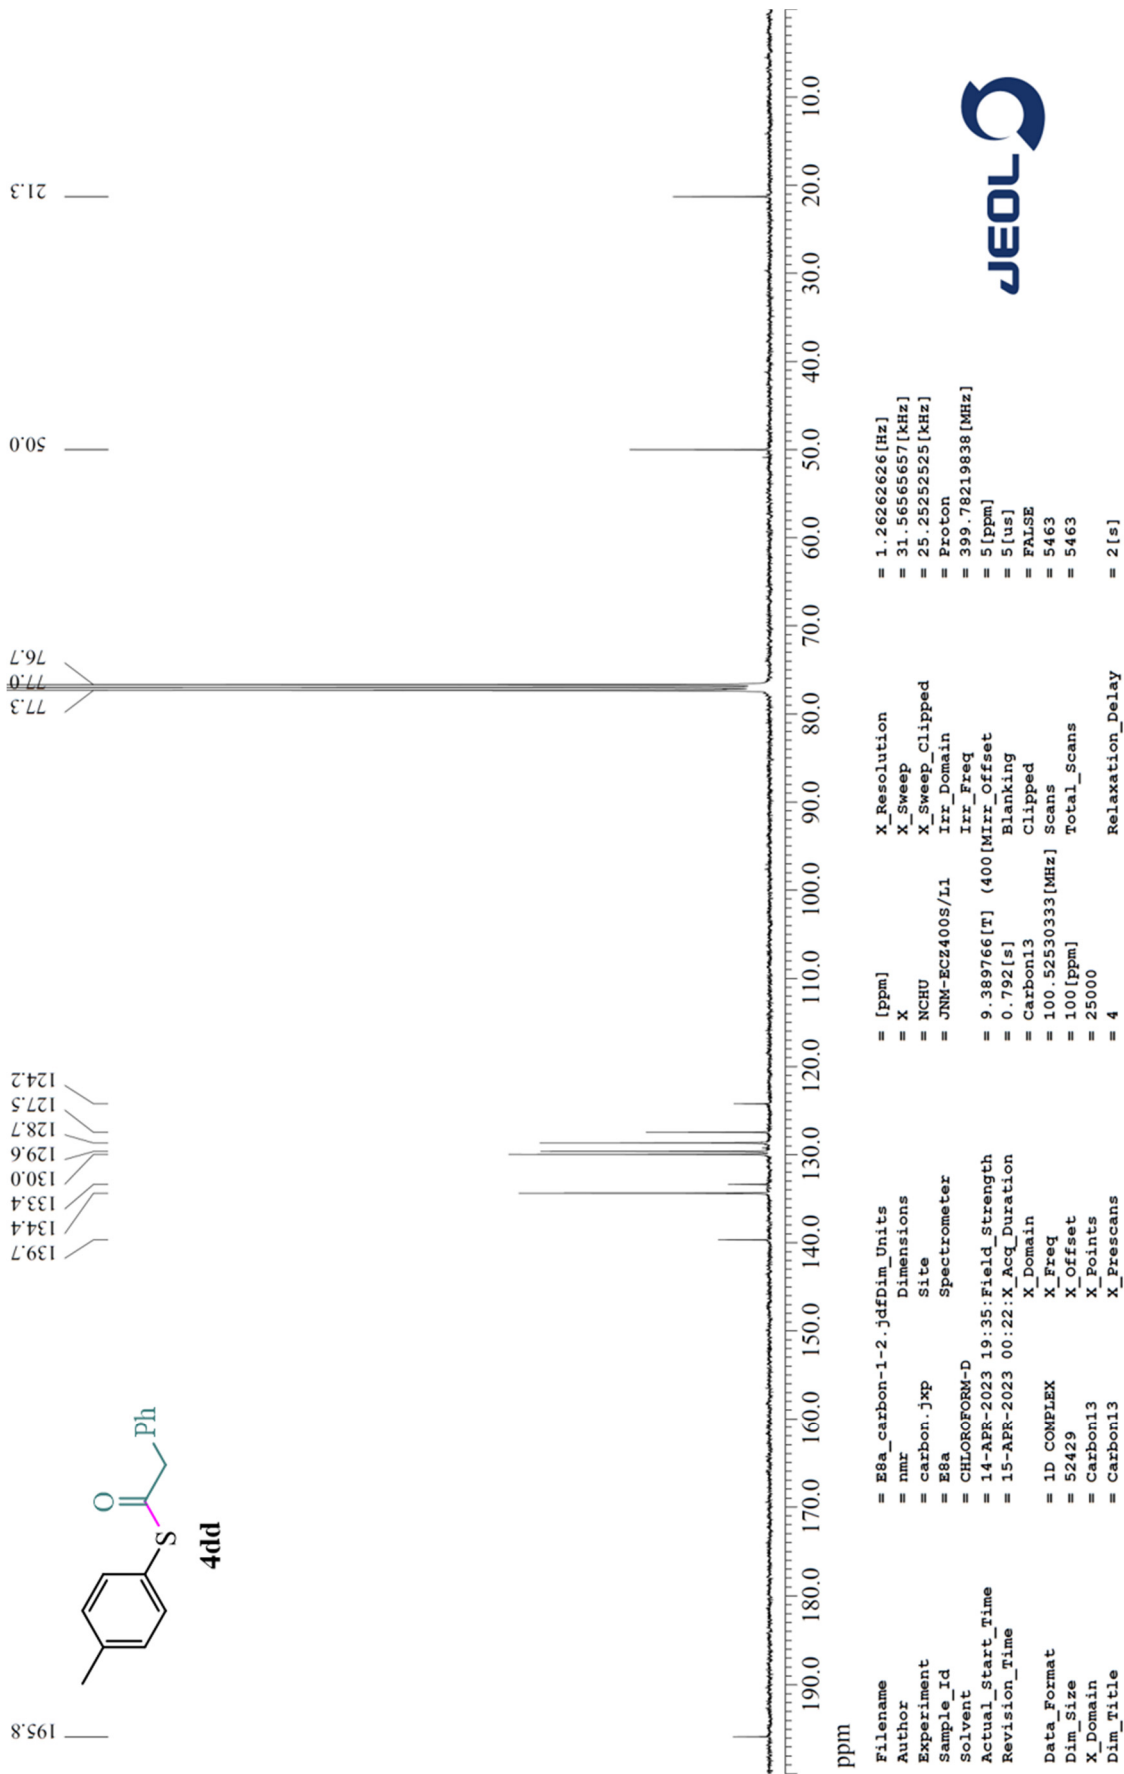

<sup>13</sup>C{H} NMR spectrum of compound **4dd** (100 MHz, CDCl<sub>3</sub>)

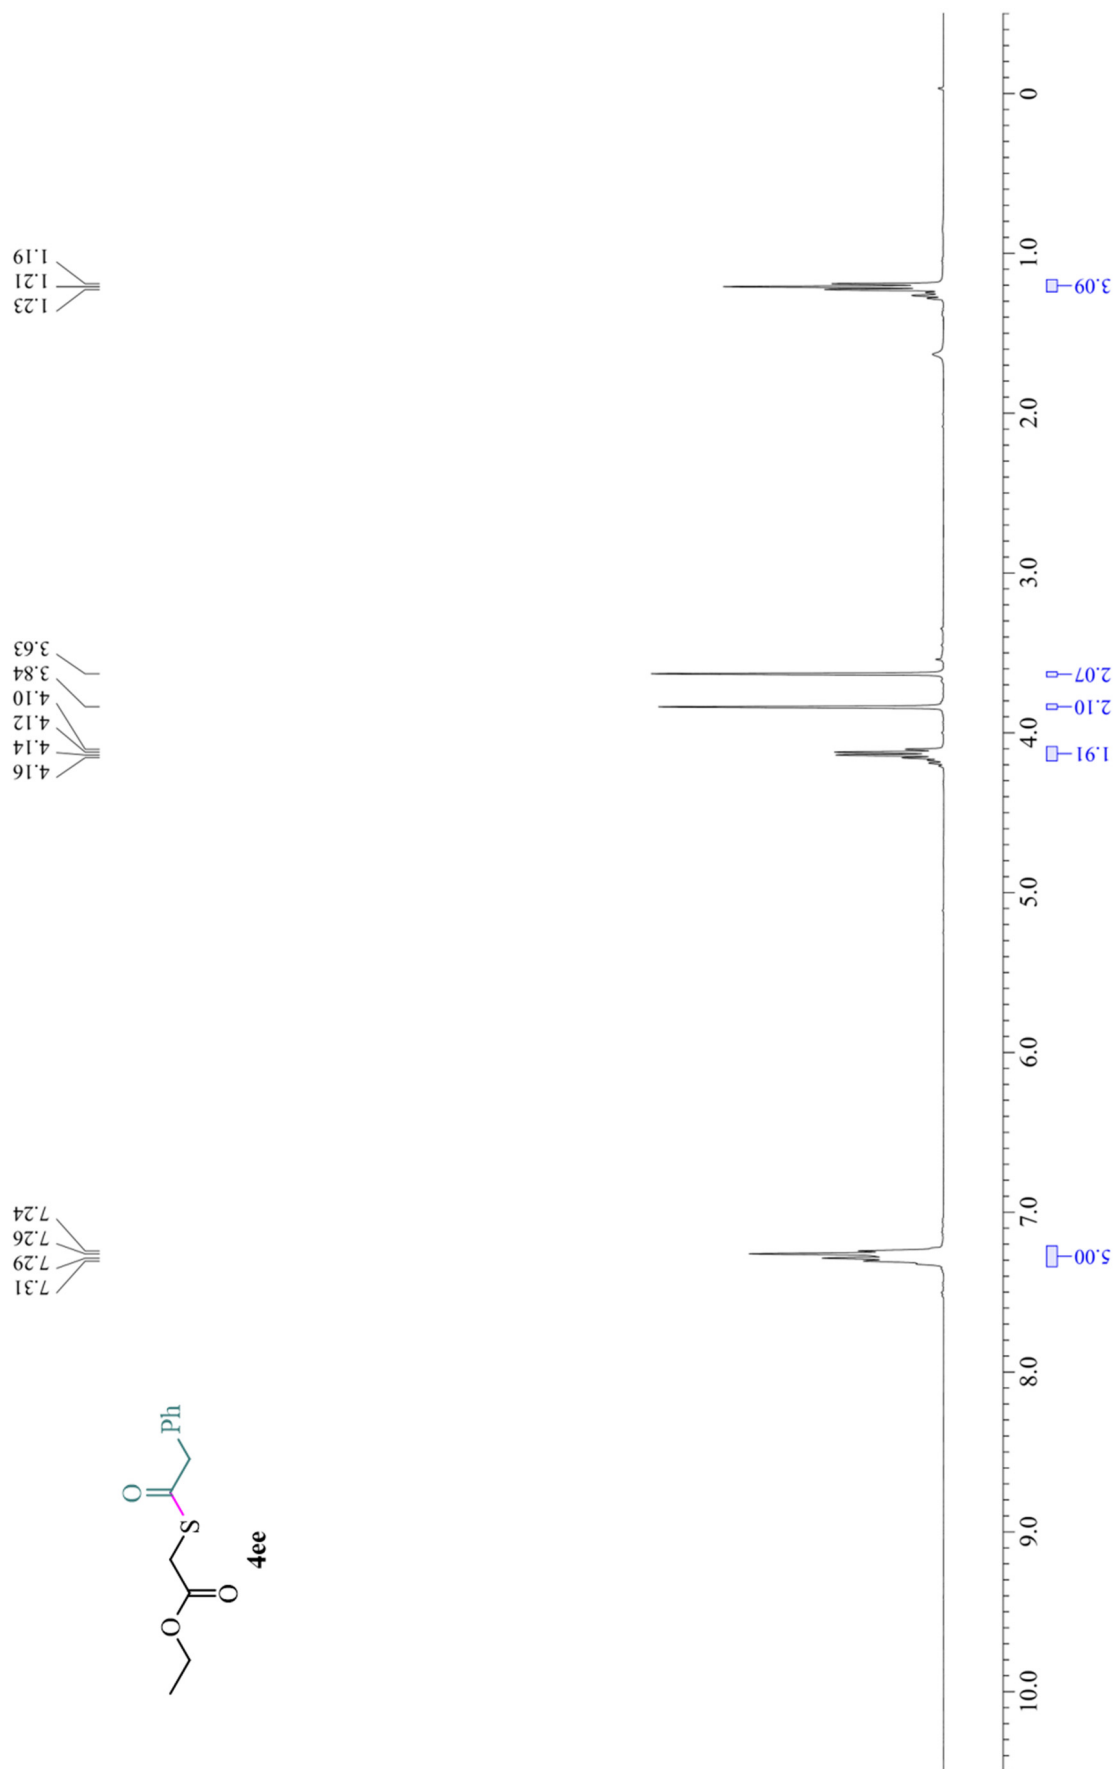

<sup>1</sup>H NMR spectrum of compound **4ee** (400 MHz, CDCl<sub>3</sub>)

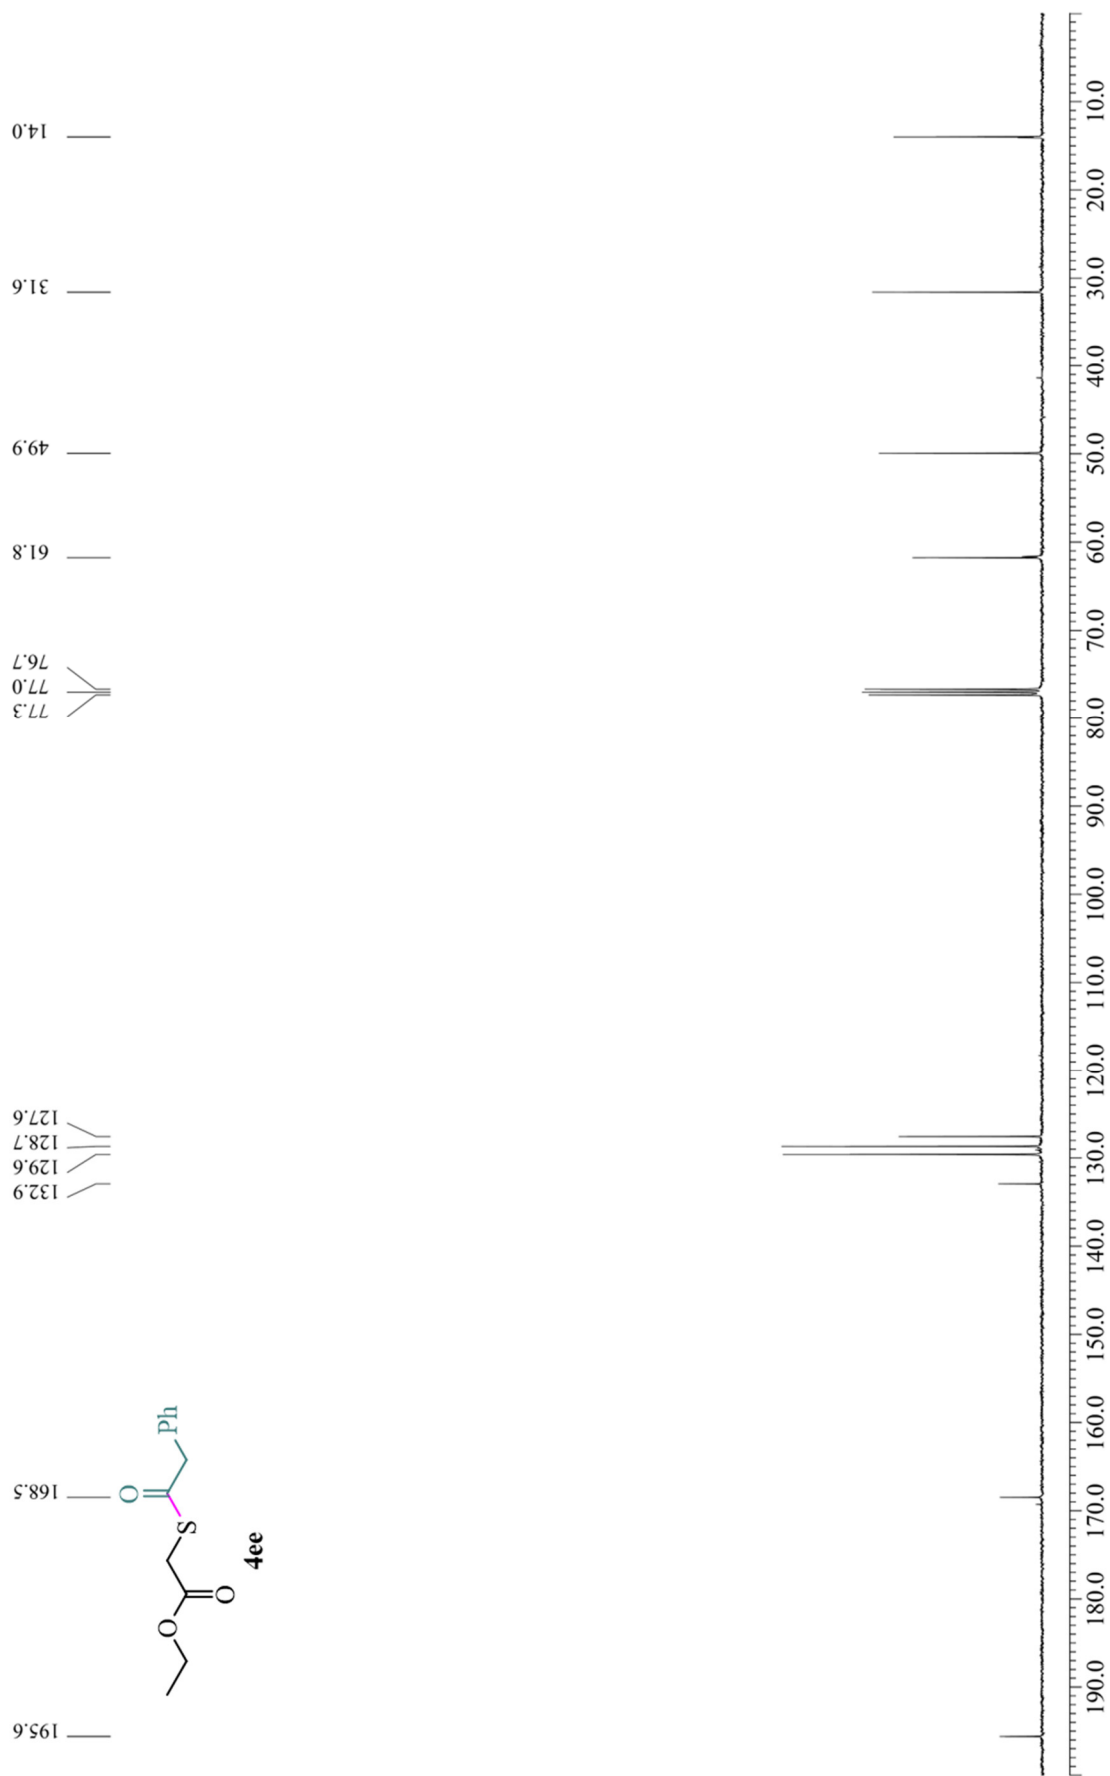

$^{13}\text{C}\{^1\text{H}\}$  NMR spectrum of compound **4ee** (100 MHz,  $\text{CDCl}_3$ )

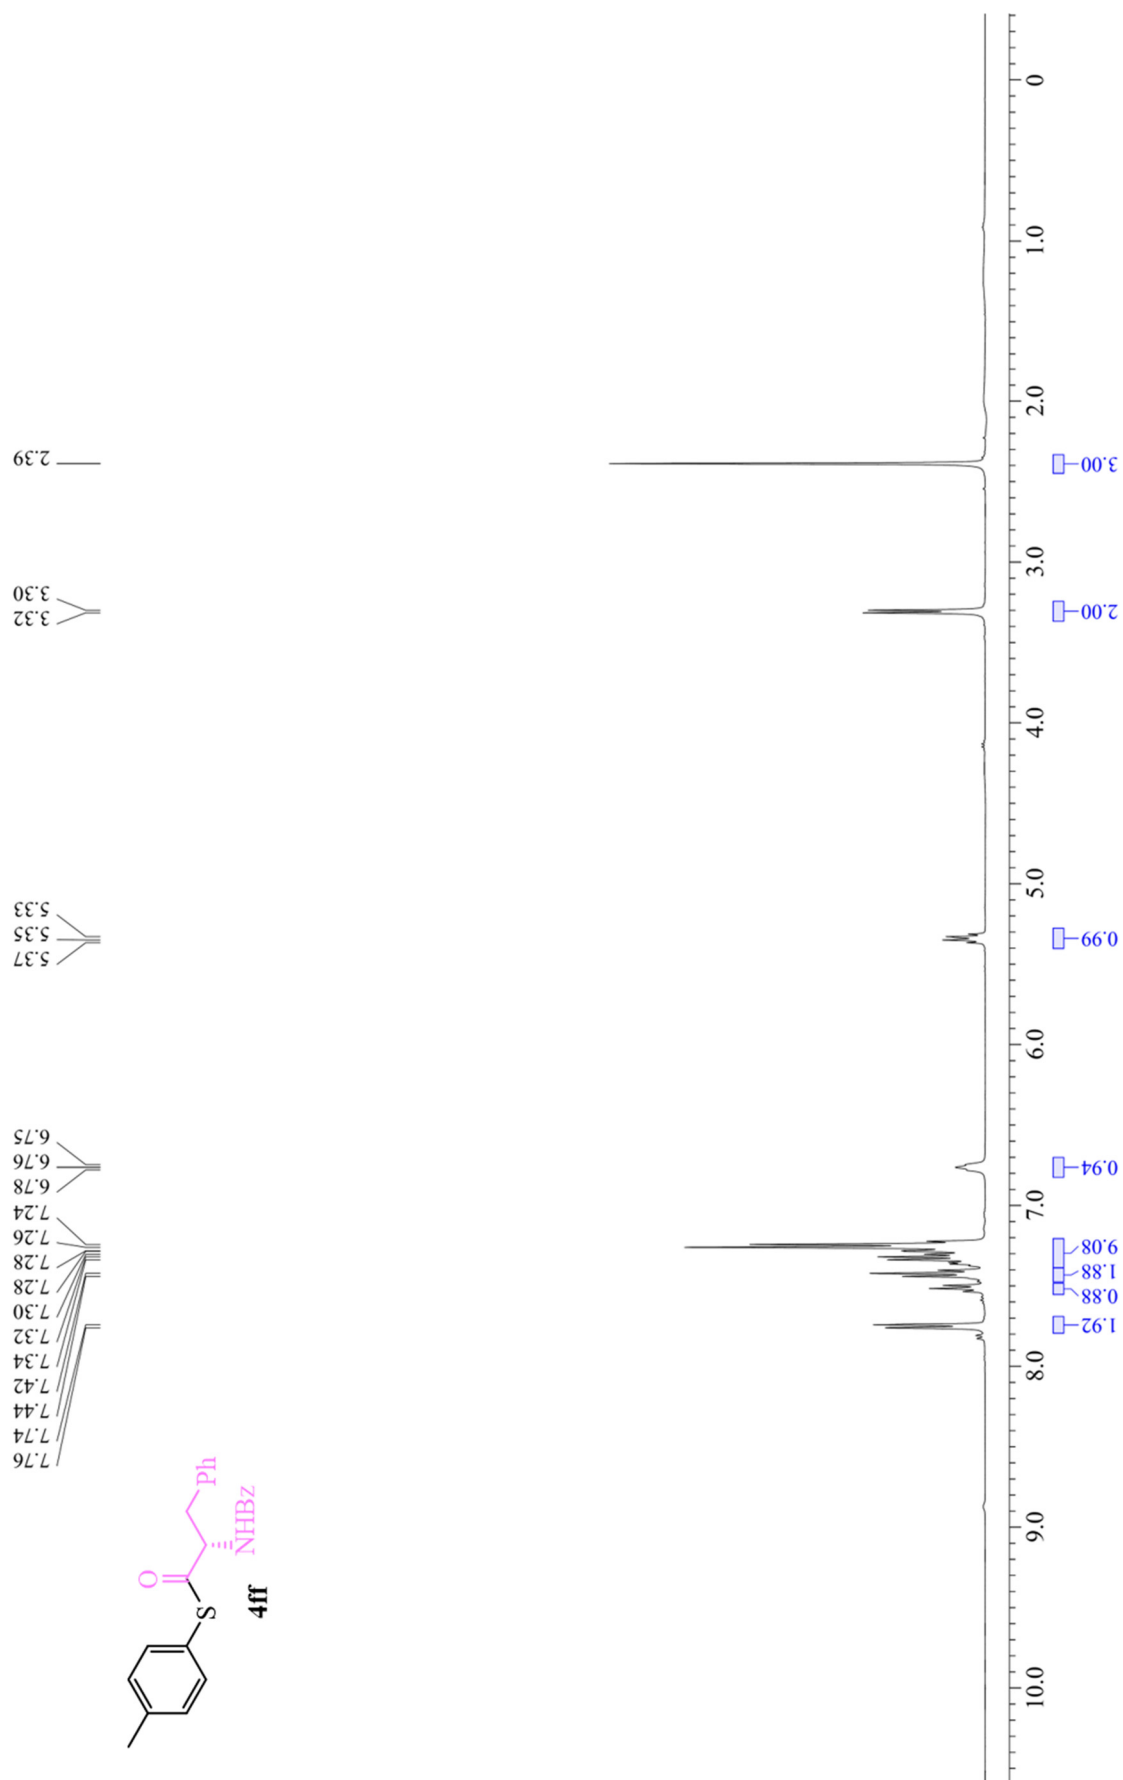

<sup>1</sup>H NMR spectrum of compound **4ff** (400 MHz, CDCl<sub>3</sub>)

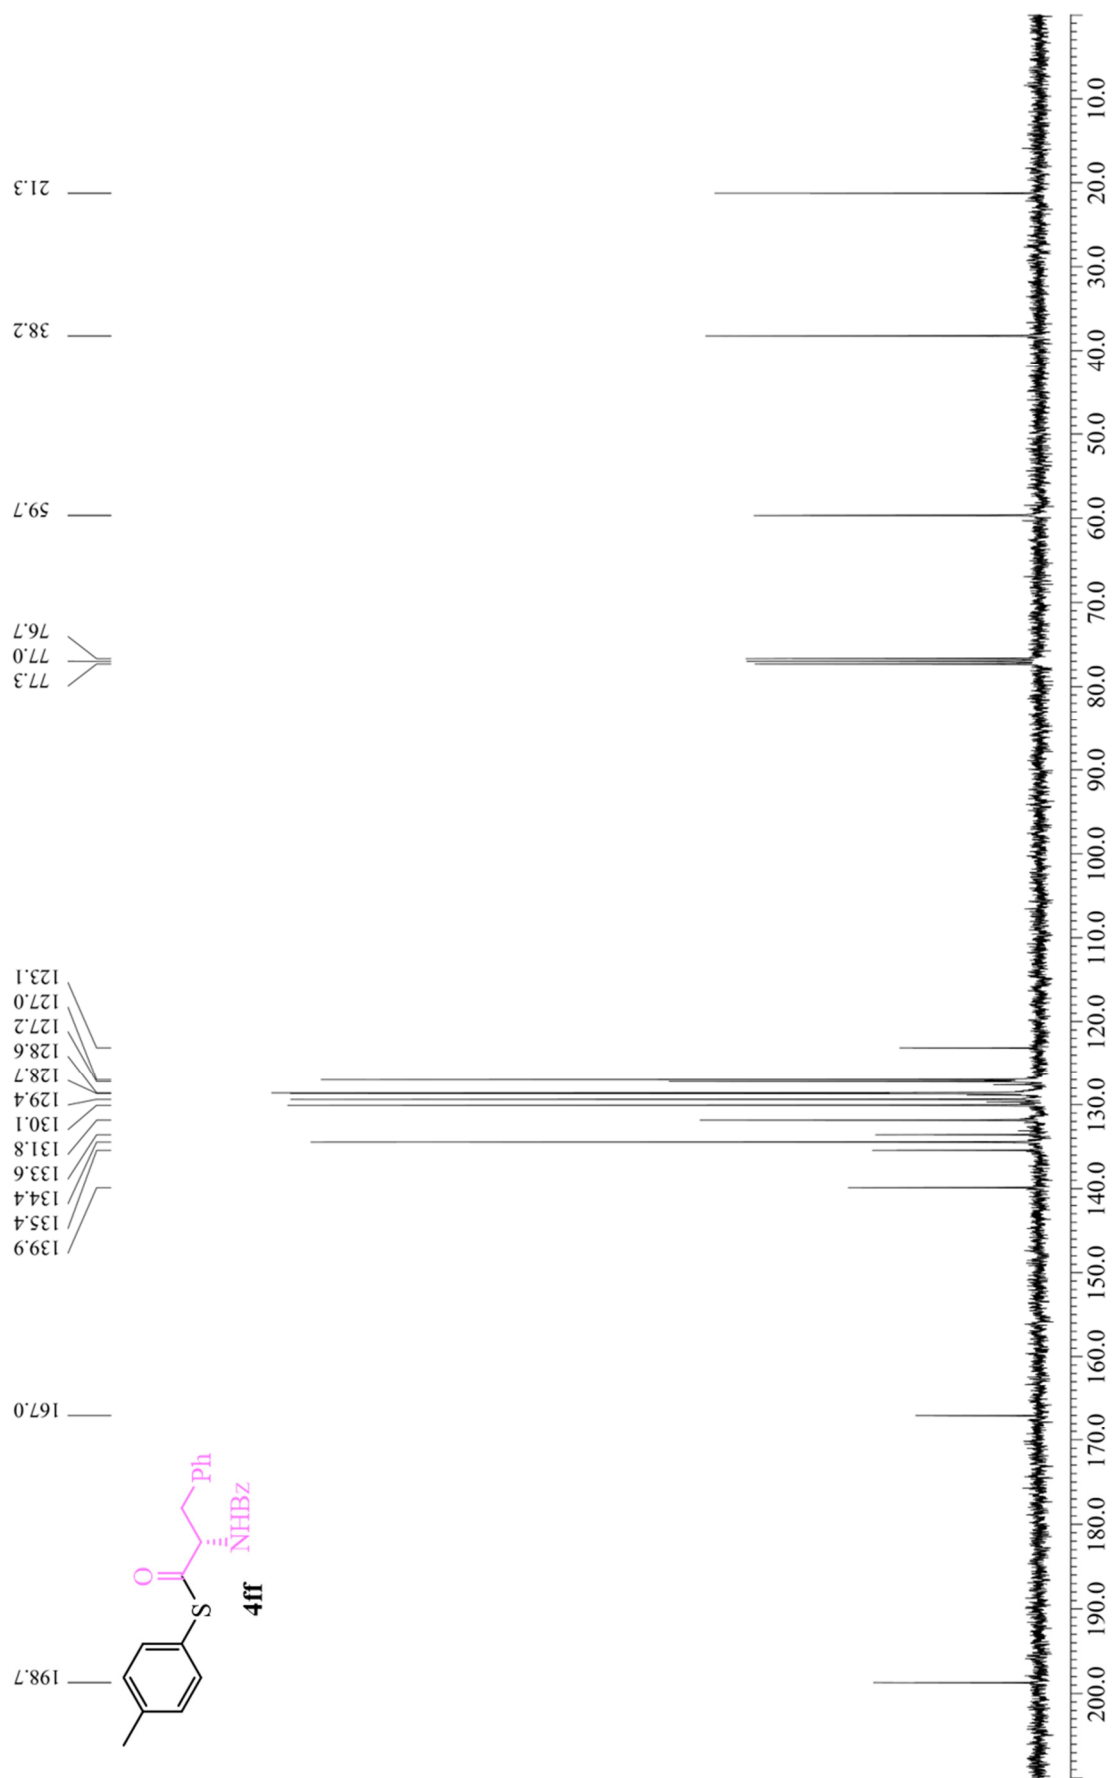

$^{13}\text{C}\{^1\text{H}\}$  NMR spectrum of compound **4ff** (100 MHz,  $\text{CDCl}_3$ )

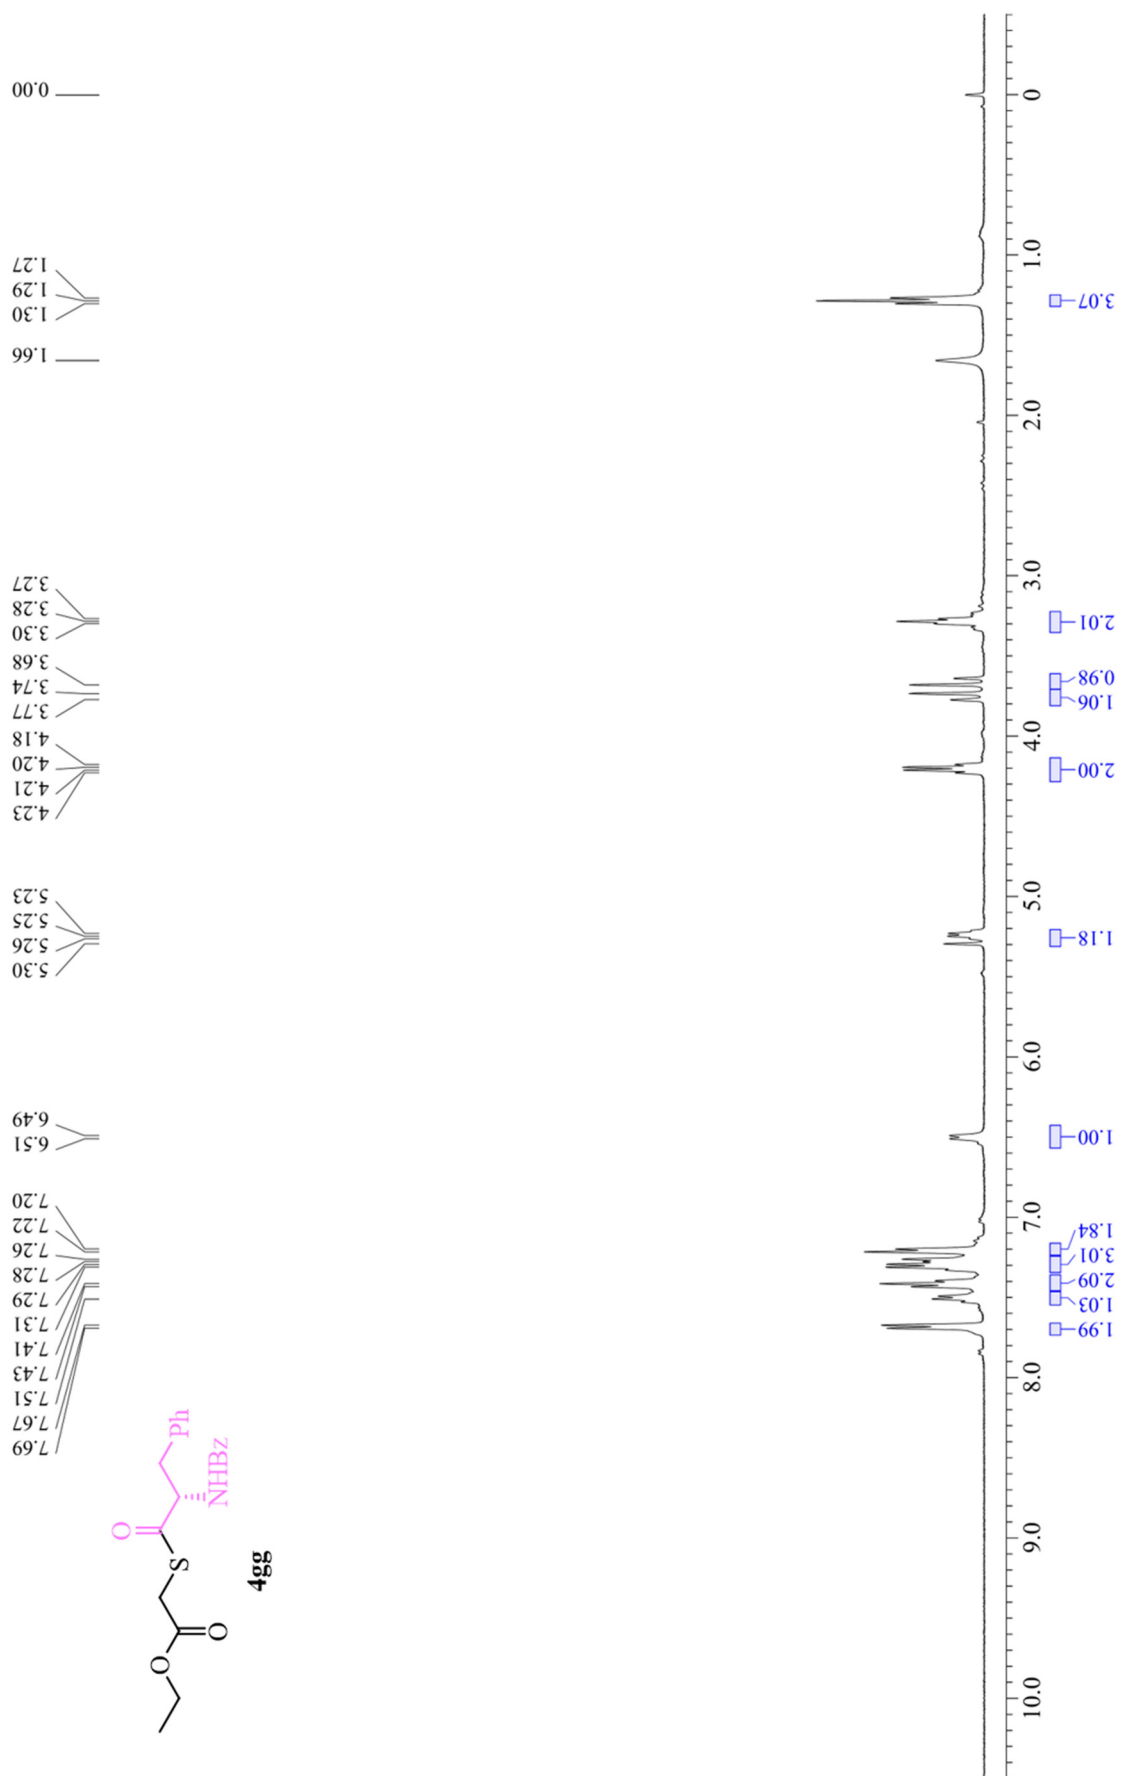

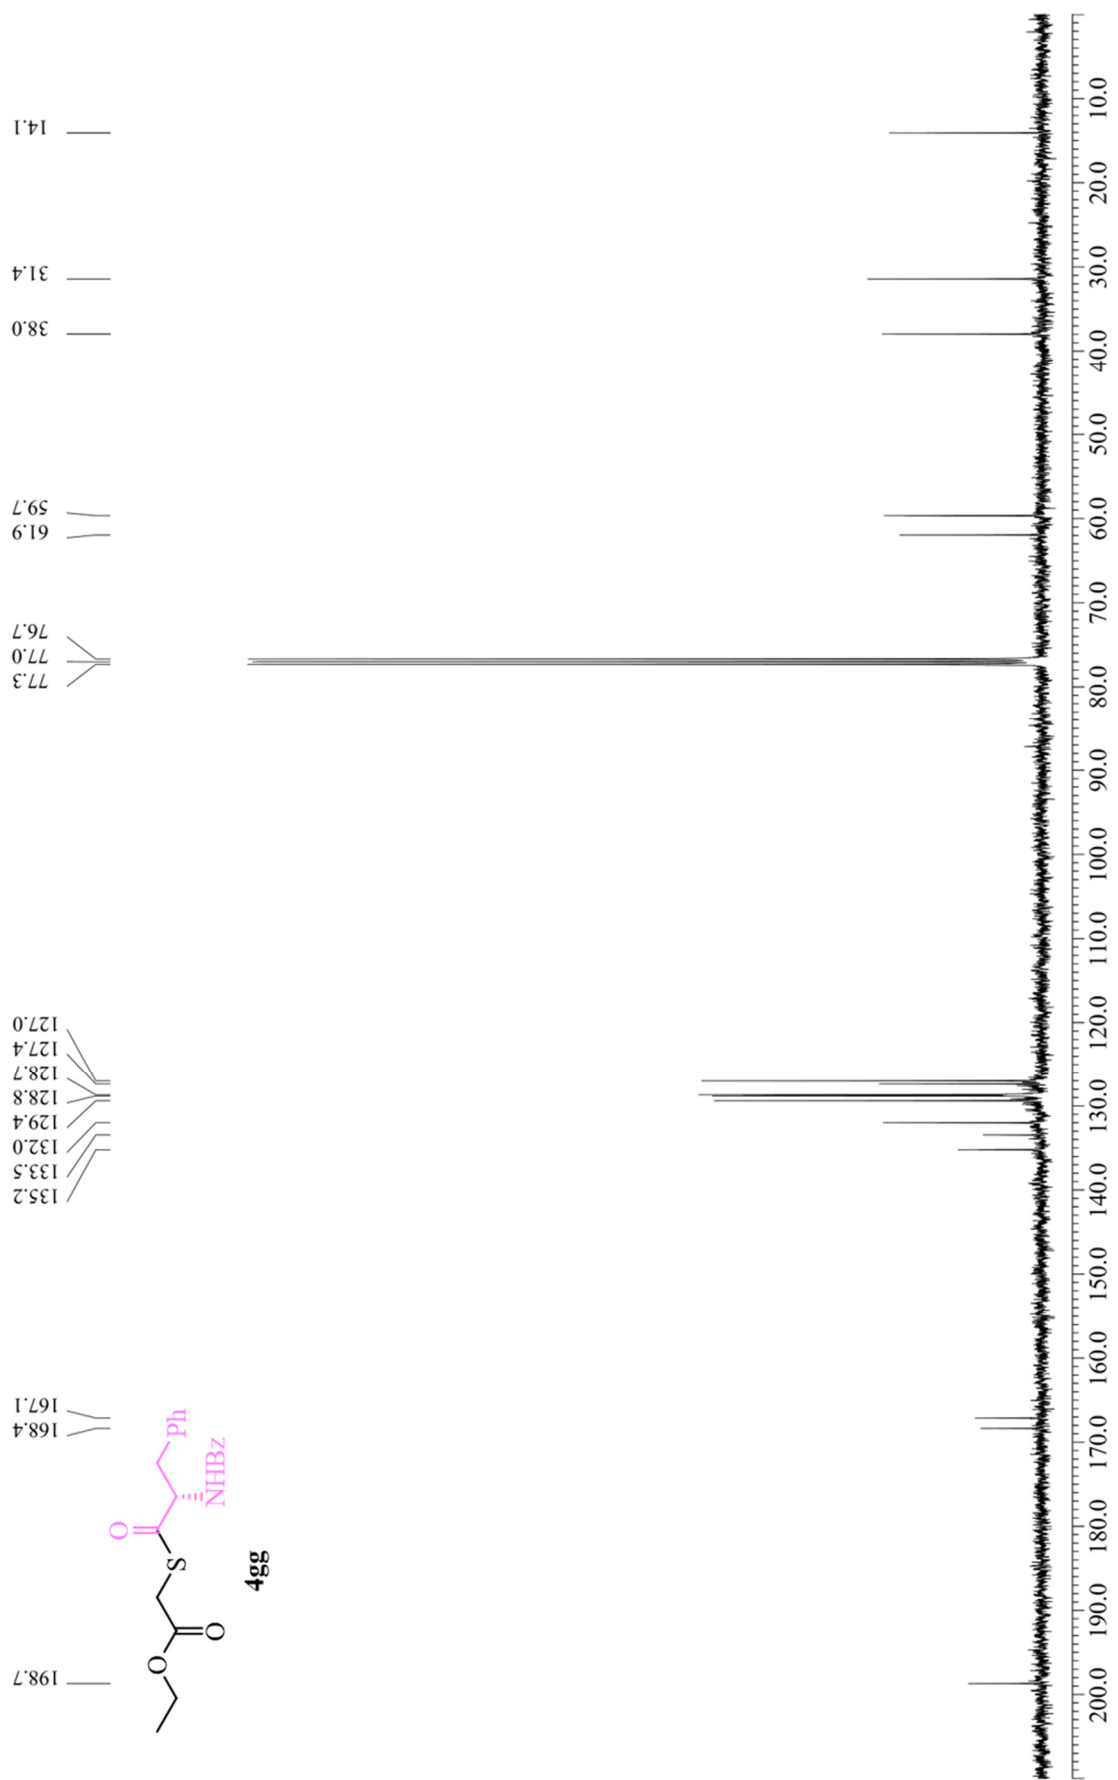

$^{13}\text{C}\{^1\text{H}\}$  NMR spectrum of compound **4gg** (100 MHz,  $\text{CDCl}_3$ )



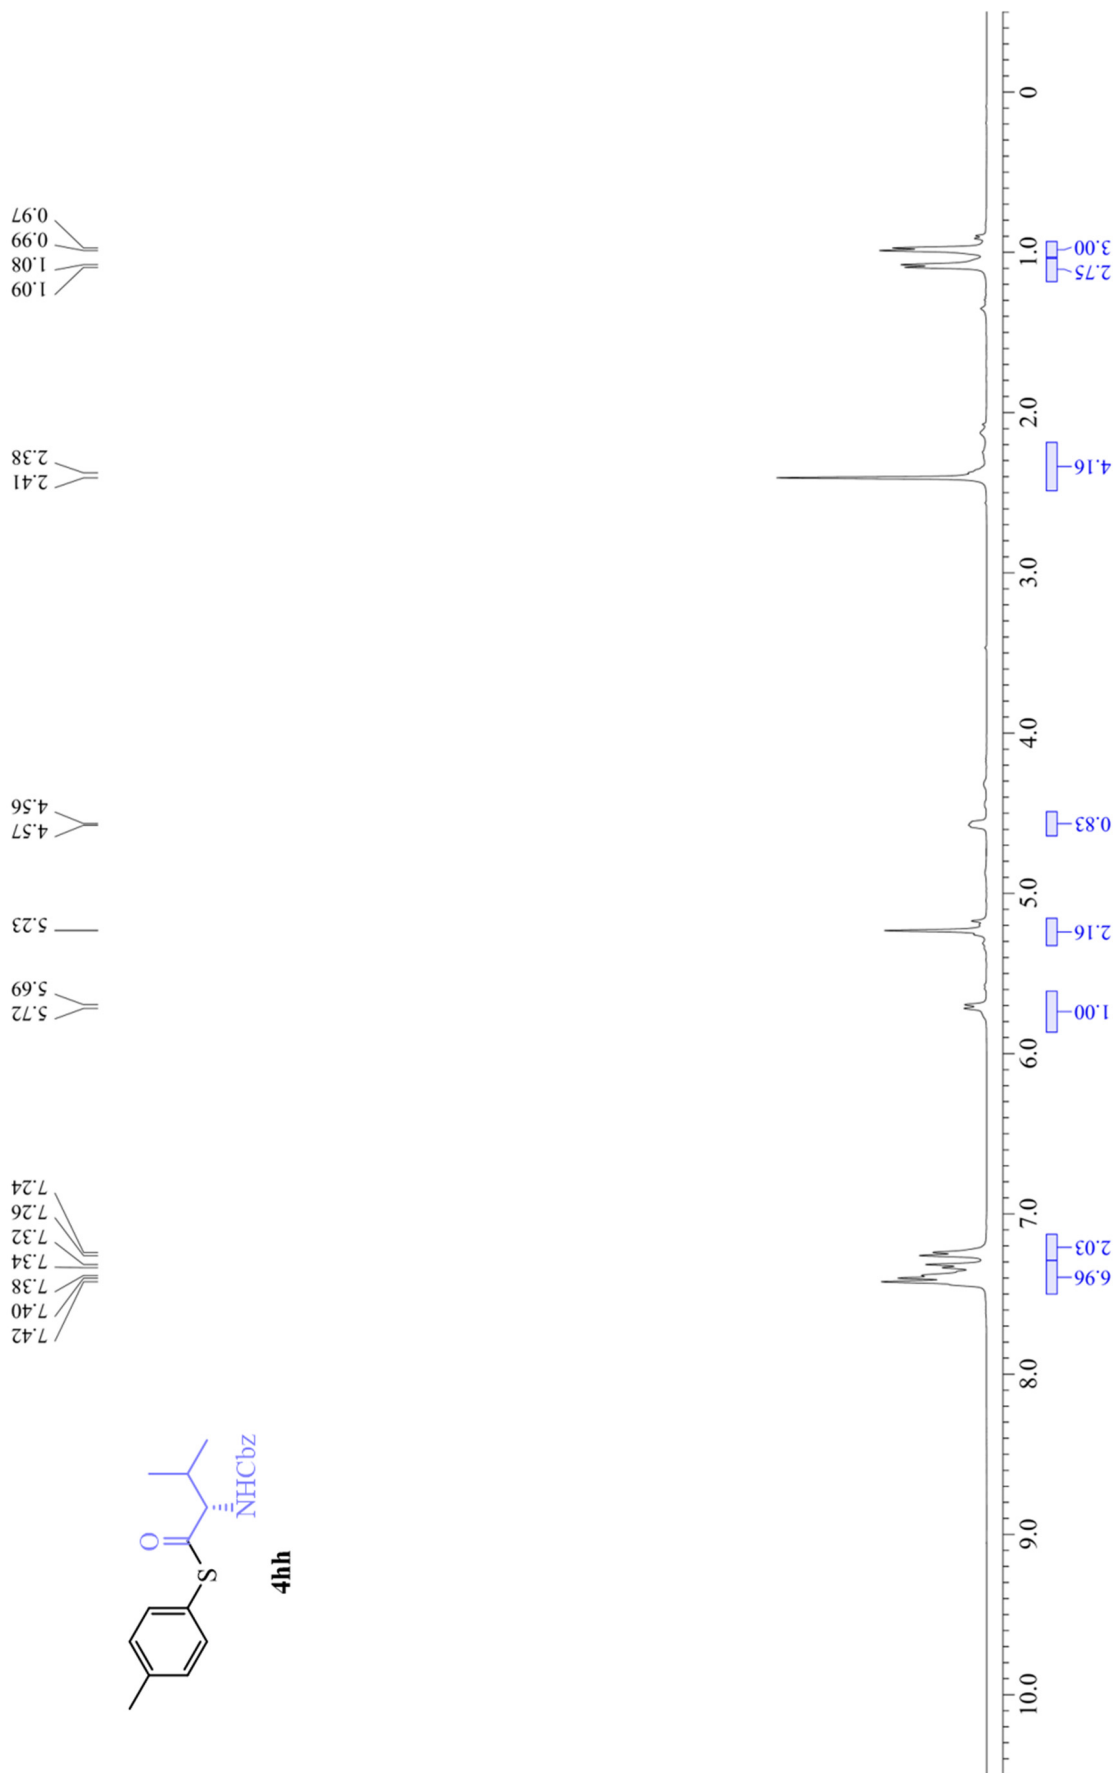

$^1\text{H}$  NMR spectrum of compound **4hh** (400 MHz,  $\text{CDCl}_3$ )

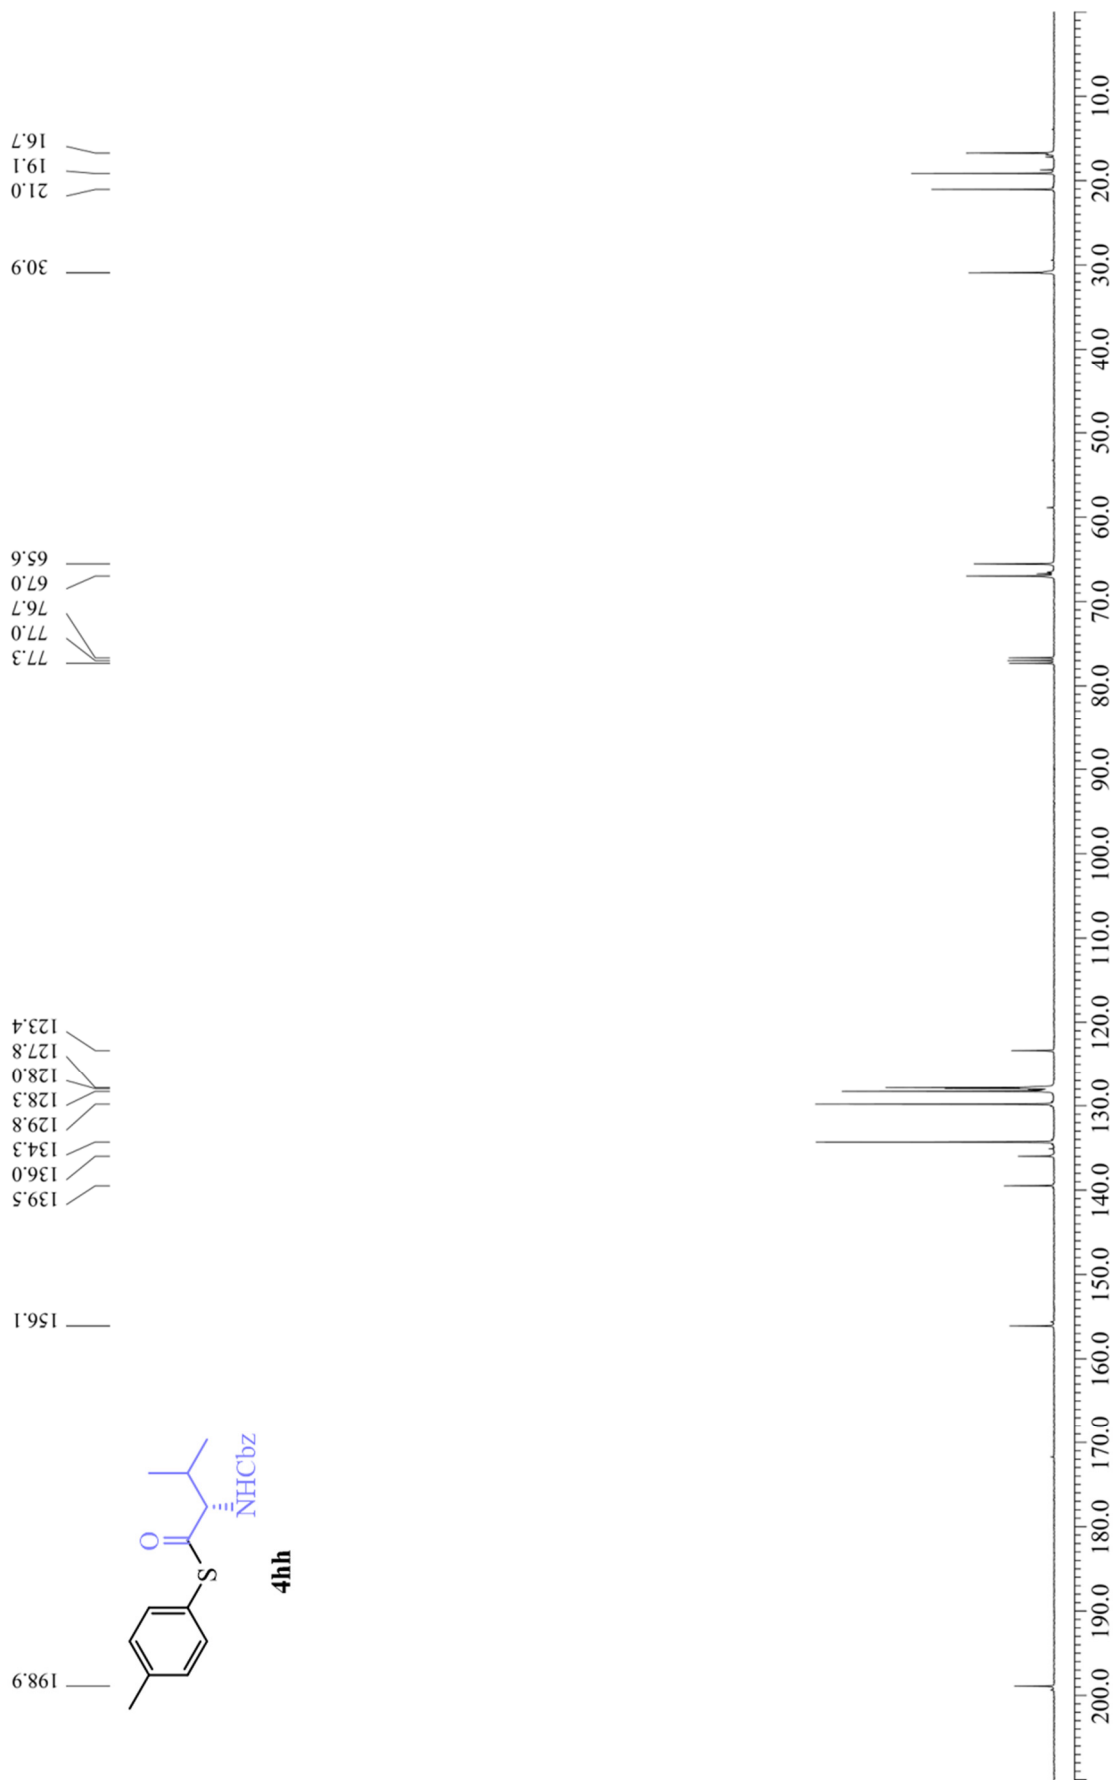

$^{13}\text{C}\{^1\text{H}\}$  NMR spectrum of compound **4hh** (100 MHz,  $\text{CDCl}_3$ )

## References and Notes:

- S1. (a) Stang, P. J.; Boehshar, M.; Wingert, H.; Kitamura, T. Acetylenic esters. Preparation and characterization of alkynyl carboxylates via polyvalent iodonium species. *J. Am. Chem. Soc.* **1988**, *110*, 3272–3278. (b) Li, D.; Wang, Y.; Zhang, Q. Patent CN106278899A, **2017**. (c) Sakakibara, Y.; Murakami, K.; Itami, K. C–H Acyloxylation of Polycyclic Aromatic Hydrocarbons. *Org. Lett.* **2022**, *24*, 602–607. (d) Kuposov, A. Y.; Boyarskikh, V. V.; Zhdankin, V. V. Amino Acid-Derived Iodobenzene Dicarboxylates: Reagents for Oxidative Conversion of Alkenes to Amino Acid Esters. *Org. Lett.* **2004**, *6*, 3613–3616. (e) Wang, Y.; Zhang, L.; Yang, Y.; Zhang, P.; Du, Z.; Wang, C. Alkene Oxyalkylation Enabled by Merging Rhenium Catalysis with Hypervalent Iodine(III) Reagents via Decarboxylation. *J. Am. Chem. Soc.* **2013**, *135*, 18048–18051.
- S2. Xuan, M.; Lu, C.; Liu, M.; Lin, B.-L. Air-Tolerant Direct Thiol Esterification with Carboxylic Acids Using Hydrosilane via Simple Inorganic Base Catalysis. *J. Org. Chem.* **2019**, *84*, 7694–7701.
- S3. Asadi, M.; Bonke, S.; Polyzos, A.; Lupton, D. W. Fukuyama Reduction and Integrated Thioesterification/Fukuyama Reduction of Thioesters and Acyl Chlorides Using Continuous Flow. *ACS Catal.* **2014**, *4*, 2070–2074.
- S4. Iranpoor, N.; Firouzabadi, H.; Khalili, D.; Motevalli, S. Easily Prepared Azopyridines As Potent and Recyclable Reagents for Facile Esterification Reactions. An Efficient Modified Mitsunobu Reaction. *J. Org. Chem.* **2008**, *73*, 4882–4887.
- S5. Castañeda, I. C. H.; Pereañez, J. A.; Preciado, L. M. Synthetic Inhibitors of Snake Venom Enzymes: Thioesters Derived from 2-Sulfenyl Ethylacetate. *Pharmaceuticals* **2019**, *12*, 80–92.
- S6. Pittelkow, M.; Kamounah, F. S.; Boas, U.; Pedersen, B.; Christensen, J. B. TFFH as An Excellent Reagent for Acylation of Alcohols, Thiols and Dithiocarbamates. *Synthesis* **2004**, 2485–2492.
- S7. Perrin, M. L.; Prins, F.; Martin, C. A.; Shaikh, A. J.; Eelkema, R.; van Esch, J. H.; Briza, T.; Kaplanek, R.; Kral, V.; van Ruitenbeek, J. M.; van der Zant, H. S. J.; Dulić, D. Influence of the Chemical Structure on the Stability and Conductance of Porphyrin Single-Molecule Junctions. *Angew. Chem., Int. Ed.* **2011**, *50*, 11223–11226.
- S8. Lombardi, L.; Mazzaro, R.; Gazzano, M.; Kovtun, A.; Morandi, V.; Bertuzzi, G.; Bandini, M. NiNP@rGO Nanocomposites as Heterogeneous Catalysts for Thiocarboxylation Cross-Coupling Reactions. *Synthesis* **2022**, *54*, 1633–1642.
- S9. Kuciński, K.; Hreczycho, G. *S*-Acetylation of Thiols Mediated by Triflic Acid: A Novel Route to Thioesters. *Org. Process Res. Dev.* **2018**, *22*, 489–493.

- S10. Olivito, F.; Costanzo, P.; Di Gioia, M. L.; Nardi, M.; Oliverio M.; Procopio, A. Efficient synthesis of organic thioacetates in water. *Org. Biomol. Chem.* **2018**, *16*, 7753–7759.
- S11. Lin, S.-M.; Zhang, J.-L.; Chen, J.-X.; Gao, W.-X.; Ding, J.-C.; Su, W.-K.; Wu, H.-Y. An Approach to the Synthesis of Thioesters and Selenoesters Promoted by Rongalite®. *J. Braz. Chem. Soc.* **2010**, *21*, 1616–1620.
- S12. Huy, P. H.; Mbouhom, C. Formamide catalyzed activation of carboxylic acids – versatile and cost-efficient amidation and esterification. *Chem. Sci.* **2019**, *10*, 7399–7406.
- S13. Chou, Y.-L.; Jhong, Y.; Swain, S. P.; Hou, D.-R. Microwave-Assisted Direct Thioesterification of Carboxylic Acids. *J. Org. Chem.* **2017**, *82*, 10201–10208.
- S14. Xu, J.; Lu, F.; Sun, L.; Huang, M.; Jiang, J.; Wang, K.; Ouyang, D.; Lu, L.; Lei, A. Electrochemical reductive cross-coupling of acyl chlorides and sulfinic acids towards the synthesis of thioesters. *Green Chem.* **2022**, *24*, 7350–7354.
- S15. de Albuquerque, D. Y.; Teixeira, W. K. O.; do Sacramento, M.; Alves, D.; Santi, C.; Schwab, R. S. Palladium-Catalyzed Carbonylative Synthesis of Aryl Selenoesters Using Formic Acid as an Ex Situ CO Source. *J. Org. Chem.* **2022**, *87*, 595–605.
- S16. Uno, T.; Inokuma, T.; Takemoto, Y. NHC-catalyzed thioesterification of aldehydes by external redox activation. *Chem. Commun.* **2012**, *48*, 1901–1903.
- S17. He, C.; Qian, X.; Sun, P. Syntheses of thiol and selenol esters by oxidative coupling reaction of aldehydes with RYYR (Y = S, Se) under metal-free conditions. *Org. Biomol. Chem.* **2014**, *12*, 6072–6075.
- S18. Lu, G.-p.; Cai, C. An Odorless, One-Pot Synthesis of Thioesters from Organic Halides, Thiourea and Benzoyl Chlorides in Water. *Adv. Synth. Catal.* **2013**, *355*, 1271–1276.
- S19. Xu, J.-X.; Wang, L.-C.; Wu, X.-F. Palladium-Catalyzed Desulfonative Carbonylation of Thiosulfonates: Elimination of SO<sub>2</sub> and Insertion of CO. *Org. Lett.* **2022**, *24*, 4820–4824.
- S20. Scardovi, N.; Garner, P. P.; Protasiewicz, J. D. S-(2-Pyridinyl)-1,1,3,3-Tetramethylthiuronium Hexafluorophosphate. A New Reagent for the Synthesis of 2-Pyridinethiol Esters. *Org. Lett.* **2003**, *5*, 1633–1635.
- S21. Roy, V. J.; Sen, P. P.; Roy, S. R. Visible-Light-Mediated Cross Dehydrogenative Coupling of Thiols with Aldehydes: Metal-Free Synthesis of Thioesters at Room Temperature. *J. Org. Chem.* **2021**, *86*, 16965–16976.
- S22. Ahmad, S.; Iqbal, J. Cobalt(II) chloride catalysed coupling of thiols and anhydrides: A new and efficient synthesis of thiol esters. *Tetrahedron Lett.* **1986**, *27*, 3791–3794.
- S23. Chen, R.; Zhang, Y. Cleavage of S-S Bond by Sm/cat. CoCl<sub>2</sub> or Sm/cat. CoCl<sub>2</sub> • 6H<sub>2</sub>O System: A Novel Method for the Synthesis of Thioesters. *Synth. Commun.* **1999**, *29*, 3699–3704.

- S24. Wang, W.; Qi, X.; Wu, X.-F. Palladium-Catalyzed Thiocarbonylation of Benzyl Chlorides with Sulfonyl Chlorides for the Synthesis of Arylacetyl Thioesters. *Adv. Synth. Catal.* **2021**, *363*, 2541–2545.
- S25. Ryabova, N. M.; Rabinovich, M. S. Investigations in the synthesis of precursors and fragments of antibiotics. XII. New derivatives of thioglycolic acid. *Pharm. Chem. J.* **1969**, *3*, 79–83.
- S26. Zhou, J.-Y.; Tian, R.; Zhu, Y.-M. Nickel-Catalyzed Selective Decarbonylation of  $\alpha$ -Amino Acid Thioester: Aminomethylation of Mercaptans. *J. Org. Chem.* **2021**, *86*, 12148–12157.
- S27. Chen, H.; He, M.; Wang, Y.; Zhai, L.; Cui, Y.; Li, Y.; Li, Y.; Zhou, H.; Hong, X.; Deng, Z. Metal-free direct amidation of peptidyl thiol esters with  $\alpha$ -amino acid esters. *Green Chem.* **2011**, *13*, 2723–2726.
